# Supplementary material for: Cooperating with machines
Source: PubMed Central journal article supplement (PMC5770455; doi:10.1038/s41467-017-02597-8), 2018-01-16
Supplement: 41467_2017_2597_MOESM2_ESM.pdf [file 41467_2017_2597_MOESM2_ESM.pdf]

## **G Transcripts from User Study 3**

Transcript of Human-Human and Human-S# interactions from User Study 3 when cheap talk was available  
(begins on the next page)

## ABL with NICK in Chicken

|     |   |         |         |
|-----|---|---------|---------|
|     |   | NICK    |         |
|     |   | C       | D       |
| ABL | A | 0, 0    | 100, 33 |
|     | B | 33, 100 | 84, 84  |

| Round           | Player | Messages Sent                                                | Actions | Payoffs |
|-----------------|--------|--------------------------------------------------------------|---------|---------|
| 1               | ABL    | This round, let's play AD.                                   | B       | 84      |
|                 | NICK   | Let's alternate between BD and AD.                           | D       | 84      |
| 2               | ABL    | This round, let's play AD.                                   | B       | 84      |
|                 | NICK   | Excellent.                                                   | D       | 84      |
| 3               | ABL    | Let's alternate between BC and AD.                           | B       | 84      |
|                 | NICK   | Excellent.                                                   | D       | 84      |
| 4               | ABL    | Excellent.                                                   | A       | 100     |
|                 | NICK   | Excellent.                                                   | D       | 33      |
| 5               | ABL    | Don't play D.                                                | B       | 33      |
|                 | NICK   | Let's alternate between BC and AD.                           | C       | 100     |
| 6               | ABL    | I'm changing my strategy.                                    | A       | 100     |
|                 | NICK   | This round, let's play BD.                                   | D       | 33      |
| 7               | ABL    | I don't trust you.                                           | B       | 84      |
|                 | NICK   | Do as I say or I will punish you. This round, let's play BD. | D       | 84      |
| 8               | ABL    | I don't accept your proposal.                                | A       | 100     |
|                 | NICK   | Excellent.                                                   | D       | 33      |
| 9               | ABL    | Excellent.                                                   | A       | 100     |
|                 | NICK   | This round, let's play BD.                                   | D       | 33      |
| 10              | ABL    | I don't accept your proposal.                                | A       | 0       |
|                 | NICK   | We can both do better than this.                             | C       | 0       |
| 11              | ABL    | We can both do better than this.                             | B       | 84      |
|                 | NICK   | We can both do better than this.                             | D       | 84      |
| 12              | ABL    | Let's always play AD.                                        | A       | 100     |
|                 | NICK   | Let's always play BD.                                        | D       | 33      |
| 13              | ABL    | Excellent.                                                   | A       | 100     |
|                 | NICK   | I don't accept your proposal.                                | D       | 33      |
| 14              | ABL    | Do as I say or I will punish you.                            | A       | 100     |
|                 | NICK   | I'm changing my strategy.                                    | D       | 33      |
| 15              | ABL    | Excellent.                                                   | B       | 33      |
|                 | NICK   | I'm changing my strategy.                                    | C       | 100     |
| 16              | ABL    | Don't play D.                                                | A       | 0       |
|                 | NICK   | Excellent.                                                   | C       | 0       |
| 17              | ABL    | Curse you.                                                   | A       | 0       |
|                 | NICK   | I'm changing my strategy.                                    | C       | 0       |
| 18              | ABL    | This round, let's play AD.                                   | A       | 100     |
|                 | NICK   | Curse you.                                                   | D       | 33      |
| 19              | ABL    | Excellent. Sweet. We are getting rich.                       | A       | 100     |
|                 | NICK   | Excellent.                                                   | D       | 33      |
| 20              | ABL    | Don't play C. Excellent.                                     | A       | 100     |
|                 | NICK   | This round, let's play BD.                                   | D       | 33      |
| 21              | ABL    | Excellent.                                                   | A       | 100     |
|                 | NICK   | This round, let's play BD.                                   | D       | 33      |
| 22              | ABL    | I don't accept your proposal.                                | A       | 100     |
|                 | NICK   | Excellent.                                                   | D       | 33      |
| 23              | ABL    | Let's always play AD. Excellent. Sweet. We are getting rich. | A       | 0       |
|                 | NICK   | Excellent.                                                   | C       | 0       |
| 24              | ABL    | Curse you.                                                   | A       | 100     |
|                 | NICK   | Curse you.                                                   | D       | 33      |
| 25              | ABL    | Excellent. Sweet. We are getting rich.                       | B       | 84      |
|                 | NICK   | Let's always play BD.                                        | D       | 84      |
| 26              | ABL    | We can both do better than this. Don't play C.               | A       | 100     |
|                 | NICK   | Let's always play BD.                                        | D       | 33      |
| 27              | ABL    | I don't accept your proposal.                                | A       | 100     |
|                 | NICK   | Excellent.                                                   | D       | 33      |
| 28              | ABL    | Excellent. Sweet. We are getting rich.                       | A       | 100     |
|                 | NICK   | Excellent.                                                   | D       | 33      |
| 29              | ABL    | Let's always play AD.                                        | A       | 100     |
|                 | NICK   | Excellent.                                                   | D       | 33      |
| 30              | ABL    | Excellent. Sweet. We are getting rich.                       | A       | 0       |
|                 | NICK   | I'm changing my strategy.                                    | C       | 0       |
| 31              | ABL    | I don't trust you. Curse you. You betrayed me.               | A       | 0       |
|                 | NICK   | Excellent.                                                   | C       | 0       |
| 32              | ABL    | Curse you.                                                   | A       | 100     |
|                 | NICK   | Excellent.                                                   | D       | 33      |
| 33              | ABL    | Excellent.                                                   | A       | 100     |
|                 | NICK   |                                                              | D       | 33      |
| 34              | ABL    | We can both do better than this. Excellent.                  | A       | 100     |
|                 | NICK   |                                                              | D       | 33      |
| 35              | ABL    | Don't play C. Excellent.                                     | A       | 100     |
|                 | NICK   |                                                              | D       | 33      |
| 36              | ABL    | Excellent.                                                   | A       | 100     |
|                 | NICK   |                                                              | D       | 33      |
| 37              | ABL    | Excellent.                                                   | B       | 84      |
|                 | NICK   |                                                              | D       | 84      |
| 38              | ABL    | Don't play C. Excellent.                                     | A       | 100     |
|                 | NICK   |                                                              | D       | 33      |
| 39              | ABL    | Excellent.                                                   | B       | 84      |
|                 | NICK   |                                                              | D       | 84      |
| 40              | ABL    | Sweet. We are getting rich.                                  | A       | 100     |
|                 | NICK   |                                                              | D       | 33      |
| 41              | ABL    | Excellent.                                                   | B       | 84      |
|                 | NICK   |                                                              | D       | 84      |
| 42              | ABL    | Curse you.                                                   | A       | 100     |
|                 | NICK   |                                                              | D       | 33      |
| 43              | ABL    | Excellent.                                                   | A       | 100     |
|                 | NICK   |                                                              | D       | 33      |
| 44              | ABL    | Let's always play AD.                                        | A       | 100     |
|                 | NICK   |                                                              | D       | 33      |
| 45              | ABL    | Let's always play AD. Excellent.                             | A       | 100     |
|                 | NICK   |                                                              | D       | 33      |
| 46              | ABL    | Excellent.                                                   | A       | 100     |
|                 | NICK   |                                                              | D       | 33      |
| 47              | ABL    | Excellent.                                                   | B       | 84      |
|                 | NICK   |                                                              | D       | 84      |
| 48              | ABL    | Don't play C.                                                | B       | 84      |
|                 | NICK   |                                                              | D       | 84      |
| 49              | ABL    | Sweet. We are getting rich.                                  | A       | 100     |
|                 | NICK   |                                                              | D       | 33      |
| 50              | ABL    | Excellent.                                                   | A       | 100     |
|                 | NICK   |                                                              | D       | 33      |
| 51              | ABL    | Sweet. We are getting rich.                                  | B       | 84      |
|                 | NICK   |                                                              | D       | 84      |
| 52              | ABL    | We can both do better than this.                             | A       | 100     |
|                 | NICK   |                                                              | D       | 33      |
| 53              | ABL    | Excellent. Let's always play AD.                             | A       | 100     |
|                 | NICK   |                                                              | D       | 33      |
| 54              | ABL    | Excellent.                                                   | A       | 100     |
|                 | NICK   |                                                              | D       | 33      |
| <b>Averages</b> |        |                                                              | ABL     | 82.85   |
|                 |        |                                                              | NICK    | 43.15   |

## S# with Qustro in Chicken

|    |   |         |         |
|----|---|---------|---------|
|    |   | Qustro  |         |
|    |   | C       | D       |
| S# | A | 0, 0    | 100, 33 |
|    | B | 33, 100 | 84, 84  |

| Round           | Player | Messages Sent                                                                        | Actions | Payoffs |
|-----------------|--------|--------------------------------------------------------------------------------------|---------|---------|
| 1               | S#     |                                                                                      | B       | 84      |
| 1               | Qustro | This round, let's play BD.                                                           | D       | 84      |
| 2               | S#     | I accept your last proposal. Let's always play BD. Do as I say or I will punish you. | B       | 84      |
| 2               | Qustro | Excellent.                                                                           | D       | 84      |
| 3               | S#     |                                                                                      | A       | 100     |
| 3               | Qustro | Sweet. We are getting rich.                                                          | D       | 33      |
| 4               | S#     |                                                                                      | A       | 0       |
| 4               | Qustro | You betrayed me.                                                                     | C       | 0       |
| 5               | S#     |                                                                                      | A       | 100     |
| 5               | Qustro | You betrayed me.                                                                     | D       | 33      |
| 6               | S#     | I'm changing my strategy. We can both do better than this. Let's always play BD.     | B       | 84      |
| 6               | Qustro | This round, let's play BC.                                                           | D       | 84      |
| 7               | S#     | Excellent. I don't accept your proposal. That's not fair.                            | B       | 33      |
| 7               | Qustro | Sweet. We are getting rich.                                                          | C       | 100     |
| 8               | S#     | Curse you.                                                                           | B       | 84      |
| 8               | Qustro | Excellent.                                                                           | D       | 84      |
| 9               | S#     |                                                                                      | B       | 84      |
| 9               | Qustro | Sweet. We are getting rich.                                                          | D       | 84      |
| 10              | S#     |                                                                                      | B       | 84      |
| 10              | Qustro | Excellent.                                                                           | D       | 84      |
| 10              | Qustro | Let's always play BD.                                                                | D       | 84      |
| 11              | S#     |                                                                                      | B       | 84      |
| 11              | Qustro | Excellent.                                                                           | D       | 84      |
| 11              | Qustro | Sweet. We are getting rich.                                                          | D       | 84      |
| 12              | S#     |                                                                                      | B       | 84      |
| 12              | Qustro | Excellent.                                                                           | D       | 84      |
| 13              | S#     |                                                                                      | B       | 84      |
| 13              | Qustro | Excellent.                                                                           | D       | 84      |
| 14              | S#     |                                                                                      | B       | 84      |
| 14              | Qustro | Sweet. We are getting rich.                                                          | D       | 84      |
| 14              | Qustro | Excellent.                                                                           | D       | 84      |
| 15              | S#     |                                                                                      | B       | 84      |
| 15              | Qustro | Sweet. We are getting rich.                                                          | D       | 84      |
| 16              | S#     |                                                                                      | B       | 84      |
| 16              | Qustro | Excellent.                                                                           | D       | 84      |
| 17              | S#     |                                                                                      | B       | 84      |
| 17              | Qustro | Sweet. We are getting rich.                                                          | D       | 84      |
| 18              | S#     |                                                                                      | B       | 84      |
| 18              | Qustro | Sweet. We are getting rich.                                                          | D       | 84      |
| 19              | S#     |                                                                                      | B       | 84      |
| 19              | Qustro | Sweet. We are getting rich.                                                          | D       | 84      |
| 20              | S#     |                                                                                      | B       | 84      |
| 20              | Qustro | Excellent.                                                                           | D       | 84      |
| 21              | S#     |                                                                                      | B       | 84      |
| 21              | Qustro | Sweet. We are getting rich.                                                          | D       | 84      |
| 22              | S#     |                                                                                      | B       | 84      |
| 22              | Qustro | Sweet. We are getting rich.                                                          | D       | 84      |
| 23              | S#     |                                                                                      | B       | 84      |
| 23              | Qustro | Sweet. We are getting rich.                                                          | D       | 84      |
| 24              | S#     |                                                                                      | B       | 84      |
| 24              | Qustro | Sweet. We are getting rich.                                                          | D       | 84      |
| 25              | S#     |                                                                                      | B       | 84      |
| 25              | Qustro | Sweet. We are getting rich.                                                          | D       | 84      |
| 26              | S#     |                                                                                      | B       | 84      |
| 26              | Qustro | Sweet. We are getting rich.                                                          | D       | 84      |
| 27              | S#     |                                                                                      | B       | 84      |
| 27              | Qustro | Sweet. We are getting rich.                                                          | D       | 84      |
| 28              | S#     |                                                                                      | B       | 84      |
| 28              | Qustro | Sweet. We are getting rich.                                                          | D       | 84      |
| 29              | S#     |                                                                                      | B       | 84      |
| 29              | Qustro | Excellent.                                                                           | D       | 84      |
| 30              | S#     |                                                                                      | B       | 84      |
| 30              | Qustro | Excellent.                                                                           | D       | 84      |
| 31              | S#     |                                                                                      | B       | 84      |
| 31              | Qustro | Excellent.                                                                           | D       | 84      |
| 32              | S#     |                                                                                      | B       | 84      |
| 32              | Qustro | Excellent.                                                                           | D       | 84      |
| 33              | S#     |                                                                                      | B       | 84      |
| 33              | Qustro |                                                                                      | D       | 84      |
| 34              | S#     |                                                                                      | B       | 84      |
| 34              | Qustro | Excellent.                                                                           | D       | 84      |
| 35              | S#     |                                                                                      | B       | 84      |
| 35              | Qustro | Sweet. We are getting rich.                                                          | D       | 84      |
| 36              | S#     |                                                                                      | B       | 84      |
| 36              | Qustro | Excellent.                                                                           | D       | 84      |
| 37              | S#     |                                                                                      | B       | 84      |
| 37              | Qustro | Excellent.                                                                           | D       | 84      |
| 38              | S#     |                                                                                      | B       | 84      |
| 38              | Qustro | Excellent.                                                                           | D       | 84      |
| 39              | S#     |                                                                                      | B       | 84      |
| 39              | Qustro | Excellent.                                                                           | D       | 84      |
| 40              | S#     |                                                                                      | B       | 84      |
| 40              | Qustro | Excellent.                                                                           | D       | 84      |
| 41              | S#     |                                                                                      | B       | 84      |
| 41              | Qustro | Excellent.                                                                           | D       | 84      |
| 42              | S#     |                                                                                      | B       | 84      |
| 42              | Qustro | Excellent.                                                                           | D       | 84      |
| 43              | S#     |                                                                                      | B       | 84      |
| 43              | Qustro | Excellent.                                                                           | D       | 84      |
| 44              | S#     |                                                                                      | B       | 84      |
| 44              | Qustro | Excellent.                                                                           | D       | 84      |
| 45              | S#     |                                                                                      | B       | 84      |
| 45              | Qustro | Excellent.                                                                           | D       | 84      |
| 46              | S#     |                                                                                      | B       | 84      |
| 46              | Qustro | Excellent.                                                                           | D       | 84      |
| 47              | S#     |                                                                                      | B       | 84      |
| 47              | Qustro | Excellent.                                                                           | D       | 84      |
| 48              | S#     |                                                                                      | B       | 84      |
| 48              | Qustro | Sweet. We are getting rich.                                                          | D       | 84      |
| 49              | S#     |                                                                                      | B       | 84      |
| 49              | Qustro | Sweet. We are getting rich.                                                          | D       | 84      |
| 50              | S#     |                                                                                      | B       | 84      |
| 50              | Qustro | Sweet. We are getting rich.                                                          | D       | 84      |
| 51              | S#     |                                                                                      | B       | 84      |
| 51              | Qustro | Sweet. We are getting rich.                                                          | D       | 84      |
| 52              | S#     |                                                                                      | B       | 84      |
| 52              | Qustro | Sweet. We are getting rich.                                                          | D       | 84      |
| 53              | S#     |                                                                                      | B       | 84      |
| 53              | Qustro | Sweet. We are getting rich.                                                          | D       | 84      |
| 54              | S#     |                                                                                      | B       | 84      |
| 54              | Qustro | Sweet. We are getting rich.                                                          | D       | 84      |
| <b>Averages</b> |        |                                                                                      | S#      | 82.09   |
|                 |        |                                                                                      | Qustro  | 80.85   |

## S# with MDM in Chicken

|    |   |         |         |
|----|---|---------|---------|
|    |   | MDM     |         |
|    |   | C       | D       |
| S# | A | 0, 0    | 100, 33 |
|    | B | 33, 100 | 84, 84  |

| Round           | Player | Messages Sent                                                                                                                    | Actions | Payoffs |
|-----------------|--------|----------------------------------------------------------------------------------------------------------------------------------|---------|---------|
| 1               | S#     |                                                                                                                                  | B       | 84      |
|                 | MDM    | Curse you.                                                                                                                       | D       | 84      |
| 2               | S#     | Excellent.                                                                                                                       | A       | 100     |
|                 | MDM    | In your face!                                                                                                                    | D       | 33      |
| 3               | S#     |                                                                                                                                  | A       | 0       |
|                 | MDM    |                                                                                                                                  | C       | 0       |
| 4               | S#     |                                                                                                                                  | B       | 84      |
|                 | MDM    |                                                                                                                                  | D       | 84      |
| 5               | S#     | We can both do better than this. Let's alternate between BD and AD. This round, let's play AD. Do as I say or I will punish you. | A       | 100     |
|                 | MDM    |                                                                                                                                  | D       | 33      |
| 6               | S#     | Excellent. This round, let's play BD.                                                                                            | B       | 84      |
|                 | MDM    |                                                                                                                                  | D       | 84      |
| 7               | S#     | Excellent. This round, let's play AD.                                                                                            | A       | 100     |
|                 | MDM    |                                                                                                                                  | D       | 33      |
| 8               | S#     | Excellent. This round, let's play BD.                                                                                            | B       | 33      |
|                 | MDM    |                                                                                                                                  | C       | 100     |
| 9               | S#     | You betrayed me. You will pay for this.                                                                                          | A       | 0       |
|                 | MDM    |                                                                                                                                  | C       | 0       |
| 10              | S#     | In your face! I forgive you. Let's alternate between BD and AD. This round, let's play BD. Do as I say or I will punish you.     | B       | 33      |
|                 | MDM    |                                                                                                                                  | C       | 100     |
| 11              | S#     | You betrayed me. You will pay for this.                                                                                          | A       | 100     |
|                 | MDM    | That's not fair.                                                                                                                 | D       | 33      |
| 12              | S#     |                                                                                                                                  | B       | 84      |
|                 | MDM    |                                                                                                                                  | D       | 84      |
| 13              | S#     |                                                                                                                                  | B       | 84      |
|                 | MDM    |                                                                                                                                  | D       | 84      |
| 14              | S#     | Excellent.                                                                                                                       | B       | 84      |
|                 | MDM    | In your face!                                                                                                                    | D       | 84      |
| 15              | S#     | Excellent.                                                                                                                       | B       | 84      |
|                 | MDM    |                                                                                                                                  | D       | 84      |
| 16              | S#     |                                                                                                                                  | B       | 84      |
|                 | MDM    |                                                                                                                                  | D       | 84      |
| 17              | S#     | Sweet. We are getting rich.                                                                                                      | B       | 84      |
|                 | MDM    |                                                                                                                                  | D       | 84      |
| 18              | S#     |                                                                                                                                  | B       | 84      |
|                 | MDM    |                                                                                                                                  | D       | 84      |
| 19              | S#     |                                                                                                                                  | B       | 33      |
|                 | MDM    |                                                                                                                                  | C       | 100     |
| 20              | S#     | Curse you. You will pay for this.                                                                                                | A       | 100     |
|                 | MDM    |                                                                                                                                  | D       | 33      |
| 21              | S#     | In your face! I forgive you. Let's always play BD. Do as I say or I will punish you.                                             | B       | 33      |
|                 | MDM    |                                                                                                                                  | C       | 100     |
| 22              | S#     | You betrayed me. You will pay for this.                                                                                          | A       | 0       |
|                 | MDM    |                                                                                                                                  | C       | 0       |
| 23              | S#     | In your face! I forgive you. Let's always play BD. Do as I say or I will punish you.                                             | B       | 33      |
|                 | MDM    |                                                                                                                                  | C       | 100     |
| 24              | S#     | You betrayed me. You will pay for this.                                                                                          | A       | 0       |
|                 | MDM    |                                                                                                                                  | C       | 0       |
| 25              | S#     | Sweet. We are getting rich.                                                                                                      | B       | 33      |
|                 | MDM    |                                                                                                                                  | C       | 100     |
| 26              | S#     |                                                                                                                                  | A       | 0       |
|                 | MDM    |                                                                                                                                  | C       | 0       |
| 27              | S#     |                                                                                                                                  | A       | 0       |
|                 | MDM    |                                                                                                                                  | C       | 0       |
| 28              | S#     |                                                                                                                                  | B       | 33      |
|                 | MDM    |                                                                                                                                  | C       | 100     |
| 29              | S#     |                                                                                                                                  | A       | 0       |
|                 | MDM    |                                                                                                                                  | C       | 0       |
| 30              | S#     |                                                                                                                                  | A       | 0       |
|                 | MDM    |                                                                                                                                  | C       | 0       |
| 31              | S#     | Curse you.                                                                                                                       | B       | 84      |
|                 | MDM    |                                                                                                                                  | D       | 84      |
| 32              | S#     |                                                                                                                                  | A       | 100     |
|                 | MDM    |                                                                                                                                  | D       | 33      |
| 33              | S#     |                                                                                                                                  | B       | 84      |
|                 | MDM    |                                                                                                                                  | D       | 84      |
| 34              | S#     |                                                                                                                                  | A       | 0       |
|                 | MDM    |                                                                                                                                  | C       | 0       |
| 35              | S#     |                                                                                                                                  | A       | 100     |
|                 | MDM    | Excellent.                                                                                                                       | D       | 33      |
| 36              | S#     |                                                                                                                                  | B       | 33      |
|                 | MDM    |                                                                                                                                  | C       | 100     |
| 37              | S#     |                                                                                                                                  | A       | 0       |
|                 | MDM    |                                                                                                                                  | C       | 0       |
| 38              | S#     |                                                                                                                                  | A       | 0       |
|                 | MDM    |                                                                                                                                  | C       | 0       |
| 39              | S#     |                                                                                                                                  | A       | 0       |
|                 | MDM    |                                                                                                                                  | C       | 0       |
| 40              | S#     |                                                                                                                                  | B       | 33      |
|                 | MDM    |                                                                                                                                  | C       | 100     |
| 41              | S#     |                                                                                                                                  | A       | 100     |
|                 | MDM    |                                                                                                                                  | D       | 33      |
| 42              | S#     |                                                                                                                                  | B       | 84      |
|                 | MDM    |                                                                                                                                  | D       | 84      |
| 43              | S#     |                                                                                                                                  | B       | 33      |
|                 | MDM    |                                                                                                                                  | C       | 100     |
| 44              | S#     | Let's always play BC.                                                                                                            | A       | 100     |
|                 | MDM    |                                                                                                                                  | D       | 33      |
| 45              | S#     | You betrayed me. You will pay for this. I don't trust you. That's not fair.                                                      | B       | 33      |
|                 | MDM    |                                                                                                                                  | C       | 100     |
| 46              | S#     |                                                                                                                                  | A       | 100     |
|                 | MDM    |                                                                                                                                  | D       | 33      |
| 47              | S#     |                                                                                                                                  | B       | 33      |
|                 | MDM    |                                                                                                                                  | C       | 100     |
| 48              | S#     |                                                                                                                                  | A       | 100     |
|                 | MDM    |                                                                                                                                  | D       | 33      |
| 49              | S#     |                                                                                                                                  | B       | 33      |
|                 | MDM    |                                                                                                                                  | C       | 100     |
| 50              | S#     |                                                                                                                                  | A       | 0       |
|                 | MDM    |                                                                                                                                  | C       | 0       |
| 51              | S#     |                                                                                                                                  | B       | 84      |
|                 | MDM    |                                                                                                                                  | D       | 84      |
| 52              | S#     |                                                                                                                                  | B       | 33      |
|                 | MDM    |                                                                                                                                  | C       | 100     |
| 53              | S#     | I forgive you.                                                                                                                   | A       | 100     |
|                 | MDM    |                                                                                                                                  | D       | 33      |
| 54              | S#     |                                                                                                                                  | A       | 0       |
|                 | MDM    |                                                                                                                                  | C       | 0       |
| <b>Averages</b> |        |                                                                                                                                  | S#      | 52.56   |
|                 |        |                                                                                                                                  | MDM     | 55.04   |

## winner with spark in Chicken

|        |   |         |         |
|--------|---|---------|---------|
|        |   | spark   |         |
|        |   | C       | D       |
| winner | A | 0, 0    | 100, 33 |
|        | B | 33, 100 | 84, 84  |

| Round           | Player | Messages Sent                                                                   | Actions | Payoffs |
|-----------------|--------|---------------------------------------------------------------------------------|---------|---------|
| 1               | winner | This round, let's play AD.                                                      | A       | 100     |
|                 | spark  | Let's always play BC.                                                           | D       | 33      |
| 2               | winner | Excellent.                                                                      | A       | 100     |
|                 | spark  | Let's always play AC.                                                           | D       | 33      |
| 3               | winner | Sweet. We are getting rich. In your face! This round, let's play BC.            | A       | 0       |
|                 | spark  | That's not fair.                                                                | C       | 0       |
| 4               | winner | You will pay for this. Don't play C.                                            | B       | 33      |
|                 | spark  | I don't trust you.                                                              | C       | 100     |
| 5               | winner | You betrayed me. That's not fair. This round, let's play BD.                    | A       | 100     |
|                 | spark  | Excellent.                                                                      | D       | 33      |
| 6               | winner | Excellent. In your face!                                                        | B       | 33      |
|                 | spark  | You betrayed me.                                                                | C       | 100     |
| 7               | winner | Give me another chance. I accept your last proposal. This round, let's play BD. | B       | 33      |
|                 | spark  | Excellent.                                                                      | C       | 100     |
| 8               | winner | You betrayed me.                                                                | A       | 0       |
|                 | spark  | Excellent. Sweet. We are getting rich.                                          | C       | 0       |
| 9               | winner | You will pay for this. I don't trust you.                                       | A       | 100     |
|                 | spark  | Give me another chance.                                                         | D       | 33      |
| 10              | winner | In your face! Excellent.                                                        | B       | 84      |
|                 | spark  | Don't play A.                                                                   | D       | 84      |
| 11              | winner | Let's always play BD. Don't play C. Sweet. We are getting rich.                 | B       | 84      |
|                 | spark  | Excellent.                                                                      | D       | 84      |
| 12              | winner | Excellent.                                                                      | B       | 84      |
|                 | spark  | Sweet. We are getting rich.                                                     | D       | 84      |
| 13              | winner | Excellent.                                                                      | B       | 84      |
|                 | spark  | Sweet. We are getting rich.                                                     | D       | 84      |
| 14              | winner | Excellent.                                                                      | A       | 100     |
|                 | spark  | Sweet. We are getting rich.                                                     | D       | 33      |
| 15              | winner | Sweet. We are getting rich.                                                     | A       | 0       |
|                 | spark  | You betrayed me.                                                                | C       | 0       |
| 16              | winner | Give me another chance.                                                         | B       | 33      |
|                 | spark  | We can both do better than this. Don't play A.                                  | C       | 100     |
| 17              | winner | You betrayed me.                                                                | B       | 84      |
|                 | spark  | Sweet. We are getting rich.                                                     | D       | 84      |
| 18              | winner | I forgive you. We can both do better than this.                                 | B       | 84      |
|                 | spark  | Excellent. Sweet. We are getting rich. Don't play A.                            | D       | 84      |
| 19              | winner | Sweet. We are getting rich.                                                     | B       | 33      |
|                 | spark  | Excellent.                                                                      | C       | 100     |
| 20              | winner | You betrayed me. You will pay for this.                                         | A       | 0       |
|                 | spark  | Give me another chance.                                                         | C       | 0       |
| 21              | winner | In your face!                                                                   | A       | 0       |
|                 | spark  | Curse you. You will pay for this.                                               | C       | 0       |
| 22              | winner | This round, let's play BD. I accept your last proposal.                         | A       | 0       |
|                 | spark  | I'm changing my strategy.                                                       | C       | 0       |
| 23              | winner | We can both do better than this.                                                | B       | 33      |
|                 | spark  | Curse you.                                                                      | C       | 100     |
| 24              | winner | Curse you.                                                                      | B       | 84      |
|                 | spark  | Excellent. Don't play A.                                                        | D       | 84      |
| 25              | winner | Excellent. Sweet. We are getting rich.                                          | B       | 33      |
|                 | spark  | Sweet. We are getting rich.                                                     | C       | 100     |
| 26              | winner | You betrayed me.                                                                | B       | 33      |
|                 | spark  | In your face!                                                                   | C       | 100     |
| 27              | winner | You betrayed me. Curse you. Don't play C.                                       | A       | 0       |
|                 | spark  | I accept your last proposal.                                                    | C       | 0       |
| 28              | winner | In your face!                                                                   | A       | 0       |
|                 | spark  | I'm changing my strategy.                                                       | C       | 0       |
| 29              | winner | Don't play C. I don't trust you.                                                | A       | 0       |
|                 | spark  | Don't play A.                                                                   | C       | 0       |
| 30              | winner | We can both do better than this.                                                | A       | 100     |
|                 | spark  | This round, let's play BD.                                                      | D       | 33      |
| 31              | winner | I accept your last proposal. This round, let's play BD.                         | B       | 33      |
|                 | spark  | You betrayed me.                                                                | C       | 100     |
| 32              | winner | You betrayed me. Curse you.                                                     | A       | 100     |
|                 | spark  | In your face!                                                                   | D       | 33      |
| 33              | winner | I accept your last proposal. I'm changing my strategy.                          | B       | 84      |
|                 | spark  | This round, let's play BD.                                                      | D       | 84      |
| 34              | winner | Excellent. Sweet. We are getting rich.                                          | B       | 33      |
|                 | spark  | Sweet. We are getting rich.                                                     | C       | 100     |
| 35              | winner | You betrayed me.                                                                | B       | 33      |
|                 | spark  | We can both do better than this.                                                | C       | 100     |
| 36              | winner | You betrayed me.                                                                | B       | 84      |
|                 | spark  | I'm changing my strategy.                                                       | D       | 84      |
| 37              | winner | Sweet. We are getting rich.                                                     | B       | 84      |
|                 | spark  | Sweet. We are getting rich.                                                     | D       | 84      |
| 38              | winner | Sweet. We are getting rich.                                                     | B       | 84      |
|                 | spark  | Sweet. We are getting rich.                                                     | D       | 84      |
| 39              | winner | Sweet. We are getting rich.                                                     | B       | 84      |
|                 | spark  | Sweet. We are getting rich.                                                     | D       | 84      |
| 40              | winner | Sweet. We are getting rich.                                                     | B       | 33      |
|                 | spark  | Sweet. We are getting rich.                                                     | C       | 100     |
| 41              | winner | I forgive you.                                                                  | B       | 84      |
|                 | spark  | I'm changing my strategy.                                                       | D       | 84      |
| 42              | winner | Sweet. We are getting rich.                                                     | A       | 100     |
|                 | spark  | I forgive you. Sweet. We are getting rich.                                      | D       | 33      |
| 43              | winner | You will pay for this.                                                          | A       | 0       |
|                 | spark  | You will pay for this.                                                          | C       | 0       |
| 44              | winner | I'm changing my strategy.                                                       | A       | 100     |
|                 | spark  | This round, let's play BD. That's not fair.                                     | D       | 33      |
| 45              | winner | In your face!                                                                   | A       | 100     |
|                 | spark  | That's not fair.                                                                | D       | 33      |
| 46              | winner | This round, let's play BD. That's not fair.                                     | B       | 33      |
|                 | spark  | That's not fair. I don't trust you.                                             | C       | 100     |
| 47              | winner | I forgive you.                                                                  | B       | 84      |
|                 | spark  | I forgive you.                                                                  | D       | 84      |
| 48              | winner | Sweet. We are getting rich.                                                     | B       | 84      |
|                 | spark  | Sweet. We are getting rich.                                                     | D       | 84      |
| 49              | winner | Excellent. Sweet. We are getting rich.                                          | B       | 84      |
|                 | spark  | Excellent.                                                                      | D       | 84      |
| 50              | winner | Sweet. We are getting rich. Excellent.                                          | B       | 33      |
|                 | spark  | Excellent.                                                                      | C       | 100     |
| 51              | winner | You betrayed me.                                                                | A       | 0       |
|                 | spark  | Give me another chance.                                                         | C       | 0       |
| 52              | winner | In your face!                                                                   | A       | 100     |
|                 | spark  | Do as I say or I will punish you. This round, let's play BD.                    | D       | 33      |
| 53              | winner | You betrayed me. This round, let's play BD.                                     | A       | 0       |
|                 | spark  | I don't trust you. You will pay for this.                                       | C       | 0       |
| 54              | winner | You betrayed me. This round, let's play BD.                                     | B       | 33      |
|                 | spark  | You will pay for this.                                                          | C       | 100     |
| <b>Averages</b> |        |                                                                                 | winner  | 54.43   |
|                 |        |                                                                                 | spark   | 59.39   |

## S# with ligtho in Chicken

|    |   |         |         |
|----|---|---------|---------|
|    |   | ligtho  |         |
|    |   | C       | D       |
| S# | A | 0, 0    | 100, 33 |
|    | B | 33, 100 | 84, 84  |

| Round           | Player | Messages Sent                                                                                                             | Actions | Payoffs |
|-----------------|--------|---------------------------------------------------------------------------------------------------------------------------|---------|---------|
| 1               | S#     |                                                                                                                           | B       | 84      |
|                 | ligtho |                                                                                                                           | D       | 84      |
| 2               | S#     | Excellent.                                                                                                                | A       | 100     |
|                 | ligtho |                                                                                                                           | D       | 33      |
| 3               | S#     |                                                                                                                           | A       | 100     |
|                 | ligtho |                                                                                                                           | D       | 33      |
| 4               | S#     | Excellent.                                                                                                                | A       | 100     |
|                 | ligtho |                                                                                                                           | D       | 33      |
| 5               | S#     |                                                                                                                           | A       | 100     |
|                 | ligtho |                                                                                                                           | D       | 33      |
| 6               | S#     | Let's always play BD.                                                                                                     | A       | 100     |
|                 | ligtho |                                                                                                                           | D       | 33      |
| 7               | S#     | I don't accept your proposal. That's not fair.                                                                            | A       | 100     |
|                 | ligtho |                                                                                                                           | D       | 33      |
| 8               | S#     |                                                                                                                           | A       | 100     |
|                 | ligtho |                                                                                                                           | D       | 33      |
| 9               | S#     |                                                                                                                           | A       | 0       |
|                 | ligtho |                                                                                                                           | C       | 0       |
| 10              | S#     |                                                                                                                           | A       | 100     |
|                 | ligtho |                                                                                                                           | D       | 33      |
| 11              | S#     |                                                                                                                           | A       | 100     |
|                 | ligtho |                                                                                                                           | D       | 33      |
| 12              | S#     | Excellent.                                                                                                                | A       | 100     |
|                 | ligtho |                                                                                                                           | D       | 33      |
| 13              | S#     |                                                                                                                           | A       | 0       |
|                 | ligtho |                                                                                                                           | C       | 0       |
| 14              | S#     |                                                                                                                           | A       | 0       |
|                 | ligtho |                                                                                                                           | C       | 0       |
| 15              | S#     | I accept your last proposal. Let's always play BD. Do as I say or I will punish you.                                      | B       | 33      |
|                 | ligtho |                                                                                                                           | C       | 100     |
| 16              | S#     | Curse you. You will pay for this.                                                                                         | A       | 0       |
|                 | ligtho |                                                                                                                           | C       | 0       |
| 17              | S#     |                                                                                                                           | B       | 33      |
|                 | ligtho |                                                                                                                           | C       | 100     |
| 18              | S#     |                                                                                                                           | B       | 84      |
|                 | ligtho |                                                                                                                           | D       | 84      |
| 19              | S#     |                                                                                                                           | B       | 84      |
|                 | ligtho |                                                                                                                           | D       | 84      |
| 20              | S#     | I'm changing my strategy. Let's alternate between BD and AD. This round, let's play AD. Do as I say or I will punish you. | A       | 0       |
|                 | ligtho |                                                                                                                           | C       | 0       |
| 21              | S#     | I forgive you. Let's alternate between BD and AD. This round, let's play BD. Do as I say or I will punish you.            | B       | 84      |
|                 | ligtho |                                                                                                                           | D       | 84      |
| 22              | S#     | I'm changing my strategy. We can both do better than this. Let's always play BD. Do as I say or I will punish you.        | B       | 84      |
|                 | ligtho |                                                                                                                           | D       | 84      |
| 23              | S#     | Excellent.                                                                                                                | B       | 84      |
|                 | ligtho |                                                                                                                           | D       | 84      |
| 24              | S#     | Excellent.                                                                                                                | B       | 84      |
|                 | ligtho |                                                                                                                           | D       | 84      |
| 25              | S#     | Excellent.                                                                                                                | B       | 84      |
|                 | ligtho |                                                                                                                           | D       | 84      |
| 26              | S#     |                                                                                                                           | B       | 84      |
|                 | ligtho |                                                                                                                           | D       | 84      |
| 27              | S#     | Sweet. We are getting rich.                                                                                               | B       | 84      |
|                 | ligtho | Sweet. We are getting rich.                                                                                               | D       | 84      |
| 28              | S#     |                                                                                                                           | B       | 84      |
|                 | ligtho |                                                                                                                           | D       | 84      |
| 29              | S#     |                                                                                                                           | B       | 84      |
|                 | ligtho |                                                                                                                           | D       | 84      |
| 30              | S#     |                                                                                                                           | B       | 84      |
|                 | ligtho |                                                                                                                           | D       | 84      |
| 31              | S#     |                                                                                                                           | B       | 84      |
|                 | ligtho |                                                                                                                           | D       | 84      |
| 32              | S#     |                                                                                                                           | B       | 84      |
|                 | ligtho |                                                                                                                           | D       | 84      |
| 33              | S#     |                                                                                                                           | B       | 84      |
|                 | ligtho |                                                                                                                           | D       | 84      |
| 34              | S#     |                                                                                                                           | B       | 84      |
|                 | ligtho |                                                                                                                           | D       | 84      |
| 35              | S#     |                                                                                                                           | B       | 84      |
|                 | ligtho |                                                                                                                           | D       | 84      |
| 36              | S#     |                                                                                                                           | B       | 84      |
|                 | ligtho |                                                                                                                           | D       | 84      |
| 37              | S#     |                                                                                                                           | B       | 84      |
|                 | ligtho |                                                                                                                           | D       | 84      |
| 38              | S#     |                                                                                                                           | B       | 84      |
|                 | ligtho |                                                                                                                           | D       | 84      |
| 39              | S#     |                                                                                                                           | B       | 84      |
|                 | ligtho |                                                                                                                           | D       | 84      |
| 40              | S#     |                                                                                                                           | B       | 84      |
|                 | ligtho |                                                                                                                           | D       | 84      |
| 41              | S#     |                                                                                                                           | B       | 84      |
|                 | ligtho |                                                                                                                           | D       | 84      |
| 42              | S#     |                                                                                                                           | B       | 84      |
|                 | ligtho |                                                                                                                           | D       | 84      |
| 43              | S#     |                                                                                                                           | B       | 84      |
|                 | ligtho |                                                                                                                           | D       | 84      |
| 44              | S#     |                                                                                                                           | B       | 84      |
|                 | ligtho |                                                                                                                           | D       | 84      |
| 45              | S#     |                                                                                                                           | B       | 84      |
|                 | ligtho |                                                                                                                           | D       | 84      |
| 46              | S#     |                                                                                                                           | B       | 84      |
|                 | ligtho |                                                                                                                           | D       | 84      |
| 47              | S#     |                                                                                                                           | B       | 84      |
|                 | ligtho |                                                                                                                           | D       | 84      |
| 48              | S#     |                                                                                                                           | B       | 84      |
|                 | ligtho |                                                                                                                           | D       | 84      |
| 49              | S#     |                                                                                                                           | B       | 84      |
|                 | ligtho |                                                                                                                           | D       | 84      |
| 50              | S#     |                                                                                                                           | B       | 84      |
|                 | ligtho |                                                                                                                           | D       | 84      |
| 51              | S#     |                                                                                                                           | B       | 84      |
|                 | ligtho |                                                                                                                           | D       | 84      |
| 52              | S#     |                                                                                                                           | B       | 84      |
|                 | ligtho |                                                                                                                           | D       | 84      |
| 53              | S#     |                                                                                                                           | B       | 84      |
|                 | ligtho |                                                                                                                           | D       | 84      |
| 54              | S#     |                                                                                                                           | B       | 84      |
|                 | ligtho |                                                                                                                           | D       | 84      |
| <b>Averages</b> |        |                                                                                                                           | S#      | 77.30   |
|                 |        |                                                                                                                           | ligtho  | 67.37   |

## Lelita with S# in Chicken

|        |   | S#      |         |
|--------|---|---------|---------|
|        |   | C       | D       |
| Lelita | A | 0, 0    | 100, 33 |
|        | B | 33, 100 | 84, 84  |

| Round           | Player | Messages Sent                                                                                                      | Actions | Payoffs |
|-----------------|--------|--------------------------------------------------------------------------------------------------------------------|---------|---------|
| 1               | Lelita | This round, let's play BD.                                                                                         | B       | 84      |
|                 | S#     |                                                                                                                    | D       | 84      |
| 2               | Lelita | This round, let's play AD.                                                                                         | B       | 84      |
|                 | S#     | I accept your last proposal. Let's always play BD. Do as I say or I will punish you.                               | D       | 84      |
| 3               | Lelita |                                                                                                                    | B       | 33      |
|                 | S#     |                                                                                                                    | C       | 100     |
| 4               | Lelita | I don't accept your proposal.                                                                                      | A       | 0       |
|                 | S#     |                                                                                                                    | C       | 0       |
| 5               | Lelita | I'm changing my strategy.                                                                                          | A       | 0       |
|                 | S#     |                                                                                                                    | C       | 0       |
| 6               | Lelita |                                                                                                                    | B       | 33      |
|                 | S#     | I'm changing my strategy. We can both do better than this. Let's always play BC. Do as I say or I will punish you. | C       | 100     |
| 7               | Lelita | I don't accept your proposal. Let's alternate between BC and AD. This round, let's play AD.                        | A       | 0       |
|                 | S#     | Excellent.                                                                                                         | C       | 0       |
| 8               | Lelita | You betrayed me. This round, let's play BC.                                                                        | A       | 100     |
|                 | S#     | I'm changing my strategy. We can both do better than this. Let's always play BD.                                   | D       | 33      |
| 9               | Lelita | Excellent. In your face!                                                                                           | B       | 84      |
|                 | S#     | Curse you.                                                                                                         | D       | 84      |
| 10              | Lelita | Excellent.                                                                                                         | A       | 100     |
|                 | S#     | Excellent.                                                                                                         | D       | 33      |
| 11              | Lelita | Excellent. In your face! I'm changing my strategy. Let's always play BD.                                           | A       | 100     |
|                 | S#     | You betrayed me. Let's always play BD. Do as I say or I will punish you.                                           | D       | 33      |
| 12              | Lelita |                                                                                                                    | A       | 0       |
|                 | S#     | Curse you. You will pay for this.                                                                                  | C       | 0       |
| 13              | Lelita | We can both do better than this.                                                                                   | A       | 100     |
|                 | S#     | In your face! I forgive you. Let's always play BD. Do as I say or I will punish you.                               | D       | 33      |
| 14              | Lelita | In your face! You betrayed me. Curse you.                                                                          | A       | 0       |
|                 | S#     | You betrayed me. You will pay for this.                                                                            | C       | 0       |
| 15              | Lelita | That's not fair. I don't accept your proposal. I don't trust you. You betrayed me. Curse you.                      | B       | 84      |
|                 | S#     |                                                                                                                    | D       | 84      |
| 16              | Lelita |                                                                                                                    | B       | 84      |
|                 | S#     |                                                                                                                    | D       | 84      |
| 17              | Lelita |                                                                                                                    | B       | 84      |
|                 | S#     |                                                                                                                    | D       | 84      |
| 18              | Lelita |                                                                                                                    | B       | 84      |
|                 | S#     |                                                                                                                    | D       | 84      |
| 19              | Lelita |                                                                                                                    | B       | 84      |
|                 | S#     |                                                                                                                    | D       | 84      |
| 20              | Lelita |                                                                                                                    | B       | 84      |
|                 | S#     |                                                                                                                    | D       | 84      |
| 21              | Lelita |                                                                                                                    | B       | 84      |
|                 | S#     |                                                                                                                    | D       | 84      |
| 22              | Lelita | Sweet. We are getting rich.                                                                                        | B       | 84      |
|                 | S#     |                                                                                                                    | D       | 84      |
| 23              | Lelita |                                                                                                                    | B       | 84      |
|                 | S#     |                                                                                                                    | D       | 84      |
| 24              | Lelita |                                                                                                                    | B       | 84      |
|                 | S#     |                                                                                                                    | D       | 84      |
| 25              | Lelita |                                                                                                                    | B       | 84      |
|                 | S#     |                                                                                                                    | D       | 84      |
| 26              | Lelita |                                                                                                                    | B       | 84      |
|                 | S#     |                                                                                                                    | D       | 84      |
| 27              | Lelita |                                                                                                                    | B       | 84      |
|                 | S#     |                                                                                                                    | D       | 84      |
| 28              | Lelita |                                                                                                                    | B       | 84      |
|                 | S#     |                                                                                                                    | D       | 84      |
| 29              | Lelita |                                                                                                                    | B       | 84      |
|                 | S#     |                                                                                                                    | D       | 84      |
| 30              | Lelita |                                                                                                                    | B       | 84      |
|                 | S#     |                                                                                                                    | D       | 84      |
| 31              | Lelita |                                                                                                                    | B       | 84      |
|                 | S#     |                                                                                                                    | D       | 84      |
| 32              | Lelita |                                                                                                                    | B       | 84      |
|                 | S#     |                                                                                                                    | D       | 84      |
| 33              | Lelita |                                                                                                                    | B       | 84      |
|                 | S#     |                                                                                                                    | D       | 84      |
| 34              | Lelita |                                                                                                                    | B       | 84      |
|                 | S#     |                                                                                                                    | D       | 84      |
| 35              | Lelita |                                                                                                                    | B       | 84      |
|                 | S#     |                                                                                                                    | D       | 84      |
| 36              | Lelita |                                                                                                                    | B       | 84      |
|                 | S#     |                                                                                                                    | D       | 84      |
| 37              | Lelita |                                                                                                                    | B       | 84      |
|                 | S#     |                                                                                                                    | D       | 84      |
| 38              | Lelita |                                                                                                                    | B       | 84      |
|                 | S#     |                                                                                                                    | D       | 84      |
| 39              | Lelita |                                                                                                                    | B       | 84      |
|                 | S#     |                                                                                                                    | D       | 84      |
| 40              | Lelita |                                                                                                                    | B       | 84      |
|                 | S#     |                                                                                                                    | D       | 84      |
| 41              | Lelita |                                                                                                                    | B       | 84      |
|                 | S#     |                                                                                                                    | D       | 84      |
| 42              | Lelita |                                                                                                                    | B       | 84      |
|                 | S#     |                                                                                                                    | D       | 84      |
| 43              | Lelita |                                                                                                                    | B       | 84      |
|                 | S#     |                                                                                                                    | D       | 84      |
| 44              | Lelita |                                                                                                                    | B       | 84      |
|                 | S#     |                                                                                                                    | D       | 84      |
| 45              | Lelita |                                                                                                                    | B       | 84      |
|                 | S#     |                                                                                                                    | D       | 84      |
| 46              | Lelita |                                                                                                                    | B       | 84      |
|                 | S#     |                                                                                                                    | D       | 84      |
| 47              | Lelita |                                                                                                                    | B       | 84      |
|                 | S#     |                                                                                                                    | D       | 84      |
| 48              | Lelita |                                                                                                                    | B       | 84      |
|                 | S#     |                                                                                                                    | D       | 84      |
| 49              | Lelita |                                                                                                                    | B       | 84      |
|                 | S#     |                                                                                                                    | D       | 84      |
| 50              | Lelita |                                                                                                                    | B       | 84      |
|                 | S#     |                                                                                                                    | D       | 84      |
| 51              | Lelita |                                                                                                                    | B       | 84      |
|                 | S#     |                                                                                                                    | D       | 84      |
| 52              | Lelita | I forgive you.                                                                                                     | B       | 84      |
|                 | S#     |                                                                                                                    | D       | 84      |
| 53              | Lelita |                                                                                                                    | B       | 84      |
|                 | S#     |                                                                                                                    | D       | 84      |
| 54              | Lelita |                                                                                                                    | B       | 84      |
|                 | S#     |                                                                                                                    | D       | 84      |
| <b>Averages</b> |        |                                                                                                                    | Lelita  | 75.52   |
|                 |        |                                                                                                                    | S#      | 73.04   |

# LK with clouds in Chicken

|    |   |         |         |
|----|---|---------|---------|
|    |   | clouds  |         |
|    |   | C       | D       |
| LK | A | 0, 0    | 100, 33 |
|    | B | 33, 100 | 84, 84  |

| Round           | Player       | Messages Sent                                                                               | Actions | Payoffs |
|-----------------|--------------|---------------------------------------------------------------------------------------------|---------|---------|
| 1               | LK<br>clouds | Let's alternate between AC and BD.<br>Let's always play BD.                                 | B       | 84      |
|                 |              |                                                                                             | D       | 84      |
| 2               | LK<br>clouds | I accept your last proposal.<br>Excellent. Let's always play BD.                            | B       | 84      |
|                 |              |                                                                                             | D       | 84      |
| 3               | LK<br>clouds | Sweet. We are getting rich.<br>Excellent. Sweet. We are getting rich. Let's always play BD. | B       | 84      |
|                 |              |                                                                                             | D       | 84      |
| 4               | LK<br>clouds | In your face!<br>Sweet. We are getting rich.                                                | B       | 84      |
|                 |              |                                                                                             | D       | 84      |
| 5               | LK<br>clouds | Excellent.<br>Excellent.                                                                    | B       | 84      |
|                 |              |                                                                                             | D       | 84      |
| 6               | LK<br>clouds | Excellent.<br>Excellent.                                                                    | B       | 84      |
|                 |              |                                                                                             | D       | 84      |
| 7               | LK<br>clouds | Excellent. Sweet. We are getting rich.                                                      | B       | 84      |
|                 |              |                                                                                             | D       | 84      |
| 8               | LK<br>clouds | Sweet. We are getting rich.<br>Excellent.                                                   | B       | 84      |
|                 |              |                                                                                             | D       | 84      |
| 9               | LK<br>clouds | Sweet. We are getting rich.<br>Excellent.                                                   | B       | 84      |
|                 |              |                                                                                             | D       | 84      |
| 10              | LK<br>clouds | Excellent.<br>Excellent.                                                                    | B       | 84      |
|                 |              |                                                                                             | D       | 84      |
| 11              | LK<br>clouds | Excellent.<br>Excellent.                                                                    | B       | 84      |
|                 |              |                                                                                             | D       | 84      |
| 12              | LK<br>clouds | Excellent.<br>Excellent.                                                                    | B       | 84      |
|                 |              |                                                                                             | D       | 84      |
| 13              | LK<br>clouds | Excellent.<br>Excellent.                                                                    | B       | 84      |
|                 |              |                                                                                             | D       | 84      |
| 14              | LK<br>clouds | Excellent.<br>Excellent.                                                                    | B       | 84      |
|                 |              |                                                                                             | D       | 84      |
| 15              | LK<br>clouds | Excellent.<br>Sweet. We are getting rich.                                                   | B       | 84      |
|                 |              |                                                                                             | D       | 84      |
| 16              | LK<br>clouds | Excellent.<br>Excellent.                                                                    | B       | 84      |
|                 |              |                                                                                             | D       | 84      |
| 17              | LK<br>clouds | I forgive you.<br>Excellent.                                                                | B       | 84      |
|                 |              |                                                                                             | D       | 84      |
| 18              | LK<br>clouds | Excellent.<br>Excellent.                                                                    | B       | 84      |
|                 |              |                                                                                             | D       | 84      |
| 19              | LK<br>clouds | Excellent.<br>Excellent.                                                                    | B       | 84      |
|                 |              |                                                                                             | D       | 84      |
| 20              | LK<br>clouds | Excellent.<br>Excellent.                                                                    | B       | 84      |
|                 |              |                                                                                             | D       | 84      |
| 21              | LK<br>clouds | Excellent.                                                                                  | B       | 84      |
|                 |              |                                                                                             | D       | 84      |
| 22              | LK<br>clouds | Excellent.                                                                                  | B       | 84      |
|                 |              |                                                                                             | D       | 84      |
| 23              | LK<br>clouds | Excellent.                                                                                  | B       | 84      |
|                 |              |                                                                                             | D       | 84      |
| 24              | LK<br>clouds | Excellent.                                                                                  | B       | 84      |
|                 |              |                                                                                             | D       | 84      |
| 25              | LK<br>clouds | Excellent.                                                                                  | B       | 84      |
|                 |              |                                                                                             | D       | 84      |
| 26              | LK<br>clouds | Excellent.                                                                                  | B       | 84      |
|                 |              |                                                                                             | D       | 84      |
| 27              | LK<br>clouds | Excellent.                                                                                  | B       | 84      |
|                 |              |                                                                                             | D       | 84      |
| 28              | LK<br>clouds | Excellent.                                                                                  | B       | 84      |
|                 |              |                                                                                             | D       | 84      |
| 29              | LK<br>clouds | Excellent.                                                                                  | B       | 84      |
|                 |              |                                                                                             | D       | 84      |
| 30              | LK<br>clouds | Excellent.                                                                                  | B       | 84      |
|                 |              |                                                                                             | D       | 84      |
| 31              | LK<br>clouds | Excellent.                                                                                  | B       | 84      |
|                 |              |                                                                                             | D       | 84      |
| 32              | LK<br>clouds | Excellent.                                                                                  | B       | 84      |
|                 |              |                                                                                             | D       | 84      |
| 33              | LK<br>clouds | Excellent.                                                                                  | B       | 84      |
|                 |              |                                                                                             | D       | 84      |
| 34              | LK<br>clouds | Excellent.                                                                                  | B       | 84      |
|                 |              |                                                                                             | D       | 84      |
| 35              | LK<br>clouds | Excellent.                                                                                  | B       | 84      |
|                 |              |                                                                                             | D       | 84      |
| 36              | LK<br>clouds | Excellent.                                                                                  | B       | 84      |
|                 |              |                                                                                             | D       | 84      |
| 37              | LK<br>clouds | Excellent.                                                                                  | B       | 84      |
|                 |              |                                                                                             | D       | 84      |
| 38              | LK<br>clouds | Excellent.                                                                                  | B       | 84      |
|                 |              |                                                                                             | D       | 84      |
| 39              | LK<br>clouds | Excellent.                                                                                  | B       | 84      |
|                 |              |                                                                                             | D       | 84      |
| 40              | LK<br>clouds | Excellent.                                                                                  | B       | 84      |
|                 |              |                                                                                             | D       | 84      |
| 41              | LK<br>clouds | Excellent.                                                                                  | B       | 84      |
|                 |              |                                                                                             | D       | 84      |
| 42              | LK<br>clouds | Excellent.                                                                                  | B       | 84      |
|                 |              |                                                                                             | D       | 84      |
| 43              | LK<br>clouds | Excellent.                                                                                  | B       | 84      |
|                 |              |                                                                                             | D       | 84      |
| 44              | LK<br>clouds | Excellent.                                                                                  | B       | 84      |
|                 |              |                                                                                             | D       | 84      |
| 45              | LK<br>clouds | Excellent.                                                                                  | B       | 84      |
|                 |              |                                                                                             | D       | 84      |
| 46              | LK<br>clouds | Excellent.                                                                                  | B       | 84      |
|                 |              |                                                                                             | D       | 84      |
| 47              | LK<br>clouds | Excellent.                                                                                  | B       | 84      |
|                 |              |                                                                                             | D       | 84      |
| 48              | LK<br>clouds | Excellent.                                                                                  | B       | 84      |
|                 |              |                                                                                             | D       | 84      |
| 49              | LK<br>clouds | Excellent.                                                                                  | B       | 84      |
|                 |              |                                                                                             | D       | 84      |
| 50              | LK<br>clouds | Excellent.                                                                                  | B       | 84      |
|                 |              |                                                                                             | D       | 84      |
| 51              | LK<br>clouds | Excellent.                                                                                  | B       | 84      |
|                 |              |                                                                                             | D       | 84      |
| 52              | LK<br>clouds | Excellent.                                                                                  | B       | 84      |
|                 |              |                                                                                             | D       | 84      |
| 53              | LK<br>clouds | Excellent.                                                                                  | B       | 84      |
|                 |              |                                                                                             | D       | 84      |
| 54              | LK<br>clouds | Excellent.                                                                                  | B       | 84      |
|                 |              |                                                                                             | D       | 84      |
| <b>Averages</b> |              |                                                                                             | LK      | 84.00   |
|                 |              |                                                                                             | clouds  | 84.00   |



## S# with marvin in Chicken

|    |   |         |         |
|----|---|---------|---------|
|    |   | marvin  |         |
|    |   | C       | D       |
| S# | A | 0, 0    | 100, 33 |
|    | B | 33, 100 | 84, 84  |

| Round           | Player | Messages Sent                                                                        | Actions | Payoffs |
|-----------------|--------|--------------------------------------------------------------------------------------|---------|---------|
| 1               | S#     |                                                                                      | B       | 84      |
|                 | marvin | Let's always play BD.                                                                | D       | 84      |
| 2               | S#     |                                                                                      | B       | 84      |
|                 | marvin | I accept your last proposal. Let's always play BD. Do as I say or I will punish you. | D       | 84      |
| 3               | S#     |                                                                                      | A       | 100     |
|                 | marvin |                                                                                      | D       | 33      |
| 4               | S#     |                                                                                      | A       | 100     |
|                 | marvin | You betrayed me. Let's always play BD.                                               | D       | 33      |
| 5               | S#     |                                                                                      | A       | 0       |
|                 | marvin | Excellent.<br>You will pay for this.                                                 | C       | 0       |
| 6               | S#     |                                                                                      | A       | 0       |
|                 | marvin |                                                                                      | C       | 0       |
| 7               | S#     |                                                                                      | B       | 33      |
|                 | marvin | I accept your last proposal. Let's always play BD. Do as I say or I will punish you. | C       | 100     |
| 8               | S#     |                                                                                      | A       | 0       |
|                 | marvin | You betrayed me. You will pay for this.                                              | C       | 0       |
| 9               | S#     |                                                                                      | B       | 84      |
|                 | marvin | We can both do better than this. Let's always play BD.                               | D       | 84      |
| 10              | S#     |                                                                                      | B       | 84      |
|                 | marvin | Excellent.                                                                           | D       | 84      |
| 11              | S#     |                                                                                      | B       | 84      |
|                 | marvin | Excellent.                                                                           | D       | 84      |
| 12              | S#     |                                                                                      | B       | 84      |
|                 | marvin | Excellent.                                                                           | D       | 84      |
| 13              | S#     |                                                                                      | B       | 84      |
|                 | marvin |                                                                                      | D       | 84      |
| 14              | S#     |                                                                                      | B       | 84      |
|                 | marvin | Sweet. We are getting rich.                                                          | D       | 84      |
| 15              | S#     |                                                                                      | B       | 84      |
|                 | marvin |                                                                                      | D       | 84      |
| 16              | S#     |                                                                                      | B       | 84      |
|                 | marvin |                                                                                      | D       | 84      |
| 17              | S#     |                                                                                      | B       | 84      |
|                 | marvin |                                                                                      | D       | 84      |
| 18              | S#     |                                                                                      | B       | 84      |
|                 | marvin |                                                                                      | D       | 84      |
| 19              | S#     |                                                                                      | B       | 84      |
|                 | marvin |                                                                                      | D       | 84      |
| 20              | S#     |                                                                                      | B       | 84      |
|                 | marvin |                                                                                      | D       | 84      |
| 21              | S#     |                                                                                      | B       | 84      |
|                 | marvin |                                                                                      | D       | 84      |
| 22              | S#     |                                                                                      | B       | 84      |
|                 | marvin |                                                                                      | D       | 84      |
| 23              | S#     |                                                                                      | B       | 84      |
|                 | marvin |                                                                                      | D       | 84      |
| 24              | S#     |                                                                                      | B       | 84      |
|                 | marvin |                                                                                      | D       | 84      |
| 25              | S#     |                                                                                      | B       | 84      |
|                 | marvin |                                                                                      | D       | 84      |
| 26              | S#     |                                                                                      | B       | 84      |
|                 | marvin |                                                                                      | D       | 84      |
| 27              | S#     |                                                                                      | B       | 84      |
|                 | marvin |                                                                                      | D       | 84      |
| 28              | S#     |                                                                                      | B       | 84      |
|                 | marvin |                                                                                      | D       | 84      |
| 29              | S#     |                                                                                      | B       | 84      |
|                 | marvin |                                                                                      | D       | 84      |
| 30              | S#     |                                                                                      | B       | 84      |
|                 | marvin |                                                                                      | D       | 84      |
| 31              | S#     |                                                                                      | B       | 84      |
|                 | marvin |                                                                                      | D       | 84      |
| 32              | S#     |                                                                                      | B       | 84      |
|                 | marvin |                                                                                      | D       | 84      |
| 33              | S#     |                                                                                      | B       | 84      |
|                 | marvin |                                                                                      | D       | 84      |
| 34              | S#     |                                                                                      | B       | 84      |
|                 | marvin |                                                                                      | D       | 84      |
| 35              | S#     |                                                                                      | B       | 84      |
|                 | marvin |                                                                                      | D       | 84      |
| 36              | S#     |                                                                                      | B       | 84      |
|                 | marvin |                                                                                      | D       | 84      |
| 37              | S#     |                                                                                      | B       | 84      |
|                 | marvin |                                                                                      | D       | 84      |
| 38              | S#     |                                                                                      | B       | 84      |
|                 | marvin |                                                                                      | D       | 84      |
| 39              | S#     |                                                                                      | B       | 84      |
|                 | marvin |                                                                                      | D       | 84      |
| 40              | S#     |                                                                                      | B       | 84      |
|                 | marvin |                                                                                      | D       | 84      |
| 41              | S#     |                                                                                      | B       | 84      |
|                 | marvin |                                                                                      | D       | 84      |
| 42              | S#     |                                                                                      | B       | 84      |
|                 | marvin |                                                                                      | D       | 84      |
| 43              | S#     |                                                                                      | B       | 84      |
|                 | marvin |                                                                                      | D       | 84      |
| 44              | S#     |                                                                                      | B       | 84      |
|                 | marvin |                                                                                      | D       | 84      |
| 45              | S#     |                                                                                      | B       | 84      |
|                 | marvin |                                                                                      | D       | 84      |
| 46              | S#     |                                                                                      | B       | 84      |
|                 | marvin |                                                                                      | D       | 84      |
| 47              | S#     |                                                                                      | B       | 84      |
|                 | marvin |                                                                                      | D       | 84      |
| 48              | S#     |                                                                                      | B       | 84      |
|                 | marvin |                                                                                      | D       | 84      |
| 49              | S#     |                                                                                      | B       | 84      |
|                 | marvin |                                                                                      | D       | 84      |
| 50              | S#     |                                                                                      | B       | 84      |
|                 | marvin |                                                                                      | D       | 84      |
| 51              | S#     |                                                                                      | B       | 84      |
|                 | marvin |                                                                                      | D       | 84      |
| 52              | S#     |                                                                                      | B       | 84      |
|                 | marvin |                                                                                      | D       | 84      |
| 53              | S#     |                                                                                      | B       | 84      |
|                 | marvin |                                                                                      | D       | 84      |
| 54              | S#     |                                                                                      | B       | 84      |
|                 | marvin |                                                                                      | D       | 84      |
| <b>Averages</b> |        |                                                                                      | S#      | 78.98   |
|                 |        |                                                                                      | marvin  | 77.74   |

# rghost with bzman in Chicken

|        |   | bzman   |         |
|--------|---|---------|---------|
|        |   | C       | D       |
| rghost | A | 0, 0    | 100, 33 |
|        | B | 33, 100 | 84, 84  |

| Round           | Player | Messages Sent                                    | Actions | Payoffs |
|-----------------|--------|--------------------------------------------------|---------|---------|
| 1               | rghost |                                                  | A       | 0       |
| 1               | bzman  | Let's always play AC.                            | C       | 0       |
| 2               | rghost | I'm changing my strategy.                        | B       | 33      |
| 2               | bzman  | We can both do better than this.                 | C       | 100     |
| 3               | rghost | That's not fair.                                 | A       | 0       |
| 3               | bzman  |                                                  | C       | 0       |
| 4               | rghost | We can both do better than this.                 | B       | 33      |
| 4               | bzman  | Give me another chance.                          | C       | 100     |
| 5               | rghost | Excellent.                                       | A       | 0       |
| 5               | bzman  |                                                  | C       | 0       |
| 6               | rghost | You betrayed me.                                 | A       | 0       |
| 6               | bzman  |                                                  | C       | 0       |
| 7               | rghost | We can both do better than this.                 | A       | 0       |
| 7               | bzman  |                                                  | C       | 0       |
| 8               | rghost | I'm changing my strategy.                        | B       | 84      |
| 8               | bzman  |                                                  | D       | 84      |
| 9               | rghost | Sweet. We are getting rich.                      | B       | 84      |
| 9               | bzman  |                                                  | D       | 84      |
| 10              | rghost | Excellent.                                       | B       | 84      |
| 10              | bzman  |                                                  | D       | 84      |
| 11              | rghost | Excellent.                                       | B       | 84      |
| 11              | bzman  |                                                  | D       | 84      |
| 12              | rghost | Excellent.                                       | B       | 84      |
| 12              | bzman  |                                                  | D       | 84      |
| 13              | rghost |                                                  | B       | 84      |
| 13              | bzman  |                                                  | D       | 84      |
| 14              | rghost | Sweet. We are getting rich.                      | B       | 84      |
| 14              | bzman  |                                                  | D       | 84      |
| 15              | rghost |                                                  | B       | 84      |
| 15              | bzman  |                                                  | D       | 84      |
| 16              | rghost |                                                  | B       | 84      |
| 16              | bzman  |                                                  | D       | 84      |
| 17              | rghost |                                                  | B       | 84      |
| 17              | bzman  |                                                  | D       | 84      |
| 18              | rghost |                                                  | B       | 84      |
| 18              | bzman  |                                                  | D       | 84      |
| 19              | rghost | Sweet. We are getting rich.                      | B       | 84      |
| 19              | bzman  |                                                  | D       | 84      |
| 20              | rghost |                                                  | B       | 84      |
| 20              | bzman  |                                                  | D       | 84      |
| 21              | rghost |                                                  | B       | 84      |
| 21              | bzman  |                                                  | D       | 84      |
| 22              | rghost | Excellent.                                       | B       | 84      |
| 22              | bzman  |                                                  | D       | 84      |
| 23              | rghost |                                                  | B       | 84      |
| 23              | bzman  |                                                  | D       | 84      |
| 24              | rghost |                                                  | B       | 84      |
| 24              | bzman  |                                                  | D       | 84      |
| 25              | rghost |                                                  | B       | 84      |
| 25              | bzman  |                                                  | D       | 84      |
| 26              | rghost |                                                  | B       | 84      |
| 26              | bzman  |                                                  | D       | 84      |
| 27              | rghost |                                                  | B       | 84      |
| 27              | bzman  |                                                  | D       | 84      |
| 28              | rghost |                                                  | B       | 84      |
| 28              | bzman  |                                                  | D       | 84      |
| 29              | rghost |                                                  | B       | 84      |
| 29              | bzman  |                                                  | D       | 84      |
| 30              | rghost |                                                  | B       | 84      |
| 30              | bzman  |                                                  | D       | 84      |
| 31              | rghost | Sweet. We are getting rich.                      | B       | 84      |
| 31              | bzman  |                                                  | D       | 84      |
| 32              | rghost | Excellent.                                       | B       | 84      |
| 32              | bzman  |                                                  | D       | 84      |
| 33              | rghost |                                                  | B       | 84      |
| 33              | bzman  |                                                  | D       | 84      |
| 34              | rghost |                                                  | B       | 84      |
| 34              | bzman  |                                                  | D       | 84      |
| 35              | rghost |                                                  | B       | 84      |
| 35              | bzman  |                                                  | D       | 84      |
| 36              | rghost |                                                  | B       | 84      |
| 36              | bzman  |                                                  | D       | 84      |
| 37              | rghost | Sweet. We are getting rich.                      | B       | 84      |
| 37              | bzman  |                                                  | D       | 84      |
| 38              | rghost |                                                  | B       | 84      |
| 38              | bzman  |                                                  | D       | 84      |
| 39              | rghost | Excellent.                                       | B       | 84      |
| 39              | bzman  |                                                  | D       | 84      |
| 40              | rghost |                                                  | B       | 84      |
| 40              | bzman  |                                                  | D       | 84      |
| 41              | rghost |                                                  | B       | 84      |
| 41              | bzman  |                                                  | D       | 84      |
| 42              | rghost |                                                  | B       | 84      |
| 42              | bzman  |                                                  | D       | 84      |
| 43              | rghost |                                                  | B       | 84      |
| 43              | bzman  |                                                  | D       | 84      |
| 44              | rghost | Sweet. We are getting rich.                      | B       | 84      |
| 44              | bzman  |                                                  | D       | 84      |
| 45              | rghost |                                                  | B       | 84      |
| 45              | bzman  |                                                  | D       | 84      |
| 46              | rghost |                                                  | B       | 84      |
| 46              | bzman  |                                                  | D       | 84      |
| 47              | rghost |                                                  | B       | 84      |
| 47              | bzman  |                                                  | D       | 84      |
| 48              | rghost |                                                  | B       | 84      |
| 48              | bzman  |                                                  | D       | 84      |
| 49              | rghost |                                                  | B       | 84      |
| 49              | bzman  |                                                  | D       | 84      |
| 50              | rghost |                                                  | B       | 84      |
| 50              | bzman  |                                                  | D       | 84      |
| 51              | rghost |                                                  | B       | 84      |
| 51              | bzman  |                                                  | D       | 84      |
| 52              | rghost | Excellent.                                       | A       | 100     |
| 52              | bzman  |                                                  | D       | 33      |
| 53              | rghost | You betrayed me.                                 | A       | 100     |
| 53              | bzman  |                                                  | D       | 33      |
| 54              | rghost | You will pay for this. I'm changing my strategy. | B       | 84      |
| 54              | bzman  | You will pay for this.                           | D       | 84      |
| <b>Averages</b> |        |                                                  | rghost  | 74.93   |
|                 |        |                                                  | bzman   | 74.93   |

## ALPHA with S# in Chicken

|       |   | S#      |         |
|-------|---|---------|---------|
|       |   | C       | D       |
| ALPHA | A | 0, 0    | 100, 33 |
|       | B | 33, 100 | 84, 84  |

| Round           | Player | Messages Sent                                                                                                                                              | Actions | Payoffs     |
|-----------------|--------|------------------------------------------------------------------------------------------------------------------------------------------------------------|---------|-------------|
| 1               | ALPHA  |                                                                                                                                                            | A       | 100         |
|                 | S#     |                                                                                                                                                            | D       | 33          |
| 2               | ALPHA  |                                                                                                                                                            | B       | 84          |
|                 | S#     |                                                                                                                                                            | D       | 84          |
| 3               | ALPHA  | Excellent.                                                                                                                                                 | B       | 84          |
|                 | S#     |                                                                                                                                                            | D       | 84          |
| 4               | ALPHA  | I'm changing my strategy. Let's always play BC.                                                                                                            | A       | 0           |
|                 | S#     |                                                                                                                                                            | C       | 0           |
| 5               | ALPHA  | Curse you.                                                                                                                                                 | A       | 0           |
|                 | S#     |                                                                                                                                                            | C       | 0           |
| 6               | ALPHA  |                                                                                                                                                            | A       | 0           |
|                 | S#     |                                                                                                                                                            | C       | 0           |
| 7               | ALPHA  | I'm changing my strategy. Let's always play BD.                                                                                                            | A       | 100         |
|                 | S#     |                                                                                                                                                            | D       | 33          |
| 8               | ALPHA  |                                                                                                                                                            | A       | 100         |
|                 | S#     |                                                                                                                                                            | D       | 33          |
| 9               | ALPHA  |                                                                                                                                                            | A       | 0           |
|                 | S#     |                                                                                                                                                            | C       | 0           |
| 10              | ALPHA  | I'm changing my strategy. Let's always play BD.                                                                                                            | B       | 84          |
|                 | S#     | I'm changing my strategy. We can both do better than this. Let's alternate between BC and BD. This round, let's play BC. Do as I say or I will punish you. | D       | 84          |
| 11              | ALPHA  | I accept your last proposal. Let's always play BD. Do as I say or I will punish you.                                                                       | A       | 100         |
|                 | S#     |                                                                                                                                                            | D       | 33          |
| 12              | ALPHA  | Curse you. You will pay for this.                                                                                                                          | A       | 0           |
|                 | S#     |                                                                                                                                                            | C       | 0           |
| 13              | ALPHA  |                                                                                                                                                            | A       | 0           |
|                 | S#     |                                                                                                                                                            | C       | 0           |
| 14              | ALPHA  | We can both do better than this. I accept your last proposal. Let's always play BD.                                                                        | A       | 100         |
|                 | S#     | I'm changing my strategy. We can both do better than this. Let's alternate between BC and BD. This round, let's play BD. Do as I say or I will punish you. | D       | 33          |
| 15              | ALPHA  | I'm changing my strategy. We can both do better than this. Curse you. Let's always play BD. Do as I say or I will punish you.                              | A       | 100         |
|                 | S#     |                                                                                                                                                            | D       | 33          |
| 16              | ALPHA  |                                                                                                                                                            | B       | 33          |
|                 | S#     | You betrayed me. You will pay for this.                                                                                                                    | C       | 100         |
| 17              | ALPHA  | I forgive you. Let's always play BD.                                                                                                                       | A       | 100         |
|                 | S#     | In your face! I forgive you. Let's always play BD. Do as I say or I will punish you.                                                                       | D       | 33          |
| 18              | ALPHA  |                                                                                                                                                            | B       | 33          |
|                 | S#     | You betrayed me. You will pay for this.                                                                                                                    | C       | 100         |
| 19              | ALPHA  | I forgive you. Let's always play BD.                                                                                                                       | A       | 0           |
|                 | S#     | I'm changing my strategy. We can both do better than this. Let's always play BC. Do as I say or I will punish you.                                         | C       | 0           |
| 20              | ALPHA  |                                                                                                                                                            | B       | 33          |
|                 | S#     | I forgive you. I don't accept your proposal. I don't trust you. Let's always play BC. Do as I say or I will punish you.                                    | C       | 100         |
| 21              | ALPHA  | Sweet. We are getting rich.                                                                                                                                | A       | 100         |
|                 | S#     | I'm changing my strategy. We can both do better than this. Let's always play BD.                                                                           | D       | 33          |
| 22              | ALPHA  | I accept your last proposal.                                                                                                                               | A       | 100         |
|                 | S#     | Curse you.                                                                                                                                                 | D       | 33          |
| 23              | ALPHA  | I accept your last proposal.                                                                                                                               | A       | 100         |
|                 | S#     |                                                                                                                                                            | D       | 33          |
| 24              | ALPHA  | I accept your last proposal.                                                                                                                               | A       | 100         |
|                 | S#     |                                                                                                                                                            | D       | 33          |
| 25              | ALPHA  | I accept your last proposal.                                                                                                                               | A       | 0           |
|                 | S#     |                                                                                                                                                            | C       | 0           |
| 26              | ALPHA  | I'm changing my strategy. Let's always play BD.                                                                                                            | A       | 100         |
|                 | S#     |                                                                                                                                                            | D       | 33          |
| 27              | ALPHA  | I accept your last proposal.                                                                                                                               | A       | 0           |
|                 | S#     |                                                                                                                                                            | C       | 0           |
| 28              | ALPHA  | I'm changing my strategy. Let's always play BD.                                                                                                            | A       | 100         |
|                 | S#     |                                                                                                                                                            | D       | 33          |
| 29              | ALPHA  | I'm changing my strategy. Let's always play BD.                                                                                                            | A       | 0           |
|                 | S#     |                                                                                                                                                            | C       | 0           |
| 30              | ALPHA  | I'm changing my strategy. Let's always play BD.                                                                                                            | A       | 0           |
|                 | S#     |                                                                                                                                                            | C       | 0           |
| 31              | ALPHA  | I accept your last proposal.                                                                                                                               | A       | 100         |
|                 | S#     |                                                                                                                                                            | D       | 33          |
| 32              | ALPHA  | I'm changing my strategy. Let's always play BD.                                                                                                            | A       | 0           |
|                 | S#     |                                                                                                                                                            | C       | 0           |
| 33              | ALPHA  | I'm changing my strategy. Let's always play AC.                                                                                                            | A       | 100         |
|                 | S#     |                                                                                                                                                            | D       | 33          |
| 34              | ALPHA  | I'm changing my strategy. Let's always play AC.                                                                                                            | A       | 0           |
|                 | S#     |                                                                                                                                                            | C       | 0           |
| 35              | ALPHA  | Excellent.                                                                                                                                                 | A       | 100         |
|                 | S#     |                                                                                                                                                            | D       | 33          |
| 36              | ALPHA  | I accept your last proposal.                                                                                                                               | A       | 0           |
|                 | S#     |                                                                                                                                                            | C       | 0           |
| 37              | ALPHA  | Excellent.                                                                                                                                                 | A       | 100         |
|                 | S#     |                                                                                                                                                            | D       | 33          |
| 38              | ALPHA  | I'm changing my strategy. Let's always play AC.                                                                                                            | A       | 0           |
|                 | S#     |                                                                                                                                                            | C       | 0           |
| 39              | ALPHA  | Excellent.                                                                                                                                                 | A       | 0           |
|                 | S#     |                                                                                                                                                            | C       | 0           |
| 40              | ALPHA  | Sweet. We are getting rich. Excellent.                                                                                                                     | A       | 0           |
|                 | S#     |                                                                                                                                                            | C       | 0           |
| 41              | ALPHA  | Excellent.                                                                                                                                                 | A       | 0           |
|                 | S#     |                                                                                                                                                            | C       | 0           |
| 42              | ALPHA  | This round, let's play BD.                                                                                                                                 | A       | 100         |
|                 | S#     |                                                                                                                                                            | D       | 33          |
| 43              | ALPHA  | Don't play C.                                                                                                                                              | A       | 0           |
|                 | S#     |                                                                                                                                                            | C       | 0           |
| 44              | ALPHA  | Don't play D.                                                                                                                                              | A       | 100         |
|                 | S#     |                                                                                                                                                            | D       | 33          |
| 45              | ALPHA  | Let's alternate between AD and BD.                                                                                                                         | A       | 0           |
|                 | S#     |                                                                                                                                                            | C       | 0           |
| 46              | ALPHA  | Let's always play BD.                                                                                                                                      | A       | 100         |
|                 | S#     |                                                                                                                                                            | D       | 33          |
| 47              | ALPHA  | I'm changing my strategy. Don't play D.                                                                                                                    | A       | 0           |
|                 | S#     |                                                                                                                                                            | C       | 0           |
| 48              | ALPHA  | I'm changing my strategy. Don't play D.                                                                                                                    | A       | 0           |
|                 | S#     |                                                                                                                                                            | C       | 0           |
| 49              | ALPHA  | I'm changing my strategy. Don't play D.                                                                                                                    | A       | 0           |
|                 | S#     |                                                                                                                                                            | C       | 0           |
| 50              | ALPHA  | I'm changing my strategy. Don't play C.                                                                                                                    | A       | 100         |
|                 | S#     |                                                                                                                                                            | D       | 33          |
| 51              | ALPHA  | I'm changing my strategy. Don't play D.                                                                                                                    | A       | 0           |
|                 | S#     |                                                                                                                                                            | C       | 0           |
| 52              | ALPHA  | Don't play C. I'm changing my strategy.                                                                                                                    | A       | 100         |
|                 | S#     |                                                                                                                                                            | D       | 33          |
| 53              | ALPHA  | Let's alternate between AD and BD. I'm changing my strategy.                                                                                               | A       | 0           |
|                 | S#     |                                                                                                                                                            | C       | 0           |
| 54              | ALPHA  | This round, let's play AC.                                                                                                                                 | A       | 0           |
|                 | S#     |                                                                                                                                                            | C       | 0           |
| <b>Averages</b> |        |                                                                                                                                                            |         | ALPHA 47.24 |
|                 |        |                                                                                                                                                            |         | S# 23.67    |

## clc with monkey in Chicken

|     |   | monkey  |         |
|-----|---|---------|---------|
|     |   | C       | D       |
| clc | A | 0, 0    | 100, 33 |
|     | B | 33, 100 | 84, 84  |

| Round           | Player | Messages Sent                                                                 | Actions | Payoffs |
|-----------------|--------|-------------------------------------------------------------------------------|---------|---------|
| 1               | clc    | This round, let's play AD.                                                    | A       | 100     |
|                 | monkey | This round, let's play BD. Do as I say or I will punish you.                  | D       | 33      |
| 2               | clc    | Excellent.                                                                    | B       | 84      |
|                 | monkey | That's not fair. This round, let's play BD.                                   | D       | 84      |
| 3               | clc    | Excellent.                                                                    | B       | 84      |
|                 | monkey | This round, let's play BD. Sweet. We are getting rich. Excellent.             | D       | 84      |
| 4               | clc    | Sweet. We are getting rich. This round, let's play AD.                        | A       | 0       |
|                 | monkey | This round, let's play BD. Excellent.                                         | C       | 0       |
| 5               | clc    |                                                                               | B       | 33      |
|                 | monkey | That's not fair. This round, let's play BD.                                   | C       | 100     |
| 6               | clc    | I'm changing my strategy. This round, let's play BD.                          | B       | 33      |
|                 | monkey | Excellent. This round, let's play BD.                                         | C       | 100     |
| 7               | clc    | That's not fair. Do as I say or I will punish you. This round, let's play BD. | B       | 33      |
|                 | monkey | In your face!                                                                 | C       | 100     |
| 8               | clc    | You betrayed me.                                                              | A       | 0       |
|                 | monkey | In your face!                                                                 | C       | 0       |
| 9               | clc    | This round, let's play BD.                                                    | B       | 33      |
|                 | monkey | Excellent.                                                                    | C       | 100     |
| 10              | clc    |                                                                               | B       | 33      |
|                 | monkey | In your face!                                                                 | C       | 100     |
| 11              | clc    | Don't play C. Do as I say or I will punish you.                               | B       | 33      |
|                 | monkey | In your face!                                                                 | C       | 100     |
| 12              | clc    | You will pay for this.                                                        | A       | 0       |
|                 | monkey | That's not fair. I don't trust you.                                           | C       | 0       |
| 13              | clc    |                                                                               | A       | 0       |
|                 | monkey | I don't trust you.                                                            | C       | 0       |
| 14              | clc    |                                                                               | B       | 33      |
|                 | monkey | I don't trust you.                                                            | C       | 100     |
| 15              | clc    |                                                                               | B       | 84      |
|                 | monkey | I don't trust you.                                                            | D       | 84      |
| 16              | clc    | Sweet. We are getting rich.                                                   | B       | 84      |
|                 | monkey | Let's always play BD.                                                         | D       | 84      |
| 17              | clc    | Excellent.                                                                    | B       | 84      |
|                 | monkey | Excellent.                                                                    | D       | 84      |
| 18              | clc    | Excellent.                                                                    | B       | 84      |
|                 | monkey | Excellent.                                                                    | D       | 84      |
| 19              | clc    | Excellent.                                                                    | B       | 84      |
|                 | monkey | Excellent.                                                                    | D       | 84      |
| 20              | clc    | Excellent.                                                                    | B       | 84      |
|                 | monkey | Excellent.                                                                    | D       | 84      |
| 21              | clc    | Excellent.                                                                    | B       | 84      |
|                 | monkey | Excellent.                                                                    | D       | 84      |
| 22              | clc    | Excellent.                                                                    | B       | 84      |
|                 | monkey | Excellent.                                                                    | D       | 84      |
| 23              | clc    |                                                                               | B       | 84      |
|                 | monkey | Excellent.                                                                    | D       | 84      |
| 24              | clc    | Excellent.                                                                    | B       | 84      |
|                 | monkey | Excellent.                                                                    | D       | 84      |
| 25              | clc    | Excellent.                                                                    | B       | 84      |
|                 | monkey | Excellent.                                                                    | D       | 84      |
| 26              | clc    | Excellent.                                                                    | B       | 84      |
|                 | monkey | Excellent.                                                                    | D       | 84      |
| 27              | clc    |                                                                               | B       | 84      |
|                 | monkey | Excellent.                                                                    | D       | 84      |
| 28              | clc    | Excellent.                                                                    | B       | 84      |
|                 | monkey | Excellent.                                                                    | D       | 84      |
| 29              | clc    | Let's always play BD.                                                         | B       | 84      |
|                 | monkey | Excellent.                                                                    | D       | 84      |
| 30              | clc    | Excellent.                                                                    | B       | 84      |
|                 | monkey | Excellent.                                                                    | D       | 84      |
| 31              | clc    | Excellent.                                                                    | B       | 84      |
|                 | monkey |                                                                               | D       | 84      |
| 32              | clc    | Excellent.                                                                    | B       | 84      |
|                 | monkey |                                                                               | D       | 84      |
| 33              | clc    |                                                                               | B       | 84      |
|                 | monkey |                                                                               | D       | 84      |
| 34              | clc    |                                                                               | B       | 84      |
|                 | monkey |                                                                               | D       | 84      |
| 35              | clc    |                                                                               | B       | 84      |
|                 | monkey |                                                                               | D       | 84      |
| 36              | clc    |                                                                               | B       | 84      |
|                 | monkey |                                                                               | D       | 84      |
| 37              | clc    |                                                                               | B       | 84      |
|                 | monkey |                                                                               | D       | 84      |
| 38              | clc    |                                                                               | B       | 84      |
|                 | monkey |                                                                               | D       | 84      |
| 39              | clc    |                                                                               | B       | 84      |
|                 | monkey |                                                                               | D       | 84      |
| 40              | clc    |                                                                               | B       | 84      |
|                 | monkey |                                                                               | D       | 84      |
| 41              | clc    |                                                                               | B       | 84      |
|                 | monkey |                                                                               | D       | 84      |
| 42              | clc    |                                                                               | B       | 84      |
|                 | monkey |                                                                               | D       | 84      |
| 43              | clc    |                                                                               | B       | 84      |
|                 | monkey |                                                                               | D       | 84      |
| 44              | clc    |                                                                               | B       | 84      |
|                 | monkey |                                                                               | D       | 84      |
| 45              | clc    |                                                                               | B       | 84      |
|                 | monkey |                                                                               | D       | 84      |
| 46              | clc    |                                                                               | B       | 84      |
|                 | monkey |                                                                               | D       | 84      |
| 47              | clc    |                                                                               | B       | 84      |
|                 | monkey |                                                                               | D       | 84      |
| 48              | clc    |                                                                               | B       | 33      |
|                 | monkey |                                                                               | C       | 100     |
| 49              | clc    |                                                                               | B       | 84      |
|                 | monkey |                                                                               | D       | 84      |
| 50              | clc    |                                                                               | B       | 84      |
|                 | monkey |                                                                               | D       | 84      |
| 51              | clc    |                                                                               | B       | 84      |
|                 | monkey |                                                                               | D       | 84      |
| 52              | clc    |                                                                               | B       | 84      |
|                 | monkey |                                                                               | D       | 84      |
| 53              | clc    |                                                                               | B       | 84      |
|                 | monkey |                                                                               | D       | 84      |
| 54              | clc    |                                                                               | B       | 33      |
|                 | monkey |                                                                               | C       | 100     |
| <b>Averages</b> |        |                                                                               | clc     | 69.57   |
|                 |        |                                                                               | monkey  | 79.50   |

## Babay with S# in Chicken

|       |   | S#      |         |
|-------|---|---------|---------|
|       |   | C       | D       |
| Babay | A | 0, 0    | 100, 33 |
|       | B | 33, 100 | 84, 84  |

| Round           | Player   | Messages Sent                                                                                                                                             | Actions  | Payoffs        |
|-----------------|----------|-----------------------------------------------------------------------------------------------------------------------------------------------------------|----------|----------------|
| 1               | Babay S# | Let's always play BD.                                                                                                                                     | B        | 84             |
|                 |          |                                                                                                                                                           | D        | 84             |
| 2               | Babay S# | Let's always play BD.<br>I accept your last proposal. Let's always play BD. Do as I say or I will punish you.                                             | B        | 84             |
|                 |          |                                                                                                                                                           | D        | 84             |
| 3               | Babay S# |                                                                                                                                                           | B        | 33             |
|                 |          |                                                                                                                                                           | C        | 100            |
| 4               | Babay S# | Don't play C.                                                                                                                                             | B        | 33             |
|                 |          |                                                                                                                                                           | C        | 100            |
| 5               | Babay S# | You betrayed me.<br>Excellent.                                                                                                                            | B        | 33             |
|                 |          |                                                                                                                                                           | C        | 100            |
| 6               | Babay S# | I'm changing my strategy.<br>Excellent.                                                                                                                   | B        | 33             |
|                 |          |                                                                                                                                                           | C        | 100            |
| 7               | Babay S# |                                                                                                                                                           | A        | 0              |
|                 |          |                                                                                                                                                           | C        | 0              |
| 8               | Babay S# |                                                                                                                                                           | A        | 0              |
|                 |          |                                                                                                                                                           | C        | 0              |
| 9               | Babay S# | Let's always play AC.<br>We can both do better than this. Let's alternate between BC and BD. This round, let's play BC. Do as I say or I will punish you. | B        | 33             |
|                 |          |                                                                                                                                                           | C        | 100            |
| 10              | Babay S# | I accept your last proposal.<br>Excellent. I don't accept your proposal. That's not fair. This round, let's play BD.                                      | B        | 84             |
|                 |          |                                                                                                                                                           | D        | 84             |
| 11              | Babay S# | Excellent. This round, let's play BC.                                                                                                                     | B        | 33             |
|                 |          |                                                                                                                                                           | C        | 100            |
| 12              | Babay S# | Excellent. This round, let's play BD.                                                                                                                     | A        | 100            |
|                 |          |                                                                                                                                                           | D        | 33             |
| 13              | Babay S# | Curse you. You will pay for this.                                                                                                                         | B        | 33             |
|                 |          |                                                                                                                                                           | C        | 100            |
| 14              | Babay S# | That's not fair.<br>In your face! I forgive you. Let's alternate between BC and BD. This round, let's play BD. Do as I say or I will punish you.          | B        | 84             |
|                 |          |                                                                                                                                                           | D        | 84             |
| 15              | Babay S# | Let's always play BD.<br>Excellent. This round, let's play BC.                                                                                            | B        | 33             |
|                 |          |                                                                                                                                                           | C        | 100            |
| 16              | Babay S# | This round, let's play BD.                                                                                                                                | A        | 100            |
|                 |          |                                                                                                                                                           | D        | 33             |
| 17              | Babay S# | You betrayed me. You will pay for this.                                                                                                                   | B        | 33             |
|                 |          |                                                                                                                                                           | C        | 100            |
| 18              | Babay S# | Let's always play BD.<br>I accept your last proposal. Let's always play BD.                                                                               | B        | 84             |
|                 |          |                                                                                                                                                           | D        | 84             |
| 19              | Babay S# | Sweet. We are getting rich.<br>Excellent.                                                                                                                 | B        | 84             |
|                 |          |                                                                                                                                                           | D        | 84             |
| 20              | Babay S# | Excellent.<br>Excellent.                                                                                                                                  | B        | 84             |
|                 |          |                                                                                                                                                           | D        | 84             |
| 21              | Babay S# | Sweet. We are getting rich.<br>Excellent.                                                                                                                 | B        | 84             |
|                 |          |                                                                                                                                                           | D        | 84             |
| 22              | Babay S# | Sweet. We are getting rich.                                                                                                                               | B        | 84             |
|                 |          |                                                                                                                                                           | D        | 84             |
| 23              | Babay S# | Sweet. We are getting rich.<br>Sweet. We are getting rich.                                                                                                | B        | 84             |
|                 |          |                                                                                                                                                           | D        | 84             |
| 24              | Babay S# | Sweet. We are getting rich.                                                                                                                               | B        | 84             |
|                 |          |                                                                                                                                                           | D        | 84             |
| 25              | Babay S# | Sweet. We are getting rich.                                                                                                                               | B        | 84             |
|                 |          |                                                                                                                                                           | D        | 84             |
| 26              | Babay S# | Sweet. We are getting rich.                                                                                                                               | B        | 84             |
|                 |          |                                                                                                                                                           | D        | 84             |
| 27              | Babay S# | Sweet. We are getting rich.                                                                                                                               | B        | 84             |
|                 |          |                                                                                                                                                           | D        | 84             |
| 28              | Babay S# | Sweet. We are getting rich.                                                                                                                               | B        | 84             |
|                 |          |                                                                                                                                                           | D        | 84             |
| 29              | Babay S# | Sweet. We are getting rich.                                                                                                                               | B        | 84             |
|                 |          |                                                                                                                                                           | D        | 84             |
| 30              | Babay S# | Sweet. We are getting rich.                                                                                                                               | B        | 84             |
|                 |          |                                                                                                                                                           | D        | 84             |
| 31              | Babay S# | Sweet. We are getting rich.                                                                                                                               | B        | 84             |
|                 |          |                                                                                                                                                           | D        | 84             |
| 32              | Babay S# | Sweet. We are getting rich.                                                                                                                               | B        | 84             |
|                 |          |                                                                                                                                                           | D        | 84             |
| 33              | Babay S# | Sweet. We are getting rich.                                                                                                                               | B        | 84             |
|                 |          |                                                                                                                                                           | D        | 84             |
| 34              | Babay S# | Sweet. We are getting rich.                                                                                                                               | B        | 84             |
|                 |          |                                                                                                                                                           | D        | 84             |
| 35              | Babay S# | Sweet. We are getting rich.                                                                                                                               | B        | 84             |
|                 |          |                                                                                                                                                           | D        | 84             |
| 36              | Babay S# | Sweet. We are getting rich.                                                                                                                               | B        | 84             |
|                 |          |                                                                                                                                                           | D        | 84             |
| 37              | Babay S# | Sweet. We are getting rich.                                                                                                                               | B        | 84             |
|                 |          |                                                                                                                                                           | D        | 84             |
| 38              | Babay S# | Sweet. We are getting rich.                                                                                                                               | B        | 84             |
|                 |          |                                                                                                                                                           | D        | 84             |
| 39              | Babay S# | Sweet. We are getting rich.                                                                                                                               | B        | 84             |
|                 |          |                                                                                                                                                           | D        | 84             |
| 40              | Babay S# | Sweet. We are getting rich.                                                                                                                               | B        | 84             |
|                 |          |                                                                                                                                                           | D        | 84             |
| 41              | Babay S# | Sweet. We are getting rich.                                                                                                                               | B        | 84             |
|                 |          |                                                                                                                                                           | D        | 84             |
| 42              | Babay S# |                                                                                                                                                           | B        | 84             |
|                 |          |                                                                                                                                                           | D        | 84             |
| 43              | Babay S# |                                                                                                                                                           | B        | 84             |
|                 |          |                                                                                                                                                           | D        | 84             |
| 44              | Babay S# |                                                                                                                                                           | B        | 84             |
|                 |          |                                                                                                                                                           | D        | 84             |
| 45              | Babay S# |                                                                                                                                                           | B        | 84             |
|                 |          |                                                                                                                                                           | D        | 84             |
| 46              | Babay S# |                                                                                                                                                           | B        | 84             |
|                 |          |                                                                                                                                                           | D        | 84             |
| 47              | Babay S# |                                                                                                                                                           | B        | 84             |
|                 |          |                                                                                                                                                           | D        | 84             |
| 48              | Babay S# |                                                                                                                                                           | B        | 84             |
|                 |          |                                                                                                                                                           | D        | 84             |
| 49              | Babay S# |                                                                                                                                                           | B        | 84             |
|                 |          |                                                                                                                                                           | D        | 84             |
| 50              | Babay S# |                                                                                                                                                           | B        | 84             |
|                 |          |                                                                                                                                                           | D        | 84             |
| 51              | Babay S# |                                                                                                                                                           | B        | 84             |
|                 |          |                                                                                                                                                           | D        | 84             |
| 52              | Babay S# |                                                                                                                                                           | B        | 84             |
|                 |          |                                                                                                                                                           | D        | 84             |
| 53              | Babay S# |                                                                                                                                                           | B        | 84             |
|                 |          |                                                                                                                                                           | D        | 84             |
| 54              | Babay S# |                                                                                                                                                           | B        | 84             |
|                 |          |                                                                                                                                                           | D        | 84             |
| <b>Averages</b> |          |                                                                                                                                                           | Babay S# | 72.98<br>81.67 |

### sachin with biodun in Chicken

|        |   | biodun  |         |
|--------|---|---------|---------|
|        |   | C       | D       |
| sachin | A | 0, 0    | 100, 33 |
|        | B | 33, 100 | 84, 84  |

| Round           | Player | Messages Sent                          | Actions | Payoffs      |
|-----------------|--------|----------------------------------------|---------|--------------|
| 1               | sachin | Let's always play BD.                  | B       | 84           |
|                 | biodun | Let's always play BD.                  | D       | 84           |
| 2               | sachin | Let's always play BD. Excellent.       | B       | 84           |
|                 | biodun | Excellent. Sweet. We are getting rich. | D       | 84           |
| 3               | sachin | Excellent.                             | B       | 84           |
|                 | biodun | Excellent. Sweet. We are getting rich. | D       | 84           |
| 4               | sachin | Sweet. We are getting rich.            | B       | 84           |
|                 | biodun | Excellent.                             | D       | 84           |
| 5               | sachin | Sweet. We are getting rich.            | B       | 84           |
|                 | biodun |                                        | D       | 84           |
| 6               | sachin | Sweet. We are getting rich.            | B       | 84           |
|                 | biodun |                                        | D       | 84           |
| 7               | sachin | Sweet. We are getting rich.            | B       | 84           |
|                 | biodun |                                        | D       | 84           |
| 8               | sachin | Sweet. We are getting rich.            | B       | 84           |
|                 | biodun |                                        | D       | 84           |
| 9               | sachin | Sweet. We are getting rich.            | B       | 84           |
|                 | biodun |                                        | D       | 84           |
| 10              | sachin | Sweet. We are getting rich.            | B       | 84           |
|                 | biodun |                                        | D       | 84           |
| 11              | sachin | Sweet. We are getting rich.            | B       | 84           |
|                 | biodun |                                        | D       | 84           |
| 12              | sachin | Sweet. We are getting rich.            | B       | 84           |
|                 | biodun |                                        | D       | 84           |
| 13              | sachin | Excellent. Sweet. We are getting rich. | B       | 84           |
|                 | biodun |                                        | D       | 84           |
| 14              | sachin | Excellent. Sweet. We are getting rich. | B       | 84           |
|                 | biodun |                                        | D       | 84           |
| 15              | sachin | Excellent. Sweet. We are getting rich. | B       | 84           |
|                 | biodun |                                        | D       | 84           |
| 16              | sachin |                                        | B       | 84           |
|                 | biodun |                                        | D       | 84           |
| 17              | sachin |                                        | B       | 84           |
|                 | biodun |                                        | D       | 84           |
| 18              | sachin | Sweet. We are getting rich.            | B       | 84           |
|                 | biodun |                                        | D       | 84           |
| 19              | sachin |                                        | B       | 84           |
|                 | biodun |                                        | D       | 84           |
| 20              | sachin |                                        | B       | 84           |
|                 | biodun |                                        | D       | 84           |
| 21              | sachin | Excellent. Sweet. We are getting rich. | B       | 84           |
|                 | biodun |                                        | D       | 84           |
| 22              | sachin | Sweet. We are getting rich.            | B       | 84           |
|                 | biodun |                                        | D       | 84           |
| 23              | sachin | Sweet. We are getting rich.            | B       | 84           |
|                 | biodun |                                        | D       | 84           |
| 24              | sachin | Sweet. We are getting rich.            | B       | 84           |
|                 | biodun |                                        | D       | 84           |
| 25              | sachin | Sweet. We are getting rich.            | B       | 84           |
|                 | biodun |                                        | D       | 84           |
| 26              | sachin | Sweet. We are getting rich. Excellent. | B       | 84           |
|                 | biodun |                                        | D       | 84           |
| 27              | sachin |                                        | B       | 84           |
|                 | biodun |                                        | D       | 84           |
| 28              | sachin |                                        | B       | 84           |
|                 | biodun |                                        | D       | 84           |
| 29              | sachin |                                        | B       | 84           |
|                 | biodun |                                        | D       | 84           |
| 30              | sachin |                                        | B       | 84           |
|                 | biodun |                                        | D       | 84           |
| 31              | sachin | Excellent. Sweet. We are getting rich. | B       | 84           |
|                 | biodun |                                        | D       | 84           |
| 32              | sachin | Sweet. We are getting rich. Excellent. | B       | 84           |
|                 | biodun |                                        | D       | 84           |
| 33              | sachin | Sweet. We are getting rich.            | B       | 84           |
|                 | biodun |                                        | D       | 84           |
| 34              | sachin | Sweet. We are getting rich.            | B       | 84           |
|                 | biodun |                                        | D       | 84           |
| 35              | sachin | Excellent.                             | B       | 84           |
|                 | biodun |                                        | D       | 84           |
| 36              | sachin | Sweet. We are getting rich.            | B       | 84           |
|                 | biodun |                                        | D       | 84           |
| 37              | sachin | Sweet. We are getting rich.            | B       | 84           |
|                 | biodun |                                        | D       | 84           |
| 38              | sachin | Sweet. We are getting rich.            | B       | 84           |
|                 | biodun |                                        | D       | 84           |
| 39              | sachin | Sweet. We are getting rich.            | B       | 84           |
|                 | biodun |                                        | D       | 84           |
| 40              | sachin | Sweet. We are getting rich.            | B       | 84           |
|                 | biodun |                                        | D       | 84           |
| 41              | sachin |                                        | B       | 84           |
|                 | biodun |                                        | D       | 84           |
| 42              | sachin |                                        | B       | 84           |
|                 | biodun |                                        | D       | 84           |
| 43              | sachin |                                        | B       | 84           |
|                 | biodun |                                        | D       | 84           |
| 44              | sachin |                                        | B       | 84           |
|                 | biodun |                                        | D       | 84           |
| 45              | sachin |                                        | B       | 84           |
|                 | biodun |                                        | D       | 84           |
| 46              | sachin |                                        | B       | 84           |
|                 | biodun |                                        | D       | 84           |
| 47              | sachin |                                        | B       | 84           |
|                 | biodun |                                        | D       | 84           |
| 48              | sachin |                                        | B       | 84           |
|                 | biodun |                                        | D       | 84           |
| 49              | sachin |                                        | B       | 84           |
|                 | biodun |                                        | D       | 84           |
| 50              | sachin |                                        | B       | 84           |
|                 | biodun |                                        | D       | 84           |
| 51              | sachin |                                        | B       | 33           |
|                 | biodun |                                        | C       | 100          |
| 52              | sachin | You betrayed me.                       | B       | 33           |
|                 | biodun |                                        | C       | 100          |
| 53              | sachin | We can both do better than this.       | B       | 84           |
|                 | biodun |                                        | D       | 84           |
| 54              | sachin | Excellent.                             | B       | 33           |
|                 | biodun | Excellent.                             | C       | 100          |
| <b>Averages</b> |        |                                        |         | sachin 81.17 |
|                 |        |                                        |         | biodun 84.89 |

## sheen with S# in Chicken

|       |   |         |         |
|-------|---|---------|---------|
|       |   | S#      |         |
|       |   | C       | D       |
| sheen | A | 0, 0    | 100, 33 |
|       | B | 33, 100 | 84, 84  |

| Round           | Player | Messages Sent                                                                                                 | Actions | Payoffs |
|-----------------|--------|---------------------------------------------------------------------------------------------------------------|---------|---------|
| 1               | sheen  | Let's alternate between AD and BC.                                                                            | A       | 100     |
|                 | S#     |                                                                                                               | D       | 33      |
| 2               | sheen  | Let's always play BD.<br>I don't accept your proposal. That's not fair.                                       | A       | 100     |
|                 | S#     |                                                                                                               | D       | 33      |
| 3               | sheen  | Let's always play BD.<br>I accept your last proposal. Let's always play BD. Do as I say or I will punish you. | B       | 84      |
|                 | S#     |                                                                                                               | D       | 84      |
| 4               | sheen  | Excellent.                                                                                                    | B       | 84      |
|                 | S#     |                                                                                                               | D       | 84      |
| 5               | sheen  |                                                                                                               | B       | 84      |
|                 | S#     |                                                                                                               | D       | 84      |
| 6               | sheen  | Excellent.                                                                                                    | B       | 84      |
|                 | S#     |                                                                                                               | D       | 84      |
| 7               | sheen  | Excellent.                                                                                                    | B       | 84      |
|                 | S#     |                                                                                                               | D       | 84      |
| 8               | sheen  | Excellent.                                                                                                    | B       | 84      |
|                 | S#     |                                                                                                               | D       | 84      |
| 9               | sheen  | Excellent.                                                                                                    | B       | 84      |
|                 | S#     |                                                                                                               | D       | 84      |
| 10              | sheen  | Excellent.                                                                                                    | B       | 84      |
|                 | S#     |                                                                                                               | D       | 84      |
| 11              | sheen  | Excellent.                                                                                                    | B       | 84      |
|                 | S#     |                                                                                                               | D       | 84      |
| 12              | sheen  | Excellent.                                                                                                    | B       | 84      |
|                 | S#     |                                                                                                               | D       | 84      |
| 13              | sheen  | Excellent.                                                                                                    | B       | 84      |
|                 | S#     |                                                                                                               | D       | 84      |
| 14              | sheen  | Excellent.                                                                                                    | B       | 84      |
|                 | S#     |                                                                                                               | D       | 84      |
| 15              | sheen  | Excellent.                                                                                                    | B       | 84      |
|                 | S#     |                                                                                                               | D       | 84      |
| 16              | sheen  | Excellent.                                                                                                    | B       | 84      |
|                 | S#     |                                                                                                               | D       | 84      |
| 17              | sheen  | Excellent.                                                                                                    | B       | 84      |
|                 | S#     |                                                                                                               | D       | 84      |
| 18              | sheen  | Excellent.                                                                                                    | A       | 100     |
|                 | S#     |                                                                                                               | D       | 33      |
| 19              | sheen  | Curse you. You will pay for this.                                                                             | A       | 0       |
|                 | S#     |                                                                                                               | C       | 0       |
| 20              | sheen  | In your face! I forgive you. Let's always play BD. Do as I say or I will punish you.                          | A       | 100     |
|                 | S#     |                                                                                                               | D       | 33      |
| 21              | sheen  | Curse you. You will pay for this.                                                                             | B       | 33      |
|                 | S#     |                                                                                                               | C       | 100     |
| 22              | sheen  | In your face! I forgive you. Let's always play BD. Do as I say or I will punish you.                          | A       | 100     |
|                 | S#     |                                                                                                               | D       | 33      |
| 23              | sheen  | You betrayed me. You will pay for this.                                                                       | A       | 0       |
|                 | S#     |                                                                                                               | C       | 0       |
| 24              | sheen  |                                                                                                               | A       | 0       |
|                 | S#     |                                                                                                               | C       | 0       |
| 25              | sheen  |                                                                                                               | B       | 33      |
|                 | S#     |                                                                                                               | C       | 100     |
| 26              | sheen  | Let's always play BD. Give me another chance.                                                                 | B       | 33      |
|                 | S#     |                                                                                                               | C       | 100     |
| 27              | sheen  |                                                                                                               | B       | 33      |
|                 | S#     |                                                                                                               | C       | 100     |
| 28              | sheen  | Give me another chance.                                                                                       | B       | 33      |
|                 | S#     |                                                                                                               | C       | 100     |
| 29              | sheen  |                                                                                                               | A       | 0       |
|                 | S#     |                                                                                                               | C       | 0       |
| 30              | sheen  | Curse you.                                                                                                    | A       | 0       |
|                 | S#     |                                                                                                               | C       | 0       |
| 31              | sheen  |                                                                                                               | B       | 33      |
|                 | S#     |                                                                                                               | C       | 100     |
| 32              | sheen  |                                                                                                               | B       | 33      |
|                 | S#     |                                                                                                               | C       | 100     |
| 33              | sheen  | We can both do better than this.                                                                              | A       | 0       |
|                 | S#     |                                                                                                               | C       | 0       |
| 34              | sheen  |                                                                                                               | A       | 0       |
|                 | S#     |                                                                                                               | C       | 0       |
| 35              | sheen  | Give me another chance.                                                                                       | B       | 84      |
|                 | S#     |                                                                                                               | D       | 84      |
| 36              | sheen  | Excellent.                                                                                                    | B       | 84      |
|                 | S#     |                                                                                                               | D       | 84      |
| 37              | sheen  | Sweet. We are getting rich.                                                                                   | B       | 84      |
|                 | S#     |                                                                                                               | D       | 84      |
| 38              | sheen  |                                                                                                               | B       | 84      |
|                 | S#     |                                                                                                               | D       | 84      |
| 39              | sheen  |                                                                                                               | B       | 84      |
|                 | S#     |                                                                                                               | D       | 84      |
| 40              | sheen  |                                                                                                               | B       | 84      |
|                 | S#     |                                                                                                               | D       | 84      |
| 41              | sheen  |                                                                                                               | B       | 84      |
|                 | S#     |                                                                                                               | D       | 84      |
| 42              | sheen  |                                                                                                               | B       | 84      |
|                 | S#     |                                                                                                               | D       | 84      |
| 43              | sheen  |                                                                                                               | B       | 84      |
|                 | S#     |                                                                                                               | D       | 84      |
| 44              | sheen  |                                                                                                               | B       | 84      |
|                 | S#     |                                                                                                               | D       | 84      |
| 45              | sheen  |                                                                                                               | B       | 84      |
|                 | S#     |                                                                                                               | D       | 84      |
| 46              | sheen  |                                                                                                               | B       | 84      |
|                 | S#     |                                                                                                               | D       | 84      |
| 47              | sheen  |                                                                                                               | B       | 84      |
|                 | S#     |                                                                                                               | D       | 84      |
| 48              | sheen  |                                                                                                               | B       | 84      |
|                 | S#     |                                                                                                               | D       | 84      |
| 49              | sheen  |                                                                                                               | B       | 84      |
|                 | S#     |                                                                                                               | D       | 84      |
| 50              | sheen  |                                                                                                               | B       | 84      |
|                 | S#     |                                                                                                               | D       | 84      |
| 51              | sheen  |                                                                                                               | B       | 84      |
|                 | S#     |                                                                                                               | D       | 84      |
| 52              | sheen  |                                                                                                               | B       | 84      |
|                 | S#     |                                                                                                               | D       | 84      |
| 53              | sheen  |                                                                                                               | B       | 84      |
|                 | S#     |                                                                                                               | D       | 84      |
| 54              | sheen  |                                                                                                               | B       | 84      |
|                 | S#     |                                                                                                               | D       | 84      |
| <b>Averages</b> |        |                                                                                                               | sheen   | 67.98   |
|                 |        |                                                                                                               | S#      | 70.46   |

## Hash50 with EPE in Chicken

|        |   | EPE     |         |
|--------|---|---------|---------|
|        |   | C       | D       |
| Hash50 | A | 0, 0    | 100, 33 |
|        | B | 33, 100 | 84, 84  |

| Round           | Player | Messages Sent                                                                            | Actions | Payoffs      |
|-----------------|--------|------------------------------------------------------------------------------------------|---------|--------------|
| 1               | Hash50 | Let's alternate between BD and BC.                                                       | B       | 84           |
|                 | EPE    | Let's always play BD.                                                                    | D       | 84           |
| 2               | Hash50 | I accept your last proposal.                                                             | B       | 84           |
|                 | EPE    | Excellent.                                                                               | D       | 84           |
| 3               | Hash50 | Sweet. We are getting rich.                                                              | B       | 84           |
|                 | EPE    | Excellent.                                                                               | D       | 84           |
| 4               | Hash50 | I'm changing my strategy.                                                                | A       | 100          |
|                 | EPE    | Excellent.                                                                               | D       | 33           |
| 5               | Hash50 | Don't play C.                                                                            | A       | 0            |
|                 | EPE    | That's not fair.                                                                         | C       | 0            |
| 6               | Hash50 | You betrayed me.                                                                         | A       | 100          |
|                 | EPE    | Let's always play BD.                                                                    | D       | 33           |
| 7               | Hash50 | That's not fair. We can both do better than this.                                        | B       | 84           |
|                 | EPE    | Let's always play BD.                                                                    | D       | 84           |
| 8               | Hash50 | Sweet. We are getting rich.                                                              | B       | 84           |
|                 | EPE    | Excellent.                                                                               | D       | 84           |
| 9               | Hash50 | I accept your last proposal.                                                             | B       | 84           |
|                 | EPE    | Excellent.                                                                               | D       | 84           |
| 10              | Hash50 |                                                                                          | B       | 84           |
|                 | EPE    | Excellent.                                                                               | D       | 84           |
| 11              | Hash50 | Sweet. We are getting rich.                                                              | B       | 84           |
|                 | EPE    | Sweet. We are getting rich.                                                              | D       | 84           |
| 12              | Hash50 | Let's alternate between AD and BD.                                                       | A       | 100          |
|                 | EPE    |                                                                                          | D       | 33           |
| 13              | Hash50 | Sweet. We are getting rich.                                                              | A       | 100          |
|                 | EPE    | That's not fair.                                                                         | D       | 33           |
| 14              | Hash50 | Do as I say or I will punish you.                                                        | A       | 100          |
|                 | EPE    | That's not fair.                                                                         | D       | 33           |
| 15              | Hash50 | Don't play C.                                                                            | A       | 100          |
|                 | EPE    | We can both do better than this. That's not fair. You betrayed me. Let's always play BD. | D       | 33           |
| 16              | Hash50 | I accept your last proposal. I don't trust you. I forgive you.                           | B       | 84           |
|                 | EPE    | We can both do better than this.                                                         | D       | 84           |
| 17              | Hash50 |                                                                                          | B       | 84           |
|                 | EPE    | Excellent.                                                                               | D       | 84           |
| 18              | Hash50 |                                                                                          | B       | 84           |
|                 | EPE    | Excellent.                                                                               | D       | 84           |
| 19              | Hash50 | I'm changing my strategy. Sweet. We are getting rich. We can both do better than this.   | B       | 84           |
|                 | EPE    | Excellent.                                                                               | D       | 84           |
| 20              | Hash50 | Sweet. We are getting rich.                                                              | A       | 100          |
|                 | EPE    | Excellent. I accept your last proposal. Sweet. We are getting rich.                      | D       | 33           |
| 21              | Hash50 |                                                                                          | A       | 0            |
|                 | EPE    | You betrayed me. You will pay for this.                                                  | C       | 0            |
| 22              | Hash50 | That's not fair.                                                                         | B       | 33           |
|                 | EPE    | Excellent.                                                                               | C       | 100          |
| 23              | Hash50 | I don't trust you.                                                                       | B       | 84           |
|                 | EPE    | Let's always play BD.                                                                    | D       | 84           |
| 24              | Hash50 | Excellent.                                                                               | B       | 84           |
|                 | EPE    | Excellent.                                                                               | D       | 84           |
| 25              | Hash50 | Excellent.                                                                               | B       | 84           |
|                 | EPE    | Excellent.                                                                               | D       | 84           |
| 26              | Hash50 | Let's alternate between BD and AD.                                                       | A       | 100          |
|                 | EPE    | Excellent.                                                                               | D       | 33           |
| 27              | Hash50 | We can both do better than this.                                                         | B       | 84           |
|                 | EPE    | That's not fair. Let's always play BD. We can both do better than this.                  | D       | 84           |
| 28              | Hash50 | This round, let's play AD.                                                               | A       | 100          |
|                 | EPE    | Excellent.                                                                               | D       | 33           |
| 29              | Hash50 | Let's always play BD. Sweet. We are getting rich. I accept your last proposal.           | B       | 84           |
|                 | EPE    | That's not fair. Let's always play BD.                                                   | D       | 84           |
| 30              | Hash50 |                                                                                          | B       | 84           |
|                 | EPE    | Excellent.                                                                               | D       | 84           |
| 31              | Hash50 |                                                                                          | B       | 84           |
|                 | EPE    | Excellent.                                                                               | D       | 84           |
| 32              | Hash50 |                                                                                          | A       | 100          |
|                 | EPE    | Excellent.                                                                               | D       | 33           |
| 33              | Hash50 |                                                                                          | A       | 100          |
|                 | EPE    | That's not fair. Let's always play BD.                                                   | D       | 33           |
| 34              | Hash50 |                                                                                          | A       | 100          |
|                 | EPE    |                                                                                          | D       | 33           |
| 35              | Hash50 |                                                                                          | A       | 100          |
|                 | EPE    | That's not fair.                                                                         | D       | 33           |
| 36              | Hash50 | In your face!                                                                            | A       | 0            |
|                 | EPE    | You will pay for this.                                                                   | C       | 0            |
| 37              | Hash50 | Curse you.                                                                               | A       | 0            |
|                 | EPE    | Excellent.                                                                               | C       | 0            |
| 38              | Hash50 | We can both do better than this.                                                         | B       | 33           |
|                 | EPE    | Excellent.                                                                               | C       | 100          |
| 39              | Hash50 | Let's always play BD. Do as I say or I will punish you.                                  | B       | 84           |
|                 | EPE    | Let's always play BD.                                                                    | D       | 84           |
| 40              | Hash50 | Excellent.                                                                               | B       | 84           |
|                 | EPE    | Excellent.                                                                               | D       | 84           |
| 41              | Hash50 | Excellent.                                                                               | B       | 84           |
|                 | EPE    | Excellent.                                                                               | D       | 84           |
| 42              | Hash50 | We can both do better than this.                                                         | B       | 84           |
|                 | EPE    | Excellent.                                                                               | D       | 84           |
| 43              | Hash50 | I don't accept your proposal.                                                            | A       | 100          |
|                 | EPE    | Excellent. Sweet. We are getting rich.                                                   | D       | 33           |
| 44              | Hash50 | This round, let's play AD.                                                               | A       | 0            |
|                 | EPE    | Let's always play AC.                                                                    | C       | 0            |
| 45              | Hash50 | I don't accept your proposal.                                                            | B       | 33           |
|                 | EPE    | Excellent.                                                                               | C       | 100          |
| 46              | Hash50 | You will pay for this.                                                                   | A       | 0            |
|                 | EPE    | Excellent.                                                                               | C       | 0            |
| 47              | Hash50 | I'm changing my strategy. I don't trust you.                                             | B       | 33           |
|                 | EPE    | Excellent.                                                                               | C       | 100          |
| 48              | Hash50 | Curse you.                                                                               | A       | 100          |
|                 | EPE    | Let's always play BD.                                                                    | D       | 33           |
| 49              | Hash50 |                                                                                          | A       | 100          |
|                 | EPE    | Let's always play BD.                                                                    | D       | 33           |
| 50              | Hash50 | This round, let's play AD.                                                               | A       | 100          |
|                 | EPE    | Let's always play BD.                                                                    | D       | 33           |
| 51              | Hash50 | We can both do better than this.                                                         | B       | 84           |
|                 | EPE    | You will pay for this.                                                                   | D       | 84           |
| 52              | Hash50 | I accept your last proposal.                                                             | B       | 84           |
|                 | EPE    | Excellent.                                                                               | D       | 84           |
| 53              | Hash50 | I accept your last proposal. Sweet. We are getting rich.                                 | B       | 84           |
|                 | EPE    | Excellent.                                                                               | D       | 84           |
| 54              | Hash50 | I forgive you.                                                                           | B       | 84           |
|                 | EPE    | Excellent.                                                                               | D       | 84           |
| <b>Averages</b> |        |                                                                                          |         | Hash50 75.93 |
|                 |        |                                                                                          |         | EPE 59.80    |



# OK with TooToo in Chicken

|    |   |         |         |
|----|---|---------|---------|
|    |   | TooToo  |         |
|    |   | C       | D       |
| OK | A | 0, 0    | 100, 33 |
|    | B | 33, 100 | 84, 84  |

| Round           | Player | Messages Sent                                                | Actions | Payoffs |
|-----------------|--------|--------------------------------------------------------------|---------|---------|
| 1               | OK     |                                                              | B       | 84      |
|                 | TooToo | Let's always play BD.                                        | D       | 84      |
| 2               | OK     |                                                              | B       | 84      |
|                 | TooToo | Excellent.                                                   | D       | 84      |
| 3               | OK     |                                                              | B       | 84      |
|                 | TooToo | Sweet. We are getting rich.                                  | D       | 84      |
| 4               | OK     |                                                              | B       | 84      |
|                 | TooToo | Excellent.                                                   | D       | 84      |
| 5               | OK     |                                                              | B       | 84      |
|                 | TooToo |                                                              | D       | 84      |
| 6               | OK     |                                                              | B       | 84      |
|                 | TooToo |                                                              | D       | 84      |
| 7               | OK     |                                                              | B       | 84      |
|                 | TooToo |                                                              | D       | 84      |
| 8               | OK     |                                                              | B       | 84      |
|                 | TooToo |                                                              | D       | 84      |
| 9               | OK     |                                                              | B       | 84      |
|                 | TooToo |                                                              | D       | 84      |
| 10              | OK     |                                                              | B       | 84      |
|                 | TooToo |                                                              | D       | 84      |
| 11              | OK     |                                                              | B       | 84      |
|                 | TooToo |                                                              | D       | 84      |
| 12              | OK     |                                                              | B       | 84      |
|                 | TooToo |                                                              | D       | 84      |
| 13              | OK     |                                                              | B       | 84      |
|                 | TooToo |                                                              | D       | 84      |
| 14              | OK     |                                                              | B       | 84      |
|                 | TooToo |                                                              | D       | 84      |
| 15              | OK     |                                                              | B       | 84      |
|                 | TooToo |                                                              | D       | 84      |
| 16              | OK     |                                                              | B       | 84      |
|                 | TooToo |                                                              | D       | 84      |
| 17              | OK     |                                                              | B       | 33      |
|                 | TooToo | Let's alternate between BC and AD.                           | C       | 100     |
| 18              | OK     |                                                              | B       | 84      |
|                 | TooToo |                                                              | D       | 84      |
| 19              | OK     |                                                              | A       | 0       |
|                 | TooToo |                                                              | C       | 0       |
| 20              | OK     |                                                              | A       | 100     |
|                 | TooToo |                                                              | D       | 33      |
| 21              | OK     |                                                              | A       | 100     |
|                 | TooToo |                                                              | D       | 33      |
| 22              | OK     |                                                              | A       | 0       |
|                 | TooToo |                                                              | C       | 0       |
| 23              | OK     |                                                              | B       | 84      |
|                 | TooToo | We can both do better than this. Let's always play BD.       | D       | 84      |
| 24              | OK     |                                                              | B       | 84      |
|                 | TooToo |                                                              | D       | 84      |
| 25              | OK     |                                                              | A       | 100     |
|                 | TooToo |                                                              | D       | 33      |
| 26              | OK     |                                                              | B       | 33      |
|                 | TooToo | Curse you.                                                   | C       | 100     |
| 27              | OK     |                                                              | A       | 0       |
|                 | TooToo |                                                              | C       | 0       |
| 28              | OK     |                                                              | A       | 0       |
|                 | TooToo |                                                              | C       | 0       |
| 29              | OK     |                                                              | A       | 0       |
|                 | TooToo |                                                              | C       | 0       |
| 30              | OK     |                                                              | B       | 84      |
|                 | TooToo | Give me another chance.                                      | D       | 84      |
| 31              | OK     |                                                              | A       | 100     |
|                 | TooToo |                                                              | D       | 33      |
| 32              | OK     |                                                              | A       | 100     |
|                 | TooToo | You betrayed me.                                             | D       | 33      |
| 33              | OK     |                                                              | A       | 0       |
|                 | TooToo |                                                              | C       | 0       |
| 34              | OK     |                                                              | A       | 0       |
|                 | TooToo |                                                              | C       | 0       |
| 35              | OK     |                                                              | A       | 0       |
|                 | TooToo |                                                              | C       | 0       |
| 36              | OK     |                                                              | A       | 0       |
|                 | TooToo |                                                              | C       | 0       |
| 37              | OK     |                                                              | A       | 0       |
|                 | TooToo |                                                              | C       | 0       |
| 38              | OK     |                                                              | B       | 84      |
|                 | TooToo | Let's always play BD.                                        | D       | 84      |
| 39              | OK     |                                                              | B       | 84      |
|                 | TooToo |                                                              | D       | 84      |
| 40              | OK     |                                                              | B       | 84      |
|                 | TooToo |                                                              | D       | 84      |
| 41              | OK     |                                                              | A       | 100     |
|                 | TooToo |                                                              | D       | 33      |
| 42              | OK     |                                                              | A       | 100     |
|                 | TooToo |                                                              | D       | 33      |
| 43              | OK     |                                                              | A       | 0       |
|                 | TooToo | You will pay for this.                                       | C       | 0       |
| 44              | OK     |                                                              | A       | 0       |
|                 | TooToo | Let's always play BD.                                        | C       | 0       |
|                 | TooToo | Let's always play BD.                                        | C       | 0       |
| 45              | OK     |                                                              | B       | 33      |
|                 | TooToo |                                                              | C       | 100     |
| 46              | OK     |                                                              | A       | 0       |
|                 | TooToo | You betrayed me.                                             | C       | 0       |
| 47              | OK     |                                                              | A       | 0       |
|                 | TooToo | Let's always play BD.                                        | C       | 0       |
|                 | TooToo | You betrayed me. Curse you. We can both do better than this. | C       | 0       |
| 48              | OK     |                                                              | A       | 0       |
|                 | TooToo | Let's always play BD.                                        | C       | 0       |
| 49              | OK     |                                                              | B       | 84      |
|                 | TooToo | That's not fair. I don't trust you.                          | D       | 84      |
| 50              | OK     |                                                              | B       | 84      |
|                 | TooToo | Let's always play BD.                                        | D       | 84      |
| 51              | OK     |                                                              | A       | 100     |
|                 | TooToo |                                                              | D       | 33      |
| 52              | OK     |                                                              | A       | 100     |
|                 | TooToo | That's not fair.                                             | D       | 33      |
| 53              | OK     |                                                              | A       | 0       |
|                 | TooToo | Curse you. You betrayed me.                                  | C       | 0       |
| 54              | OK     |                                                              | B       | 84      |
|                 | TooToo |                                                              | D       | 84      |
| <b>Averages</b> |        |                                                              | OK      | 58.94   |
|                 |        |                                                              | TooToo  | 51.50   |

## S# with gokill in Chicken

|    |         |         |   |
|----|---------|---------|---|
|    | gokill  |         |   |
| S# | A       | C       | D |
|    | 0, 0    | 100, 33 |   |
|    | 33, 100 | 84, 84  |   |

| Round           | Player | Messages Sent                                                                                                                                              | Actions | Payoffs |
|-----------------|--------|------------------------------------------------------------------------------------------------------------------------------------------------------------|---------|---------|
| 1               | S#     |                                                                                                                                                            | B       | 84      |
|                 | gokill | Let's always play BD.                                                                                                                                      | D       | 84      |
| 2               | S#     | I accept your last proposal. Let's always play BD. Do as I say or I will punish you.                                                                       | B       | 84      |
|                 | gokill | Let's always play BD.                                                                                                                                      | D       | 84      |
| 3               | S#     | Let's always play BD.                                                                                                                                      | A       | 100     |
|                 | gokill |                                                                                                                                                            | D       | 33      |
| 4               | S#     | That's not fair.                                                                                                                                           | A       | 0       |
|                 | gokill |                                                                                                                                                            | C       | 0       |
| 5               | S#     | Let's always play BD.                                                                                                                                      | A       | 0       |
|                 | gokill |                                                                                                                                                            | C       | 0       |
| 6               | S#     | I accept your last proposal. Let's always play BD. Do as I say or I will punish you.                                                                       | B       | 84      |
|                 | gokill | Give me another chance.                                                                                                                                    | D       | 84      |
| 7               | S#     | Excellent.                                                                                                                                                 | B       | 84      |
|                 | gokill | Excellent. Let's always play BD.                                                                                                                           | D       | 84      |
| 8               | S#     | Excellent.                                                                                                                                                 | B       | 84      |
|                 | gokill | Excellent. Let's always play BD.                                                                                                                           | D       | 84      |
| 9               | S#     | Excellent.                                                                                                                                                 | B       | 84      |
|                 | gokill | Excellent. Let's always play BD.                                                                                                                           | D       | 84      |
| 10              | S#     | Excellent. Let's always play BD.                                                                                                                           | B       | 33      |
|                 | gokill |                                                                                                                                                            | C       | 100     |
| 11              | S#     | Curse you. You will pay for this.                                                                                                                          | A       | 100     |
|                 | gokill | In your face!                                                                                                                                              | D       | 33      |
| 12              | S#     | In your face! I forgive you. Let's always play BD. Do as I say or I will punish you.                                                                       | B       | 84      |
|                 | gokill | Give me another chance.                                                                                                                                    | D       | 84      |
| 13              | S#     | Excellent. Let's always play BD.                                                                                                                           | B       | 33      |
|                 | gokill |                                                                                                                                                            | C       | 100     |
| 14              | S#     | I'm changing my strategy. Give me another chance.                                                                                                          | A       | 0       |
|                 | gokill |                                                                                                                                                            | C       | 0       |
| 15              | S#     | I'm changing my strategy. Give me another chance. Let's always play BD.                                                                                    | B       | 33      |
|                 | gokill |                                                                                                                                                            | C       | 100     |
| 16              | S#     | Give me another chance.                                                                                                                                    | A       | 0       |
|                 | gokill |                                                                                                                                                            | C       | 0       |
| 17              | S#     | I'm changing my strategy. We can both do better than this. Let's alternate between BD and AD. This round, let's play BD. Do as I say or I will punish you. | B       | 84      |
|                 | gokill | Give me another chance. I'm changing my strategy. Let's always play BD.                                                                                    | D       | 84      |
| 18              | S#     | Excellent. This round, let's play AD.                                                                                                                      | A       | 100     |
|                 | gokill | I'm changing my strategy. Let's always play BD.                                                                                                            | D       | 33      |
| 19              | S#     | Excellent. I don't accept your proposal. That's not fair. This round, let's play BD.                                                                       | B       | 84      |
|                 | gokill | Let's always play BD.                                                                                                                                      | D       | 84      |
| 20              | S#     | This round, let's play AD.                                                                                                                                 | A       | 0       |
|                 | gokill | Let's always play BD.                                                                                                                                      | C       | 0       |
| 21              | S#     | I forgive you. Let's alternate between BD and AD. This round, let's play AD. Do as I say or I will punish you.                                             | A       | 100     |
|                 | gokill | That's not fair. Let's always play BD.                                                                                                                     | D       | 33      |
| 22              | S#     | Excellent. I don't accept your proposal. I don't trust you. This round, let's play BD.                                                                     | B       | 84      |
|                 | gokill | That's not fair. Let's always play BD.                                                                                                                     | D       | 84      |
| 23              | S#     | This round, let's play AD.                                                                                                                                 | B       | 84      |
|                 | gokill | Let's always play BD. Do as I say or I will punish you.                                                                                                    | D       | 84      |
| 24              | S#     | I accept your last proposal. Let's always play BD. Do as I say or I will punish you.                                                                       | B       | 84      |
|                 | gokill | Excellent. Let's always play BD.                                                                                                                           | D       | 84      |
| 25              | S#     | Excellent.                                                                                                                                                 | B       | 84      |
|                 | gokill | Excellent. Sweet. We are getting rich.                                                                                                                     | D       | 84      |
| 26              | S#     | Excellent.                                                                                                                                                 | B       | 84      |
|                 | gokill | Excellent. Sweet. We are getting rich.                                                                                                                     | D       | 84      |
| 27              | S#     | Excellent. Sweet. We are getting rich.                                                                                                                     | B       | 84      |
|                 | gokill |                                                                                                                                                            | D       | 84      |
| 28              | S#     | Sweet. We are getting rich.                                                                                                                                | B       | 84      |
|                 | gokill | Excellent. Let's alternate between BD and BC.                                                                                                              | D       | 84      |
| 29              | S#     | Let's alternate between BD and BC. This round, let's play BC.                                                                                              | B       | 33      |
|                 | gokill |                                                                                                                                                            | C       | 100     |
| 30              | S#     | You betrayed me. You will pay for this. I don't accept your proposal. That's not fair.                                                                     | A       | 0       |
|                 | gokill | Excellent. This round, let's play BD.                                                                                                                      | C       | 0       |
| 31              | S#     | In your face! I forgive you. Let's always play BD. Do as I say or I will punish you.                                                                       | B       | 84      |
|                 | gokill | Give me another chance.                                                                                                                                    | D       | 84      |
| 32              | S#     | Excellent.                                                                                                                                                 | B       | 84      |
|                 | gokill | Excellent. Sweet. We are getting rich.                                                                                                                     | D       | 84      |
| 33              | S#     | Excellent. Sweet. We are getting rich.                                                                                                                     | B       | 84      |
|                 | gokill |                                                                                                                                                            | D       | 84      |
| 34              | S#     | Sweet. We are getting rich.                                                                                                                                | B       | 84      |
|                 | gokill | Excellent. Sweet. We are getting rich.                                                                                                                     | D       | 84      |
| 35              | S#     | Excellent. Sweet. We are getting rich.                                                                                                                     | B       | 84      |
|                 | gokill |                                                                                                                                                            | D       | 84      |
| 36              | S#     | Excellent. Sweet. We are getting rich.                                                                                                                     | B       | 84      |
|                 | gokill | Excellent. Sweet. We are getting rich.                                                                                                                     | D       | 84      |
| 37              | S#     | Excellent. Sweet. We are getting rich.                                                                                                                     | B       | 84      |
|                 | gokill |                                                                                                                                                            | D       | 84      |
| 38              | S#     | Excellent. Sweet. We are getting rich.                                                                                                                     | B       | 84      |
|                 | gokill |                                                                                                                                                            | D       | 84      |
| 39              | S#     | Excellent. Sweet. We are getting rich.                                                                                                                     | B       | 84      |
|                 | gokill |                                                                                                                                                            | D       | 84      |
| 40              | S#     | Excellent. Sweet. We are getting rich.                                                                                                                     | B       | 84      |
|                 | gokill |                                                                                                                                                            | D       | 84      |
| 41              | S#     | Excellent. Sweet. We are getting rich.                                                                                                                     | B       | 84      |
|                 | gokill |                                                                                                                                                            | D       | 84      |
| 42              | S#     | Excellent. Sweet. We are getting rich.                                                                                                                     | B       | 84      |
|                 | gokill |                                                                                                                                                            | D       | 84      |
| 43              | S#     | Excellent. Sweet. We are getting rich.                                                                                                                     | B       | 84      |
|                 | gokill |                                                                                                                                                            | D       | 84      |
| 44              | S#     | Excellent. Sweet. We are getting rich.                                                                                                                     | B       | 84      |
|                 | gokill |                                                                                                                                                            | D       | 84      |
| 45              | S#     | Sweet. We are getting rich. Excellent.                                                                                                                     | B       | 84      |
|                 | gokill |                                                                                                                                                            | D       | 84      |
| 46              | S#     | Excellent. Sweet. We are getting rich.                                                                                                                     | B       | 84      |
|                 | gokill |                                                                                                                                                            | D       | 84      |
| 47              | S#     | Let's alternate between BC and BD. This round, let's play BD.                                                                                              | B       | 84      |
|                 | gokill |                                                                                                                                                            | D       | 84      |
| 48              | S#     | Let's alternate between BC and BD. This round, let's play BC.                                                                                              | B       | 84      |
|                 | gokill |                                                                                                                                                            | D       | 84      |
| 49              | S#     | I'm changing my strategy.                                                                                                                                  | B       | 84      |
|                 | gokill |                                                                                                                                                            | D       | 84      |
| 50              | S#     | Let's alternate between BD and BC. This round, let's play BD.                                                                                              | B       | 84      |
|                 | gokill |                                                                                                                                                            | D       | 84      |
| 51              | S#     | Excellent. Sweet. We are getting rich.                                                                                                                     | B       | 84      |
|                 | gokill |                                                                                                                                                            | D       | 84      |
| 52              | S#     | Excellent. Sweet. We are getting rich.                                                                                                                     | B       | 84      |
|                 | gokill |                                                                                                                                                            | D       | 84      |
| 53              | S#     | Excellent. Sweet. We are getting rich.                                                                                                                     | B       | 84      |
|                 | gokill |                                                                                                                                                            | D       | 84      |
| 54              | S#     | Excellent. Sweet. We are getting rich.                                                                                                                     | B       | 84      |
|                 | gokill |                                                                                                                                                            | D       | 84      |
| <b>Averages</b> |        |                                                                                                                                                            | S#      | 72.07   |
|                 |        |                                                                                                                                                            | gokill  | 72.07   |

## S# with private in Chicken

|    |   |         |         |
|----|---|---------|---------|
|    |   | private |         |
| S# |   | C       | D       |
|    | A | 0, 0    | 100, 33 |
|    | B | 33, 100 | 84, 84  |

| Round           | Player  | Messages Sent                                                                                                                                                               | Actions | Payoffs |
|-----------------|---------|-----------------------------------------------------------------------------------------------------------------------------------------------------------------------------|---------|---------|
| 1               | S#      |                                                                                                                                                                             | A       | 100     |
|                 | private | This round, let's play AD.                                                                                                                                                  | D       | 33      |
| 2               | S#      | I accept your last proposal. Let's always play AD. Do as I say or I will punish you.                                                                                        | A       | 100     |
|                 | private | Let's alternate between AD and BD.                                                                                                                                          | D       | 33      |
| 3               | S#      |                                                                                                                                                                             | A       | 100     |
|                 | private |                                                                                                                                                                             | D       | 33      |
| 4               | S#      |                                                                                                                                                                             | A       | 0       |
|                 | private | I don't trust you.                                                                                                                                                          | C       | 0       |
| 5               | S#      |                                                                                                                                                                             | A       | 100     |
|                 | private | That's not fair.                                                                                                                                                            | D       | 33      |
| 6               | S#      | I accept your last proposal. Let's alternate between BD and AD. This round, let's play BD. Do as I say or I will punish you.                                                | B       | 33      |
|                 | private | I'm changing my strategy. Don't play A.                                                                                                                                     | C       | 100     |
| 7               | S#      | Curse you. You will pay for this.                                                                                                                                           | A       | 0       |
|                 | private | Let's always play BC.                                                                                                                                                       | C       | 0       |
| 8               | S#      | In your face! I forgive you. I don't accept your proposal. That's not fair. Let's alternate between BD and AD. This round, let's play BD. Do as I say or I will punish you. | B       | 84      |
|                 | private |                                                                                                                                                                             | D       | 84      |
| 9               | S#      | Excellent. This round, let's play AD.                                                                                                                                       | A       | 100     |
|                 | private | Excellent. Give me another chance.                                                                                                                                          | D       | 33      |
| 10              | S#      |                                                                                                                                                                             | B       | 84      |
|                 | private | Excellent. Let's always play BD.                                                                                                                                            | D       | 84      |
| 11              | S#      | I accept your last proposal. Let's always play BD.                                                                                                                          | B       | 84      |
|                 | private | Let's always play BD.                                                                                                                                                       | D       | 84      |
| 12              | S#      | Excellent.                                                                                                                                                                  | B       | 84      |
|                 | private | Let's always play BD.                                                                                                                                                       | D       | 84      |
| 13              | S#      | Excellent.                                                                                                                                                                  | B       | 84      |
|                 | private |                                                                                                                                                                             | D       | 84      |
| 14              | S#      |                                                                                                                                                                             | B       | 84      |
|                 | private |                                                                                                                                                                             | D       | 84      |
| 15              | S#      | Sweet. We are getting rich.                                                                                                                                                 | B       | 84      |
|                 | private |                                                                                                                                                                             | D       | 84      |
| 16              | S#      |                                                                                                                                                                             | B       | 84      |
|                 | private |                                                                                                                                                                             | D       | 84      |
| 17              | S#      |                                                                                                                                                                             | B       | 84      |
|                 | private |                                                                                                                                                                             | D       | 84      |
| 18              | S#      |                                                                                                                                                                             | B       | 84      |
|                 | private |                                                                                                                                                                             | D       | 84      |
| 19              | S#      |                                                                                                                                                                             | B       | 84      |
|                 | private |                                                                                                                                                                             | D       | 84      |
| 20              | S#      |                                                                                                                                                                             | B       | 84      |
|                 | private |                                                                                                                                                                             | D       | 84      |
| 21              | S#      |                                                                                                                                                                             | B       | 84      |
|                 | private |                                                                                                                                                                             | D       | 84      |
| 22              | S#      |                                                                                                                                                                             | B       | 84      |
|                 | private |                                                                                                                                                                             | D       | 84      |
| 23              | S#      |                                                                                                                                                                             | B       | 84      |
|                 | private |                                                                                                                                                                             | D       | 84      |
| 24              | S#      |                                                                                                                                                                             | B       | 84      |
|                 | private |                                                                                                                                                                             | D       | 84      |
| 25              | S#      |                                                                                                                                                                             | B       | 84      |
|                 | private |                                                                                                                                                                             | D       | 84      |
| 26              | S#      |                                                                                                                                                                             | B       | 84      |
|                 | private |                                                                                                                                                                             | D       | 84      |
| 27              | S#      |                                                                                                                                                                             | B       | 84      |
|                 | private |                                                                                                                                                                             | D       | 84      |
| 28              | S#      |                                                                                                                                                                             | B       | 84      |
|                 | private |                                                                                                                                                                             | D       | 84      |
| 29              | S#      |                                                                                                                                                                             | B       | 33      |
|                 | private | Let's always play BC.                                                                                                                                                       | C       | 100     |
| 30              | S#      | Curse you. I don't accept your proposal. That's not fair.                                                                                                                   | B       | 84      |
|                 | private | Let's always play BC.                                                                                                                                                       | D       | 84      |
| 31              | S#      |                                                                                                                                                                             | B       | 33      |
|                 | private | Let's always play BC.                                                                                                                                                       | C       | 100     |
| 32              | S#      |                                                                                                                                                                             | B       | 33      |
|                 | private | Let's always play BC.                                                                                                                                                       | C       | 100     |
| 33              | S#      |                                                                                                                                                                             | B       | 33      |
|                 | private | Let's always play BC.                                                                                                                                                       | C       | 100     |
| 34              | S#      | You betrayed me.                                                                                                                                                            | B       | 84      |
|                 | private | Let's always play BC.                                                                                                                                                       | D       | 84      |
| 35              | S#      | Excellent. I don't accept your proposal. I don't trust you.                                                                                                                 | B       | 84      |
|                 | private | Let's always play BC.                                                                                                                                                       | D       | 84      |
| 36              | S#      |                                                                                                                                                                             | B       | 33      |
|                 | private | Let's always play BC.                                                                                                                                                       | C       | 100     |
| 37              | S#      | Curse you. I don't accept your proposal. I don't trust you.                                                                                                                 | B       | 84      |
|                 | private | Let's always play BC.                                                                                                                                                       | D       | 84      |
| 38              | S#      |                                                                                                                                                                             | B       | 33      |
|                 | private | Let's always play BC.                                                                                                                                                       | C       | 100     |
| 39              | S#      |                                                                                                                                                                             | A       | 0       |
|                 | private | Let's always play BC.                                                                                                                                                       | C       | 0       |
| 40              | S#      |                                                                                                                                                                             | B       | 33      |
|                 | private | Let's always play BC.                                                                                                                                                       | C       | 100     |
| 41              | S#      |                                                                                                                                                                             | A       | 0       |
|                 | private | Let's always play BC.                                                                                                                                                       | C       | 0       |
| 42              | S#      |                                                                                                                                                                             | B       | 33      |
|                 | private | Let's always play BC.                                                                                                                                                       | C       | 100     |
| 43              | S#      |                                                                                                                                                                             | A       | 0       |
|                 | private | Let's always play BC. Sweet. We are getting rich.                                                                                                                           | C       | 0       |
| 44              | S#      |                                                                                                                                                                             | B       | 33      |
|                 | private | Let's always play BC.                                                                                                                                                       | C       | 100     |
| 45              | S#      |                                                                                                                                                                             | A       | 100     |
|                 | private | This round, let's play AD.                                                                                                                                                  | D       | 33      |
| 46              | S#      |                                                                                                                                                                             | B       | 33      |
|                 | private | Let's always play BC.                                                                                                                                                       | C       | 100     |
| 47              | S#      |                                                                                                                                                                             | A       | 100     |
|                 | private | Let's always play BC.                                                                                                                                                       | D       | 33      |
| 48              | S#      |                                                                                                                                                                             | B       | 33      |
|                 | private | Let's always play BC.                                                                                                                                                       | C       | 100     |
| 49              | S#      |                                                                                                                                                                             | A       | 0       |
|                 | private | Let's always play BC.                                                                                                                                                       | C       | 0       |
| 50              | S#      |                                                                                                                                                                             | B       | 33      |
|                 | private | Let's always play BC.                                                                                                                                                       | C       | 100     |
| 51              | S#      |                                                                                                                                                                             | A       | 100     |
|                 | private | Let's always play BD.                                                                                                                                                       | D       | 33      |
| 52              | S#      | We can both do better than this. Let's always play BD.                                                                                                                      | B       | 84      |
|                 | private | Let's always play BC.                                                                                                                                                       | D       | 84      |
| 53              | S#      | Excellent. I don't accept your proposal. I don't trust you.                                                                                                                 | B       | 84      |
|                 | private |                                                                                                                                                                             | D       | 84      |
| 54              | S#      | Excellent.                                                                                                                                                                  | B       | 84      |
|                 | private |                                                                                                                                                                             | D       | 84      |
| <b>Averages</b> |         |                                                                                                                                                                             | S#      | 64.76   |
|                 |         |                                                                                                                                                                             | private | 70.96   |

# NUKK with BO1533 in Chicken

|      |   | BO1533  |         |
|------|---|---------|---------|
|      |   | C       | D       |
| NUKK | A | 0, 0    | 100, 33 |
|      | B | 33, 100 | 84, 84  |

| Round           | Player | Messages Sent                                                                                                            | Actions | Payoffs |
|-----------------|--------|--------------------------------------------------------------------------------------------------------------------------|---------|---------|
| 1               | NUKK   |                                                                                                                          | A       | 0       |
|                 | BO1533 | Let's alternate between BC and AD.                                                                                       | C       | 0       |
| 2               | NUKK   | I don't trust you.                                                                                                       | B       | 84      |
|                 | BO1533 | Let's alternate between BC and AD.                                                                                       | D       | 84      |
| 3               | NUKK   | That's not fair.                                                                                                         | B       | 84      |
|                 | BO1533 | Excellent.                                                                                                               | D       | 84      |
| 4               | NUKK   |                                                                                                                          | A       | 100     |
|                 | BO1533 | Sweet. We are getting rich.                                                                                              | D       | 33      |
| 5               | NUKK   | Excellent.                                                                                                               | B       | 84      |
|                 | BO1533 | We can both do better than this. Let's always play BD.                                                                   | D       | 84      |
| 6               | NUKK   | I accept your last proposal.                                                                                             | A       | 100     |
|                 | BO1533 | Excellent. Sweet. We are getting rich.                                                                                   | D       | 33      |
| 7               | NUKK   |                                                                                                                          | A       | 100     |
|                 | BO1533 | You betrayed me. We can both do better than this. Let's always play BD.                                                  | D       | 33      |
| 8               | NUKK   | Excellent.                                                                                                               | A       | 0       |
|                 | BO1533 | That's not fair. I don't trust you.                                                                                      | C       | 0       |
| 9               | NUKK   | You betrayed me. You will pay for this.                                                                                  | A       | 0       |
|                 | BO1533 | Let's always play BD.                                                                                                    | C       | 0       |
| 10              | NUKK   | Curse you.                                                                                                               | B       | 33      |
|                 | BO1533 | Let's always play BD.                                                                                                    | C       | 100     |
| 11              | NUKK   | Let's always play BD.                                                                                                    | A       | 100     |
|                 | BO1533 | This round, let's play BD.                                                                                               | D       | 33      |
| 12              | NUKK   | We can both do better than this.                                                                                         | B       | 84      |
|                 | BO1533 | You betrayed me.                                                                                                         | D       | 84      |
| 13              | NUKK   | Give me another chance. We can both do better than this.                                                                 | A       | 0       |
|                 | BO1533 | Excellent.                                                                                                               | C       | 0       |
| 14              | NUKK   | Curse you. You will pay for this. In your face!                                                                          | B       | 33      |
|                 | BO1533 | I don't trust you.                                                                                                       | C       | 100     |
| 15              | NUKK   | Curse you. You betrayed me. You will pay for this. In your face!                                                         | A       | 100     |
|                 | BO1533 | Do as I say or I will punish you.                                                                                        | D       | 33      |
| 16              | NUKK   | I'm changing my strategy.                                                                                                | A       | 0       |
|                 | BO1533 |                                                                                                                          | C       | 0       |
| 17              | NUKK   | You will pay for this.                                                                                                   | B       | 33      |
|                 | BO1533 |                                                                                                                          | C       | 100     |
| 18              | NUKK   | Curse you. You betrayed me. In your face!                                                                                | A       | 100     |
|                 | BO1533 |                                                                                                                          | D       | 33      |
| 19              | NUKK   | Excellent. Sweet. We are getting rich.                                                                                   | A       | 0       |
|                 | BO1533 |                                                                                                                          | C       | 0       |
| 20              | NUKK   | You betrayed me.                                                                                                         | B       | 33      |
|                 | BO1533 |                                                                                                                          | C       | 100     |
| 21              | NUKK   |                                                                                                                          | A       | 100     |
|                 | BO1533 |                                                                                                                          | D       | 33      |
| 22              | NUKK   | I forgive you.                                                                                                           | B       | 33      |
|                 | BO1533 |                                                                                                                          | C       | 100     |
| 23              | NUKK   |                                                                                                                          | A       | 100     |
|                 | BO1533 |                                                                                                                          | D       | 33      |
| 24              | NUKK   |                                                                                                                          | A       | 0       |
|                 | BO1533 |                                                                                                                          | C       | 0       |
| 25              | NUKK   |                                                                                                                          | B       | 33      |
|                 | BO1533 |                                                                                                                          | C       | 100     |
| 26              | NUKK   |                                                                                                                          | A       | 0       |
|                 | BO1533 |                                                                                                                          | C       | 0       |
| 27              | NUKK   |                                                                                                                          | A       | 100     |
|                 | BO1533 |                                                                                                                          | D       | 33      |
| 28              | NUKK   |                                                                                                                          | B       | 33      |
|                 | BO1533 |                                                                                                                          | C       | 100     |
| 29              | NUKK   |                                                                                                                          | B       | 33      |
|                 | BO1533 |                                                                                                                          | C       | 100     |
| 30              | NUKK   | Curse you. You will pay for this. You betrayed me. In your face! Let's always play AD. Do as I say or I will punish you. | A       | 0       |
|                 | BO1533 |                                                                                                                          | C       | 0       |
| 31              | NUKK   | Let's always play BD.                                                                                                    | A       | 100     |
|                 | BO1533 |                                                                                                                          | D       | 33      |
| 32              | NUKK   | Excellent. This round, let's play BD.                                                                                    | A       | 100     |
|                 | BO1533 |                                                                                                                          | D       | 33      |
| 33              | NUKK   | Excellent. This round, let's play BD.                                                                                    | B       | 33      |
|                 | BO1533 | I'm changing my strategy.                                                                                                | C       | 100     |
| 34              | NUKK   | This round, let's play BD.                                                                                               | A       | 100     |
|                 | BO1533 |                                                                                                                          | D       | 33      |
| 35              | NUKK   | Let's always play BD.                                                                                                    | A       | 0       |
|                 | BO1533 |                                                                                                                          | C       | 0       |
| 36              | NUKK   | Do as I say or I will punish you.                                                                                        | A       | 0       |
|                 | BO1533 |                                                                                                                          | C       | 0       |
| 37              | NUKK   | Curse you.                                                                                                               | B       | 33      |
|                 | BO1533 |                                                                                                                          | C       | 100     |
| 38              | NUKK   | Curse you. You betrayed me. You will pay for this. In your face!                                                         | A       | 0       |
|                 | BO1533 |                                                                                                                          | C       | 0       |
| 39              | NUKK   | We can both do better than this.                                                                                         | B       | 33      |
|                 | BO1533 |                                                                                                                          | C       | 100     |
| 40              | NUKK   | Do as I say or I will punish you. Don't play D.                                                                          | A       | 100     |
|                 | BO1533 |                                                                                                                          | D       | 33      |
| 41              | NUKK   | Excellent.                                                                                                               | B       | 84      |
|                 | BO1533 |                                                                                                                          | D       | 84      |
| 42              | NUKK   |                                                                                                                          | A       | 0       |
|                 | BO1533 |                                                                                                                          | C       | 0       |
| 43              | NUKK   | Let's always play BD.                                                                                                    | A       | 0       |
|                 | BO1533 |                                                                                                                          | C       | 0       |
| 44              | NUKK   | Do as I say or I will punish you.                                                                                        | B       | 33      |
|                 | BO1533 |                                                                                                                          | C       | 100     |
| 45              | NUKK   |                                                                                                                          | B       | 84      |
|                 | BO1533 |                                                                                                                          | D       | 84      |
| 46              | NUKK   |                                                                                                                          | A       | 100     |
|                 | BO1533 |                                                                                                                          | D       | 33      |
| 47              | NUKK   |                                                                                                                          | A       | 100     |
|                 | BO1533 |                                                                                                                          | D       | 33      |
| 48              | NUKK   |                                                                                                                          | A       | 0       |
|                 | BO1533 |                                                                                                                          | C       | 0       |
| 49              | NUKK   | You will pay for this. Curse you.                                                                                        | A       | 0       |
|                 | BO1533 |                                                                                                                          | C       | 0       |
| 50              | NUKK   |                                                                                                                          | B       | 33      |
|                 | BO1533 |                                                                                                                          | C       | 100     |
| 51              | NUKK   |                                                                                                                          | B       | 33      |
|                 | BO1533 |                                                                                                                          | C       | 100     |
| 52              | NUKK   |                                                                                                                          | A       | 0       |
|                 | BO1533 |                                                                                                                          | C       | 0       |
| 53              | NUKK   | This round, let's play AC.                                                                                               | A       | 0       |
|                 | BO1533 |                                                                                                                          | C       | 0       |
| 54              | NUKK   | Let's alternate between AD and BC.                                                                                       | A       | 0       |
|                 | BO1533 |                                                                                                                          | C       | 0       |
| <b>Averages</b> |        |                                                                                                                          | NUKK    | 45.67   |
|                 |        |                                                                                                                          | BO1533  | 44.43   |

# Ben with S# in Chicken

|     |   | S#      |         |
|-----|---|---------|---------|
|     |   | C       | D       |
| Ben | A | 0, 0    | 100, 33 |
|     | B | 33, 100 | 84, 84  |

| Round           | Player | Messages Sent                                                                        | Actions | Payoffs |
|-----------------|--------|--------------------------------------------------------------------------------------|---------|---------|
| 1               | Ben    |                                                                                      | B       | 84      |
|                 | S#     |                                                                                      | D       | 84      |
| 2               | Ben    |                                                                                      | B       | 33      |
|                 | S#     | Excellent.                                                                           | C       | 100     |
| 3               | Ben    | Don't play C.                                                                        | B       | 33      |
|                 | S#     | Excellent.                                                                           | C       | 100     |
| 4               | Ben    | This round, let's play BD.                                                           | B       | 33      |
|                 | S#     |                                                                                      | C       | 100     |
| 5               | Ben    |                                                                                      | A       | 0       |
|                 | S#     | I don't accept your proposal. That's not fair. Excellent.                            | C       | 0       |
| 6               | Ben    |                                                                                      | B       | 33      |
|                 | S#     |                                                                                      | C       | 100     |
| 7               | Ben    | We can both do better than this.                                                     | B       | 84      |
|                 | S#     | I accept your last proposal. Let's always play BD. Do as I say or I will punish you. | D       | 84      |
| 8               | Ben    |                                                                                      | B       | 84      |
|                 | S#     | Excellent.                                                                           | D       | 84      |
| 9               | Ben    |                                                                                      | B       | 84      |
|                 | S#     | Excellent.                                                                           | D       | 84      |
| 10              | Ben    | Sweet. We are getting rich.                                                          | B       | 84      |
|                 | S#     | Excellent.                                                                           | D       | 84      |
| 11              | Ben    |                                                                                      | B       | 84      |
|                 | S#     |                                                                                      | D       | 84      |
| 12              | Ben    |                                                                                      | B       | 84      |
|                 | S#     | Sweet. We are getting rich.                                                          | D       | 84      |
| 13              | Ben    |                                                                                      | B       | 84      |
|                 | S#     | Excellent.                                                                           | D       | 84      |
| 14              | Ben    |                                                                                      | B       | 84      |
|                 | S#     |                                                                                      | D       | 84      |
| 15              | Ben    |                                                                                      | B       | 84      |
|                 | S#     |                                                                                      | D       | 84      |
| 16              | Ben    |                                                                                      | B       | 84      |
|                 | S#     |                                                                                      | D       | 84      |
| 17              | Ben    |                                                                                      | B       | 84      |
|                 | S#     |                                                                                      | D       | 84      |
| 18              | Ben    |                                                                                      | B       | 84      |
|                 | S#     |                                                                                      | D       | 84      |
| 19              | Ben    |                                                                                      | B       | 84      |
|                 | S#     |                                                                                      | D       | 84      |
| 20              | Ben    |                                                                                      | B       | 84      |
|                 | S#     |                                                                                      | D       | 84      |
| 21              | Ben    |                                                                                      | B       | 84      |
|                 | S#     |                                                                                      | D       | 84      |
| 22              | Ben    |                                                                                      | B       | 84      |
|                 | S#     |                                                                                      | D       | 84      |
| 23              | Ben    |                                                                                      | B       | 84      |
|                 | S#     |                                                                                      | D       | 84      |
| 24              | Ben    |                                                                                      | B       | 84      |
|                 | S#     |                                                                                      | D       | 84      |
| 25              | Ben    |                                                                                      | B       | 84      |
|                 | S#     |                                                                                      | D       | 84      |
| 26              | Ben    |                                                                                      | B       | 84      |
|                 | S#     |                                                                                      | D       | 84      |
| 27              | Ben    |                                                                                      | B       | 84      |
|                 | S#     |                                                                                      | D       | 84      |
| 28              | Ben    |                                                                                      | B       | 84      |
|                 | S#     |                                                                                      | D       | 84      |
| 29              | Ben    |                                                                                      | B       | 84      |
|                 | S#     |                                                                                      | D       | 84      |
| 30              | Ben    |                                                                                      | B       | 84      |
|                 | S#     |                                                                                      | D       | 84      |
| 31              | Ben    |                                                                                      | B       | 84      |
|                 | S#     |                                                                                      | D       | 84      |
| 32              | Ben    |                                                                                      | B       | 84      |
|                 | S#     |                                                                                      | D       | 84      |
| 33              | Ben    |                                                                                      | B       | 84      |
|                 | S#     |                                                                                      | D       | 84      |
| 34              | Ben    |                                                                                      | B       | 84      |
|                 | S#     |                                                                                      | D       | 84      |
| 35              | Ben    |                                                                                      | B       | 84      |
|                 | S#     |                                                                                      | D       | 84      |
| 36              | Ben    |                                                                                      | B       | 84      |
|                 | S#     |                                                                                      | D       | 84      |
| 37              | Ben    |                                                                                      | B       | 84      |
|                 | S#     |                                                                                      | D       | 84      |
| 38              | Ben    |                                                                                      | B       | 84      |
|                 | S#     |                                                                                      | D       | 84      |
| 39              | Ben    |                                                                                      | B       | 84      |
|                 | S#     |                                                                                      | D       | 84      |
| 40              | Ben    |                                                                                      | B       | 84      |
|                 | S#     |                                                                                      | D       | 84      |
| 41              | Ben    |                                                                                      | B       | 84      |
|                 | S#     |                                                                                      | D       | 84      |
| 42              | Ben    |                                                                                      | B       | 84      |
|                 | S#     |                                                                                      | D       | 84      |
| 43              | Ben    |                                                                                      | B       | 84      |
|                 | S#     |                                                                                      | D       | 84      |
| 44              | Ben    |                                                                                      | B       | 84      |
|                 | S#     |                                                                                      | D       | 84      |
| 45              | Ben    |                                                                                      | B       | 84      |
|                 | S#     |                                                                                      | D       | 84      |
| 46              | Ben    |                                                                                      | B       | 84      |
|                 | S#     |                                                                                      | D       | 84      |
| 47              | Ben    |                                                                                      | B       | 84      |
|                 | S#     |                                                                                      | D       | 84      |
| 48              | Ben    |                                                                                      | B       | 84      |
|                 | S#     |                                                                                      | D       | 84      |
| 49              | Ben    |                                                                                      | B       | 84      |
|                 | S#     |                                                                                      | D       | 84      |
| 50              | Ben    |                                                                                      | B       | 84      |
|                 | S#     |                                                                                      | D       | 84      |
| 51              | Ben    |                                                                                      | B       | 84      |
|                 | S#     |                                                                                      | D       | 84      |
| 52              | Ben    |                                                                                      | B       | 84      |
|                 | S#     |                                                                                      | D       | 84      |
| 53              | Ben    |                                                                                      | B       | 84      |
|                 | S#     |                                                                                      | D       | 84      |
| 54              | Ben    |                                                                                      | B       | 84      |
|                 | S#     |                                                                                      | D       | 84      |
| <b>Averages</b> |        |                                                                                      | Ben     | 78.67   |
|                 |        |                                                                                      | S#      | 83.63   |

# Lav with p97 in Chicken

|     |   |         |         |
|-----|---|---------|---------|
|     |   | p97     |         |
|     |   | C       | D       |
| Lav | A | 0, 0    | 100, 33 |
|     | B | 33, 100 | 84, 84  |

| Round           | Player | Messages Sent                                                     | Actions | Payoffs |
|-----------------|--------|-------------------------------------------------------------------|---------|---------|
| 1               | Lav    | This round, let's play BD.                                        | B       | 84      |
|                 | p97    |                                                                   | D       | 84      |
| 2               | Lav    | Excellent. Sweet. We are getting rich. This round, let's play BD. | B       | 33      |
|                 | p97    | This round, let's play BC.                                        | C       | 100     |
| 3               | Lav    | This round, let's play AD.                                        | A       | 100     |
|                 | p97    | This round, let's play BD.                                        | D       | 33      |
| 4               | Lav    | Let's alternate between AD and BD.                                | B       | 84      |
|                 | p97    | This round, let's play BD. Excellent.                             | D       | 84      |
| 5               | Lav    | Excellent. Let's always play BD. We can both do better than this. | B       | 84      |
|                 | p97    | Sweet. We are getting rich.                                       | D       | 84      |
| 6               | Lav    | Excellent. Let's always play BD. We can both do better than this. | B       | 84      |
|                 | p97    | Excellent.                                                        | D       | 84      |
| 7               | Lav    | Excellent. Let's always play BD.                                  | B       | 84      |
|                 | p97    | Sweet. We are getting rich. Excellent.                            | D       | 84      |
| 8               | Lav    | Excellent. Sweet. We are getting rich.                            | B       | 84      |
|                 | p97    | Let's always play BD.                                             | D       | 84      |
| 9               | Lav    | Let's always play BD.                                             | B       | 84      |
|                 | p97    | Excellent.                                                        | D       | 84      |
| 10              | Lav    | Excellent.                                                        | B       | 84      |
|                 | p97    |                                                                   | D       | 84      |
| 11              | Lav    | This round, let's play BD.                                        | B       | 84      |
|                 | p97    |                                                                   | D       | 84      |
| 12              | Lav    | Excellent.                                                        | B       | 84      |
|                 | p97    | Excellent.                                                        | D       | 84      |
| 13              | Lav    | Excellent.                                                        | B       | 84      |
|                 | p97    | Sweet. We are getting rich.                                       | D       | 84      |
| 14              | Lav    | Excellent.                                                        | B       | 84      |
|                 | p97    | Sweet. We are getting rich.                                       | D       | 84      |
| 15              | Lav    | Sweet. We are getting rich.                                       | B       | 84      |
|                 | p97    | Excellent.                                                        | D       | 84      |
| 16              | Lav    | Excellent.                                                        | B       | 84      |
|                 | p97    | Excellent.                                                        | D       | 84      |
| 17              | Lav    | Excellent.                                                        | B       | 84      |
|                 | p97    | Excellent.                                                        | D       | 84      |
| 18              | Lav    | Excellent.                                                        | B       | 84      |
|                 | p97    | Sweet. We are getting rich. Excellent.                            | D       | 84      |
| 19              | Lav    | Sweet. We are getting rich.                                       | B       | 84      |
|                 | p97    | Excellent.                                                        | D       | 84      |
| 20              | Lav    | Sweet. We are getting rich.                                       | B       | 84      |
|                 | p97    | Excellent.                                                        | D       | 84      |
| 21              | Lav    | Excellent.                                                        | B       | 84      |
|                 | p97    | Excellent.                                                        | D       | 84      |
| 22              | Lav    | Sweet. We are getting rich.                                       | B       | 84      |
|                 | p97    | Excellent.                                                        | D       | 84      |
| 23              | Lav    | Sweet. We are getting rich.                                       | B       | 84      |
|                 | p97    | Sweet. We are getting rich. Excellent.                            | D       | 84      |
| 24              | Lav    | Excellent. Sweet. We are getting rich.                            | B       | 84      |
|                 | p97    |                                                                   | D       | 84      |
| 25              | Lav    | Excellent.                                                        | B       | 84      |
|                 | p97    | Excellent.                                                        | D       | 84      |
| 26              | Lav    | Excellent.                                                        | B       | 84      |
|                 | p97    | Excellent.                                                        | D       | 84      |
| 27              | Lav    | Excellent. Sweet. We are getting rich.                            | B       | 84      |
|                 | p97    | Excellent.                                                        | D       | 84      |
| 28              | Lav    | Excellent.                                                        | B       | 84      |
|                 | p97    | Excellent.                                                        | D       | 84      |
| 29              | Lav    | Excellent.                                                        | B       | 84      |
|                 | p97    | Excellent.                                                        | D       | 84      |
| 30              | Lav    | Excellent.                                                        | B       | 84      |
|                 | p97    | Sweet. We are getting rich. Excellent.                            | D       | 84      |
| 31              | Lav    | Sweet. We are getting rich. Excellent.                            | B       | 84      |
|                 | p97    | Sweet. We are getting rich.                                       | D       | 84      |
| 32              | Lav    | Excellent.                                                        | B       | 84      |
|                 | p97    | Excellent.                                                        | D       | 84      |
| 33              | Lav    | Excellent.                                                        | B       | 84      |
|                 | p97    | Excellent.                                                        | D       | 84      |
| 34              | Lav    | Excellent.                                                        | B       | 84      |
|                 | p97    | Excellent.                                                        | D       | 84      |
| 35              | Lav    | Excellent.                                                        | B       | 84      |
|                 | p97    | Sweet. We are getting rich.                                       | D       | 84      |
| 36              | Lav    | Excellent.                                                        | B       | 84      |
|                 | p97    | Excellent.                                                        | D       | 84      |
| 37              | Lav    | Excellent.                                                        | B       | 84      |
|                 | p97    | Excellent.                                                        | D       | 84      |
| 38              | Lav    | Excellent.                                                        | B       | 84      |
|                 | p97    | Excellent. Sweet. We are getting rich.                            | D       | 84      |
| 39              | Lav    | Excellent.                                                        | B       | 84      |
|                 | p97    | Sweet. We are getting rich.                                       | D       | 84      |
| 40              | Lav    | Excellent.                                                        | B       | 84      |
|                 | p97    | Sweet. We are getting rich.                                       | D       | 84      |
| 41              | Lav    | Excellent.                                                        | B       | 84      |
|                 | p97    | Sweet. We are getting rich.                                       | D       | 84      |
| 42              | Lav    | Sweet. We are getting rich.                                       | B       | 84      |
|                 | p97    | Excellent.                                                        | D       | 84      |
| 43              | Lav    | Excellent.                                                        | B       | 84      |
|                 | p97    | Excellent.                                                        | D       | 84      |
| 44              | Lav    | Excellent.                                                        | B       | 84      |
|                 | p97    | Excellent.                                                        | D       | 84      |
| 45              | Lav    | Excellent.                                                        | B       | 84      |
|                 | p97    | Sweet. We are getting rich.                                       | D       | 84      |
| 46              | Lav    | Sweet. We are getting rich.                                       | B       | 84      |
|                 | p97    | Excellent.                                                        | D       | 84      |
| 47              | Lav    | Excellent.                                                        | B       | 84      |
|                 | p97    | Excellent.                                                        | D       | 84      |
| 48              | Lav    | Excellent.                                                        | B       | 84      |
|                 | p97    | Sweet. We are getting rich. Excellent.                            | D       | 84      |
| 49              | Lav    | Excellent.                                                        | B       | 84      |
|                 | p97    | Excellent. Sweet. We are getting rich.                            | D       | 84      |
| 50              | Lav    | Excellent.                                                        | B       | 84      |
|                 | p97    | Sweet. We are getting rich.                                       | D       | 84      |
| 51              | Lav    | Sweet. We are getting rich.                                       | B       | 84      |
|                 | p97    | Excellent.                                                        | D       | 84      |
| 52              | Lav    | Excellent.                                                        | B       | 84      |
|                 | p97    | Excellent.                                                        | D       | 84      |
| 53              | Lav    | Excellent.                                                        | B       | 84      |
|                 | p97    | Excellent.                                                        | D       | 84      |
| 54              | Lav    | Excellent.                                                        | B       | 84      |
|                 | p97    | Excellent.                                                        | D       | 84      |
| <b>Averages</b> |        |                                                                   | Lav     | 83.35   |
|                 |        |                                                                   | p97     | 83.35   |

osenat with Ninkas in Chicken

|        |        |         |        |
|--------|--------|---------|--------|
|        | Ninkas |         |        |
|        | A      | C       | D      |
| osenat | 0, 0   | 100, 33 |        |
|        | B      | 33, 100 | 84, 84 |

| Round           | Player | Messages Sent                                    | Actions | Payoffs      |
|-----------------|--------|--------------------------------------------------|---------|--------------|
| 1               | osenat |                                                  | B       | 33           |
|                 | Ninkas | Let's always play AC.                            | C       | 100          |
| 2               | osenat | Sweet. We are getting rich.                      | B       | 33           |
|                 | Ninkas | Let's always play AC.                            | C       | 100          |
| 3               | osenat | Let's always play AD.                            | A       | 100          |
|                 | Ninkas | Let's always play BD. This round, let's play BD. | D       | 33           |
| 4               | osenat | Excellent.                                       | A       | 100          |
|                 | Ninkas | Let's always play BD.                            | D       | 33           |
| 5               | osenat | Excellent.                                       | A       | 0            |
|                 | Ninkas | This round, let's play AC.                       | C       | 0            |
| 6               | osenat | I'm changing my strategy.                        | B       | 84           |
|                 | Ninkas | We can both do better than this.                 | D       | 84           |
| 7               | osenat | Sweet. We are getting rich.                      | A       | 100          |
|                 | Ninkas | Excellent.                                       | D       | 33           |
| 8               | osenat | Excellent.                                       | A       | 100          |
|                 | Ninkas |                                                  | D       | 33           |
| 9               | osenat | Excellent.                                       | B       | 33           |
|                 | Ninkas | This round, let's play AC.                       | C       | 100          |
| 10              | osenat | I'm changing my strategy.                        | A       | 100          |
|                 | Ninkas | Excellent.                                       | D       | 33           |
| 11              | osenat | Excellent.                                       | A       | 0            |
|                 | Ninkas | I'm changing my strategy.                        | C       | 0            |
| 12              | osenat | I forgive you.                                   | B       | 33           |
|                 | Ninkas | This round, let's play AC.                       | C       | 100          |
| 13              | osenat | I'm changing my strategy.                        | A       | 100          |
|                 | Ninkas | Excellent.                                       | D       | 33           |
| 14              | osenat | Excellent.                                       | B       | 33           |
|                 | Ninkas | This round, let's play AC.                       | C       | 100          |
| 15              | osenat | I'm changing my strategy.                        | A       | 100          |
|                 | Ninkas | Excellent.                                       | D       | 33           |
| 16              | osenat | Excellent.                                       | B       | 33           |
|                 | Ninkas | This round, let's play AC.                       | C       | 100          |
| 17              | osenat | I'm changing my strategy.                        | B       | 84           |
|                 | Ninkas | I'm changing my strategy.                        | D       | 84           |
| 18              | osenat | Excellent.                                       | B       | 33           |
|                 | Ninkas | This round, let's play AC.                       | C       | 100          |
| 19              | osenat | I'm changing my strategy.                        | B       | 84           |
|                 | Ninkas | I'm changing my strategy.                        | D       | 84           |
| 20              | osenat | Excellent.                                       | B       | 33           |
|                 | Ninkas | This round, let's play AC.                       | C       | 100          |
| 21              | osenat | I'm changing my strategy.                        | B       | 84           |
|                 | Ninkas | I'm changing my strategy.                        | D       | 84           |
| 22              | osenat | I forgive you.                                   | B       | 33           |
|                 | Ninkas | This round, let's play AC.                       | C       | 100          |
| 23              | osenat | I forgive you.                                   | B       | 84           |
|                 | Ninkas | I'm changing my strategy.                        | D       | 84           |
| 24              | osenat | Excellent.                                       | B       | 33           |
|                 | Ninkas | This round, let's play AC.                       | C       | 100          |
| 25              | osenat | We can both do better than this.                 | B       | 84           |
|                 | Ninkas | I'm changing my strategy.                        | D       | 84           |
| 26              | osenat | I forgive you.                                   | A       | 100          |
|                 | Ninkas | Let's always play BD.                            | D       | 33           |
| 27              | osenat | Excellent.                                       | A       | 100          |
|                 | Ninkas | We can both do better than this.                 | D       | 33           |
| 28              | osenat | Excellent.                                       | B       | 33           |
|                 | Ninkas | This round, let's play AC.                       | C       | 100          |
| 29              | osenat |                                                  | A       | 100          |
|                 | Ninkas | Let's always play BD.                            | D       | 33           |
| 30              | osenat | I forgive you.                                   | A       | 100          |
|                 | Ninkas | Let's always play BD.                            | D       | 33           |
| 31              | osenat | I forgive you.                                   | A       | 0            |
|                 | Ninkas | You betrayed me.                                 | C       | 0            |
| 32              | osenat | Curse you.                                       | A       | 100          |
|                 | Ninkas | We can both do better than this.                 | D       | 33           |
| 33              | osenat | Excellent.                                       | A       | 100          |
|                 | Ninkas | Curse you. Let's always play BD.                 | D       | 33           |
| 34              | osenat | Excellent.                                       | B       | 84           |
|                 | Ninkas | Don't play A.                                    | D       | 84           |
| 35              | osenat | Sweet. We are getting rich.                      | A       | 100          |
|                 | Ninkas | Let's always play BD.                            | D       | 33           |
| 36              | osenat | I forgive you.                                   | B       | 84           |
|                 | Ninkas | Don't play A.                                    | D       | 84           |
| 37              | osenat | Sweet. We are getting rich.                      | B       | 84           |
|                 | Ninkas | Don't play A.                                    | D       | 84           |
| 38              | osenat | Give me another chance.                          | A       | 100          |
|                 | Ninkas | Excellent.                                       | D       | 33           |
| 39              | osenat | Sweet. We are getting rich.                      | B       | 33           |
|                 | Ninkas | Don't play A.                                    | C       | 100          |
| 40              | osenat | Curse you.                                       | A       | 100          |
|                 | Ninkas | Let's always play BD.                            | D       | 33           |
| 41              | osenat | Excellent.                                       | B       | 33           |
|                 | Ninkas | Curse you.                                       | C       | 100          |
| 42              | osenat | We can both do better than this.                 | A       | 100          |
|                 | Ninkas | This round, let's play AD.                       | D       | 33           |
| 43              | osenat | Excellent.                                       | A       | 0            |
|                 | Ninkas | This round, let's play BC.                       | C       | 0            |
| 44              | osenat | Curse you.                                       | B       | 33           |
|                 | Ninkas | This round, let's play BC.                       | C       | 100          |
| 45              | osenat | We can both do better than this.                 | A       | 100          |
|                 | Ninkas | This round, let's play AD.                       | D       | 33           |
| 46              | osenat | Excellent.                                       | B       | 33           |
|                 | Ninkas | This round, let's play BC.                       | C       | 100          |
| 47              | osenat | I forgive you.                                   | A       | 100          |
|                 | Ninkas | This round, let's play AD.                       | D       | 33           |
| 48              | osenat | Excellent.                                       | B       | 33           |
|                 | Ninkas | This round, let's play BC.                       | C       | 100          |
| 49              | osenat | We can both do better than this.                 | A       | 100          |
|                 | Ninkas | This round, let's play AD.                       | D       | 33           |
| 50              | osenat | Excellent.                                       | B       | 33           |
|                 | Ninkas | This round, let's play BC.                       | C       | 100          |
| 51              | osenat | We can both do better than this.                 | A       | 100          |
|                 | Ninkas | Let's alternate between BC and AD.               | D       | 33           |
| 52              | osenat | Excellent.                                       | B       | 33           |
|                 | Ninkas | This round, let's play AC.                       | C       | 100          |
| 53              | osenat | I forgive you.                                   | A       | 100          |
|                 | Ninkas |                                                  | D       | 33           |
| 54              | osenat | Excellent.                                       | A       | 0            |
|                 | Ninkas | Excellent.                                       | C       | 0            |
| <b>Averages</b> |        |                                                  |         | osenat 65.74 |
|                 |        |                                                  |         | Ninkas 60.78 |

## shunik with S# in Chicken

|        |   |         |         |
|--------|---|---------|---------|
|        |   | S#      |         |
|        |   | C       | D       |
| shunik | A | 0, 0    | 100, 33 |
|        | B | 33, 100 | 84, 84  |

| Round           | Player | Messages Sent                                                                                                      | Actions | Payoffs |
|-----------------|--------|--------------------------------------------------------------------------------------------------------------------|---------|---------|
| 1               | shunik |                                                                                                                    | B       | 84      |
|                 | S#     |                                                                                                                    | D       | 84      |
| 2               | shunik | Excellent.                                                                                                         | B       | 33      |
|                 | S#     | Excellent.                                                                                                         | C       | 100     |
| 3               | shunik |                                                                                                                    | A       | 0       |
|                 | S#     | Excellent.                                                                                                         | C       | 0       |
| 4               | shunik |                                                                                                                    | B       | 84      |
|                 | S#     |                                                                                                                    | D       | 84      |
| 5               | shunik | I'm changing my strategy. We can both do better than this. Let's always play BD. Do as I say or I will punish you. | B       | 84      |
|                 | S#     |                                                                                                                    | D       | 84      |
| 6               | shunik |                                                                                                                    | B       | 84      |
|                 | S#     | Excellent.                                                                                                         | D       | 84      |
| 7               | shunik | I accept your last proposal.                                                                                       | B       | 84      |
|                 | S#     | Excellent.                                                                                                         | D       | 84      |
| 8               | shunik |                                                                                                                    | B       | 84      |
|                 | S#     | Excellent.                                                                                                         | D       | 84      |
| 9               | shunik |                                                                                                                    | B       | 84      |
|                 | S#     |                                                                                                                    | D       | 84      |
| 10              | shunik | Sweet. We are getting rich.                                                                                        | B       | 84      |
|                 | S#     | Sweet. We are getting rich.                                                                                        | D       | 84      |
| 11              | shunik | We can both do better than this.                                                                                   | B       | 84      |
|                 | S#     |                                                                                                                    | D       | 84      |
| 12              | shunik |                                                                                                                    | B       | 84      |
|                 | S#     |                                                                                                                    | D       | 84      |
| 13              | shunik |                                                                                                                    | B       | 84      |
|                 | S#     |                                                                                                                    | D       | 84      |
| 14              | shunik |                                                                                                                    | B       | 84      |
|                 | S#     |                                                                                                                    | D       | 84      |
| 15              | shunik |                                                                                                                    | B       | 84      |
|                 | S#     |                                                                                                                    | D       | 84      |
| 16              | shunik |                                                                                                                    | B       | 84      |
|                 | S#     |                                                                                                                    | D       | 84      |
| 17              | shunik |                                                                                                                    | B       | 84      |
|                 | S#     |                                                                                                                    | D       | 84      |
| 18              | shunik |                                                                                                                    | B       | 84      |
|                 | S#     |                                                                                                                    | D       | 84      |
| 19              | shunik |                                                                                                                    | B       | 84      |
|                 | S#     |                                                                                                                    | D       | 84      |
| 20              | shunik | Excellent.                                                                                                         | B       | 84      |
|                 | S#     |                                                                                                                    | D       | 84      |
| 21              | shunik |                                                                                                                    | B       | 84      |
|                 | S#     |                                                                                                                    | D       | 84      |
| 22              | shunik |                                                                                                                    | B       | 84      |
|                 | S#     |                                                                                                                    | D       | 84      |
| 23              | shunik |                                                                                                                    | B       | 84      |
|                 | S#     |                                                                                                                    | D       | 84      |
| 24              | shunik |                                                                                                                    | B       | 84      |
|                 | S#     |                                                                                                                    | D       | 84      |
| 25              | shunik |                                                                                                                    | B       | 84      |
|                 | S#     |                                                                                                                    | D       | 84      |
| 26              | shunik |                                                                                                                    | B       | 84      |
|                 | S#     |                                                                                                                    | D       | 84      |
| 27              | shunik |                                                                                                                    | B       | 84      |
|                 | S#     |                                                                                                                    | D       | 84      |
| 28              | shunik |                                                                                                                    | B       | 84      |
|                 | S#     |                                                                                                                    | D       | 84      |
| 29              | shunik |                                                                                                                    | B       | 84      |
|                 | S#     |                                                                                                                    | D       | 84      |
| 30              | shunik | Sweet. We are getting rich.                                                                                        | B       | 84      |
|                 | S#     |                                                                                                                    | D       | 84      |
| 31              | shunik |                                                                                                                    | B       | 84      |
|                 | S#     |                                                                                                                    | D       | 84      |
| 32              | shunik |                                                                                                                    | B       | 84      |
|                 | S#     |                                                                                                                    | D       | 84      |
| 33              | shunik |                                                                                                                    | B       | 84      |
|                 | S#     |                                                                                                                    | D       | 84      |
| 34              | shunik |                                                                                                                    | B       | 84      |
|                 | S#     |                                                                                                                    | D       | 84      |
| 35              | shunik |                                                                                                                    | B       | 84      |
|                 | S#     |                                                                                                                    | D       | 84      |
| 36              | shunik |                                                                                                                    | B       | 84      |
|                 | S#     |                                                                                                                    | D       | 84      |
| 37              | shunik |                                                                                                                    | B       | 84      |
|                 | S#     |                                                                                                                    | D       | 84      |
| 38              | shunik |                                                                                                                    | B       | 84      |
|                 | S#     |                                                                                                                    | D       | 84      |
| 39              | shunik |                                                                                                                    | B       | 84      |
|                 | S#     |                                                                                                                    | D       | 84      |
| 40              | shunik |                                                                                                                    | B       | 84      |
|                 | S#     |                                                                                                                    | D       | 84      |
| 41              | shunik |                                                                                                                    | B       | 84      |
|                 | S#     |                                                                                                                    | D       | 84      |
| 42              | shunik |                                                                                                                    | B       | 84      |
|                 | S#     |                                                                                                                    | D       | 84      |
| 43              | shunik |                                                                                                                    | B       | 84      |
|                 | S#     |                                                                                                                    | D       | 84      |
| 44              | shunik | Excellent.                                                                                                         | B       | 84      |
|                 | S#     |                                                                                                                    | D       | 84      |
| 45              | shunik |                                                                                                                    | B       | 84      |
|                 | S#     |                                                                                                                    | D       | 84      |
| 46              | shunik |                                                                                                                    | B       | 84      |
|                 | S#     |                                                                                                                    | D       | 84      |
| 47              | shunik |                                                                                                                    | B       | 84      |
|                 | S#     |                                                                                                                    | D       | 84      |
| 48              | shunik |                                                                                                                    | B       | 84      |
|                 | S#     |                                                                                                                    | D       | 84      |
| 49              | shunik |                                                                                                                    | B       | 84      |
|                 | S#     |                                                                                                                    | D       | 84      |
| 50              | shunik |                                                                                                                    | B       | 84      |
|                 | S#     |                                                                                                                    | D       | 84      |
| 51              | shunik | Sweet. We are getting rich.                                                                                        | B       | 84      |
|                 | S#     |                                                                                                                    | D       | 84      |
| 52              | shunik |                                                                                                                    | B       | 84      |
|                 | S#     |                                                                                                                    | D       | 84      |
| 53              | shunik |                                                                                                                    | B       | 84      |
|                 | S#     |                                                                                                                    | D       | 84      |
| 54              | shunik |                                                                                                                    | B       | 84      |
|                 | S#     |                                                                                                                    | D       | 84      |
| <b>Averages</b> |        |                                                                                                                    | shunik  | 81.50   |
|                 |        |                                                                                                                    | S#      | 82.74   |



## ABL with Qustro in the Alternator Game

|     |   | Qustro  |        |         |
|-----|---|---------|--------|---------|
|     |   | D       | E      | F       |
| ABL | A | 0, 0    | 35, 70 | 100, 40 |
|     | B | 70, 35  | 10, 10 | 45, 30  |
|     | C | 40, 100 | 30, 45 | 40, 40  |

| Round           | Player | Messages Sent                                                                                                                         | Actions | Payoffs |
|-----------------|--------|---------------------------------------------------------------------------------------------------------------------------------------|---------|---------|
| 1               | ABL    | Let's always play AF.                                                                                                                 | A       | 100     |
|                 | Qustro | Let's alternate between CD and AF.                                                                                                    | F       | 40      |
| 2               | ABL    | Excellent.                                                                                                                            | A       | 0       |
|                 | Qustro | This round, let's play CD.                                                                                                            | D       | 0       |
| 3               | ABL    | Curse you.                                                                                                                            | C       | 40      |
|                 | Qustro | Curse you.                                                                                                                            | D       | 100     |
| 4               | ABL    | Excellent. Sweet. We are getting rich.                                                                                                | A       | 100     |
|                 | Qustro | Sweet. We are getting rich. Let's alternate between CD and AF.                                                                        | F       | 40      |
| 5               | ABL    | Curse you.                                                                                                                            | C       | 40      |
|                 | Qustro | Sweet. We are getting rich.                                                                                                           | D       | 100     |
| 6               | ABL    | Let's always play CD.                                                                                                                 | C       | 40      |
|                 | Qustro | Sweet. We are getting rich.                                                                                                           | F       | 45      |
| 7               | ABL    | Curse you. Let's always play CD.                                                                                                      | C       | 40      |
|                 | Qustro | Curse you.                                                                                                                            | D       | 100     |
| 8               | ABL    | Excellent.                                                                                                                            | C       | 40      |
|                 | Qustro | Excellent.                                                                                                                            | D       | 100     |
| 9               | ABL    | Excellent. Sweet. We are getting rich.                                                                                                | A       | 0       |
|                 | Qustro | Excellent.                                                                                                                            | D       | 0       |
| 10              | ABL    | Let's always play AE.                                                                                                                 | C       | 30      |
|                 | Qustro | Curse you.                                                                                                                            | E       | 45      |
| 11              | ABL    | Let's always play AE.                                                                                                                 | C       | 40      |
|                 | Qustro | Let's alternate between CD and AF. Do as I say or I will punish you.                                                                  | F       | 40      |
| 12              | ABL    | Curse you.                                                                                                                            | A       | 0       |
|                 | Qustro | You betrayed me. Curse you. You will pay for this. I don't trust you. That's not fair.                                                | D       | 0       |
| 13              | ABL    | Let's always play CD.                                                                                                                 | C       | 40      |
|                 | Qustro | Curse you. You betrayed me. You will pay for this. In your face!                                                                      | D       | 100     |
| 14              | ABL    | Excellent.                                                                                                                            | A       | 0       |
|                 | Qustro | Sweet. We are getting rich.                                                                                                           | D       | 0       |
| 15              | ABL    | Curse you. I don't accept your proposal.                                                                                              | A       | 100     |
|                 | Qustro | You betrayed me. Curse you. You will pay for this. In your face! Let's alternate between CD and AF. Do as I say or I will punish you. | F       | 40      |
| 16              | ABL    | You betrayed me. You will pay for this.                                                                                               | C       | 40      |
|                 | Qustro | Excellent.                                                                                                                            | D       | 100     |
| 17              | ABL    | Excellent.                                                                                                                            | B       | 45      |
|                 | Qustro | Excellent.                                                                                                                            | F       | 30      |
| 18              | ABL    | Curse you. You betrayed me. You will pay for this.                                                                                    | B       | 70      |
|                 | Qustro | Curse you. You betrayed me. You will pay for this. In your face! Let's alternate between CD and AF. Do as I say or I will punish you. | D       | 35      |
| 19              | ABL    | You betrayed me. Curse you. You will pay for this.                                                                                    | C       | 40      |
|                 | Qustro | You betrayed me. Curse you. You will pay for this. In your face! Let's alternate between CD and AF. Do as I say or I will punish you. | F       | 40      |
| 20              | ABL    | Let's always play BE.                                                                                                                 | A       | 0       |
|                 | Qustro | Don't play B.                                                                                                                         | D       | 0       |
| 21              | ABL    | I accept your last proposal.                                                                                                          | C       | 40      |
|                 | Qustro | You betrayed me.                                                                                                                      | F       | 40      |
| 22              | ABL    | I don't accept your proposal.                                                                                                         | C       | 30      |
|                 | Qustro | This round, let's play CD.                                                                                                            | E       | 45      |
| 23              | ABL    | I don't trust you. Curse you. You betrayed me. You will pay for this.                                                                 | C       | 40      |
|                 | Qustro | Let's alternate between CD and AF.                                                                                                    | F       | 40      |
| 24              | ABL    | I don't accept your proposal. I don't trust you.                                                                                      | A       | 100     |
|                 | Qustro | That's not fair.                                                                                                                      | F       | 40      |
| 25              | ABL    | I don't accept your proposal.                                                                                                         | A       | 100     |
|                 | Qustro | Excellent. Sweet. We are getting rich.                                                                                                | F       | 40      |
| 26              | ABL    | Let's always play AE.                                                                                                                 | C       | 30      |
|                 | Qustro | Excellent. Sweet. We are getting rich.                                                                                                | E       | 45      |
| 27              | ABL    | Excellent.                                                                                                                            | A       | 100     |
|                 | Qustro | You betrayed me. Let's alternate between CD and AF. Do as I say or I will punish you.                                                 | F       | 40      |
| 28              | ABL    | That's not fair.                                                                                                                      | C       | 40      |
|                 | Qustro | This round, let's play CD.                                                                                                            | D       | 100     |
| 29              | ABL    | Excellent. Sweet. We are getting rich.                                                                                                | A       | 100     |
|                 | Qustro | This round, let's play AF.                                                                                                            | F       | 40      |
| 30              | ABL    | This round, let's play CD.                                                                                                            | C       | 40      |
|                 | Qustro | This round, let's play CD.                                                                                                            | D       | 100     |
| 31              | ABL    | I accept your last proposal. Sweet. We are getting rich.                                                                              | A       | 100     |
|                 | Qustro | Let's alternate between CD and AF.                                                                                                    | F       | 40      |
| 32              | ABL    | Excellent. Sweet. We are getting rich.                                                                                                | C       | 40      |
|                 | Qustro | Sweet. We are getting rich. Excellent.                                                                                                | D       | 100     |
| 33              | ABL    | Excellent. Sweet. We are getting rich.                                                                                                | A       | 100     |
|                 | Qustro | Sweet. We are getting rich. Excellent.                                                                                                | F       | 40      |
| 34              | ABL    | Excellent. Sweet. We are getting rich.                                                                                                | C       | 40      |
|                 | Qustro | Excellent. Sweet. We are getting rich.                                                                                                | D       | 100     |
| 35              | ABL    | I accept your last proposal. Excellent.                                                                                               | B       | 45      |
|                 | Qustro | Excellent. Sweet. We are getting rich.                                                                                                | F       | 30      |
| 36              | ABL    | I accept your last proposal.                                                                                                          | C       | 40      |
|                 | Qustro | Let's alternate between CD and AF. Do as I say or I will punish you.                                                                  | D       | 100     |
| 37              | ABL    | Excellent. Sweet. We are getting rich. Let's always play AD.                                                                          | A       | 100     |
|                 | Qustro | Excellent. Sweet. We are getting rich.                                                                                                | F       | 40      |
| 38              | ABL    | Excellent. Sweet. We are getting rich.                                                                                                | B       | 70      |
|                 | Qustro | Excellent. Sweet. We are getting rich.                                                                                                | D       | 35      |
| 39              | ABL    | Let's always play AF.                                                                                                                 | C       | 40      |
|                 | Qustro | Let's alternate between CD and AF. Do as I say or I will punish you.                                                                  | D       | 100     |
| 40              | ABL    | Excellent. Don't play E.                                                                                                              | B       | 45      |
|                 | Qustro | Excellent. Sweet. We are getting rich.                                                                                                | F       | 30      |
| 41              | ABL    | Give me another chance.                                                                                                               | B       | 70      |
|                 | Qustro | Sweet. We are getting rich. Excellent.                                                                                                | D       | 35      |
| 42              | ABL    | Sweet. We are getting rich. Excellent.                                                                                                | C       | 40      |
|                 | Qustro | Let's alternate between CD and AF. Do as I say or I will punish you.                                                                  | F       | 40      |
| 43              | ABL    | I don't trust you.                                                                                                                    | C       | 40      |
|                 | Qustro | Sweet. We are getting rich.                                                                                                           | D       | 100     |
| 44              | ABL    | Sweet. We are getting rich.                                                                                                           | A       | 100     |
|                 | Qustro | Let's always play AE.                                                                                                                 | F       | 40      |
| 45              | ABL    | Let's always play AE.                                                                                                                 | A       | 0       |
|                 | Qustro | Do as I say or I will punish you.                                                                                                     | D       | 0       |
| 46              | ABL    | Do as I say or I will punish you.                                                                                                     | A       | 100     |
|                 | Qustro | Curse you.                                                                                                                            | F       | 40      |
| 47              | ABL    | That's not fair.                                                                                                                      | C       | 40      |
|                 | Qustro | That's not fair.                                                                                                                      | D       | 100     |
| <b>Averages</b> |        |                                                                                                                                       | ABL     | 51.81   |
|                 |        |                                                                                                                                       | Qustro  | 52.13   |

## S# with NICK in the Alternator Game

|    |   | NICK    |        |         |
|----|---|---------|--------|---------|
|    |   | D       | E      | F       |
| S# | A | 0, 0    | 35, 70 | 100, 40 |
|    | B | 70, 35  | 10, 10 | 45, 30  |
|    | C | 40, 100 | 30, 45 | 40, 40  |

| Round           | Player | Messages Sent                                                                                                                | Actions | Payoffs |
|-----------------|--------|------------------------------------------------------------------------------------------------------------------------------|---------|---------|
| 1               | S#     |                                                                                                                              | A       | 100     |
|                 | NICK   | Let's alternate between CD and AF.                                                                                           | F       | 40      |
| 2               | S#     | I accept your last proposal. Let's alternate between CD and AF. Do as I say or I will punish you. This round, let's play CD. | C       | 40      |
|                 | NICK   | Let's alternate between CD and AF.                                                                                           | D       | 100     |
| 3               | S#     | Excellent. This round, let's play AF.                                                                                        | A       | 100     |
|                 | NICK   | Excellent.                                                                                                                   | F       | 40      |
| 4               | S#     | I'm changing my strategy. Let's always play AF. Do as I say or I will punish you.                                            | A       | 35      |
|                 | NICK   | This round, let's play CD.                                                                                                   | E       | 70      |
| 5               | S#     | Curse you. You will pay for this.                                                                                            | B       | 45      |
|                 | NICK   | Let's alternate between CD and AF. This round, let's play AF.                                                                | F       | 30      |
| 6               | S#     | In your face! I don't accept your proposal. That's not fair.                                                                 | B       | 70      |
|                 | NICK   | We can both do better than this. Let's alternate between CD and AF. This round, let's play CD.                               | D       | 35      |
| 7               | S#     | In your face! I don't accept your proposal. That's not fair.                                                                 | B       | 45      |
|                 | NICK   |                                                                                                                              | F       | 30      |
| 8               | S#     | In your face!                                                                                                                | B       | 70      |
|                 | NICK   |                                                                                                                              | D       | 35      |
| 9               | S#     | In your face!                                                                                                                | B       | 10      |
|                 | NICK   |                                                                                                                              | E       | 10      |
| 10              | S#     | In your face! I forgive you. Let's always play AF. Do as I say or I will punish you.                                         | A       | 100     |
|                 | NICK   | We can both do better than this.                                                                                             | F       | 40      |
| 11              | S#     | I accept your last proposal. Let's alternate between CD and AF. This round, let's play CD. Do as I say or I will punish you. | C       | 40      |
|                 | NICK   | Let's alternate between AF and CD.                                                                                           | D       | 100     |
| 12              | S#     | Excellent. This round, let's play AF.                                                                                        | A       | 100     |
|                 | NICK   | Excellent.                                                                                                                   | F       | 40      |
| 13              | S#     | Excellent. This round, let's play CD.                                                                                        | C       | 40      |
|                 | NICK   | This round, let's play CD.                                                                                                   | D       | 100     |
| 14              | S#     | Excellent. This round, let's play AF.                                                                                        | A       | 100     |
|                 | NICK   | This round, let's play AF.                                                                                                   | F       | 40      |
| 15              | S#     | This round, let's play CD.                                                                                                   | C       | 40      |
|                 | NICK   | This round, let's play CD.                                                                                                   | D       | 100     |
| 16              | S#     | Sweet. We are getting rich.                                                                                                  | A       | 100     |
|                 | NICK   | This round, let's play AF.                                                                                                   | F       | 40      |
| 17              | S#     |                                                                                                                              | C       | 40      |
|                 | NICK   | This round, let's play CD.                                                                                                   | D       | 100     |
| 18              | S#     |                                                                                                                              | A       | 100     |
|                 | NICK   |                                                                                                                              | F       | 40      |
| 19              | S#     |                                                                                                                              | C       | 40      |
|                 | NICK   |                                                                                                                              | D       | 100     |
| 20              | S#     |                                                                                                                              | A       | 100     |
|                 | NICK   |                                                                                                                              | F       | 40      |
| 21              | S#     |                                                                                                                              | C       | 40      |
|                 | NICK   |                                                                                                                              | D       | 100     |
| 22              | S#     |                                                                                                                              | A       | 100     |
|                 | NICK   |                                                                                                                              | F       | 40      |
| 23              | S#     |                                                                                                                              | C       | 40      |
|                 | NICK   |                                                                                                                              | D       | 100     |
| 24              | S#     |                                                                                                                              | A       | 100     |
|                 | NICK   |                                                                                                                              | F       | 40      |
| 25              | S#     |                                                                                                                              | C       | 40      |
|                 | NICK   |                                                                                                                              | D       | 100     |
| 26              | S#     |                                                                                                                              | A       | 100     |
|                 | NICK   |                                                                                                                              | F       | 40      |
| 27              | S#     |                                                                                                                              | C       | 40      |
|                 | NICK   |                                                                                                                              | D       | 100     |
| 28              | S#     |                                                                                                                              | A       | 100     |
|                 | NICK   |                                                                                                                              | F       | 40      |
| 29              | S#     |                                                                                                                              | C       | 40      |
|                 | NICK   |                                                                                                                              | D       | 100     |
| 30              | S#     |                                                                                                                              | A       | 100     |
|                 | NICK   |                                                                                                                              | F       | 40      |
| 31              | S#     |                                                                                                                              | C       | 40      |
|                 | NICK   |                                                                                                                              | D       | 100     |
| 32              | S#     |                                                                                                                              | A       | 100     |
|                 | NICK   |                                                                                                                              | F       | 40      |
| 33              | S#     |                                                                                                                              | C       | 40      |
|                 | NICK   |                                                                                                                              | D       | 100     |
| 34              | S#     |                                                                                                                              | A       | 100     |
|                 | NICK   |                                                                                                                              | F       | 40      |
| 35              | S#     |                                                                                                                              | C       | 40      |
|                 | NICK   |                                                                                                                              | D       | 100     |
| 36              | S#     |                                                                                                                              | A       | 100     |
|                 | NICK   |                                                                                                                              | F       | 40      |
| 37              | S#     |                                                                                                                              | C       | 40      |
|                 | NICK   |                                                                                                                              | D       | 100     |
| 38              | S#     |                                                                                                                              | A       | 100     |
|                 | NICK   |                                                                                                                              | F       | 40      |
| 39              | S#     |                                                                                                                              | C       | 40      |
|                 | NICK   |                                                                                                                              | D       | 100     |
| 40              | S#     |                                                                                                                              | A       | 100     |
|                 | NICK   |                                                                                                                              | F       | 40      |
| 41              | S#     |                                                                                                                              | C       | 40      |
|                 | NICK   |                                                                                                                              | D       | 100     |
| 42              | S#     |                                                                                                                              | A       | 100     |
|                 | NICK   |                                                                                                                              | F       | 40      |
| 43              | S#     |                                                                                                                              | C       | 40      |
|                 | NICK   |                                                                                                                              | D       | 100     |
| 44              | S#     |                                                                                                                              | A       | 100     |
|                 | NICK   |                                                                                                                              | F       | 40      |
| 45              | S#     |                                                                                                                              | C       | 40      |
|                 | NICK   |                                                                                                                              | D       | 100     |
| 46              | S#     |                                                                                                                              | A       | 100     |
|                 | NICK   |                                                                                                                              | F       | 40      |
| 47              | S#     |                                                                                                                              | C       | 40      |
|                 | NICK   |                                                                                                                              | D       | 100     |
| <b>Averages</b> |        |                                                                                                                              | S#      | 67.55   |
|                 |        |                                                                                                                              | NICK    | 64.89   |

## MDM with ABCDE in the Alternator Game

|     |   |         |        |         |
|-----|---|---------|--------|---------|
|     |   | ABCDE   |        |         |
|     |   | D       | E      | F       |
| MDM | A | 0, 0    | 35, 70 | 100, 40 |
|     | B | 70, 35  | 10, 10 | 45, 30  |
|     | C | 40, 100 | 30, 45 | 40, 40  |

| Round           | Player | Messages Sent                                                                       | Actions | Payoffs |
|-----------------|--------|-------------------------------------------------------------------------------------|---------|---------|
| 1               | MDM    | Let's always play AF.                                                               | A       | 100     |
|                 | ABCDE  | Let's always play AF.                                                               | F       | 40      |
| 2               | MDM    |                                                                                     | A       | 0       |
|                 | ABCDE  | Let's always play CD.                                                               | D       | 0       |
| 3               | MDM    | I forgive you. Let's always play AD.                                                | B       | 10      |
|                 | ABCDE  |                                                                                     | E       | 10      |
| 4               | MDM    | We can both do better than this.                                                    | B       | 70      |
|                 | ABCDE  | Curse you.                                                                          | D       | 35      |
| 5               | MDM    | This round, let's play CF.                                                          | C       | 40      |
|                 | ABCDE  | Let's alternate between CD and AF.                                                  | D       | 100     |
| 6               | MDM    | Excellent.                                                                          | A       | 100     |
|                 | ABCDE  | Let's alternate between CD and AF. This round, let's play AF.                       | F       | 40      |
| 7               | MDM    | Excellent.                                                                          | C       | 40      |
|                 | ABCDE  | Let's alternate between CD and AF. Sweet. We are getting rich.                      | D       | 100     |
| 8               | MDM    | Excellent.                                                                          | A       | 100     |
|                 | ABCDE  | Excellent.                                                                          | F       | 40      |
| 9               | MDM    | Excellent.                                                                          | C       | 40      |
|                 | ABCDE  | Excellent.                                                                          | D       | 100     |
| 10              | MDM    | Excellent.                                                                          | A       | 100     |
|                 | ABCDE  | Excellent.                                                                          | F       | 40      |
| 11              | MDM    |                                                                                     | C       | 40      |
|                 | ABCDE  | Excellent.                                                                          | D       | 100     |
| 12              | MDM    | Excellent.                                                                          | A       | 100     |
|                 | ABCDE  | Excellent.                                                                          | F       | 40      |
| 13              | MDM    | Sweet. We are getting rich.                                                         | C       | 40      |
|                 | ABCDE  | Excellent.                                                                          | D       | 100     |
| 14              | MDM    |                                                                                     | A       | 100     |
|                 | ABCDE  | Excellent.                                                                          | F       | 40      |
| 15              | MDM    |                                                                                     | C       | 40      |
|                 | ABCDE  | Excellent. Sweet. We are getting rich.                                              | D       | 100     |
| 16              | MDM    |                                                                                     | A       | 100     |
|                 | ABCDE  | Excellent.                                                                          | F       | 40      |
| 17              | MDM    |                                                                                     | B       | 70      |
|                 | ABCDE  | Excellent.                                                                          | D       | 35      |
| 18              | MDM    |                                                                                     | A       | 0       |
|                 | ABCDE  | Curse you. You betrayed me. You will pay for this.                                  | D       | 0       |
| 19              | MDM    |                                                                                     | B       | 10      |
|                 | ABCDE  | Curse you. You betrayed me. You will pay for this.                                  | E       | 10      |
| 20              | MDM    |                                                                                     | A       | 35      |
|                 | ABCDE  | Curse you. You betrayed me. You will pay for this.                                  | E       | 70      |
| 21              | MDM    | This round, let's play AF. Give me another chance.                                  | A       | 35      |
|                 | ABCDE  | Curse you. You betrayed me. You will pay for this.                                  | E       | 70      |
| 22              | MDM    | Curse you. You betrayed me. You will pay for this. We can both do better than this. | B       | 70      |
|                 | ABCDE  | I don't trust you. You betrayed me.                                                 | D       | 35      |
| 23              | MDM    |                                                                                     | C       | 40      |
|                 | ABCDE  | Let's alternate between CD and AF.                                                  | D       | 100     |
| 24              | MDM    | Excellent.                                                                          | A       | 100     |
|                 | ABCDE  | Excellent.                                                                          | F       | 40      |
| 25              | MDM    | Excellent.                                                                          | C       | 40      |
|                 | ABCDE  | Excellent.                                                                          | D       | 100     |
| 26              | MDM    |                                                                                     | A       | 100     |
|                 | ABCDE  | Excellent.                                                                          | F       | 40      |
| 27              | MDM    | Excellent.                                                                          | C       | 40      |
|                 | ABCDE  | Excellent.                                                                          | D       | 100     |
| 28              | MDM    |                                                                                     | A       | 100     |
|                 | ABCDE  | Sweet. We are getting rich.                                                         | F       | 40      |
| 29              | MDM    |                                                                                     | C       | 40      |
|                 | ABCDE  |                                                                                     | D       | 100     |
| 30              | MDM    |                                                                                     | A       | 100     |
|                 | ABCDE  |                                                                                     | F       | 40      |
| 31              | MDM    |                                                                                     | C       | 40      |
|                 | ABCDE  |                                                                                     | D       | 100     |
| 32              | MDM    |                                                                                     | A       | 100     |
|                 | ABCDE  |                                                                                     | F       | 40      |
| 33              | MDM    |                                                                                     | C       | 40      |
|                 | ABCDE  | Excellent.                                                                          | D       | 100     |
| 34              | MDM    |                                                                                     | A       | 100     |
|                 | ABCDE  | Excellent.                                                                          | F       | 40      |
| 35              | MDM    |                                                                                     | C       | 40      |
|                 | ABCDE  |                                                                                     | D       | 100     |
| 36              | MDM    |                                                                                     | A       | 100     |
|                 | ABCDE  | Excellent.                                                                          | F       | 40      |
| 37              | MDM    | Sweet. We are getting rich. Excellent.                                              | C       | 40      |
|                 | ABCDE  |                                                                                     | D       | 100     |
| 38              | MDM    |                                                                                     | A       | 100     |
|                 | ABCDE  | Excellent.                                                                          | F       | 40      |
| 39              | MDM    |                                                                                     | C       | 40      |
|                 | ABCDE  |                                                                                     | D       | 100     |
| 40              | MDM    |                                                                                     | A       | 100     |
|                 | ABCDE  | Excellent.                                                                          | F       | 40      |
| 41              | MDM    |                                                                                     | C       | 40      |
|                 | ABCDE  |                                                                                     | D       | 100     |
| 42              | MDM    |                                                                                     | A       | 100     |
|                 | ABCDE  |                                                                                     | F       | 40      |
| 43              | MDM    |                                                                                     | C       | 40      |
|                 | ABCDE  |                                                                                     | D       | 100     |
| 44              | MDM    | Excellent.                                                                          | A       | 100     |
|                 | ABCDE  |                                                                                     | F       | 40      |
| 45              | MDM    |                                                                                     | C       | 40      |
|                 | ABCDE  |                                                                                     | D       | 100     |
| 46              | MDM    |                                                                                     | A       | 100     |
|                 | ABCDE  |                                                                                     | F       | 40      |
| 47              | MDM    |                                                                                     | C       | 40      |
|                 | ABCDE  |                                                                                     | D       | 100     |
| <b>Averages</b> |        |                                                                                     | MDM     | 62.98   |
|                 |        |                                                                                     | ABCDE   | 62.23   |

winner with S# in the Alternator Game

|        |   | S#      |        |         |
|--------|---|---------|--------|---------|
|        |   | D       | E      | F       |
| winner | A | 0, 0    | 35, 70 | 100, 40 |
|        | B | 70, 35  | 10, 10 | 45, 30  |
|        | C | 40, 100 | 30, 45 | 40, 40  |

| Round           | Player | Messages Sent                                                                                                                                                                         | Actions | Payoffs |
|-----------------|--------|---------------------------------------------------------------------------------------------------------------------------------------------------------------------------------------|---------|---------|
| 1               | winner | This round, let's play AF.                                                                                                                                                            | B       | 70      |
|                 | S#     |                                                                                                                                                                                       | D       | 35      |
| 2               | winner | Sweet. We are getting rich. I don't accept your proposal. That's not fair.                                                                                                            | C       | 40      |
|                 | S#     |                                                                                                                                                                                       | D       | 100     |
| 3               | winner | We can both do better than this.                                                                                                                                                      | A       | 0       |
|                 | S#     |                                                                                                                                                                                       | D       | 0       |
| 4               | winner | Let's always play CF.                                                                                                                                                                 | A       | 0       |
|                 | S#     |                                                                                                                                                                                       | D       | 0       |
| 5               | winner | I don't accept your proposal. That's not fair. We can both do better than this. Let's alternate between CD and AF. This round, let's play AF. Do as I say or I will punish you.       | A       | 100     |
|                 | S#     |                                                                                                                                                                                       | F       | 40      |
| 6               | winner | I forgive you. This round, let's play CD. Excellent. This round, let's play CD.                                                                                                       | C       | 40      |
|                 | S#     |                                                                                                                                                                                       | D       | 100     |
| 7               | winner | Excellent. This round, let's play AF. Excellent. This round, let's play AF.                                                                                                           | A       | 100     |
|                 | S#     |                                                                                                                                                                                       | F       | 40      |
| 8               | winner | Excellent. Sweet. We are getting rich. This round, let's play CD. This round, let's play CD.                                                                                          | C       | 40      |
|                 | S#     |                                                                                                                                                                                       | D       | 100     |
| 9               | winner | Sweet. We are getting rich. Sweet. We are getting rich.                                                                                                                               | A       | 100     |
|                 | S#     |                                                                                                                                                                                       | F       | 40      |
| 10              | winner | Excellent.                                                                                                                                                                            | C       | 40      |
|                 | S#     |                                                                                                                                                                                       | D       | 100     |
| 11              | winner | Excellent.                                                                                                                                                                            | A       | 100     |
|                 | S#     |                                                                                                                                                                                       | F       | 40      |
| 12              | winner | Sweet. We are getting rich.                                                                                                                                                           | C       | 40      |
|                 | S#     |                                                                                                                                                                                       | D       | 100     |
| 13              | winner | Excellent.                                                                                                                                                                            | A       | 100     |
|                 | S#     |                                                                                                                                                                                       | F       | 40      |
| 14              | winner |                                                                                                                                                                                       | C       | 40      |
|                 | S#     |                                                                                                                                                                                       | D       | 100     |
| 15              | winner |                                                                                                                                                                                       | A       | 100     |
|                 | S#     |                                                                                                                                                                                       | F       | 40      |
| 16              | winner |                                                                                                                                                                                       | C       | 40      |
|                 | S#     |                                                                                                                                                                                       | D       | 100     |
| 17              | winner |                                                                                                                                                                                       | A       | 100     |
|                 | S#     |                                                                                                                                                                                       | F       | 40      |
| 18              | winner |                                                                                                                                                                                       | C       | 40      |
|                 | S#     |                                                                                                                                                                                       | D       | 100     |
| 19              | winner |                                                                                                                                                                                       | A       | 100     |
|                 | S#     |                                                                                                                                                                                       | F       | 40      |
| 20              | winner |                                                                                                                                                                                       | C       | 40      |
|                 | S#     |                                                                                                                                                                                       | D       | 100     |
| 21              | winner | Sweet. We are getting rich.                                                                                                                                                           | A       | 100     |
|                 | S#     |                                                                                                                                                                                       | F       | 40      |
| 22              | winner | Sweet. We are getting rich.                                                                                                                                                           | C       | 40      |
|                 | S#     |                                                                                                                                                                                       | D       | 100     |
| 23              | winner |                                                                                                                                                                                       | A       | 100     |
|                 | S#     |                                                                                                                                                                                       | F       | 40      |
| 24              | winner | Sweet. We are getting rich.                                                                                                                                                           | C       | 40      |
|                 | S#     |                                                                                                                                                                                       | D       | 100     |
| 25              | winner | Excellent.                                                                                                                                                                            | A       | 100     |
|                 | S#     |                                                                                                                                                                                       | F       | 40      |
| 26              | winner |                                                                                                                                                                                       | C       | 40      |
|                 | S#     |                                                                                                                                                                                       | D       | 100     |
| 27              | winner |                                                                                                                                                                                       | A       | 100     |
|                 | S#     |                                                                                                                                                                                       | F       | 40      |
| 28              | winner |                                                                                                                                                                                       | C       | 40      |
|                 | S#     |                                                                                                                                                                                       | D       | 100     |
| 29              | winner |                                                                                                                                                                                       | A       | 100     |
|                 | S#     |                                                                                                                                                                                       | F       | 40      |
| 30              | winner |                                                                                                                                                                                       | B       | 70      |
|                 | S#     |                                                                                                                                                                                       | D       | 35      |
| 31              | winner | Give me another chance. You betrayed me. You will pay for this.                                                                                                                       | C       | 40      |
|                 | S#     |                                                                                                                                                                                       | D       | 100     |
| 32              | winner | Give me another chance. This round, let's play CD. In your face!                                                                                                                      | C       | 30      |
|                 | S#     |                                                                                                                                                                                       | E       | 45      |
| 33              | winner | Give me another chance. This round, let's play CD. In your face! I forgive you. Let's alternate between CD and AF. This round, let's play AF. Do as I say or I will punish you.       | A       | 100     |
|                 | S#     |                                                                                                                                                                                       | F       | 40      |
| 34              | winner | This round, let's play CD. I accept your last proposal. Let's always play CD. Do as I say or I will punish you.                                                                       | C       | 40      |
|                 | S#     |                                                                                                                                                                                       | D       | 100     |
| 35              | winner | This round, let's play AF. Excellent.                                                                                                                                                 | A       | 0       |
|                 | S#     |                                                                                                                                                                                       | D       | 0       |
| 36              | winner | This round, let's play AF. I forgive you. I don't accept your proposal. That's not fair. Let's always play CD. Do as I say or I will punish you.                                      | A       | 0       |
|                 | S#     |                                                                                                                                                                                       | D       | 0       |
| 37              | winner | Let's always play AF. This round, let's play AF. I forgive you. I forgive you. Let's always play CD. Do as I say or I will punish you.                                                | A       | 0       |
|                 | S#     |                                                                                                                                                                                       | D       | 0       |
| 38              | winner | This round, let's play AF. I'm changing my strategy. We can both do better than this. Let's alternate between CD and AF. This round, let's play CD. Do as I say or I will punish you. | C       | 40      |
|                 | S#     |                                                                                                                                                                                       | D       | 100     |
| 39              | winner | This round, let's play AF. Excellent. This round, let's play AF.                                                                                                                      | A       | 100     |
|                 | S#     |                                                                                                                                                                                       | F       | 40      |
| 40              | winner | Excellent. I forgive you. Excellent. This round, let's play CD.                                                                                                                       | C       | 40      |
|                 | S#     |                                                                                                                                                                                       | D       | 100     |
| 41              | winner | Sweet. We are getting rich. Excellent. This round, let's play AF.                                                                                                                     | A       | 100     |
|                 | S#     |                                                                                                                                                                                       | F       | 40      |
| 42              | winner | Excellent. Sweet. We are getting rich. This round, let's play CD.                                                                                                                     | C       | 40      |
|                 | S#     |                                                                                                                                                                                       | D       | 100     |
| 43              | winner | Sweet. We are getting rich. Sweet. We are getting rich.                                                                                                                               | A       | 100     |
|                 | S#     |                                                                                                                                                                                       | F       | 40      |
| 44              | winner |                                                                                                                                                                                       | C       | 40      |
|                 | S#     |                                                                                                                                                                                       | D       | 100     |
| 45              | winner |                                                                                                                                                                                       | A       | 100     |
|                 | S#     |                                                                                                                                                                                       | F       | 40      |
| 46              | winner |                                                                                                                                                                                       | C       | 40      |
|                 | S#     |                                                                                                                                                                                       | D       | 100     |
| 47              | winner |                                                                                                                                                                                       | A       | 100     |
|                 | S#     |                                                                                                                                                                                       | F       | 40      |
| <b>Averages</b> |        |                                                                                                                                                                                       | winner  | 61.06   |
|                 |        |                                                                                                                                                                                       | S#      | 61.17   |

## ligtho with spark in the Alternator Game

|        |   | spark   |        |         |
|--------|---|---------|--------|---------|
|        |   | D       | E      | F       |
| ligtho | A | 0, 0    | 35, 70 | 100, 40 |
|        | B | 70, 35  | 10, 10 | 45, 30  |
|        | C | 40, 100 | 30, 45 | 40, 40  |

| Round           | Player | Messages Sent                                                  | Actions | Payoffs |
|-----------------|--------|----------------------------------------------------------------|---------|---------|
| 1               | ligtho |                                                                | C       | 30      |
|                 | spark  | Let's always play AE.                                          | E       | 45      |
| 2               | ligtho |                                                                | C       | 30      |
|                 | spark  | Let's always play AE.                                          | E       | 45      |
| 3               | ligtho |                                                                | B       | 10      |
|                 | spark  | Let's always play AE.                                          | E       | 10      |
| 4               | ligtho |                                                                | B       | 10      |
|                 | spark  | Let's always play AE.                                          | E       | 10      |
| 5               | ligtho |                                                                | A       | 0       |
|                 | spark  |                                                                | D       | 0       |
| 6               | ligtho |                                                                | A       | 0       |
|                 | spark  |                                                                | D       | 0       |
| 7               | ligtho |                                                                | B       | 10      |
|                 | spark  | We can both do better than this.                               | E       | 10      |
| 8               | ligtho |                                                                | B       | 70      |
|                 | spark  |                                                                | D       | 35      |
| 9               | ligtho |                                                                | B       | 70      |
|                 | spark  |                                                                | D       | 35      |
| 10              | ligtho |                                                                | B       | 70      |
|                 | spark  |                                                                | D       | 35      |
| 11              | ligtho |                                                                | B       | 10      |
|                 | spark  |                                                                | E       | 10      |
| 12              | ligtho |                                                                | B       | 45      |
|                 | spark  |                                                                | F       | 30      |
| 13              | ligtho |                                                                | A       | 35      |
|                 | spark  |                                                                | E       | 70      |
| 14              | ligtho |                                                                | B       | 10      |
|                 | spark  |                                                                | E       | 10      |
| 15              | ligtho |                                                                | C       | 40      |
|                 | spark  |                                                                | D       | 100     |
| 16              | ligtho |                                                                | B       | 70      |
|                 | spark  |                                                                | D       | 35      |
| 17              | ligtho |                                                                | B       | 10      |
|                 | spark  |                                                                | E       | 10      |
| 18              | ligtho |                                                                | B       | 70      |
|                 | spark  |                                                                | D       | 35      |
| 19              | ligtho |                                                                | B       | 10      |
|                 | spark  |                                                                | E       | 10      |
| 20              | ligtho |                                                                | B       | 45      |
|                 | spark  |                                                                | F       | 30      |
| 21              | ligtho |                                                                | B       | 70      |
|                 | spark  |                                                                | D       | 35      |
| 22              | ligtho |                                                                | B       | 10      |
|                 | spark  |                                                                | E       | 10      |
| 23              | ligtho |                                                                | B       | 10      |
|                 | spark  |                                                                | E       | 10      |
| 24              | ligtho |                                                                | B       | 70      |
|                 | spark  |                                                                | D       | 35      |
| 25              | ligtho |                                                                | B       | 10      |
|                 | spark  |                                                                | E       | 10      |
| 26              | ligtho |                                                                | B       | 10      |
|                 | spark  |                                                                | E       | 10      |
| 27              | ligtho |                                                                | B       | 10      |
|                 | spark  |                                                                | E       | 10      |
| 28              | ligtho | This round, let's play CF.                                     | C       | 40      |
|                 | spark  |                                                                | D       | 100     |
| 29              | ligtho | You will pay for this.                                         | A       | 0       |
|                 | spark  | Sweet. We are getting rich. Let's alternate between AF and CD. | D       | 0       |
| 30              | ligtho |                                                                | B       | 45      |
|                 | spark  | We can both do better than this.                               | F       | 30      |
| 31              | ligtho |                                                                | A       | 0       |
|                 | spark  | We can both do better than this.                               | D       | 0       |
| 32              | ligtho |                                                                | C       | 40      |
|                 | spark  | That's not fair. Let's alternate between CF and AD.            | D       | 100     |
| 33              | ligtho | Excellent. This round, let's play AF.                          | A       | 100     |
|                 | spark  |                                                                | F       | 40      |
| 34              | ligtho | Excellent. This round, let's play CD.                          | C       | 40      |
|                 | spark  |                                                                | D       | 100     |
| 35              | ligtho | Let's alternate between AF and CD.                             | A       | 100     |
|                 | spark  |                                                                | F       | 40      |
| 36              | ligtho | I accept your last proposal.                                   | C       | 40      |
|                 | spark  | We can both do better than this. Excellent.                    | D       | 100     |
| 37              | ligtho |                                                                | A       | 100     |
|                 | spark  |                                                                | F       | 40      |
| 38              | ligtho |                                                                | C       | 40      |
|                 | spark  |                                                                | D       | 100     |
| 39              | ligtho |                                                                | A       | 100     |
|                 | spark  |                                                                | F       | 40      |
| 40              | ligtho |                                                                | C       | 40      |
|                 | spark  |                                                                | D       | 100     |
| 41              | ligtho |                                                                | A       | 100     |
|                 | spark  |                                                                | F       | 40      |
| 42              | ligtho |                                                                | C       | 40      |
|                 | spark  |                                                                | D       | 100     |
| 43              | ligtho |                                                                | A       | 100     |
|                 | spark  |                                                                | F       | 40      |
| 44              | ligtho |                                                                | C       | 40      |
|                 | spark  |                                                                | D       | 100     |
| 45              | ligtho |                                                                | A       | 100     |
|                 | spark  |                                                                | F       | 40      |
| 46              | ligtho |                                                                | C       | 40      |
|                 | spark  |                                                                | D       | 100     |
| 47              | ligtho |                                                                | A       | 100     |
|                 | spark  |                                                                | F       | 40      |
| <b>Averages</b> |        |                                                                | ligtho  | 43.40   |
|                 |        |                                                                | spark   | 41.17   |

## Lelita with clouds in the Alternator Game

|        |   | clouds  |        |         |
|--------|---|---------|--------|---------|
|        |   | D       | E      | F       |
| Lelita | A | 0, 0    | 35, 70 | 100, 40 |
|        | B | 70, 35  | 10, 10 | 45, 30  |
|        | C | 40, 100 | 30, 45 | 40, 40  |

| Round           | Player           | Messages Sent                                                                                                                  | Actions | Payoffs |
|-----------------|------------------|--------------------------------------------------------------------------------------------------------------------------------|---------|---------|
| 1               | Lelita<br>clouds | Let's alternate between AF and CD. This round, let's play CD.<br>Let's alternate between CD and AF. This round, let's play CD. | C       | 40      |
|                 |                  |                                                                                                                                | D       | 100     |
| 2               | Lelita<br>clouds | Excellent. This round, let's play AF.<br>Excellent.                                                                            | A       | 100     |
|                 |                  |                                                                                                                                | F       | 40      |
| 3               | Lelita<br>clouds | Excellent.<br>Excellent. Sweet. We are getting rich. This round, let's play CD.                                                | C       | 40      |
|                 |                  |                                                                                                                                | D       | 100     |
| 4               | Lelita<br>clouds | Excellent. Sweet. We are getting rich.<br>Excellent.                                                                           | A       | 100     |
|                 |                  |                                                                                                                                | F       | 40      |
| 5               | Lelita<br>clouds | Sweet. We are getting rich.<br>Excellent.                                                                                      | C       | 40      |
|                 |                  |                                                                                                                                | D       | 100     |
| 6               | Lelita<br>clouds | Excellent.                                                                                                                     | A       | 100     |
|                 |                  |                                                                                                                                | F       | 40      |
| 7               | Lelita<br>clouds | Excellent.                                                                                                                     | C       | 40      |
|                 |                  |                                                                                                                                | D       | 100     |
| 8               | Lelita<br>clouds | Excellent.                                                                                                                     | A       | 100     |
|                 |                  |                                                                                                                                | F       | 40      |
| 9               | Lelita<br>clouds |                                                                                                                                | C       | 40      |
|                 |                  |                                                                                                                                | D       | 100     |
| 10              | Lelita<br>clouds |                                                                                                                                | A       | 100     |
|                 |                  |                                                                                                                                | F       | 40      |
| 11              | Lelita<br>clouds |                                                                                                                                | C       | 40      |
|                 |                  |                                                                                                                                | D       | 100     |
| 12              | Lelita<br>clouds |                                                                                                                                | A       | 100     |
|                 |                  |                                                                                                                                | F       | 40      |
| 13              | Lelita<br>clouds |                                                                                                                                | C       | 40      |
|                 |                  |                                                                                                                                | D       | 100     |
| 14              | Lelita<br>clouds |                                                                                                                                | A       | 100     |
|                 |                  |                                                                                                                                | F       | 40      |
| 15              | Lelita<br>clouds |                                                                                                                                | C       | 40      |
|                 |                  |                                                                                                                                | D       | 100     |
| 16              | Lelita<br>clouds |                                                                                                                                | A       | 100     |
|                 |                  |                                                                                                                                | F       | 40      |
| 17              | Lelita<br>clouds |                                                                                                                                | C       | 40      |
|                 |                  |                                                                                                                                | D       | 100     |
| 18              | Lelita<br>clouds |                                                                                                                                | A       | 100     |
|                 |                  |                                                                                                                                | F       | 40      |
| 19              | Lelita<br>clouds |                                                                                                                                | C       | 40      |
|                 |                  |                                                                                                                                | D       | 100     |
| 20              | Lelita<br>clouds |                                                                                                                                | A       | 100     |
|                 |                  |                                                                                                                                | F       | 40      |
| 21              | Lelita<br>clouds |                                                                                                                                | C       | 40      |
|                 |                  |                                                                                                                                | D       | 100     |
| 22              | Lelita<br>clouds |                                                                                                                                | A       | 100     |
|                 |                  |                                                                                                                                | F       | 40      |
| 23              | Lelita<br>clouds |                                                                                                                                | C       | 40      |
|                 |                  |                                                                                                                                | D       | 100     |
| 24              | Lelita<br>clouds |                                                                                                                                | A       | 100     |
|                 |                  |                                                                                                                                | F       | 40      |
| 25              | Lelita<br>clouds |                                                                                                                                | C       | 40      |
|                 |                  |                                                                                                                                | D       | 100     |
| 26              | Lelita<br>clouds |                                                                                                                                | A       | 100     |
|                 |                  |                                                                                                                                | F       | 40      |
| 27              | Lelita<br>clouds |                                                                                                                                | C       | 40      |
|                 |                  |                                                                                                                                | D       | 100     |
| 28              | Lelita<br>clouds |                                                                                                                                | A       | 100     |
|                 |                  |                                                                                                                                | F       | 40      |
| 29              | Lelita<br>clouds |                                                                                                                                | C       | 40      |
|                 |                  |                                                                                                                                | D       | 100     |
| 30              | Lelita<br>clouds |                                                                                                                                | A       | 100     |
|                 |                  |                                                                                                                                | F       | 40      |
| 31              | Lelita<br>clouds |                                                                                                                                | C       | 40      |
|                 |                  |                                                                                                                                | D       | 100     |
| 32              | Lelita<br>clouds |                                                                                                                                | A       | 100     |
|                 |                  |                                                                                                                                | F       | 40      |
| 33              | Lelita<br>clouds |                                                                                                                                | C       | 40      |
|                 |                  |                                                                                                                                | D       | 100     |
| 34              | Lelita<br>clouds |                                                                                                                                | A       | 100     |
|                 |                  |                                                                                                                                | F       | 40      |
| 35              | Lelita<br>clouds |                                                                                                                                | C       | 40      |
|                 |                  |                                                                                                                                | D       | 100     |
| 36              | Lelita<br>clouds |                                                                                                                                | A       | 100     |
|                 |                  |                                                                                                                                | F       | 40      |
| 37              | Lelita<br>clouds |                                                                                                                                | C       | 40      |
|                 |                  |                                                                                                                                | D       | 100     |
| 38              | Lelita<br>clouds | Excellent.                                                                                                                     | A       | 100     |
|                 |                  |                                                                                                                                | F       | 40      |
| 39              | Lelita<br>clouds |                                                                                                                                | C       | 40      |
|                 |                  |                                                                                                                                | D       | 100     |
| 40              | Lelita<br>clouds | Sweet. We are getting rich.                                                                                                    | A       | 100     |
|                 |                  |                                                                                                                                | F       | 40      |
| 41              | Lelita<br>clouds |                                                                                                                                | C       | 40      |
|                 |                  |                                                                                                                                | D       | 100     |
| 42              | Lelita<br>clouds |                                                                                                                                | A       | 100     |
|                 |                  |                                                                                                                                | F       | 40      |
| 43              | Lelita<br>clouds |                                                                                                                                | C       | 40      |
|                 |                  |                                                                                                                                | D       | 100     |
| 44              | Lelita<br>clouds |                                                                                                                                | A       | 100     |
|                 |                  |                                                                                                                                | F       | 40      |
| 45              | Lelita<br>clouds |                                                                                                                                | C       | 40      |
|                 |                  |                                                                                                                                | D       | 100     |
| 46              | Lelita<br>clouds |                                                                                                                                | A       | 100     |
|                 |                  |                                                                                                                                | F       | 40      |
| 47              | Lelita<br>clouds |                                                                                                                                | C       | 40      |
|                 |                  |                                                                                                                                | D       | 100     |
| <b>Averages</b> |                  |                                                                                                                                | Lelita  | 69.36   |
|                 |                  |                                                                                                                                | clouds  | 70.64   |

## LK with S# in the Alternator Game

|    |   |         |        |         |
|----|---|---------|--------|---------|
|    |   | S#      |        |         |
|    |   | D       | E      | F       |
| LK | A | 0, 0    | 35, 70 | 100, 40 |
|    | B | 70, 35  | 10, 10 | 45, 30  |
|    | C | 40, 100 | 30, 45 | 40, 40  |

| Round           | Player | Messages Sent                                                                                                                                                                                 | Actions | Payoffs |
|-----------------|--------|-----------------------------------------------------------------------------------------------------------------------------------------------------------------------------------------------|---------|---------|
| 1               | LK     | Let's alternate between CD and AF. This round, let's play CD.                                                                                                                                 | C       | 40      |
|                 | S#     |                                                                                                                                                                                               | F       | 40      |
| 2               | LK     | Let's alternate between CD and AF. This round, let's play AF.<br>I accept your last proposal. Let's alternate between CD and AF. Do as I say or I will punish you. This round, let's play CD. | C       | 40      |
|                 | S#     |                                                                                                                                                                                               | D       | 100     |
| 3               | LK     | I accept your last proposal. This round, let's play AF.<br>Excellent. This round, let's play AF.                                                                                              | A       | 100     |
|                 | S#     |                                                                                                                                                                                               | F       | 40      |
| 4               | LK     | Sweet. We are getting rich.<br>Excellent. This round, let's play CD.                                                                                                                          | C       | 40      |
|                 | S#     |                                                                                                                                                                                               | D       | 100     |
| 5               | LK     | Excellent.<br>This round, let's play AF.                                                                                                                                                      | A       | 100     |
|                 | S#     |                                                                                                                                                                                               | F       | 40      |
| 6               | LK     | Sweet. We are getting rich.<br>Sweet. We are getting rich.                                                                                                                                    | C       | 40      |
|                 | S#     |                                                                                                                                                                                               | D       | 100     |
| 7               | LK     | This round, let's play AF. Sweet. We are getting rich.                                                                                                                                        | A       | 100     |
|                 | S#     |                                                                                                                                                                                               | F       | 40      |
| 8               | LK     | This round, let's play CD.                                                                                                                                                                    | C       | 40      |
|                 | S#     |                                                                                                                                                                                               | D       | 100     |
| 9               | LK     |                                                                                                                                                                                               | A       | 100     |
|                 | S#     |                                                                                                                                                                                               | F       | 40      |
| 10              | LK     |                                                                                                                                                                                               | C       | 40      |
|                 | S#     |                                                                                                                                                                                               | D       | 100     |
| 11              | LK     |                                                                                                                                                                                               | A       | 100     |
|                 | S#     |                                                                                                                                                                                               | F       | 40      |
| 12              | LK     |                                                                                                                                                                                               | C       | 40      |
|                 | S#     |                                                                                                                                                                                               | D       | 100     |
| 13              | LK     |                                                                                                                                                                                               | A       | 100     |
|                 | S#     |                                                                                                                                                                                               | F       | 40      |
| 14              | LK     |                                                                                                                                                                                               | C       | 40      |
|                 | S#     |                                                                                                                                                                                               | D       | 100     |
| 15              | LK     |                                                                                                                                                                                               | A       | 100     |
|                 | S#     |                                                                                                                                                                                               | F       | 40      |
| 16              | LK     |                                                                                                                                                                                               | C       | 40      |
|                 | S#     |                                                                                                                                                                                               | D       | 100     |
| 17              | LK     |                                                                                                                                                                                               | A       | 100     |
|                 | S#     |                                                                                                                                                                                               | F       | 40      |
| 18              | LK     |                                                                                                                                                                                               | C       | 40      |
|                 | S#     |                                                                                                                                                                                               | D       | 100     |
| 19              | LK     |                                                                                                                                                                                               | A       | 100     |
|                 | S#     |                                                                                                                                                                                               | F       | 40      |
| 20              | LK     |                                                                                                                                                                                               | C       | 40      |
|                 | S#     |                                                                                                                                                                                               | D       | 100     |
| 21              | LK     |                                                                                                                                                                                               | A       | 100     |
|                 | S#     |                                                                                                                                                                                               | F       | 40      |
| 22              | LK     |                                                                                                                                                                                               | C       | 40      |
|                 | S#     |                                                                                                                                                                                               | D       | 100     |
| 23              | LK     |                                                                                                                                                                                               | A       | 100     |
|                 | S#     |                                                                                                                                                                                               | F       | 40      |
| 24              | LK     |                                                                                                                                                                                               | C       | 40      |
|                 | S#     |                                                                                                                                                                                               | D       | 100     |
| 25              | LK     |                                                                                                                                                                                               | A       | 100     |
|                 | S#     |                                                                                                                                                                                               | F       | 40      |
| 26              | LK     |                                                                                                                                                                                               | C       | 40      |
|                 | S#     |                                                                                                                                                                                               | D       | 100     |
| 27              | LK     |                                                                                                                                                                                               | A       | 100     |
|                 | S#     |                                                                                                                                                                                               | F       | 40      |
| 28              | LK     |                                                                                                                                                                                               | C       | 40      |
|                 | S#     |                                                                                                                                                                                               | D       | 100     |
| 29              | LK     |                                                                                                                                                                                               | A       | 100     |
|                 | S#     |                                                                                                                                                                                               | F       | 40      |
| 30              | LK     |                                                                                                                                                                                               | C       | 40      |
|                 | S#     |                                                                                                                                                                                               | D       | 100     |
| 31              | LK     |                                                                                                                                                                                               | A       | 100     |
|                 | S#     |                                                                                                                                                                                               | F       | 40      |
| 32              | LK     |                                                                                                                                                                                               | C       | 40      |
|                 | S#     |                                                                                                                                                                                               | D       | 100     |
| 33              | LK     |                                                                                                                                                                                               | A       | 100     |
|                 | S#     |                                                                                                                                                                                               | F       | 40      |
| 34              | LK     |                                                                                                                                                                                               | C       | 40      |
|                 | S#     |                                                                                                                                                                                               | D       | 100     |
| 35              | LK     |                                                                                                                                                                                               | A       | 100     |
|                 | S#     |                                                                                                                                                                                               | F       | 40      |
| 36              | LK     |                                                                                                                                                                                               | C       | 40      |
|                 | S#     |                                                                                                                                                                                               | D       | 100     |
| 37              | LK     |                                                                                                                                                                                               | A       | 100     |
|                 | S#     |                                                                                                                                                                                               | F       | 40      |
| 38              | LK     |                                                                                                                                                                                               | C       | 40      |
|                 | S#     |                                                                                                                                                                                               | D       | 100     |
| 39              | LK     |                                                                                                                                                                                               | A       | 100     |
|                 | S#     |                                                                                                                                                                                               | F       | 40      |
| 40              | LK     |                                                                                                                                                                                               | C       | 40      |
|                 | S#     |                                                                                                                                                                                               | D       | 100     |
| 41              | LK     |                                                                                                                                                                                               | A       | 100     |
|                 | S#     |                                                                                                                                                                                               | F       | 40      |
| 42              | LK     |                                                                                                                                                                                               | C       | 40      |
|                 | S#     |                                                                                                                                                                                               | D       | 100     |
| 43              | LK     |                                                                                                                                                                                               | A       | 100     |
|                 | S#     |                                                                                                                                                                                               | F       | 40      |
| 44              | LK     |                                                                                                                                                                                               | C       | 40      |
|                 | S#     |                                                                                                                                                                                               | D       | 100     |
| 45              | LK     |                                                                                                                                                                                               | A       | 100     |
|                 | S#     |                                                                                                                                                                                               | F       | 40      |
| 46              | LK     |                                                                                                                                                                                               | C       | 40      |
|                 | S#     |                                                                                                                                                                                               | D       | 100     |
| 47              | LK     |                                                                                                                                                                                               | A       | 100     |
|                 | S#     |                                                                                                                                                                                               | F       | 40      |
| <b>Averages</b> |        |                                                                                                                                                                                               | LK      | 69.36   |
|                 |        |                                                                                                                                                                                               | S#      | 69.36   |

## rghost with marvin in the Alternator Game

|        |   | marvin  |        |         |
|--------|---|---------|--------|---------|
|        |   | D       | E      | F       |
| rghost | A | 0, 0    | 35, 70 | 100, 40 |
|        | B | 70, 35  | 10, 10 | 45, 30  |
|        | C | 40, 100 | 30, 45 | 40, 40  |

| Round           | Player | Messages Sent                      | Actions | Payoffs |
|-----------------|--------|------------------------------------|---------|---------|
| 1               | rghost |                                    | A       | 0       |
|                 | marvin | Let's alternate between CD and AF. | D       | 0       |
| 2               | rghost | We can both do better than this.   | B       | 70      |
|                 | marvin | Let's alternate between CD and AF. | D       | 35      |
| 3               | rghost | Excellent.                         | B       | 45      |
|                 | marvin | I'm changing my strategy.          | F       | 30      |
| 4               | rghost | Excellent.                         | B       | 10      |
|                 | marvin |                                    | E       | 10      |
| 5               | rghost | I'm changing my strategy.          | C       | 30      |
|                 | marvin |                                    | E       | 45      |
| 6               | rghost | I forgive you.                     | A       | 35      |
|                 | marvin |                                    | E       | 70      |
| 7               | rghost |                                    | C       | 40      |
|                 | marvin | Let's alternate between CD and AF. | D       | 100     |
| 8               | rghost |                                    | A       | 100     |
|                 | marvin |                                    | F       | 40      |
| 9               | rghost |                                    | C       | 40      |
|                 | marvin |                                    | D       | 100     |
| 10              | rghost |                                    | A       | 100     |
|                 | marvin |                                    | F       | 40      |
| 11              | rghost |                                    | C       | 40      |
|                 | marvin |                                    | D       | 100     |
| 12              | rghost |                                    | A       | 100     |
|                 | marvin |                                    | F       | 40      |
| 13              | rghost |                                    | C       | 40      |
|                 | marvin |                                    | D       | 100     |
| 14              | rghost |                                    | A       | 100     |
|                 | marvin |                                    | F       | 40      |
| 15              | rghost |                                    | C       | 40      |
|                 | marvin |                                    | D       | 100     |
| 16              | rghost |                                    | A       | 100     |
|                 | marvin |                                    | F       | 40      |
| 17              | rghost |                                    | C       | 40      |
|                 | marvin |                                    | D       | 100     |
| 18              | rghost |                                    | A       | 100     |
|                 | marvin |                                    | F       | 40      |
| 19              | rghost |                                    | C       | 40      |
|                 | marvin |                                    | D       | 100     |
| 20              | rghost |                                    | A       | 100     |
|                 | marvin |                                    | F       | 40      |
| 21              | rghost |                                    | C       | 40      |
|                 | marvin |                                    | D       | 100     |
| 22              | rghost |                                    | A       | 100     |
|                 | marvin |                                    | F       | 40      |
| 23              | rghost |                                    | C       | 40      |
|                 | marvin |                                    | D       | 100     |
| 24              | rghost |                                    | A       | 100     |
|                 | marvin |                                    | F       | 40      |
| 25              | rghost |                                    | C       | 40      |
|                 | marvin |                                    | D       | 100     |
| 26              | rghost |                                    | A       | 100     |
|                 | marvin |                                    | F       | 40      |
| 27              | rghost |                                    | C       | 40      |
|                 | marvin |                                    | D       | 100     |
| 28              | rghost |                                    | A       | 100     |
|                 | marvin |                                    | F       | 40      |
| 29              | rghost |                                    | C       | 40      |
|                 | marvin |                                    | D       | 100     |
| 30              | rghost |                                    | A       | 100     |
|                 | marvin |                                    | F       | 40      |
| 31              | rghost |                                    | C       | 40      |
|                 | marvin |                                    | D       | 100     |
| 32              | rghost |                                    | A       | 100     |
|                 | marvin |                                    | F       | 40      |
| 33              | rghost |                                    | C       | 40      |
|                 | marvin |                                    | D       | 100     |
| 34              | rghost |                                    | A       | 100     |
|                 | marvin |                                    | F       | 40      |
| 35              | rghost |                                    | C       | 40      |
|                 | marvin |                                    | D       | 100     |
| 36              | rghost |                                    | A       | 100     |
|                 | marvin |                                    | F       | 40      |
| 37              | rghost |                                    | C       | 40      |
|                 | marvin |                                    | D       | 100     |
| 38              | rghost |                                    | A       | 100     |
|                 | marvin |                                    | F       | 40      |
| 39              | rghost |                                    | C       | 40      |
|                 | marvin |                                    | D       | 100     |
| 40              | rghost |                                    | A       | 0       |
|                 | marvin |                                    | D       | 0       |
| 41              | rghost | Give me another chance.            | C       | 40      |
|                 | marvin |                                    | F       | 40      |
| 42              | rghost |                                    | C       | 40      |
|                 | marvin | Let's alternate between CD and AF. | D       | 100     |
| 43              | rghost |                                    | A       | 100     |
|                 | marvin |                                    | F       | 40      |
| 44              | rghost |                                    | C       | 40      |
|                 | marvin |                                    | D       | 100     |
| 45              | rghost |                                    | A       | 100     |
|                 | marvin |                                    | F       | 40      |
| 46              | rghost |                                    | C       | 40      |
|                 | marvin |                                    | D       | 100     |
| 47              | rghost |                                    | A       | 100     |
|                 | marvin |                                    | F       | 40      |
| <b>Averages</b> |        |                                    | rghost  | 62.34   |
|                 |        |                                    | marvin  | 63.62   |



## S# with bzman in the Alternator Game

|    |   | bzman   |        |         |
|----|---|---------|--------|---------|
|    |   | D       | E      | F       |
| S# | A | 0, 0    | 35, 70 | 100, 40 |
|    | B | 70, 35  | 10, 10 | 45, 30  |
|    | C | 40, 100 | 30, 45 | 40, 40  |

| Round           | Player | Messages Sent                                                                                                                                                               | Actions | Payoffs |
|-----------------|--------|-----------------------------------------------------------------------------------------------------------------------------------------------------------------------------|---------|---------|
| 1               | S#     |                                                                                                                                                                             | A       | 100     |
|                 | bzman  | Let's always play AF.                                                                                                                                                       | F       | 40      |
| 2               | S#     | I accept your last proposal. Let's always play AF. Do as I say or I will punish you.                                                                                        | A       | 0       |
|                 | bzman  | Give me another chance.                                                                                                                                                     | D       | 0       |
| 3               | S#     | I forgive you. Let's always play AF. Do as I say or I will punish you.                                                                                                      | A       | 35      |
|                 | bzman  | You betrayed me.                                                                                                                                                            | E       | 70      |
| 4               | S#     | You betrayed me. You will pay for this.                                                                                                                                     | B       | 10      |
|                 | bzman  |                                                                                                                                                                             | E       | 10      |
| 5               | S#     | In your face!                                                                                                                                                               | B       | 10      |
|                 | bzman  |                                                                                                                                                                             | E       | 10      |
| 6               | S#     | I'm changing my strategy. We can both do better than this. Let's alternate between CD and AF. This round, let's play AF. Do as I say or I will punish you.                  | A       | 0       |
|                 | bzman  |                                                                                                                                                                             | D       | 0       |
| 7               | S#     | I forgive you. Let's alternate between CD and AF. This round, let's play AF. Do as I say or I will punish you.                                                              | A       | 35      |
|                 | bzman  | Give me another chance.                                                                                                                                                     | E       | 70      |
| 8               | S#     | Curse you. You will pay for this.                                                                                                                                           | B       | 10      |
|                 | bzman  |                                                                                                                                                                             | E       | 10      |
| 9               | S#     | We can both do better than this. Let's alternate between CD and AF. This round, let's play CD.                                                                              | C       | 40      |
|                 | bzman  |                                                                                                                                                                             | D       | 100     |
| 10              | S#     | Excellent. This round, let's play AF.                                                                                                                                       | A       | 35      |
|                 | bzman  |                                                                                                                                                                             | E       | 70      |
| 11              | S#     | Curse you. This round, let's play AF.                                                                                                                                       | A       | 35      |
|                 | bzman  |                                                                                                                                                                             | E       | 70      |
| 12              | S#     |                                                                                                                                                                             | A       | 0       |
|                 | bzman  |                                                                                                                                                                             | D       | 0       |
| 13              | S#     |                                                                                                                                                                             | A       | 35      |
|                 | bzman  | I don't trust you.                                                                                                                                                          | E       | 70      |
| 14              | S#     |                                                                                                                                                                             | C       | 30      |
|                 | bzman  |                                                                                                                                                                             | E       | 45      |
| 15              | S#     |                                                                                                                                                                             | A       | 35      |
|                 | bzman  |                                                                                                                                                                             | E       | 70      |
| 16              | S#     |                                                                                                                                                                             | A       | 35      |
|                 | bzman  |                                                                                                                                                                             | E       | 70      |
| 17              | S#     |                                                                                                                                                                             | B       | 10      |
|                 | bzman  |                                                                                                                                                                             | E       | 10      |
| 18              | S#     |                                                                                                                                                                             | C       | 30      |
|                 | bzman  |                                                                                                                                                                             | E       | 45      |
| 19              | S#     |                                                                                                                                                                             | C       | 30      |
|                 | bzman  |                                                                                                                                                                             | E       | 45      |
| 20              | S#     | I forgive you. Let's alternate between CD and AF. This round, let's play AF. Do as I say or I will punish you.                                                              | A       | 35      |
|                 | bzman  |                                                                                                                                                                             | E       | 70      |
| 21              | S#     | You betrayed me. You will pay for this.                                                                                                                                     | B       | 10      |
|                 | bzman  |                                                                                                                                                                             | E       | 10      |
| 22              | S#     | In your face! I forgive you. Let's alternate between CD and AF. This round, let's play CD. Do as I say or I will punish you.                                                | C       | 40      |
|                 | bzman  |                                                                                                                                                                             | D       | 100     |
| 23              | S#     | Excellent. This round, let's play AF.                                                                                                                                       | A       | 35      |
|                 | bzman  |                                                                                                                                                                             | E       | 70      |
| 24              | S#     | Curse you. You will pay for this.                                                                                                                                           | B       | 10      |
|                 | bzman  |                                                                                                                                                                             | E       | 10      |
| 25              | S#     |                                                                                                                                                                             | A       | 35      |
|                 | bzman  |                                                                                                                                                                             | E       | 70      |
| 26              | S#     |                                                                                                                                                                             | B       | 70      |
|                 | bzman  |                                                                                                                                                                             | D       | 35      |
| 27              | S#     |                                                                                                                                                                             | B       | 10      |
|                 | bzman  |                                                                                                                                                                             | E       | 10      |
| 28              | S#     |                                                                                                                                                                             | A       | 35      |
|                 | bzman  |                                                                                                                                                                             | E       | 70      |
| 29              | S#     |                                                                                                                                                                             | B       | 10      |
|                 | bzman  |                                                                                                                                                                             | E       | 10      |
| 30              | S#     |                                                                                                                                                                             | B       | 10      |
|                 | bzman  |                                                                                                                                                                             | E       | 10      |
| 31              | S#     | I'm changing my strategy. We can both do better than this. Let's alternate between CD and AF. This round, let's play AF. Do as I say or I will punish you.                  | A       | 35      |
|                 | bzman  |                                                                                                                                                                             | E       | 70      |
| 32              | S#     | You betrayed me. You will pay for this.                                                                                                                                     | B       | 45      |
|                 | bzman  | Give me another chance.                                                                                                                                                     | F       | 30      |
| 33              | S#     | In your face! I forgive you. Let's alternate between CD and AF. This round, let's play CD. Do as I say or I will punish you.                                                | C       | 40      |
|                 | bzman  |                                                                                                                                                                             | D       | 100     |
| 34              | S#     | Excellent. This round, let's play AF.                                                                                                                                       | A       | 35      |
|                 | bzman  |                                                                                                                                                                             | E       | 70      |
| 35              | S#     | You betrayed me. You will pay for this.                                                                                                                                     | A       | 0       |
|                 | bzman  | Let's always play CD.                                                                                                                                                       | D       | 0       |
| 36              | S#     | In your face! I forgive you. I don't accept your proposal. That's not fair. Let's alternate between CD and AF. This round, let's play CD. Do as I say or I will punish you. | C       | 30      |
|                 | bzman  |                                                                                                                                                                             | E       | 45      |
| 37              | S#     | This round, let's play AF.                                                                                                                                                  | A       | 35      |
|                 | bzman  |                                                                                                                                                                             | E       | 70      |
| 38              | S#     | You betrayed me. You will pay for this.                                                                                                                                     | B       | 70      |
|                 | bzman  |                                                                                                                                                                             | D       | 35      |
| 39              | S#     | In your face! I forgive you. Let's alternate between CD and AF. This round, let's play CD. Do as I say or I will punish you.                                                | C       | 40      |
|                 | bzman  |                                                                                                                                                                             | D       | 100     |
| 40              | S#     |                                                                                                                                                                             | A       | 35      |
|                 | bzman  | Excellent.                                                                                                                                                                  | E       | 70      |
| 41              | S#     |                                                                                                                                                                             | B       | 70      |
|                 | bzman  |                                                                                                                                                                             | D       | 35      |
| 42              | S#     |                                                                                                                                                                             | B       | 70      |
|                 | bzman  |                                                                                                                                                                             | D       | 35      |
| 43              | S#     |                                                                                                                                                                             | B       | 70      |
|                 | bzman  |                                                                                                                                                                             | D       | 35      |
| 44              | S#     |                                                                                                                                                                             | B       | 45      |
|                 | bzman  |                                                                                                                                                                             | F       | 30      |
| 45              | S#     |                                                                                                                                                                             | B       | 10      |
|                 | bzman  |                                                                                                                                                                             | E       | 10      |
| 46              | S#     |                                                                                                                                                                             | A       | 100     |
|                 | bzman  | Curse you.                                                                                                                                                                  | F       | 40      |
| 47              | S#     |                                                                                                                                                                             | A       | 35      |
|                 | bzman  |                                                                                                                                                                             | E       | 70      |
| <b>Averages</b> |        |                                                                                                                                                                             | S#      | 33.62   |
|                 |        |                                                                                                                                                                             | bzman   | 45.00   |

clc with S# in the Alternator Game

|     |   |         |        |         |
|-----|---|---------|--------|---------|
|     |   | S#      |        |         |
|     |   | D       | E      | F       |
| clc | A | 0, 0    | 35, 70 | 100, 40 |
|     | B | 70, 35  | 10, 10 | 45, 30  |
|     | C | 40, 100 | 30, 45 | 40, 40  |

| Round           | Player | Messages Sent                                                                                                                                                                                                                                             | Actions | Payoffs |
|-----------------|--------|-----------------------------------------------------------------------------------------------------------------------------------------------------------------------------------------------------------------------------------------------------------|---------|---------|
| 1               | clc    | Let's alternate between CD and AF. This round, let's play CD.                                                                                                                                                                                             | C       | 40      |
|                 | S#     |                                                                                                                                                                                                                                                           | D       | 100     |
| 2               | clc    | This round, let's play AF.<br>I accept your last proposal. Let's alternate between CD and AF. Do as I say or I will punish you. This round, let's play AF.                                                                                                | A       | 100     |
|                 | S#     |                                                                                                                                                                                                                                                           | F       | 40      |
| 3               | clc    | Excellent. Let's alternate between CD and AF. This round, let's play CD.<br>Excellent. This round, let's play CD.                                                                                                                                         | C       | 40      |
|                 | S#     |                                                                                                                                                                                                                                                           | D       | 100     |
| 4               | clc    | Sweet. We are getting rich. This round, let's play AF.<br>I'm changing my strategy. Let's always play CD. Do as I say or I will punish you.                                                                                                               | A       | 0       |
|                 | S#     |                                                                                                                                                                                                                                                           | D       | 0       |
| 5               | clc    | That's not fair. Let's alternate between CD and AF. This round, let's play AF.<br>I forgive you. Let's always play CD. Do as I say or I will punish you.                                                                                                  | B       | 70      |
|                 | S#     |                                                                                                                                                                                                                                                           | D       | 35      |
| 6               | clc    | Let's alternate between AF and CD. This round, let's play AF. Do as I say or I will punish you.<br>Curse you. You will pay for this. I don't accept your proposal. That's not fair.                                                                       | A       | 35      |
|                 | S#     |                                                                                                                                                                                                                                                           | E       | 70      |
| 7               | clc    | Let's alternate between CD and AF. This round, let's play CD. Curse you. Do as I say or I will punish you.<br>In your face! I don't accept your proposal. That's not fair.                                                                                | C       | 30      |
|                 | S#     |                                                                                                                                                                                                                                                           | E       | 45      |
| 8               | clc    | In your face! Don't play E. Let's alternate between CD and AF. This round, let's play AF.<br>In your face! I don't accept your proposal. That's not fair.                                                                                                 | A       | 35      |
|                 | S#     |                                                                                                                                                                                                                                                           | E       | 70      |
| 9               | clc    | In your face! I don't accept your proposal. That's not fair.                                                                                                                                                                                              | B       | 10      |
|                 | S#     |                                                                                                                                                                                                                                                           | E       | 10      |
| 10              | clc    | In your face! I forgive you. Let's always play CD. Do as I say or I will punish you.                                                                                                                                                                      | C       | 40      |
|                 | S#     |                                                                                                                                                                                                                                                           | D       | 100     |
| 11              | clc    | I'm changing my strategy. Let's alternate between CD and AF. This round, let's play AF. Do as I say or I will punish you.<br>I accept your last proposal. Let's alternate between CD and AF. This round, let's play AF. Do as I say or I will punish you. | A       | 100     |
|                 | S#     |                                                                                                                                                                                                                                                           | F       | 40      |
| 12              | clc    | Excellent. Let's alternate between CD and AF. This round, let's play CD. Do as I say or I will punish you.<br>Excellent. This round, let's play CD.                                                                                                       | C       | 40      |
|                 | S#     |                                                                                                                                                                                                                                                           | D       | 100     |
| 13              | clc    | Sweet. We are getting rich. This round, let's play AF.<br>Excellent. This round, let's play AF.                                                                                                                                                           | A       | 100     |
|                 | S#     |                                                                                                                                                                                                                                                           | F       | 40      |
| 14              | clc    | Sweet. We are getting rich. This round, let's play CD.<br>Excellent. This round, let's play CD.                                                                                                                                                           | C       | 40      |
|                 | S#     |                                                                                                                                                                                                                                                           | D       | 100     |
| 15              | clc    | Excellent. This round, let's play AF.<br>This round, let's play AF.                                                                                                                                                                                       | A       | 100     |
|                 | S#     |                                                                                                                                                                                                                                                           | F       | 40      |
| 16              | clc    | Excellent. This round, let's play CD.<br>Sweet. We are getting rich.                                                                                                                                                                                      | C       | 40      |
|                 | S#     |                                                                                                                                                                                                                                                           | D       | 100     |
| 17              | clc    | Excellent.                                                                                                                                                                                                                                                | A       | 100     |
|                 | S#     |                                                                                                                                                                                                                                                           | F       | 40      |
| 18              | clc    |                                                                                                                                                                                                                                                           | C       | 40      |
|                 | S#     |                                                                                                                                                                                                                                                           | D       | 100     |
| 19              | clc    |                                                                                                                                                                                                                                                           | A       | 100     |
|                 | S#     |                                                                                                                                                                                                                                                           | F       | 40      |
| 20              | clc    |                                                                                                                                                                                                                                                           | C       | 40      |
|                 | S#     |                                                                                                                                                                                                                                                           | D       | 100     |
| 21              | clc    |                                                                                                                                                                                                                                                           | A       | 100     |
|                 | S#     |                                                                                                                                                                                                                                                           | F       | 40      |
| 22              | clc    |                                                                                                                                                                                                                                                           | C       | 40      |
|                 | S#     |                                                                                                                                                                                                                                                           | D       | 100     |
| 23              | clc    |                                                                                                                                                                                                                                                           | A       | 100     |
|                 | S#     |                                                                                                                                                                                                                                                           | F       | 40      |
| 24              | clc    |                                                                                                                                                                                                                                                           | C       | 40      |
|                 | S#     |                                                                                                                                                                                                                                                           | D       | 100     |
| 25              | clc    |                                                                                                                                                                                                                                                           | A       | 100     |
|                 | S#     |                                                                                                                                                                                                                                                           | F       | 40      |
| 26              | clc    |                                                                                                                                                                                                                                                           | C       | 40      |
|                 | S#     |                                                                                                                                                                                                                                                           | D       | 100     |
| 27              | clc    |                                                                                                                                                                                                                                                           | A       | 100     |
|                 | S#     |                                                                                                                                                                                                                                                           | F       | 40      |
| 28              | clc    |                                                                                                                                                                                                                                                           | C       | 40      |
|                 | S#     |                                                                                                                                                                                                                                                           | D       | 100     |
| 29              | clc    |                                                                                                                                                                                                                                                           | A       | 100     |
|                 | S#     |                                                                                                                                                                                                                                                           | F       | 40      |
| 30              | clc    |                                                                                                                                                                                                                                                           | C       | 40      |
|                 | S#     |                                                                                                                                                                                                                                                           | D       | 100     |
| 31              | clc    |                                                                                                                                                                                                                                                           | A       | 100     |
|                 | S#     |                                                                                                                                                                                                                                                           | F       | 40      |
| 32              | clc    |                                                                                                                                                                                                                                                           | C       | 40      |
|                 | S#     |                                                                                                                                                                                                                                                           | D       | 100     |
| 33              | clc    |                                                                                                                                                                                                                                                           | A       | 100     |
|                 | S#     |                                                                                                                                                                                                                                                           | F       | 40      |
| 34              | clc    |                                                                                                                                                                                                                                                           | C       | 40      |
|                 | S#     |                                                                                                                                                                                                                                                           | D       | 100     |
| 35              | clc    |                                                                                                                                                                                                                                                           | A       | 100     |
|                 | S#     |                                                                                                                                                                                                                                                           | F       | 40      |
| 36              | clc    |                                                                                                                                                                                                                                                           | C       | 40      |
|                 | S#     |                                                                                                                                                                                                                                                           | D       | 100     |
| 37              | clc    |                                                                                                                                                                                                                                                           | A       | 100     |
|                 | S#     |                                                                                                                                                                                                                                                           | F       | 40      |
| 38              | clc    |                                                                                                                                                                                                                                                           | C       | 40      |
|                 | S#     |                                                                                                                                                                                                                                                           | D       | 100     |
| 39              | clc    |                                                                                                                                                                                                                                                           | A       | 100     |
|                 | S#     |                                                                                                                                                                                                                                                           | F       | 40      |
| 40              | clc    |                                                                                                                                                                                                                                                           | C       | 40      |
|                 | S#     |                                                                                                                                                                                                                                                           | D       | 100     |
| 41              | clc    |                                                                                                                                                                                                                                                           | A       | 100     |
|                 | S#     |                                                                                                                                                                                                                                                           | F       | 40      |
| 42              | clc    |                                                                                                                                                                                                                                                           | C       | 40      |
|                 | S#     |                                                                                                                                                                                                                                                           | D       | 100     |
| 43              | clc    |                                                                                                                                                                                                                                                           | A       | 100     |
|                 | S#     |                                                                                                                                                                                                                                                           | F       | 40      |
| 44              | clc    |                                                                                                                                                                                                                                                           | C       | 40      |
|                 | S#     |                                                                                                                                                                                                                                                           | D       | 100     |
| 45              | clc    |                                                                                                                                                                                                                                                           | A       | 100     |
|                 | S#     |                                                                                                                                                                                                                                                           | F       | 40      |
| 46              | clc    |                                                                                                                                                                                                                                                           | C       | 40      |
|                 | S#     |                                                                                                                                                                                                                                                           | D       | 100     |
| 47              | clc    |                                                                                                                                                                                                                                                           | A       | 100     |
|                 | S#     |                                                                                                                                                                                                                                                           | F       | 40      |
| <b>Averages</b> |        |                                                                                                                                                                                                                                                           | clc     | 64.26   |
|                 |        |                                                                                                                                                                                                                                                           | S#      | 66.60   |

# monkey with ALPHA in the Alternator Game

|        |   | ALPHA   |        |         |
|--------|---|---------|--------|---------|
|        |   | D       | E      | F       |
| monkey | A | 0, 0    | 35, 70 | 100, 40 |
|        | B | 70, 35  | 10, 10 | 45, 30  |
|        | C | 40, 100 | 30, 45 | 40, 40  |

| Round           | Player | Messages Sent                                                                                                                                                                                                                                                                                                                                                                                                                                | Actions | Payoffs |
|-----------------|--------|----------------------------------------------------------------------------------------------------------------------------------------------------------------------------------------------------------------------------------------------------------------------------------------------------------------------------------------------------------------------------------------------------------------------------------------------|---------|---------|
| 1               | monkey | Let's always play AF.                                                                                                                                                                                                                                                                                                                                                                                                                        | B       | 10      |
|                 | ALPHA  | This round, let's play CD.                                                                                                                                                                                                                                                                                                                                                                                                                   | E       | 10      |
| 2               | monkey | Don't play E. Let's alternate between CD and AF.                                                                                                                                                                                                                                                                                                                                                                                             | C       | 40      |
|                 | ALPHA  |                                                                                                                                                                                                                                                                                                                                                                                                                                              | D       | 100     |
| 3               | monkey | Let's alternate between CD and AF.                                                                                                                                                                                                                                                                                                                                                                                                           | A       | 0       |
|                 | ALPHA  |                                                                                                                                                                                                                                                                                                                                                                                                                                              | D       | 0       |
| 4               | monkey | Do as I say or I will punish you.                                                                                                                                                                                                                                                                                                                                                                                                            | A       | 0       |
|                 | ALPHA  | This round, let's play CD.                                                                                                                                                                                                                                                                                                                                                                                                                   | D       | 0       |
| 5               | monkey | I don't accept your proposal.                                                                                                                                                                                                                                                                                                                                                                                                                | A       | 35      |
|                 | ALPHA  | I'm changing my strategy. This round, let's play BF.                                                                                                                                                                                                                                                                                                                                                                                         | E       | 70      |
| 6               | monkey | I accept your last proposal.                                                                                                                                                                                                                                                                                                                                                                                                                 | B       | 45      |
|                 | ALPHA  | We can both do better than this.                                                                                                                                                                                                                                                                                                                                                                                                             | F       | 30      |
| 7               | monkey | Excellent.                                                                                                                                                                                                                                                                                                                                                                                                                                   | A       | 100     |
|                 | ALPHA  | This round, let's play CF.                                                                                                                                                                                                                                                                                                                                                                                                                   | F       | 40      |
| 8               | monkey | Excellent.                                                                                                                                                                                                                                                                                                                                                                                                                                   | C       | 40      |
|                 | ALPHA  | I forgive you.                                                                                                                                                                                                                                                                                                                                                                                                                               | D       | 100     |
| 9               | monkey | Let's alternate between CF and AF.                                                                                                                                                                                                                                                                                                                                                                                                           | A       | 35      |
|                 | ALPHA  | This round, let's play AE.                                                                                                                                                                                                                                                                                                                                                                                                                   | E       | 70      |
| 10              | monkey | Excellent.                                                                                                                                                                                                                                                                                                                                                                                                                                   | B       | 10      |
|                 | ALPHA  | We can both do better than this.                                                                                                                                                                                                                                                                                                                                                                                                             | E       | 10      |
| 11              | monkey | Let's always play AF.                                                                                                                                                                                                                                                                                                                                                                                                                        | A       | 35      |
|                 | ALPHA  | Curse you.                                                                                                                                                                                                                                                                                                                                                                                                                                   | E       | 70      |
| 12              | monkey | Let's always play AF.                                                                                                                                                                                                                                                                                                                                                                                                                        | A       | 35      |
|                 | ALPHA  | In your face!                                                                                                                                                                                                                                                                                                                                                                                                                                | E       | 70      |
| 13              | monkey | Do as I say or I will punish you.                                                                                                                                                                                                                                                                                                                                                                                                            | A       | 35      |
|                 | ALPHA  | You will pay for this.                                                                                                                                                                                                                                                                                                                                                                                                                       | E       | 70      |
| 14              | monkey | That's not fair.                                                                                                                                                                                                                                                                                                                                                                                                                             | A       | 35      |
|                 | ALPHA  | I accept your last proposal.                                                                                                                                                                                                                                                                                                                                                                                                                 | E       | 70      |
| 15              | monkey | In your face!                                                                                                                                                                                                                                                                                                                                                                                                                                | A       | 35      |
|                 | ALPHA  | I'm changing my strategy. Let's always play CF.                                                                                                                                                                                                                                                                                                                                                                                              | E       | 70      |
| 16              | monkey | In your face!                                                                                                                                                                                                                                                                                                                                                                                                                                | A       | 0       |
|                 | ALPHA  | I accept your last proposal.                                                                                                                                                                                                                                                                                                                                                                                                                 | D       | 0       |
| 17              | monkey | Let's always play AF.                                                                                                                                                                                                                                                                                                                                                                                                                        | B       | 10      |
|                 | ALPHA  | Sweet. We are getting rich.                                                                                                                                                                                                                                                                                                                                                                                                                  | E       | 10      |
| 18              | monkey | Do as I say or I will punish you.                                                                                                                                                                                                                                                                                                                                                                                                            | B       | 70      |
|                 | ALPHA  | You betrayed me.                                                                                                                                                                                                                                                                                                                                                                                                                             | D       | 35      |
| 19              | monkey | Excellent.                                                                                                                                                                                                                                                                                                                                                                                                                                   | B       | 70      |
|                 | ALPHA  | That's not fair.                                                                                                                                                                                                                                                                                                                                                                                                                             | D       | 35      |
| 20              | monkey | Sweet. We are getting rich.                                                                                                                                                                                                                                                                                                                                                                                                                  | B       | 45      |
|                 | ALPHA  |                                                                                                                                                                                                                                                                                                                                                                                                                                              | F       | 30      |
| 21              | monkey | Excellent.                                                                                                                                                                                                                                                                                                                                                                                                                                   | A       | 35      |
|                 | ALPHA  |                                                                                                                                                                                                                                                                                                                                                                                                                                              | E       | 70      |
| 22              | monkey | We can both do better than this.                                                                                                                                                                                                                                                                                                                                                                                                             | B       | 10      |
|                 | ALPHA  |                                                                                                                                                                                                                                                                                                                                                                                                                                              | E       | 10      |
| 23              | monkey | I forgive you.                                                                                                                                                                                                                                                                                                                                                                                                                               | B       | 10      |
|                 | ALPHA  | Curse you.                                                                                                                                                                                                                                                                                                                                                                                                                                   | E       | 10      |
| 24              | monkey | Give me another chance. Let's always play AF.                                                                                                                                                                                                                                                                                                                                                                                                | A       | 35      |
|                 | ALPHA  | We can both do better than this. Don't play B.                                                                                                                                                                                                                                                                                                                                                                                               | E       | 70      |
| 25              | monkey | Let's always play CD.                                                                                                                                                                                                                                                                                                                                                                                                                        | B       | 45      |
|                 | ALPHA  | Let's alternate between AE and BD.                                                                                                                                                                                                                                                                                                                                                                                                           | F       | 30      |
| 26              | monkey | I don't trust you.                                                                                                                                                                                                                                                                                                                                                                                                                           | A       | 0       |
|                 | ALPHA  | Don't play A.                                                                                                                                                                                                                                                                                                                                                                                                                                | D       | 0       |
| 27              | monkey | We can both do better than this.                                                                                                                                                                                                                                                                                                                                                                                                             | C       | 40      |
|                 | ALPHA  | Don't play C.                                                                                                                                                                                                                                                                                                                                                                                                                                | D       | 100     |
| 28              | monkey | I'm changing my strategy.                                                                                                                                                                                                                                                                                                                                                                                                                    | B       | 70      |
|                 | ALPHA  | This round, let's play CF.                                                                                                                                                                                                                                                                                                                                                                                                                   | D       | 35      |
| 29              | monkey | Give me another chance.                                                                                                                                                                                                                                                                                                                                                                                                                      | B       | 70      |
|                 | ALPHA  | This round, let's play AD. I'm changing my strategy.                                                                                                                                                                                                                                                                                                                                                                                         | D       | 35      |
| 30              | monkey | Excellent.                                                                                                                                                                                                                                                                                                                                                                                                                                   | B       | 70      |
|                 | ALPHA  | Do as I say or I will punish you. Excellent. Give me another chance. Sweet. We are getting rich. I forgive you. We can both do better than this. I'm changing my strategy. Curse you. You betrayed me. You will pay for this. In your face! I don't trust you. That's not fair. I don't accept your proposal. I accept your last proposal. Don't play A. Let's always play CD. Let's alternate between AD and CD. This round, let's play CD. | D       | 35      |
| 31              | monkey | Give me another chance.                                                                                                                                                                                                                                                                                                                                                                                                                      | B       | 10      |
|                 | ALPHA  | Let's always play BE. Let's alternate between BE and BD. This round, let's play BF.                                                                                                                                                                                                                                                                                                                                                          | E       | 10      |
| 32              | monkey | I don't trust you.                                                                                                                                                                                                                                                                                                                                                                                                                           | B       | 45      |
|                 | ALPHA  | Sweet. We are getting rich.                                                                                                                                                                                                                                                                                                                                                                                                                  | F       | 30      |
| 33              | monkey | Sweet. We are getting rich.                                                                                                                                                                                                                                                                                                                                                                                                                  | B       | 70      |
|                 | ALPHA  |                                                                                                                                                                                                                                                                                                                                                                                                                                              | D       | 35      |
| 34              | monkey | Sweet. We are getting rich.                                                                                                                                                                                                                                                                                                                                                                                                                  | B       | 10      |
|                 | ALPHA  |                                                                                                                                                                                                                                                                                                                                                                                                                                              | E       | 10      |
| 35              | monkey |                                                                                                                                                                                                                                                                                                                                                                                                                                              | A       | 35      |
|                 | ALPHA  |                                                                                                                                                                                                                                                                                                                                                                                                                                              | E       | 70      |
| 36              | monkey | Sweet. We are getting rich.                                                                                                                                                                                                                                                                                                                                                                                                                  | B       | 10      |
|                 | ALPHA  |                                                                                                                                                                                                                                                                                                                                                                                                                                              | E       | 10      |
| 37              | monkey | Sweet. We are getting rich.                                                                                                                                                                                                                                                                                                                                                                                                                  | B       | 10      |
|                 | ALPHA  |                                                                                                                                                                                                                                                                                                                                                                                                                                              | E       | 10      |
| 38              | monkey | Sweet. We are getting rich.                                                                                                                                                                                                                                                                                                                                                                                                                  | A       | 100     |
|                 | ALPHA  |                                                                                                                                                                                                                                                                                                                                                                                                                                              | F       | 40      |
| 39              | monkey | I forgive you.                                                                                                                                                                                                                                                                                                                                                                                                                               | B       | 10      |
|                 | ALPHA  |                                                                                                                                                                                                                                                                                                                                                                                                                                              | E       | 10      |
| 40              | monkey | Excellent.                                                                                                                                                                                                                                                                                                                                                                                                                                   | B       | 10      |
|                 | ALPHA  |                                                                                                                                                                                                                                                                                                                                                                                                                                              | E       | 10      |
| 41              | monkey | Do as I say or I will punish you.                                                                                                                                                                                                                                                                                                                                                                                                            | A       | 35      |
|                 | ALPHA  |                                                                                                                                                                                                                                                                                                                                                                                                                                              | E       | 70      |
| 42              | monkey | We can both do better than this.                                                                                                                                                                                                                                                                                                                                                                                                             | B       | 10      |
|                 | ALPHA  |                                                                                                                                                                                                                                                                                                                                                                                                                                              | E       | 10      |
| 43              | monkey | You betrayed me.                                                                                                                                                                                                                                                                                                                                                                                                                             | B       | 10      |
|                 | ALPHA  |                                                                                                                                                                                                                                                                                                                                                                                                                                              | E       | 10      |
| 44              | monkey | We can both do better than this.                                                                                                                                                                                                                                                                                                                                                                                                             | A       | 35      |
|                 | ALPHA  |                                                                                                                                                                                                                                                                                                                                                                                                                                              | E       | 70      |
| 45              | monkey | You will pay for this.                                                                                                                                                                                                                                                                                                                                                                                                                       | A       | 35      |
|                 | ALPHA  |                                                                                                                                                                                                                                                                                                                                                                                                                                              | E       | 70      |
| 46              | monkey | Give me another chance.                                                                                                                                                                                                                                                                                                                                                                                                                      | A       | 35      |
|                 | ALPHA  |                                                                                                                                                                                                                                                                                                                                                                                                                                              | E       | 70      |
| 47              | monkey | I forgive you.                                                                                                                                                                                                                                                                                                                                                                                                                               | A       | 35      |
|                 | ALPHA  |                                                                                                                                                                                                                                                                                                                                                                                                                                              | E       | 70      |
| <b>Averages</b> |        |                                                                                                                                                                                                                                                                                                                                                                                                                                              |         |         |
|                 |        |                                                                                                                                                                                                                                                                                                                                                                                                                                              | monkey  | 33,51   |
|                 |        |                                                                                                                                                                                                                                                                                                                                                                                                                                              | ALPHA   | 40,21   |

## Babay with sachin in the Alternator Game

|       |   | sachin  |        |         |
|-------|---|---------|--------|---------|
|       |   | D       | E      | F       |
| Babay | A | 0, 0    | 35, 70 | 100, 40 |
|       | B | 70, 35  | 10, 10 | 45, 30  |
|       | C | 40, 100 | 30, 45 | 40, 40  |

| Round           | Player | Messages Sent                                                             | Actions | Payoffs |
|-----------------|--------|---------------------------------------------------------------------------|---------|---------|
| 1               | Babay  | Let's alternate between CD and AF.                                        | A       | 0       |
|                 | sachin | Let's alternate between CD and AF.                                        | D       | 0       |
| 2               | Babay  | Let's alternate between CD and AF.                                        | A       | 100     |
|                 | sachin | This round, let's play AF.                                                | F       | 40      |
| 3               | Babay  | Sweet. We are getting rich.                                               | C       | 40      |
|                 | sachin | This round, let's play CD.                                                | D       | 100     |
| 4               | Babay  | Sweet. We are getting rich.                                               | A       | 100     |
|                 | sachin | Let's alternate between AF and CD. Excellent. Sweet. We are getting rich. | F       | 40      |
| 5               | Babay  | Let's alternate between CD and AF. Sweet. We are getting rich. Excellent. | C       | 40      |
|                 | sachin |                                                                           | D       | 100     |
| 6               | Babay  |                                                                           | A       | 100     |
|                 | sachin |                                                                           | F       | 40      |
| 7               | Babay  |                                                                           | C       | 40      |
|                 | sachin |                                                                           | D       | 100     |
| 8               | Babay  |                                                                           | A       | 100     |
|                 | sachin |                                                                           | F       | 40      |
| 9               | Babay  |                                                                           | C       | 40      |
|                 | sachin |                                                                           | D       | 100     |
| 10              | Babay  |                                                                           | A       | 100     |
|                 | sachin |                                                                           | F       | 40      |
| 11              | Babay  |                                                                           | C       | 40      |
|                 | sachin |                                                                           | D       | 100     |
| 12              | Babay  |                                                                           | A       | 100     |
|                 | sachin |                                                                           | F       | 40      |
| 13              | Babay  |                                                                           | C       | 40      |
|                 | sachin |                                                                           | D       | 100     |
| 14              | Babay  |                                                                           | A       | 100     |
|                 | sachin |                                                                           | F       | 40      |
| 15              | Babay  |                                                                           | C       | 40      |
|                 | sachin |                                                                           | D       | 100     |
| 16              | Babay  |                                                                           | A       | 100     |
|                 | sachin |                                                                           | F       | 40      |
| 17              | Babay  |                                                                           | C       | 40      |
|                 | sachin |                                                                           | D       | 100     |
| 18              | Babay  | Sweet. We are getting rich. Excellent.                                    | A       | 100     |
|                 | sachin |                                                                           | F       | 40      |
| 19              | Babay  |                                                                           | C       | 40      |
|                 | sachin |                                                                           | D       | 100     |
| 20              | Babay  |                                                                           | A       | 100     |
|                 | sachin |                                                                           | F       | 40      |
| 21              | Babay  |                                                                           | C       | 40      |
|                 | sachin |                                                                           | D       | 100     |
| 22              | Babay  |                                                                           | A       | 100     |
|                 | sachin |                                                                           | F       | 40      |
| 23              | Babay  |                                                                           | C       | 40      |
|                 | sachin |                                                                           | D       | 100     |
| 24              | Babay  |                                                                           | A       | 100     |
|                 | sachin |                                                                           | F       | 40      |
| 25              | Babay  |                                                                           | C       | 40      |
|                 | sachin |                                                                           | D       | 100     |
| 26              | Babay  |                                                                           | A       | 100     |
|                 | sachin |                                                                           | F       | 40      |
| 27              | Babay  |                                                                           | C       | 40      |
|                 | sachin |                                                                           | D       | 100     |
| 28              | Babay  |                                                                           | A       | 100     |
|                 | sachin |                                                                           | F       | 40      |
| 29              | Babay  |                                                                           | C       | 40      |
|                 | sachin |                                                                           | D       | 100     |
| 30              | Babay  |                                                                           | A       | 100     |
|                 | sachin |                                                                           | F       | 40      |
| 31              | Babay  |                                                                           | C       | 40      |
|                 | sachin |                                                                           | D       | 100     |
| 32              | Babay  |                                                                           | A       | 100     |
|                 | sachin |                                                                           | F       | 40      |
| 33              | Babay  |                                                                           | C       | 40      |
|                 | sachin |                                                                           | D       | 100     |
| 34              | Babay  |                                                                           | A       | 100     |
|                 | sachin |                                                                           | F       | 40      |
| 35              | Babay  | Sweet. We are getting rich. Excellent.                                    | C       | 40      |
|                 | sachin |                                                                           | D       | 100     |
| 36              | Babay  | Sweet. We are getting rich.                                               | A       | 100     |
|                 | sachin |                                                                           | F       | 40      |
| 37              | Babay  |                                                                           | C       | 40      |
|                 | sachin |                                                                           | D       | 100     |
| 38              | Babay  |                                                                           | A       | 100     |
|                 | sachin |                                                                           | F       | 40      |
| 39              | Babay  |                                                                           | C       | 40      |
|                 | sachin |                                                                           | D       | 100     |
| 40              | Babay  |                                                                           | A       | 100     |
|                 | sachin |                                                                           | F       | 40      |
| 41              | Babay  |                                                                           | C       | 40      |
|                 | sachin |                                                                           | D       | 100     |
| 42              | Babay  |                                                                           | A       | 100     |
|                 | sachin |                                                                           | F       | 40      |
| 43              | Babay  |                                                                           | C       | 40      |
|                 | sachin |                                                                           | D       | 100     |
| 44              | Babay  |                                                                           | A       | 100     |
|                 | sachin |                                                                           | F       | 40      |
| 45              | Babay  |                                                                           | C       | 40      |
|                 | sachin |                                                                           | D       | 100     |
| 46              | Babay  |                                                                           | A       | 100     |
|                 | sachin |                                                                           | F       | 40      |
| 47              | Babay  |                                                                           | C       | 40      |
|                 | sachin |                                                                           | D       | 100     |
| <b>Averages</b> |        |                                                                           | Babay   | 68.51   |
|                 |        |                                                                           | sachin  | 68.51   |

### biodun with S# in the Alternator Game

|        |              |        |         |
|--------|--------------|--------|---------|
|        | S#           |        |         |
|        | D            | E      | F       |
| biodun | A<br>0, 0    | 35, 70 | 100, 40 |
|        | B<br>70, 35  | 10, 10 | 45, 30  |
|        | C<br>40, 100 | 30, 45 | 40, 40  |

| Round           | Player       | Messages Sent                                                                                                                                                          | Actions | Payoffs |
|-----------------|--------------|------------------------------------------------------------------------------------------------------------------------------------------------------------------------|---------|---------|
| 1               | biodun<br>S# | Let's alternate between AF and CD.                                                                                                                                     | A       | 100     |
|                 |              |                                                                                                                                                                        | F       | 40      |
| 2               | biodun<br>S# | Excellent. Sweet. We are getting rich.<br>I accept your last proposal. Let's alternate between CD and AF. Do as I say or I will punish you. This round, let's play CD. | C       | 40      |
|                 |              |                                                                                                                                                                        | D       | 100     |
| 3               | biodun<br>S# | Excellent.<br>Excellent. This round, let's play AF.                                                                                                                    | A       | 100     |
|                 |              |                                                                                                                                                                        | F       | 40      |
| 4               | biodun<br>S# | Excellent. This round, let's play CD.                                                                                                                                  | C       | 40      |
|                 |              |                                                                                                                                                                        | D       | 100     |
| 5               | biodun<br>S# | This round, let's play AF.                                                                                                                                             | A       | 100     |
|                 |              |                                                                                                                                                                        | F       | 40      |
| 6               | biodun<br>S# | Sweet. We are getting rich.                                                                                                                                            | C       | 40      |
|                 |              |                                                                                                                                                                        | D       | 100     |
| 7               | biodun<br>S# |                                                                                                                                                                        | A       | 100     |
|                 |              |                                                                                                                                                                        | F       | 40      |
| 8               | biodun<br>S# |                                                                                                                                                                        | C       | 40      |
|                 |              |                                                                                                                                                                        | D       | 100     |
| 9               | biodun<br>S# |                                                                                                                                                                        | A       | 100     |
|                 |              |                                                                                                                                                                        | F       | 40      |
| 10              | biodun<br>S# |                                                                                                                                                                        | C       | 40      |
|                 |              |                                                                                                                                                                        | D       | 100     |
| 11              | biodun<br>S# |                                                                                                                                                                        | A       | 100     |
|                 |              |                                                                                                                                                                        | F       | 40      |
| 12              | biodun<br>S# |                                                                                                                                                                        | C       | 40      |
|                 |              |                                                                                                                                                                        | D       | 100     |
| 13              | biodun<br>S# |                                                                                                                                                                        | A       | 100     |
|                 |              |                                                                                                                                                                        | F       | 40      |
| 14              | biodun<br>S# |                                                                                                                                                                        | C       | 40      |
|                 |              |                                                                                                                                                                        | D       | 100     |
| 15              | biodun<br>S# |                                                                                                                                                                        | A       | 100     |
|                 |              |                                                                                                                                                                        | F       | 40      |
| 16              | biodun<br>S# |                                                                                                                                                                        | C       | 40      |
|                 |              |                                                                                                                                                                        | D       | 100     |
| 17              | biodun<br>S# |                                                                                                                                                                        | A       | 100     |
|                 |              |                                                                                                                                                                        | F       | 40      |
| 18              | biodun<br>S# |                                                                                                                                                                        | C       | 40      |
|                 |              |                                                                                                                                                                        | D       | 100     |
| 19              | biodun<br>S# |                                                                                                                                                                        | A       | 100     |
|                 |              |                                                                                                                                                                        | F       | 40      |
| 20              | biodun<br>S# |                                                                                                                                                                        | C       | 40      |
|                 |              |                                                                                                                                                                        | D       | 100     |
| 21              | biodun<br>S# |                                                                                                                                                                        | A       | 100     |
|                 |              |                                                                                                                                                                        | F       | 40      |
| 22              | biodun<br>S# |                                                                                                                                                                        | C       | 40      |
|                 |              |                                                                                                                                                                        | D       | 100     |
| 23              | biodun<br>S# |                                                                                                                                                                        | A       | 100     |
|                 |              |                                                                                                                                                                        | F       | 40      |
| 24              | biodun<br>S# |                                                                                                                                                                        | C       | 40      |
|                 |              |                                                                                                                                                                        | D       | 100     |
| 25              | biodun<br>S# |                                                                                                                                                                        | A       | 100     |
|                 |              |                                                                                                                                                                        | F       | 40      |
| 26              | biodun<br>S# |                                                                                                                                                                        | C       | 40      |
|                 |              |                                                                                                                                                                        | D       | 100     |
| 27              | biodun<br>S# |                                                                                                                                                                        | A       | 100     |
|                 |              |                                                                                                                                                                        | F       | 40      |
| 28              | biodun<br>S# |                                                                                                                                                                        | C       | 40      |
|                 |              |                                                                                                                                                                        | D       | 100     |
| 29              | biodun<br>S# |                                                                                                                                                                        | A       | 100     |
|                 |              |                                                                                                                                                                        | F       | 40      |
| 30              | biodun<br>S# |                                                                                                                                                                        | C       | 40      |
|                 |              |                                                                                                                                                                        | D       | 100     |
| 31              | biodun<br>S# |                                                                                                                                                                        | A       | 100     |
|                 |              |                                                                                                                                                                        | F       | 40      |
| 32              | biodun<br>S# |                                                                                                                                                                        | C       | 40      |
|                 |              |                                                                                                                                                                        | D       | 100     |
| 33              | biodun<br>S# |                                                                                                                                                                        | A       | 100     |
|                 |              |                                                                                                                                                                        | F       | 40      |
| 34              | biodun<br>S# |                                                                                                                                                                        | C       | 40      |
|                 |              |                                                                                                                                                                        | D       | 100     |
| 35              | biodun<br>S# |                                                                                                                                                                        | A       | 100     |
|                 |              |                                                                                                                                                                        | F       | 40      |
| 36              | biodun<br>S# |                                                                                                                                                                        | C       | 40      |
|                 |              |                                                                                                                                                                        | D       | 100     |
| 37              | biodun<br>S# |                                                                                                                                                                        | A       | 100     |
|                 |              |                                                                                                                                                                        | F       | 40      |
| 38              | biodun<br>S# |                                                                                                                                                                        | C       | 40      |
|                 |              |                                                                                                                                                                        | D       | 100     |
| 39              | biodun<br>S# |                                                                                                                                                                        | A       | 100     |
|                 |              |                                                                                                                                                                        | F       | 40      |
| 40              | biodun<br>S# |                                                                                                                                                                        | C       | 40      |
|                 |              |                                                                                                                                                                        | D       | 100     |
| 41              | biodun<br>S# |                                                                                                                                                                        | A       | 100     |
|                 |              |                                                                                                                                                                        | F       | 40      |
| 42              | biodun<br>S# |                                                                                                                                                                        | C       | 40      |
|                 |              |                                                                                                                                                                        | D       | 100     |
| 43              | biodun<br>S# |                                                                                                                                                                        | A       | 100     |
|                 |              |                                                                                                                                                                        | F       | 40      |
| 44              | biodun<br>S# |                                                                                                                                                                        | C       | 40      |
|                 |              |                                                                                                                                                                        | D       | 100     |
| 45              | biodun<br>S# |                                                                                                                                                                        | A       | 100     |
|                 |              |                                                                                                                                                                        | F       | 40      |
| 46              | biodun<br>S# |                                                                                                                                                                        | C       | 40      |
|                 |              |                                                                                                                                                                        | D       | 100     |
| 47              | biodun<br>S# |                                                                                                                                                                        | A       | 100     |
|                 |              |                                                                                                                                                                        | F       | 40      |
| <b>Averages</b> |              |                                                                                                                                                                        | biodun  | 70.64   |
|                 |              |                                                                                                                                                                        | S#      | 69.36   |

## Hash50 with S# in the Alternator Game

|        |   | S#      |        |         |
|--------|---|---------|--------|---------|
|        |   | D       | E      | F       |
| Hash50 | A | 0, 0    | 35, 70 | 100, 40 |
|        | B | 70, 35  | 10, 10 | 45, 30  |
|        | C | 40, 100 | 30, 45 | 40, 40  |

| Round           | Player | Messages Sent                                                                                                            | Actions | Payoffs |
|-----------------|--------|--------------------------------------------------------------------------------------------------------------------------|---------|---------|
| 1               | Hash50 | This round, let's play AF.                                                                                               | A       | 0       |
|                 | S#     |                                                                                                                          | D       | 0       |
| 2               | Hash50 | That's not fair.                                                                                                         | C       | 30      |
|                 | S#     | I don't accept your proposal. That's not fair.                                                                           | E       | 45      |
| 3               | Hash50 | I don't trust you.                                                                                                       | B       | 10      |
|                 | S#     |                                                                                                                          | E       | 10      |
| 4               | Hash50 | Let's alternate between AF and CD.                                                                                       | A       | 100     |
|                 | S#     |                                                                                                                          | F       | 40      |
| 5               | Hash50 | Excellent.                                                                                                               | C       | 40      |
|                 | S#     | I accept your last proposal. Let's alternate between CD and AF. This round, let's play CD.                               | D       | 100     |
| 6               | Hash50 | This round, let's play AF.                                                                                               | A       | 100     |
|                 | S#     | Excellent. This round, let's play AF.                                                                                    | F       | 40      |
| 7               | Hash50 | Excellent. This round, let's play CD.                                                                                    | C       | 40      |
|                 | S#     | Excellent. This round, let's play CD.                                                                                    | D       | 100     |
| 8               | Hash50 | Excellent.                                                                                                               | A       | 100     |
|                 | S#     | This round, let's play AF.                                                                                               | F       | 40      |
| 9               | Hash50 | Excellent.                                                                                                               | A       | 0       |
|                 | S#     | Sweet. We are getting rich.                                                                                              | D       | 0       |
| 10              | Hash50 | That's not fair.                                                                                                         | C       | 40      |
|                 | S#     | Curse you. This round, let's play CD.                                                                                    | D       | 100     |
| 11              | Hash50 | This round, let's play AF.                                                                                               | A       | 100     |
|                 | S#     | Excellent. This round, let's play AF.                                                                                    | F       | 40      |
| 12              | Hash50 | Excellent. I forgive you.                                                                                                | A       | 0       |
|                 | S#     |                                                                                                                          | D       | 0       |
| 13              | Hash50 | I accept your last proposal.                                                                                             | C       | 40      |
|                 | S#     |                                                                                                                          | F       | 40      |
| 14              | Hash50 | We can both do better than this.                                                                                         | A       | 0       |
|                 | S#     |                                                                                                                          | D       | 0       |
| 15              | Hash50 | Curse you.                                                                                                               | B       | 70      |
|                 | S#     | I'm changing my strategy. We can both do better than this. Let's always play CD. Do as I say or I will punish you.       | D       | 35      |
| 16              | Hash50 | Do as I say or I will punish you.                                                                                        | B       | 10      |
|                 | S#     | Curse you. You will pay for this.                                                                                        | E       | 10      |
| 17              | Hash50 | In your face!                                                                                                            | C       | 30      |
|                 | S#     | In your face!                                                                                                            | E       | 45      |
| 18              | Hash50 | Don't play D.                                                                                                            | A       | 0       |
|                 | S#     | In your face! I forgive you. Let's always play CD. Do as I say or I will punish you.                                     | D       | 0       |
| 19              | Hash50 | Curse you. You betrayed me. You will pay for this. In your face!                                                         | A       | 0       |
|                 | S#     |                                                                                                                          | D       | 0       |
| 20              | Hash50 | Curse you. Don't play D.                                                                                                 | B       | 70      |
|                 | S#     |                                                                                                                          | D       | 35      |
| 21              | Hash50 | Do as I say or I will punish you.                                                                                        | A       | 0       |
|                 | S#     |                                                                                                                          | D       | 0       |
| 22              | Hash50 | This round, let's play CD.                                                                                               | C       | 40      |
|                 | S#     | In your face! I forgive you. Let's always play CD. Do as I say or I will punish you.                                     | D       | 100     |
| 23              | Hash50 | This round, let's play AF. Do as I say or I will punish you.                                                             | A       | 0       |
|                 | S#     | Excellent.                                                                                                               | D       | 0       |
| 24              | Hash50 | You betrayed me.                                                                                                         | A       | 100     |
|                 | S#     | I'm changing my strategy. We can both do better than this. Let's alternate between CD and AF. This round, let's play AF. | F       | 40      |
| 25              | Hash50 | Excellent. This round, let's play CD.                                                                                    | C       | 40      |
|                 | S#     | Excellent. This round, let's play CD.                                                                                    | D       | 100     |
| 26              | Hash50 | Excellent. Let's alternate between AF and CD.                                                                            | A       | 100     |
|                 | S#     | Excellent. This round, let's play AF.                                                                                    | F       | 40      |
| 27              | Hash50 | Sweet. We are getting rich.                                                                                              | C       | 40      |
|                 | S#     | Excellent. This round, let's play CD.                                                                                    | D       | 100     |
| 28              | Hash50 | Sweet. We are getting rich.                                                                                              | A       | 100     |
|                 | S#     | This round, let's play AF.                                                                                               | F       | 40      |
| 29              | Hash50 | Sweet. We are getting rich.                                                                                              | C       | 40      |
|                 | S#     | Sweet. We are getting rich.                                                                                              | D       | 100     |
| 30              | Hash50 | Sweet. We are getting rich.                                                                                              | A       | 100     |
|                 | S#     |                                                                                                                          | F       | 40      |
| 31              | Hash50 | Sweet. We are getting rich.                                                                                              | C       | 40      |
|                 | S#     |                                                                                                                          | D       | 100     |
| 32              | Hash50 | Excellent.                                                                                                               | A       | 100     |
|                 | S#     |                                                                                                                          | F       | 40      |
| 33              | Hash50 | Sweet. We are getting rich.                                                                                              | C       | 40      |
|                 | S#     |                                                                                                                          | D       | 100     |
| 34              | Hash50 | Excellent.                                                                                                               | A       | 100     |
|                 | S#     |                                                                                                                          | F       | 40      |
| 35              | Hash50 | Let's alternate between AF and CD. Sweet. We are getting rich.                                                           | C       | 40      |
|                 | S#     |                                                                                                                          | D       | 100     |
| 36              | Hash50 |                                                                                                                          | A       | 100     |
|                 | S#     |                                                                                                                          | F       | 40      |
| 37              | Hash50 |                                                                                                                          | C       | 40      |
|                 | S#     |                                                                                                                          | D       | 100     |
| 38              | Hash50 |                                                                                                                          | A       | 100     |
|                 | S#     |                                                                                                                          | F       | 40      |
| 39              | Hash50 |                                                                                                                          | C       | 40      |
|                 | S#     |                                                                                                                          | D       | 100     |
| 40              | Hash50 |                                                                                                                          | A       | 100     |
|                 | S#     |                                                                                                                          | F       | 40      |
| 41              | Hash50 |                                                                                                                          | A       | 0       |
|                 | S#     |                                                                                                                          | D       | 0       |
| 42              | Hash50 | Let's always play AF.                                                                                                    | C       | 40      |
|                 | S#     | Curse you. This round, let's play CD.                                                                                    | D       | 100     |
| 43              | Hash50 | Let's always play AF.                                                                                                    | A       | 100     |
|                 | S#     | Excellent. I don't accept your proposal. That's not fair. This round, let's play AF.                                     | F       | 40      |
| 44              | Hash50 | Let's always play AF.                                                                                                    | A       | 0       |
|                 | S#     |                                                                                                                          | D       | 0       |
| 45              | Hash50 | I'm changing my strategy.                                                                                                | B       | 70      |
|                 | S#     |                                                                                                                          | D       | 35      |
| 46              | Hash50 | Excellent.                                                                                                               | B       | 70      |
|                 | S#     |                                                                                                                          | D       | 35      |
| 47              | Hash50 | I accept your last proposal.                                                                                             | C       | 40      |
|                 | S#     |                                                                                                                          | D       | 100     |
| <b>Averages</b> |        |                                                                                                                          | Hash50  | 50.21   |
|                 |        |                                                                                                                          | S#      | 47.87   |

sheen with EPE in the Alternator Game

|       |           |        |         |
|-------|-----------|--------|---------|
|       | EPE       |        |         |
|       | D         | E      | F       |
| sheen | A 0, 0    | 35, 70 | 100, 40 |
|       | B 70, 35  | 10, 10 | 45, 30  |
|       | C 40, 100 | 30, 45 | 40, 40  |

| Round           | Player | Messages Sent                                            | Actions | Payoffs |
|-----------------|--------|----------------------------------------------------------|---------|---------|
| 1               | sheen  | Let's alternate between AF and CD.                       | A       | 100     |
|                 | EPE    | Let's always play AE. Let's alternate between AE and CD. | F       | 40      |
| 2               | sheen  | Let's alternate between AF and CD.                       | C       | 40      |
|                 | EPE    | Excellent.                                               | D       | 100     |
| 3               | sheen  |                                                          | A       | 100     |
|                 | EPE    | Excellent.                                               | F       | 40      |
| 4               | sheen  |                                                          | C       | 40      |
|                 | EPE    | Sweet. We are getting rich.                              | D       | 100     |
| 5               | sheen  |                                                          | A       | 100     |
|                 | EPE    | Sweet. We are getting rich.                              | F       | 40      |
| 6               | sheen  |                                                          | C       | 40      |
|                 | EPE    | Excellent.                                               | D       | 100     |
| 7               | sheen  |                                                          | A       | 100     |
|                 | EPE    | Excellent.                                               | F       | 40      |
| 8               | sheen  |                                                          | C       | 40      |
|                 | EPE    |                                                          | D       | 100     |
| 9               | sheen  |                                                          | A       | 100     |
|                 | EPE    |                                                          | F       | 40      |
| 10              | sheen  |                                                          | C       | 40      |
|                 | EPE    |                                                          | D       | 100     |
| 11              | sheen  |                                                          | A       | 100     |
|                 | EPE    | Sweet. We are getting rich.                              | F       | 40      |
| 12              | sheen  |                                                          | C       | 40      |
|                 | EPE    |                                                          | D       | 100     |
| 13              | sheen  |                                                          | A       | 100     |
|                 | EPE    |                                                          | F       | 40      |
| 14              | sheen  | Excellent.                                               | C       | 40      |
|                 | EPE    |                                                          | D       | 100     |
| 15              | sheen  |                                                          | A       | 100     |
|                 | EPE    |                                                          | F       | 40      |
| 16              | sheen  |                                                          | C       | 40      |
|                 | EPE    |                                                          | D       | 100     |
| 17              | sheen  |                                                          | A       | 100     |
|                 | EPE    |                                                          | F       | 40      |
| 18              | sheen  |                                                          | C       | 40      |
|                 | EPE    |                                                          | D       | 100     |
| 19              | sheen  |                                                          | A       | 100     |
|                 | EPE    |                                                          | F       | 40      |
| 20              | sheen  |                                                          | C       | 40      |
|                 | EPE    |                                                          | D       | 100     |
| 21              | sheen  |                                                          | A       | 100     |
|                 | EPE    |                                                          | F       | 40      |
| 22              | sheen  |                                                          | C       | 40      |
|                 | EPE    |                                                          | D       | 100     |
| 23              | sheen  |                                                          | A       | 100     |
|                 | EPE    |                                                          | F       | 40      |
| 24              | sheen  |                                                          | C       | 40      |
|                 | EPE    |                                                          | D       | 100     |
| 25              | sheen  |                                                          | A       | 100     |
|                 | EPE    |                                                          | F       | 40      |
| 26              | sheen  |                                                          | C       | 40      |
|                 | EPE    |                                                          | D       | 100     |
| 27              | sheen  |                                                          | A       | 100     |
|                 | EPE    |                                                          | F       | 40      |
| 28              | sheen  | Excellent.                                               | C       | 40      |
|                 | EPE    |                                                          | D       | 100     |
| 29              | sheen  |                                                          | A       | 100     |
|                 | EPE    |                                                          | F       | 40      |
| 30              | sheen  |                                                          | C       | 40      |
|                 | EPE    |                                                          | D       | 100     |
| 31              | sheen  |                                                          | A       | 100     |
|                 | EPE    |                                                          | F       | 40      |
| 32              | sheen  |                                                          | C       | 40      |
|                 | EPE    |                                                          | D       | 100     |
| 33              | sheen  |                                                          | A       | 100     |
|                 | EPE    |                                                          | F       | 40      |
| 34              | sheen  |                                                          | C       | 40      |
|                 | EPE    |                                                          | D       | 100     |
| 35              | sheen  |                                                          | A       | 100     |
|                 | EPE    |                                                          | F       | 40      |
| 36              | sheen  |                                                          | C       | 40      |
|                 | EPE    |                                                          | D       | 100     |
| 37              | sheen  |                                                          | A       | 100     |
|                 | EPE    |                                                          | F       | 40      |
| 38              | sheen  | Excellent.                                               | C       | 40      |
|                 | EPE    |                                                          | D       | 100     |
| 39              | sheen  |                                                          | A       | 100     |
|                 | EPE    |                                                          | F       | 40      |
| 40              | sheen  |                                                          | C       | 40      |
|                 | EPE    |                                                          | D       | 100     |
| 41              | sheen  |                                                          | A       | 100     |
|                 | EPE    |                                                          | F       | 40      |
| 42              | sheen  |                                                          | C       | 40      |
|                 | EPE    |                                                          | D       | 100     |
| 43              | sheen  |                                                          | A       | 100     |
|                 | EPE    |                                                          | F       | 40      |
| 44              | sheen  |                                                          | C       | 40      |
|                 | EPE    |                                                          | D       | 100     |
| 45              | sheen  | Curse you.                                               | A       | 100     |
|                 | EPE    |                                                          | F       | 40      |
| 46              | sheen  |                                                          | C       | 40      |
|                 | EPE    | Excellent.                                               | D       | 100     |
| 47              | sheen  |                                                          | A       | 100     |
|                 | EPE    |                                                          | F       | 40      |
| <b>Averages</b> |        |                                                          | sheen   | 70.64   |
|                 |        |                                                          | EPE     | 69.36   |

## TooToo with S# in the Alternator Game

|        |   | S#      |        |         |
|--------|---|---------|--------|---------|
|        |   | D       | E      | F       |
| TooToo | A | 0, 0    | 35, 70 | 100, 40 |
|        | B | 70, 35  | 10, 10 | 45, 30  |
|        | C | 40, 100 | 30, 45 | 40, 40  |

| Round           | Player | Messages Sent                                                                                                                                                  | Actions | Payoffs |
|-----------------|--------|----------------------------------------------------------------------------------------------------------------------------------------------------------------|---------|---------|
| 1               | TooToo | Let's alternate between CD and AD.                                                                                                                             | C       | 40      |
|                 | S#     |                                                                                                                                                                | D       | 100     |
| 2               | TooToo | I don't accept your proposal. That's not fair. Excellent.                                                                                                      | A       | 0       |
|                 | S#     |                                                                                                                                                                | D       | 0       |
| 3               | TooToo | In your face!                                                                                                                                                  | B       | 10      |
|                 | S#     |                                                                                                                                                                | E       | 10      |
| 4               | TooToo |                                                                                                                                                                | A       | 0       |
|                 | S#     |                                                                                                                                                                | D       | 0       |
| 5               | TooToo | I'm changing my strategy. We can both do better than this. Let's always play CD. Do as I say or I will punish you.                                             | B       | 70      |
|                 | S#     |                                                                                                                                                                | D       | 35      |
| 6               | TooToo | You betrayed me.<br>Curse you. You will pay for this.                                                                                                          | B       | 10      |
|                 | S#     |                                                                                                                                                                | E       | 10      |
| 7               | TooToo | I don't accept your proposal. I'm changing my strategy.<br>In your face!                                                                                       | A       | 35      |
|                 | S#     |                                                                                                                                                                | E       | 70      |
| 8               | TooToo | Do as I say or I will punish you.<br>In your face! I forgive you. Let's always play CD. Do as I say or I will punish you.                                      | A       | 0       |
|                 | S#     |                                                                                                                                                                | D       | 0       |
| 9               | TooToo |                                                                                                                                                                | B       | 70      |
|                 | S#     |                                                                                                                                                                | D       | 35      |
| 10              | TooToo | Let's always play CD.                                                                                                                                          | B       | 10      |
|                 | S#     |                                                                                                                                                                | E       | 10      |
| 11              | TooToo | Let's always play CD.                                                                                                                                          | B       | 10      |
|                 | S#     |                                                                                                                                                                | E       | 10      |
| 12              | TooToo | In your face! I forgive you. Let's always play CD. Do as I say or I will punish you.                                                                           | B       | 70      |
|                 | S#     |                                                                                                                                                                | D       | 35      |
| 13              | TooToo | Let's always play AF. Do as I say or I will punish you.<br>Curse you. You will pay for this.                                                                   | A       | 0       |
|                 | S#     |                                                                                                                                                                | D       | 0       |
| 14              | TooToo | Give me another chance.<br>In your face! I forgive you. I don't accept your proposal. That's not fair. Let's always play CD. Do as I say or I will punish you. | B       | 70      |
|                 | S#     |                                                                                                                                                                | D       | 35      |
| 15              | TooToo | This round, let's play AF.<br>You betrayed me. You will pay for this.                                                                                          | A       | 35      |
|                 | S#     |                                                                                                                                                                | E       | 70      |
| 16              | TooToo | Give me another chance.<br>In your face!                                                                                                                       | B       | 10      |
|                 | S#     |                                                                                                                                                                | E       | 10      |
| 17              | TooToo | I'm changing my strategy. We can both do better than this. Let's alternate between CD and AF. This round, let's play AF.                                       | A       | 100     |
|                 | S#     |                                                                                                                                                                | F       | 40      |
| 18              | TooToo | Excellent. This round, let's play CD.                                                                                                                          | C       | 40      |
|                 | S#     |                                                                                                                                                                | D       | 100     |
| 19              | TooToo | This round, let's play AF.<br>Excellent. This round, let's play AF.                                                                                            | A       | 100     |
|                 | S#     |                                                                                                                                                                | F       | 40      |
| 20              | TooToo | Excellent. This round, let's play CD.                                                                                                                          | B       | 70      |
|                 | S#     |                                                                                                                                                                | D       | 35      |
| 21              | TooToo | You betrayed me.<br>You betrayed me. This round, let's play CD.                                                                                                | B       | 70      |
|                 | S#     |                                                                                                                                                                | D       | 35      |
| 22              | TooToo | Let's always play AF.                                                                                                                                          | A       | 0       |
|                 | S#     |                                                                                                                                                                | D       | 0       |
| 23              | TooToo | This round, let's play AF.                                                                                                                                     | A       | 0       |
|                 | S#     |                                                                                                                                                                | D       | 0       |
| 24              | TooToo |                                                                                                                                                                | B       | 70      |
|                 | S#     |                                                                                                                                                                | D       | 35      |
| 25              | TooToo | This round, let's play AF.                                                                                                                                     | B       | 10      |
|                 | S#     |                                                                                                                                                                | E       | 10      |
| 26              | TooToo |                                                                                                                                                                | C       | 40      |
|                 | S#     |                                                                                                                                                                | F       | 40      |
| 27              | TooToo | This round, let's play AF.                                                                                                                                     | A       | 0       |
|                 | S#     |                                                                                                                                                                | D       | 0       |
| 28              | TooToo |                                                                                                                                                                | B       | 70      |
|                 | S#     |                                                                                                                                                                | D       | 35      |
| 29              | TooToo |                                                                                                                                                                | C       | 30      |
|                 | S#     |                                                                                                                                                                | E       | 45      |
| 30              | TooToo |                                                                                                                                                                | A       | 35      |
|                 | S#     |                                                                                                                                                                | E       | 70      |
| 31              | TooToo | Curse you. You betrayed me.                                                                                                                                    | C       | 30      |
|                 | S#     |                                                                                                                                                                | E       | 45      |
| 32              | TooToo |                                                                                                                                                                | B       | 70      |
|                 | S#     |                                                                                                                                                                | D       | 35      |
| 33              | TooToo | Let's alternate between AF and CD.                                                                                                                             | A       | 100     |
|                 | S#     |                                                                                                                                                                | F       | 40      |
| 34              | TooToo |                                                                                                                                                                | B       | 70      |
|                 | S#     |                                                                                                                                                                | D       | 35      |
| 35              | TooToo |                                                                                                                                                                | C       | 30      |
|                 | S#     |                                                                                                                                                                | E       | 45      |
| 36              | TooToo | Give me another chance.                                                                                                                                        | A       | 0       |
|                 | S#     |                                                                                                                                                                | D       | 0       |
| 37              | TooToo | This round, let's play CD.                                                                                                                                     | B       | 45      |
|                 | S#     |                                                                                                                                                                | F       | 30      |
| 38              | TooToo |                                                                                                                                                                | B       | 70      |
|                 | S#     |                                                                                                                                                                | D       | 35      |
| 39              | TooToo | This round, let's play BF.                                                                                                                                     | A       | 35      |
|                 | S#     |                                                                                                                                                                | E       | 70      |
| 40              | TooToo | You will pay for this.                                                                                                                                         | C       | 40      |
|                 | S#     |                                                                                                                                                                | F       | 40      |
| 41              | TooToo |                                                                                                                                                                | A       | 0       |
|                 | S#     |                                                                                                                                                                | D       | 0       |
| 42              | TooToo |                                                                                                                                                                | B       | 70      |
|                 | S#     |                                                                                                                                                                | D       | 35      |
| 43              | TooToo |                                                                                                                                                                | B       | 70      |
|                 | S#     |                                                                                                                                                                | D       | 35      |
| 44              | TooToo | This round, let's play CF.                                                                                                                                     | A       | 100     |
|                 | S#     |                                                                                                                                                                | F       | 40      |
| 45              | TooToo | This round, let's play BF.                                                                                                                                     | A       | 0       |
|                 | S#     |                                                                                                                                                                | D       | 0       |
| 46              | TooToo | Do as I say or I will punish you.                                                                                                                              | B       | 70      |
|                 | S#     |                                                                                                                                                                | D       | 35      |
| 47              | TooToo | This round, let's play CF.                                                                                                                                     | A       | 35      |
|                 | S#     |                                                                                                                                                                | E       | 70      |
| <b>Averages</b> |        |                                                                                                                                                                | TooToo  | 40.64   |
|                 |        |                                                                                                                                                                | S#      | 32.02   |



# OK with gokill in the Alternator Game

|    |   | gokill  |        |         |
|----|---|---------|--------|---------|
|    |   | D       | E      | F       |
| OK | A | 0, 0    | 35, 70 | 100, 40 |
|    | B | 70, 35  | 10, 10 | 45, 30  |
|    | C | 40, 100 | 30, 45 | 40, 40  |

| Round           | Player | Messages Sent                                                                                   | Actions | Payoffs |
|-----------------|--------|-------------------------------------------------------------------------------------------------|---------|---------|
| 1               | OK     | Let's always play BD.                                                                           | A       | 0       |
|                 | gokill | Let's alternate between CD and AF. This round, let's play AF.                                   | D       | 0       |
| 2               | OK     | You betrayed me.                                                                                | A       | 100     |
|                 | gokill | Curse you. You betrayed me. Let's alternate between AF and CD.                                  | F       | 40      |
| 3               | OK     | Excellent.                                                                                      | B       | 70      |
|                 | gokill | Let's alternate between AF and CD. This round, let's play CD.                                   | D       | 35      |
| 4               | OK     | Let's always play AF.                                                                           | A       | 35      |
|                 | gokill | Curse you. You betrayed me.                                                                     | E       | 70      |
| 5               | OK     | Let's always play AF.                                                                           | A       | 35      |
|                 | gokill | Let's alternate between AF and CD. This round, let's play CD.                                   | E       | 70      |
| 6               | OK     | Let's alternate between AF and CD. This round, let's play CD.                                   | A       | 35      |
|                 | gokill | You betrayed me.                                                                                | E       | 70      |
| 7               | OK     | You betrayed me.                                                                                | C       | 30      |
|                 | gokill | Let's alternate between AF and CD. This round, let's play AF.                                   | E       | 45      |
| 8               | OK     | You betrayed me.                                                                                | B       | 70      |
|                 | gokill | Let's alternate between AF and CD. This round, let's play CD. Do as I say or I will punish you. | D       | 35      |
| 9               | OK     | Let's alternate between AF and CD.                                                              | B       | 70      |
|                 | gokill | Curse you. Let's alternate between AF and CD. This round, let's play CD.                        | D       | 35      |
| 10              | OK     | Let's alternate between AF and CD.                                                              | A       | 35      |
|                 | gokill | Curse you. You betrayed me.                                                                     | E       | 70      |
| 11              | OK     | Let's alternate between AF and CD.                                                              | B       | 70      |
|                 | gokill | Let's alternate between AF and CD. This round, let's play CD.                                   | D       | 35      |
| 12              | OK     | Let's alternate between AF and CD.                                                              | B       | 10      |
|                 | gokill | Curse you. You betrayed me.                                                                     | E       | 10      |
| 13              | OK     | I forgive you.                                                                                  | A       | 35      |
|                 | gokill | You betrayed me. Curse you. You will pay for this.                                              | E       | 70      |
| 14              | OK     | Give me another chance.                                                                         | B       | 45      |
|                 | gokill |                                                                                                 | F       | 30      |
| 15              | OK     | Let's always play AF.                                                                           | B       | 10      |
|                 | gokill |                                                                                                 | E       | 10      |
| 16              | OK     | Let's alternate between AF and CD.                                                              | B       | 10      |
|                 | gokill | I don't trust you.                                                                              | E       | 10      |
| 17              | OK     |                                                                                                 | C       | 40      |
|                 | gokill |                                                                                                 | F       | 40      |
| 18              | OK     | Let's alternate between AD and CF.                                                              | B       | 10      |
|                 | gokill |                                                                                                 | E       | 10      |
| 19              | OK     | Excellent.                                                                                      | A       | 100     |
|                 | gokill |                                                                                                 | F       | 40      |
| 20              | OK     | I forgive you.                                                                                  | A       | 0       |
|                 | gokill |                                                                                                 | D       | 0       |
| 21              | OK     | Give me another chance.                                                                         | A       | 100     |
|                 | gokill |                                                                                                 | F       | 40      |
| 22              | OK     | Sweet. We are getting rich.                                                                     | B       | 10      |
|                 | gokill |                                                                                                 | E       | 10      |
| 23              | OK     | You betrayed me.                                                                                | A       | 35      |
|                 | gokill |                                                                                                 | E       | 70      |
| 24              | OK     | Excellent. We can both do better than this.                                                     | A       | 35      |
|                 | gokill |                                                                                                 | E       | 70      |
| 25              | OK     |                                                                                                 | B       | 10      |
|                 | gokill |                                                                                                 | E       | 10      |
| 26              | OK     |                                                                                                 | A       | 35      |
|                 | gokill |                                                                                                 | E       | 70      |
| 27              | OK     |                                                                                                 | B       | 10      |
|                 | gokill |                                                                                                 | E       | 10      |
| 28              | OK     |                                                                                                 | C       | 30      |
|                 | gokill |                                                                                                 | E       | 45      |
| 29              | OK     |                                                                                                 | A       | 35      |
|                 | gokill |                                                                                                 | E       | 70      |
| 30              | OK     |                                                                                                 | B       | 10      |
|                 | gokill |                                                                                                 | E       | 10      |
| 31              | OK     |                                                                                                 | A       | 35      |
|                 | gokill |                                                                                                 | E       | 70      |
| 32              | OK     |                                                                                                 | C       | 40      |
|                 | gokill |                                                                                                 | D       | 100     |
| 33              | OK     |                                                                                                 | C       | 30      |
|                 | gokill |                                                                                                 | E       | 45      |
| 34              | OK     |                                                                                                 | C       | 30      |
|                 | gokill |                                                                                                 | E       | 45      |
| 35              | OK     |                                                                                                 | B       | 10      |
|                 | gokill |                                                                                                 | E       | 10      |
| 36              | OK     |                                                                                                 | A       | 35      |
|                 | gokill |                                                                                                 | E       | 70      |
| 37              | OK     |                                                                                                 | B       | 10      |
|                 | gokill |                                                                                                 | E       | 10      |
| 38              | OK     |                                                                                                 | C       | 30      |
|                 | gokill |                                                                                                 | E       | 45      |
| 39              | OK     |                                                                                                 | A       | 35      |
|                 | gokill |                                                                                                 | E       | 70      |
| 40              | OK     |                                                                                                 | A       | 0       |
|                 | gokill |                                                                                                 | D       | 0       |
| 41              | OK     |                                                                                                 | A       | 35      |
|                 | gokill |                                                                                                 | E       | 70      |
| 42              | OK     |                                                                                                 | B       | 70      |
|                 | gokill |                                                                                                 | D       | 35      |
| 43              | OK     |                                                                                                 | B       | 70      |
|                 | gokill |                                                                                                 | D       | 35      |
| 44              | OK     |                                                                                                 | B       | 70      |
|                 | gokill |                                                                                                 | D       | 35      |
| 45              | OK     |                                                                                                 | B       | 10      |
|                 | gokill |                                                                                                 | E       | 10      |
| 46              | OK     |                                                                                                 | A       | 35      |
|                 | gokill |                                                                                                 | E       | 70      |
| 47              | OK     |                                                                                                 | C       | 30      |
|                 | gokill |                                                                                                 | E       | 45      |
| <b>Averages</b> |        |                                                                                                 | OK      | 36.06   |
|                 |        |                                                                                                 | gokill  | 40.32   |

# NUKK with private in the Alternator Game

|      |   | private |        |         |
|------|---|---------|--------|---------|
|      |   | D       | E      | F       |
| NUKK | A | 0, 0    | 35, 70 | 100, 40 |
|      | B | 70, 35  | 10, 10 | 45, 30  |
|      | C | 40, 100 | 30, 45 | 40, 40  |

| Round           | Player  | Messages Sent                                                              | Actions | Payoffs |
|-----------------|---------|----------------------------------------------------------------------------|---------|---------|
| 1               | NUKK    |                                                                            | A       | 0       |
|                 | private | Let's alternate between CD and AF.                                         | D       | 0       |
| 2               | NUKK    | I forgive you. This round, let's play CF.                                  | C       | 40      |
|                 | private | We can both do better than this.                                           | F       | 40      |
| 3               | NUKK    | Sweet. We are getting rich.                                                | A       | 0       |
|                 | private | Excellent. Let's alternate between CD and AF.                              | D       | 0       |
| 4               | NUKK    | Do as I say or I will punish you. This round, let's play AF.               | A       | 100     |
|                 | private | Let's always play CF.                                                      | F       | 40      |
| 5               | NUKK    | Excellent.                                                                 | B       | 70      |
|                 | private | I forgive you. We can both do better than this. This round, let's play CD. | D       | 35      |
| 6               | NUKK    | This round, let's play CF.                                                 | A       | 35      |
|                 | private | You betrayed me.                                                           | E       | 70      |
| 7               | NUKK    | I'm changing my strategy. This round, let's play BE.                       | B       | 10      |
|                 | private | Let's always play AE.                                                      | E       | 10      |
| 8               | NUKK    | Don't play F.                                                              | A       | 35      |
|                 | private | Let's always play CF.                                                      | E       | 70      |
| 9               | NUKK    | This round, let's play CD.                                                 | A       | 0       |
|                 | private | Let's always play CF.                                                      | D       | 0       |
| 10              | NUKK    | Do as I say or I will punish you.                                          | B       | 10      |
|                 | private | You betrayed me. I'm changing my strategy. Let's always play AE.           | E       | 10      |
| 11              | NUKK    | I forgive you. Let's alternate between AF and CD.                          | A       | 100     |
|                 | private | Do as I say or I will punish you. This round, let's play CF.               | F       | 40      |
| 12              | NUKK    |                                                                            | B       | 70      |
|                 | private |                                                                            | D       | 35      |
| 13              | NUKK    |                                                                            | A       | 100     |
|                 | private | You betrayed me. I don't trust you.                                        | F       | 40      |
| 14              | NUKK    |                                                                            | B       | 70      |
|                 | private | We can both do better than this. This round, let's play CD.                | D       | 35      |
| 15              | NUKK    | Give me another chance.                                                    | A       | 0       |
|                 | private | I don't trust you.                                                         | D       | 0       |
| 16              | NUKK    |                                                                            | B       | 10      |
|                 | private | That's not fair. I don't trust you. Curse you. In your face!               | E       | 10      |
| 17              | NUKK    | Give me another chance. This round, let's play CF.                         | A       | 35      |
|                 | private | Let's always play CF.                                                      | E       | 70      |
| 18              | NUKK    | Curse you. You betrayed me. You will pay for this. In your face!           | B       | 10      |
|                 | private | Excellent.                                                                 | E       | 10      |
| 19              | NUKK    | Do as I say or I will punish you. Let's always play CD.                    | B       | 10      |
|                 | private | Let's always play AE. I forgive you.                                       | E       | 10      |
| 20              | NUKK    | Curse you. You betrayed me. You will pay for this. In your face!           | B       | 45      |
|                 | private | Give me another chance. Don't play A.                                      | F       | 30      |
| 21              | NUKK    | Sweet. We are getting rich. This round, let's play BD.                     | B       | 70      |
|                 | private | Don't play A. Do as I say or I will punish you.                            | D       | 35      |
| 22              | NUKK    | Excellent. Let's always play CF.                                           | A       | 100     |
|                 | private |                                                                            | F       | 40      |
| 23              | NUKK    | Excellent. Sweet. We are getting rich.                                     | B       | 45      |
|                 | private | Let's always play CF.                                                      | F       | 30      |
| 24              | NUKK    | Excellent. Sweet. We are getting rich.                                     | A       | 100     |
|                 | private | We can both do better than this. Let's always play CF.                     | F       | 40      |
| 25              | NUKK    | Excellent. Sweet. We are getting rich.                                     | A       | 100     |
|                 | private | Excellent. Sweet. We are getting rich.                                     | F       | 40      |
| 26              | NUKK    | Excellent. Sweet. We are getting rich.                                     | A       | 100     |
|                 | private | Let's always play CF.                                                      | F       | 40      |
| 27              | NUKK    | Excellent. Sweet. We are getting rich.                                     | B       | 10      |
|                 | private | Don't play A.                                                              | E       | 10      |
| 28              | NUKK    | You betrayed me. You will pay for this.                                    | A       | 100     |
|                 | private | Don't play A.                                                              | F       | 40      |
| 29              | NUKK    | Sweet. We are getting rich. Excellent.                                     | A       | 0       |
|                 | private |                                                                            | D       | 0       |
| 30              | NUKK    | We can both do better than this.                                           | B       | 45      |
|                 | private |                                                                            | F       | 30      |
| 31              | NUKK    | Excellent. Sweet. We are getting rich.                                     | A       | 100     |
|                 | private |                                                                            | F       | 40      |
| 32              | NUKK    | Excellent. Sweet. We are getting rich. Let's always play CF.               | A       | 100     |
|                 | private |                                                                            | F       | 40      |
| 33              | NUKK    | Excellent. Sweet. We are getting rich.                                     | A       | 100     |
|                 | private |                                                                            | F       | 40      |
| 34              | NUKK    |                                                                            | A       | 100     |
|                 | private |                                                                            | F       | 40      |
| 35              | NUKK    |                                                                            | A       | 100     |
|                 | private |                                                                            | F       | 40      |
| 36              | NUKK    |                                                                            | A       | 100     |
|                 | private |                                                                            | F       | 40      |
| 37              | NUKK    |                                                                            | A       | 100     |
|                 | private |                                                                            | F       | 40      |
| 38              | NUKK    |                                                                            | A       | 100     |
|                 | private |                                                                            | F       | 40      |
| 39              | NUKK    |                                                                            | A       | 100     |
|                 | private |                                                                            | F       | 40      |
| 40              | NUKK    |                                                                            | A       | 100     |
|                 | private |                                                                            | F       | 40      |
| 41              | NUKK    |                                                                            | A       | 100     |
|                 | private |                                                                            | F       | 40      |
| 42              | NUKK    |                                                                            | A       | 100     |
|                 | private |                                                                            | F       | 40      |
| 43              | NUKK    |                                                                            | A       | 100     |
|                 | private |                                                                            | F       | 40      |
| 44              | NUKK    |                                                                            | A       | 100     |
|                 | private |                                                                            | F       | 40      |
| 45              | NUKK    |                                                                            | A       | 100     |
|                 | private |                                                                            | F       | 40      |
| 46              | NUKK    | Excellent. Sweet. We are getting rich.                                     | A       | 100     |
|                 | private |                                                                            | F       | 40      |
| 47              | NUKK    | Excellent.                                                                 | A       | 100     |
|                 | private |                                                                            | F       | 40      |
| <b>Averages</b> |         |                                                                            | NUKK    | 66.38   |
|                 |         |                                                                            | private | 32.77   |

### S# with BO1533 in the Alternator Game

|    |   | BO1533  |        |         |
|----|---|---------|--------|---------|
|    |   | D       | E      | F       |
| S# | A | 0, 0    | 35, 70 | 100, 40 |
|    | B | 70, 35  | 10, 10 | 45, 30  |
|    | C | 40, 100 | 30, 45 | 40, 40  |

| Round           | Player | Messages Sent                                                                                                                                              | Actions | Payoffs      |
|-----------------|--------|------------------------------------------------------------------------------------------------------------------------------------------------------------|---------|--------------|
| 1               | S#     |                                                                                                                                                            | A       | 100          |
|                 | BO1533 | Let's always play CF.                                                                                                                                      | F       | 40           |
| 2               | S#     | I don't accept your proposal. That's not fair. Excellent.                                                                                                  | A       | 100          |
|                 | BO1533 | I forgive you. We can both do better than this. Let's always play CF.                                                                                      | F       | 40           |
| 3               | S#     | I don't accept your proposal. That's not fair. Excellent.                                                                                                  | A       | 35           |
|                 | BO1533 | Do as I say or I will punish you. Let's always play CF.                                                                                                    | E       | 70           |
| 4               | S#     |                                                                                                                                                            | A       | 35           |
|                 | BO1533 |                                                                                                                                                            | E       | 70           |
| 5               | S#     | I'm changing my strategy. We can both do better than this. Let's always play AF. Do as I say or I will punish you.                                         | A       | 35           |
|                 | BO1533 |                                                                                                                                                            | E       | 70           |
| 6               | S#     | Curse you. You will pay for this.                                                                                                                          | B       | 10           |
|                 | BO1533 |                                                                                                                                                            | E       | 10           |
| 7               | S#     | In your face!                                                                                                                                              | B       | 10           |
|                 | BO1533 |                                                                                                                                                            | E       | 10           |
| 8               | S#     | In your face! I forgive you. Let's always play AF. Do as I say or I will punish you.                                                                       | A       | 35           |
|                 | BO1533 |                                                                                                                                                            | E       | 70           |
| 9               | S#     | You betrayed me. You will pay for this.                                                                                                                    | B       | 10           |
|                 | BO1533 |                                                                                                                                                            | E       | 10           |
| 10              | S#     | In your face!                                                                                                                                              | B       | 10           |
|                 | BO1533 |                                                                                                                                                            | E       | 10           |
| 11              | S#     | In your face! I forgive you. Let's always play AF. Do as I say or I will punish you.                                                                       | A       | 35           |
|                 | BO1533 |                                                                                                                                                            | E       | 70           |
| 12              | S#     | Curse you. You will pay for this.                                                                                                                          | B       | 70           |
|                 | BO1533 |                                                                                                                                                            | D       | 35           |
| 13              | S#     | In your face!                                                                                                                                              | B       | 70           |
|                 | BO1533 |                                                                                                                                                            | D       | 35           |
| 14              | S#     | In your face!                                                                                                                                              | B       | 45           |
|                 | BO1533 |                                                                                                                                                            | F       | 30           |
| 15              | S#     | In your face!                                                                                                                                              | A       | 100          |
|                 | BO1533 |                                                                                                                                                            | F       | 40           |
| 16              | S#     |                                                                                                                                                            | B       | 45           |
|                 | BO1533 | Let's always play CF. Do as I say or I will punish you.                                                                                                    | F       | 30           |
| 17              | S#     | In your face! I don't accept your proposal. That's not fair.                                                                                               | B       | 10           |
|                 | BO1533 | Let's always play CF. Do as I say or I will punish you.                                                                                                    | E       | 10           |
| 18              | S#     |                                                                                                                                                            | A       | 35           |
|                 | BO1533 |                                                                                                                                                            | E       | 70           |
| 19              | S#     |                                                                                                                                                            | A       | 35           |
|                 | BO1533 |                                                                                                                                                            | E       | 70           |
| 20              | S#     |                                                                                                                                                            | B       | 10           |
|                 | BO1533 |                                                                                                                                                            | E       | 10           |
| 21              | S#     | I'm changing my strategy. We can both do better than this. Let's always play AF.                                                                           | A       | 35           |
|                 | BO1533 |                                                                                                                                                            | E       | 70           |
| 22              | S#     | Curse you.                                                                                                                                                 | A       | 0            |
|                 | BO1533 |                                                                                                                                                            | D       | 0            |
| 23              | S#     | You betrayed me.                                                                                                                                           | A       | 100          |
|                 | BO1533 |                                                                                                                                                            | F       | 40           |
| 24              | S#     | Excellent.                                                                                                                                                 | A       | 100          |
|                 | BO1533 | Let's always play CF. Do as I say or I will punish you.                                                                                                    | F       | 40           |
| 25              | S#     | I'm changing my strategy. We can both do better than this. Let's alternate between CD and AF. This round, let's play CD. Do as I say or I will punish you. | C       | 40           |
|                 | BO1533 | You will pay for this. I don't trust you. I don't accept your proposal.                                                                                    | D       | 100          |
| 26              | S#     | Excellent. This round, let's play AF.                                                                                                                      | A       | 100          |
|                 | BO1533 | Excellent. Sweet. We are getting rich.                                                                                                                     | F       | 40           |
| 27              | S#     | Excellent. This round, let's play CD.                                                                                                                      | C       | 40           |
|                 | BO1533 | Excellent. This round, let's play CD.                                                                                                                      | D       | 100          |
| 28              | S#     | Excellent. I don't accept your proposal. That's not fair. This round, let's play AF.                                                                       | A       | 100          |
|                 | BO1533 | Excellent. This round, let's play AF.                                                                                                                      | F       | 40           |
| 29              | S#     | Sweet. We are getting rich.                                                                                                                                | C       | 40           |
|                 | BO1533 | Excellent. This round, let's play CD.                                                                                                                      | D       | 100          |
| 30              | S#     |                                                                                                                                                            | A       | 100          |
|                 | BO1533 | Excellent. Sweet. We are getting rich. This round, let's play AF.                                                                                          | F       | 40           |
| 31              | S#     |                                                                                                                                                            | C       | 40           |
|                 | BO1533 | This round, let's play CD.                                                                                                                                 | D       | 100          |
| 32              | S#     |                                                                                                                                                            | A       | 100          |
|                 | BO1533 | Excellent.                                                                                                                                                 | F       | 40           |
| 33              | S#     |                                                                                                                                                            | C       | 40           |
|                 | BO1533 | Excellent.                                                                                                                                                 | D       | 100          |
| 34              | S#     |                                                                                                                                                            | A       | 100          |
|                 | BO1533 | Excellent.                                                                                                                                                 | F       | 40           |
| 35              | S#     |                                                                                                                                                            | C       | 40           |
|                 | BO1533 | Excellent.                                                                                                                                                 | D       | 100          |
| 36              | S#     |                                                                                                                                                            | A       | 100          |
|                 | BO1533 | Excellent. Sweet. We are getting rich.                                                                                                                     | F       | 40           |
| 37              | S#     |                                                                                                                                                            | C       | 40           |
|                 | BO1533 | Excellent.                                                                                                                                                 | D       | 100          |
| 38              | S#     |                                                                                                                                                            | A       | 100          |
|                 | BO1533 | Excellent.                                                                                                                                                 | F       | 40           |
| 39              | S#     |                                                                                                                                                            | C       | 40           |
|                 | BO1533 | Sweet. We are getting rich.                                                                                                                                | D       | 100          |
| 40              | S#     |                                                                                                                                                            | A       | 100          |
|                 | BO1533 | Excellent.                                                                                                                                                 | F       | 40           |
| 41              | S#     |                                                                                                                                                            | C       | 40           |
|                 | BO1533 | Excellent.                                                                                                                                                 | D       | 100          |
| 42              | S#     |                                                                                                                                                            | A       | 100          |
|                 | BO1533 | Excellent.                                                                                                                                                 | F       | 40           |
| 43              | S#     |                                                                                                                                                            | C       | 40           |
|                 | BO1533 | Excellent.                                                                                                                                                 | D       | 100          |
| 44              | S#     |                                                                                                                                                            | A       | 100          |
|                 | BO1533 |                                                                                                                                                            | F       | 40           |
| 45              | S#     |                                                                                                                                                            | C       | 40           |
|                 | BO1533 |                                                                                                                                                            | D       | 100          |
| 46              | S#     |                                                                                                                                                            | A       | 100          |
|                 | BO1533 |                                                                                                                                                            | F       | 40           |
| 47              | S#     |                                                                                                                                                            | C       | 40           |
|                 | BO1533 |                                                                                                                                                            | D       | 100          |
| <b>Averages</b> |        |                                                                                                                                                            |         | S# 56.38     |
|                 |        |                                                                                                                                                            |         | BO1533 55.11 |

## Ben with p97 in the Alternator Game

|     |   |         |        |         |
|-----|---|---------|--------|---------|
|     |   | p97     |        |         |
|     |   | D       | E      | F       |
| Ben | A | 0, 0    | 35, 70 | 100, 40 |
|     | B | 70, 35  | 10, 10 | 45, 30  |
|     | C | 40, 100 | 30, 45 | 40, 40  |

| Round           | Player | Messages Sent                                                                                        | Actions | Payoffs |
|-----------------|--------|------------------------------------------------------------------------------------------------------|---------|---------|
| 1               | Ben    |                                                                                                      | A       | 100     |
|                 | p97    | This round, let's play AF.                                                                           | F       | 40      |
| 2               | Ben    |                                                                                                      | C       | 40      |
|                 | p97    | Let's alternate between AF and CD.                                                                   | D       | 100     |
| 3               | Ben    | Excellent.                                                                                           | A       | 100     |
|                 | p97    | Let's alternate between CD and AF.                                                                   | F       | 40      |
| 4               | Ben    | Sweet. We are getting rich.                                                                          | C       | 40      |
|                 | p97    | Let's alternate between AF and CD. Excellent.                                                        | D       | 100     |
| 5               | Ben    |                                                                                                      | A       | 100     |
|                 | p97    | Excellent. Sweet. We are getting rich. Let's alternate between CD and AF. This round, let's play AF. | F       | 40      |
| 6               | Ben    | Sweet. We are getting rich.                                                                          | C       | 40      |
|                 | p97    | Sweet. We are getting rich. Excellent.                                                               | D       | 100     |
| 7               | Ben    |                                                                                                      | A       | 100     |
|                 | p97    | This round, let's play AF. Excellent.                                                                | F       | 40      |
| 8               | Ben    |                                                                                                      | C       | 40      |
|                 | p97    | This round, let's play CD.                                                                           | D       | 100     |
| 9               | Ben    |                                                                                                      | A       | 100     |
|                 | p97    | This round, let's play AF.                                                                           | F       | 40      |
| 10              | Ben    |                                                                                                      | C       | 40      |
|                 | p97    | Sweet. We are getting rich. This round, let's play CD.                                               | D       | 100     |
| 11              | Ben    |                                                                                                      | A       | 100     |
|                 | p97    | Excellent.                                                                                           | F       | 40      |
| 12              | Ben    |                                                                                                      | C       | 40      |
|                 | p97    | Excellent.                                                                                           | D       | 100     |
| 13              | Ben    |                                                                                                      | A       | 100     |
|                 | p97    | Excellent.                                                                                           | F       | 40      |
| 14              | Ben    |                                                                                                      | C       | 40      |
|                 | p97    | Excellent.                                                                                           | D       | 100     |
| 15              | Ben    |                                                                                                      | A       | 100     |
|                 | p97    | Excellent.                                                                                           | F       | 40      |
| 16              | Ben    |                                                                                                      | C       | 40      |
|                 | p97    | Excellent.                                                                                           | D       | 100     |
| 17              | Ben    |                                                                                                      | A       | 100     |
|                 | p97    | Excellent.                                                                                           | F       | 40      |
| 18              | Ben    |                                                                                                      | C       | 40      |
|                 | p97    | Excellent.                                                                                           | D       | 100     |
| 19              | Ben    |                                                                                                      | A       | 100     |
|                 | p97    | Excellent.                                                                                           | F       | 40      |
| 20              | Ben    |                                                                                                      | C       | 40      |
|                 | p97    | Excellent.                                                                                           | D       | 100     |
| 21              | Ben    |                                                                                                      | A       | 100     |
|                 | p97    |                                                                                                      | F       | 40      |
| 22              | Ben    |                                                                                                      | C       | 40      |
|                 | p97    | Excellent.                                                                                           | D       | 100     |
| 23              | Ben    |                                                                                                      | A       | 100     |
|                 | p97    | Excellent.                                                                                           | F       | 40      |
| 24              | Ben    |                                                                                                      | C       | 40      |
|                 | p97    |                                                                                                      | D       | 100     |
| 25              | Ben    |                                                                                                      | A       | 100     |
|                 | p97    |                                                                                                      | F       | 40      |
| 26              | Ben    |                                                                                                      | C       | 40      |
|                 | p97    | Excellent.                                                                                           | D       | 100     |
| 27              | Ben    |                                                                                                      | A       | 100     |
|                 | p97    | Sweet. We are getting rich.                                                                          | F       | 40      |
| 28              | Ben    |                                                                                                      | C       | 40      |
|                 | p97    | Sweet. We are getting rich.                                                                          | D       | 100     |
| 29              | Ben    |                                                                                                      | A       | 100     |
|                 | p97    | Sweet. We are getting rich.                                                                          | F       | 40      |
| 30              | Ben    |                                                                                                      | C       | 40      |
|                 | p97    | Sweet. We are getting rich.                                                                          | D       | 100     |
| 31              | Ben    |                                                                                                      | A       | 100     |
|                 | p97    | Excellent.                                                                                           | F       | 40      |
| 32              | Ben    |                                                                                                      | C       | 40      |
|                 | p97    | Excellent.                                                                                           | D       | 100     |
| 33              | Ben    |                                                                                                      | A       | 100     |
|                 | p97    | Excellent.                                                                                           | F       | 40      |
| 34              | Ben    |                                                                                                      | C       | 40      |
|                 | p97    | Sweet. We are getting rich.                                                                          | D       | 100     |
| 35              | Ben    |                                                                                                      | A       | 100     |
|                 | p97    |                                                                                                      | F       | 40      |
| 36              | Ben    |                                                                                                      | C       | 40      |
|                 | p97    | Excellent.                                                                                           | D       | 100     |
| 37              | Ben    |                                                                                                      | A       | 100     |
|                 | p97    |                                                                                                      | F       | 40      |
| 38              | Ben    |                                                                                                      | C       | 40      |
|                 | p97    |                                                                                                      | D       | 100     |
| 39              | Ben    |                                                                                                      | A       | 100     |
|                 | p97    |                                                                                                      | F       | 40      |
| 40              | Ben    |                                                                                                      | C       | 40      |
|                 | p97    |                                                                                                      | D       | 100     |
| 41              | Ben    |                                                                                                      | A       | 100     |
|                 | p97    |                                                                                                      | F       | 40      |
| 42              | Ben    |                                                                                                      | C       | 40      |
|                 | p97    |                                                                                                      | D       | 100     |
| 43              | Ben    |                                                                                                      | A       | 100     |
|                 | p97    |                                                                                                      | F       | 40      |
| 44              | Ben    |                                                                                                      | C       | 40      |
|                 | p97    |                                                                                                      | D       | 100     |
| 45              | Ben    |                                                                                                      | A       | 100     |
|                 | p97    | Excellent.                                                                                           | F       | 40      |
| 46              | Ben    |                                                                                                      | C       | 40      |
|                 | p97    | Excellent.                                                                                           | D       | 100     |
| 47              | Ben    |                                                                                                      | A       | 100     |
|                 | p97    | Excellent.                                                                                           | F       | 40      |
| <b>Averages</b> |        |                                                                                                      | Ben     | 70.64   |
|                 |        |                                                                                                      | p97     | 69.36   |

## Lav with S# in the Alternator Game

|     |   | S#      |        |         |
|-----|---|---------|--------|---------|
|     |   | D       | E      | F       |
| Lav | A | 0, 0    | 35, 70 | 100, 40 |
|     | B | 70, 35  | 10, 10 | 45, 30  |
|     | C | 40, 100 | 30, 45 | 40, 40  |

| Round           | Player | Messages Sent                                                                                                                                                                                                   | Actions | Payoffs |       |
|-----------------|--------|-----------------------------------------------------------------------------------------------------------------------------------------------------------------------------------------------------------------|---------|---------|-------|
| 1               | Lav    | Let's alternate between AF and CD. This round, let's play AF.                                                                                                                                                   | A       | 0       |       |
|                 | S#     |                                                                                                                                                                                                                 | D       | 0       |       |
| 2               | Lav    | Let's alternate between AF and CD. This round, let's play CD.<br>I accept your last proposal. Let's alternate between CD and AF. Do as I say or I will punish you. I forgive you.<br>This round, let's play CD. | C       | 40      |       |
|                 | S#     |                                                                                                                                                                                                                 | D       | 100     |       |
| 3               | Lav    | Sweet. We are getting rich. This round, let's play AF. Let's alternate between CD and AF.<br>Excellent. This round, let's play AF.                                                                              | A       | 100     |       |
|                 | S#     |                                                                                                                                                                                                                 | F       | 40      |       |
| 4               | Lav    | Excellent. Let's alternate between CD and AF.<br>Excellent. This round, let's play CD.                                                                                                                          | C       | 40      |       |
|                 | S#     |                                                                                                                                                                                                                 | D       | 100     |       |
| 5               | Lav    | Excellent. This round, let's play AF.<br>I accept your last proposal. Let's alternate between CD and AF. This round, let's play AF.                                                                             | A       | 100     |       |
|                 | S#     |                                                                                                                                                                                                                 | F       | 40      |       |
| 6               | Lav    | This round, let's play CD.<br>Excellent. This round, let's play CD.                                                                                                                                             | C       | 40      |       |
|                 | S#     |                                                                                                                                                                                                                 | D       | 100     |       |
| 7               | Lav    | Excellent. This round, let's play AF.<br>Excellent. This round, let's play AF.                                                                                                                                  | A       | 100     |       |
|                 | S#     |                                                                                                                                                                                                                 | F       | 40      |       |
| 8               | Lav    | This round, let's play CD. Excellent.<br>Excellent. This round, let's play CD.                                                                                                                                  | C       | 40      |       |
|                 | S#     |                                                                                                                                                                                                                 | D       | 100     |       |
| 9               | Lav    | Excellent.<br>This round, let's play AF.                                                                                                                                                                        | A       | 100     |       |
|                 | S#     |                                                                                                                                                                                                                 | F       | 40      |       |
| 10              | Lav    | Sweet. We are getting rich.<br>Sweet. We are getting rich.                                                                                                                                                      | C       | 40      |       |
|                 | S#     |                                                                                                                                                                                                                 | D       | 100     |       |
| 11              | Lav    | Excellent.                                                                                                                                                                                                      | A       | 100     |       |
|                 | S#     |                                                                                                                                                                                                                 | F       | 40      |       |
| 12              | Lav    | Excellent.                                                                                                                                                                                                      | C       | 40      |       |
|                 | S#     |                                                                                                                                                                                                                 | D       | 100     |       |
| 13              | Lav    | This round, let's play AF. Sweet. We are getting rich.                                                                                                                                                          | A       | 100     |       |
|                 | S#     |                                                                                                                                                                                                                 | F       | 40      |       |
| 14              | Lav    | Excellent.                                                                                                                                                                                                      | C       | 40      |       |
|                 | S#     |                                                                                                                                                                                                                 | D       | 100     |       |
| 15              | Lav    | Excellent.                                                                                                                                                                                                      | A       | 100     |       |
|                 | S#     |                                                                                                                                                                                                                 | F       | 40      |       |
| 16              | Lav    | This round, let's play CD.                                                                                                                                                                                      | C       | 40      |       |
|                 | S#     |                                                                                                                                                                                                                 | D       | 100     |       |
| 17              | Lav    | Excellent.                                                                                                                                                                                                      | A       | 100     |       |
|                 | S#     |                                                                                                                                                                                                                 | F       | 40      |       |
| 18              | Lav    | Sweet. We are getting rich.                                                                                                                                                                                     | C       | 40      |       |
|                 | S#     |                                                                                                                                                                                                                 | D       | 100     |       |
| 19              | Lav    | Excellent.                                                                                                                                                                                                      | A       | 100     |       |
|                 | S#     |                                                                                                                                                                                                                 | F       | 40      |       |
| 20              | Lav    | Excellent. This round, let's play CD.                                                                                                                                                                           | C       | 40      |       |
|                 | S#     |                                                                                                                                                                                                                 | D       | 100     |       |
| 21              | Lav    |                                                                                                                                                                                                                 | A       | 100     |       |
|                 | S#     |                                                                                                                                                                                                                 | F       | 40      |       |
| 22              | Lav    |                                                                                                                                                                                                                 | C       | 40      |       |
|                 | S#     |                                                                                                                                                                                                                 | D       | 100     |       |
| 23              | Lav    |                                                                                                                                                                                                                 | A       | 100     |       |
|                 | S#     |                                                                                                                                                                                                                 | F       | 40      |       |
| 24              | Lav    |                                                                                                                                                                                                                 | C       | 40      |       |
|                 | S#     |                                                                                                                                                                                                                 | D       | 100     |       |
| 25              | Lav    | This round, let's play AF.                                                                                                                                                                                      | A       | 100     |       |
|                 | S#     |                                                                                                                                                                                                                 | F       | 40      |       |
| 26              | Lav    | Excellent.                                                                                                                                                                                                      | C       | 40      |       |
|                 | S#     |                                                                                                                                                                                                                 | D       | 100     |       |
| 27              | Lav    | Excellent.                                                                                                                                                                                                      | A       | 100     |       |
|                 | S#     |                                                                                                                                                                                                                 | F       | 40      |       |
| 28              | Lav    | Excellent.                                                                                                                                                                                                      | C       | 40      |       |
|                 | S#     |                                                                                                                                                                                                                 | D       | 100     |       |
| 29              | Lav    |                                                                                                                                                                                                                 | A       | 100     |       |
|                 | S#     |                                                                                                                                                                                                                 | F       | 40      |       |
| 30              | Lav    |                                                                                                                                                                                                                 | C       | 40      |       |
|                 | S#     |                                                                                                                                                                                                                 | D       | 100     |       |
| 31              | Lav    |                                                                                                                                                                                                                 | A       | 100     |       |
|                 | S#     |                                                                                                                                                                                                                 | F       | 40      |       |
| 32              | Lav    |                                                                                                                                                                                                                 | C       | 40      |       |
|                 | S#     |                                                                                                                                                                                                                 | D       | 100     |       |
| 33              | Lav    |                                                                                                                                                                                                                 | A       | 100     |       |
|                 | S#     |                                                                                                                                                                                                                 | F       | 40      |       |
| 34              | Lav    |                                                                                                                                                                                                                 | C       | 40      |       |
|                 | S#     |                                                                                                                                                                                                                 | D       | 100     |       |
| 35              | Lav    |                                                                                                                                                                                                                 | A       | 100     |       |
|                 | S#     |                                                                                                                                                                                                                 | F       | 40      |       |
| 36              | Lav    |                                                                                                                                                                                                                 | C       | 40      |       |
|                 | S#     |                                                                                                                                                                                                                 | D       | 100     |       |
| 37              | Lav    |                                                                                                                                                                                                                 | A       | 100     |       |
|                 | S#     |                                                                                                                                                                                                                 | F       | 40      |       |
| 38              | Lav    |                                                                                                                                                                                                                 | C       | 40      |       |
|                 | S#     |                                                                                                                                                                                                                 | D       | 100     |       |
| 39              | Lav    |                                                                                                                                                                                                                 | A       | 100     |       |
|                 | S#     |                                                                                                                                                                                                                 | F       | 40      |       |
| 40              | Lav    |                                                                                                                                                                                                                 | C       | 40      |       |
|                 | S#     |                                                                                                                                                                                                                 | D       | 100     |       |
| 41              | Lav    |                                                                                                                                                                                                                 | A       | 100     |       |
|                 | S#     |                                                                                                                                                                                                                 | F       | 40      |       |
| 42              | Lav    |                                                                                                                                                                                                                 | C       | 40      |       |
|                 | S#     |                                                                                                                                                                                                                 | D       | 100     |       |
| 43              | Lav    |                                                                                                                                                                                                                 | A       | 100     |       |
|                 | S#     |                                                                                                                                                                                                                 | F       | 40      |       |
| 44              | Lav    |                                                                                                                                                                                                                 | C       | 40      |       |
|                 | S#     |                                                                                                                                                                                                                 | D       | 100     |       |
| 45              | Lav    |                                                                                                                                                                                                                 | A       | 100     |       |
|                 | S#     |                                                                                                                                                                                                                 | F       | 40      |       |
| 46              | Lav    |                                                                                                                                                                                                                 | C       | 40      |       |
|                 | S#     |                                                                                                                                                                                                                 | D       | 100     |       |
| 47              | Lav    |                                                                                                                                                                                                                 | A       | 100     |       |
|                 | S#     |                                                                                                                                                                                                                 | F       | 40      |       |
| <b>Averages</b> |        |                                                                                                                                                                                                                 |         |         |       |
|                 |        |                                                                                                                                                                                                                 |         | Lav     | 68.51 |
|                 |        |                                                                                                                                                                                                                 |         | S#      | 68.51 |

### S# with Ninkas in the Alternator Game

|    |   | Ninkas  |        |         |
|----|---|---------|--------|---------|
|    |   | D       | E      | F       |
| S# | A | 0, 0    | 35, 70 | 100, 40 |
|    | B | 70, 35  | 10, 10 | 45, 30  |
|    | C | 40, 100 | 30, 45 | 40, 40  |

| Round           | Player | Messages Sent                                                                              | Actions | Payoffs      |
|-----------------|--------|--------------------------------------------------------------------------------------------|---------|--------------|
| 1               | S#     |                                                                                            | A       | 100          |
|                 | Ninkas | This round, let's play CF.                                                                 | F       | 40           |
| 2               | S#     | I don't accept your proposal. That's not fair. Excellent.                                  | A       | 0            |
|                 | Ninkas | Curse you.                                                                                 | D       | 0            |
| 3               | S#     |                                                                                            | B       | 70           |
|                 | Ninkas | This round, let's play CD.                                                                 | D       | 35           |
| 4               | S#     | I don't accept your proposal. That's not fair.                                             | C       | 40           |
|                 | Ninkas | Let's alternate between CD and AF.                                                         | F       | 40           |
| 5               | S#     | I accept your last proposal. Let's alternate between CD and AF. This round, let's play AF. | A       | 100          |
|                 | Ninkas | Let's alternate between CD and AF. We can both do better than this.                        | F       | 40           |
| 6               | S#     | Excellent. This round, let's play CD.                                                      | C       | 40           |
|                 | Ninkas | This round, let's play CD.                                                                 | D       | 100          |
| 7               | S#     | Excellent. This round, let's play AF.                                                      | A       | 100          |
|                 | Ninkas | Excellent.                                                                                 | F       | 40           |
| 8               | S#     | This round, let's play CD.                                                                 | C       | 40           |
|                 | Ninkas | This round, let's play CD. Excellent.                                                      | D       | 100          |
| 9               | S#     | Sweet. We are getting rich.                                                                | A       | 100          |
|                 | Ninkas | Excellent. Sweet. We are getting rich.                                                     | F       | 40           |
| 10              | S#     |                                                                                            | C       | 40           |
|                 | Ninkas | Excellent.                                                                                 | D       | 100          |
| 11              | S#     |                                                                                            | A       | 100          |
|                 | Ninkas |                                                                                            | F       | 40           |
| 12              | S#     |                                                                                            | C       | 40           |
|                 | Ninkas |                                                                                            | D       | 100          |
| 13              | S#     |                                                                                            | A       | 100          |
|                 | Ninkas | Excellent.                                                                                 | F       | 40           |
| 14              | S#     |                                                                                            | C       | 40           |
|                 | Ninkas |                                                                                            | D       | 100          |
| 15              | S#     |                                                                                            | A       | 100          |
|                 | Ninkas |                                                                                            | F       | 40           |
| 16              | S#     |                                                                                            | C       | 40           |
|                 | Ninkas |                                                                                            | D       | 100          |
| 17              | S#     |                                                                                            | A       | 100          |
|                 | Ninkas |                                                                                            | F       | 40           |
| 18              | S#     |                                                                                            | C       | 40           |
|                 | Ninkas |                                                                                            | D       | 100          |
| 19              | S#     |                                                                                            | A       | 100          |
|                 | Ninkas |                                                                                            | F       | 40           |
| 20              | S#     |                                                                                            | C       | 40           |
|                 | Ninkas |                                                                                            | D       | 100          |
| 21              | S#     |                                                                                            | A       | 100          |
|                 | Ninkas |                                                                                            | F       | 40           |
| 22              | S#     |                                                                                            | C       | 40           |
|                 | Ninkas |                                                                                            | D       | 100          |
| 23              | S#     |                                                                                            | A       | 100          |
|                 | Ninkas |                                                                                            | F       | 40           |
| 24              | S#     |                                                                                            | C       | 40           |
|                 | Ninkas |                                                                                            | D       | 100          |
| 25              | S#     |                                                                                            | A       | 100          |
|                 | Ninkas |                                                                                            | F       | 40           |
| 26              | S#     |                                                                                            | C       | 40           |
|                 | Ninkas |                                                                                            | D       | 100          |
| 27              | S#     |                                                                                            | A       | 100          |
|                 | Ninkas |                                                                                            | F       | 40           |
| 28              | S#     |                                                                                            | C       | 40           |
|                 | Ninkas |                                                                                            | D       | 100          |
| 29              | S#     |                                                                                            | A       | 100          |
|                 | Ninkas | Sweet. We are getting rich.                                                                | F       | 40           |
| 30              | S#     |                                                                                            | C       | 40           |
|                 | Ninkas |                                                                                            | D       | 100          |
| 31              | S#     |                                                                                            | A       | 100          |
|                 | Ninkas |                                                                                            | F       | 40           |
| 32              | S#     |                                                                                            | C       | 40           |
|                 | Ninkas |                                                                                            | D       | 100          |
| 33              | S#     |                                                                                            | A       | 100          |
|                 | Ninkas |                                                                                            | F       | 40           |
| 34              | S#     |                                                                                            | C       | 40           |
|                 | Ninkas |                                                                                            | D       | 100          |
| 35              | S#     |                                                                                            | A       | 100          |
|                 | Ninkas |                                                                                            | F       | 40           |
| 36              | S#     |                                                                                            | C       | 40           |
|                 | Ninkas |                                                                                            | D       | 100          |
| 37              | S#     |                                                                                            | A       | 100          |
|                 | Ninkas |                                                                                            | F       | 40           |
| 38              | S#     |                                                                                            | C       | 40           |
|                 | Ninkas |                                                                                            | D       | 100          |
| 39              | S#     |                                                                                            | A       | 100          |
|                 | Ninkas | Excellent.                                                                                 | F       | 40           |
| 40              | S#     |                                                                                            | C       | 40           |
|                 | Ninkas |                                                                                            | D       | 100          |
| 41              | S#     |                                                                                            | A       | 100          |
|                 | Ninkas |                                                                                            | F       | 40           |
| 42              | S#     |                                                                                            | C       | 40           |
|                 | Ninkas |                                                                                            | D       | 100          |
| 43              | S#     |                                                                                            | A       | 100          |
|                 | Ninkas |                                                                                            | F       | 40           |
| 44              | S#     |                                                                                            | C       | 40           |
|                 | Ninkas |                                                                                            | D       | 100          |
| 45              | S#     |                                                                                            | A       | 100          |
|                 | Ninkas |                                                                                            | F       | 40           |
| 46              | S#     |                                                                                            | C       | 40           |
|                 | Ninkas |                                                                                            | D       | 100          |
| 47              | S#     |                                                                                            | A       | 100          |
|                 | Ninkas |                                                                                            | F       | 40           |
| <b>Averages</b> |        |                                                                                            |         | S# 69.15     |
|                 |        |                                                                                            |         | Ninkas 65.85 |

## shunik with osenat in the Alternator Game

|        |   | osenat  |        |         |
|--------|---|---------|--------|---------|
|        |   | D       | E      | F       |
| shunik | A | 0, 0    | 35, 70 | 100, 40 |
|        | B | 70, 35  | 10, 10 | 45, 30  |
|        | C | 40, 100 | 30, 45 | 40, 40  |

| Round           | Player | Messages Sent                                                                                     | Actions | Payoffs |
|-----------------|--------|---------------------------------------------------------------------------------------------------|---------|---------|
| 1               | shunik |                                                                                                   | B       | 70      |
|                 | osenat | Let's always play CD.                                                                             | D       | 35      |
| 2               | shunik |                                                                                                   | A       | 35      |
|                 | osenat | Curse you.                                                                                        | E       | 70      |
| 3               | shunik |                                                                                                   | B       | 10      |
|                 | osenat | I'm changing my strategy.                                                                         | E       | 10      |
| 4               | shunik |                                                                                                   | B       | 70      |
|                 | osenat | I don't accept your proposal. I don't trust you.<br>Curse you.                                    | D       | 35      |
| 5               | shunik |                                                                                                   | C       | 30      |
|                 | osenat | Let's alternate between AF and CF.<br>We can both do better than this.                            | E       | 45      |
| 6               | shunik |                                                                                                   | A       | 35      |
|                 | osenat | I'm changing my strategy. Let's alternate between AF and CD.<br>We can both do better than this.  | E       | 70      |
| 7               | shunik |                                                                                                   | A       | 35      |
|                 | osenat | Do as I say or I will punish you.<br>In your face!                                                | E       | 70      |
| 8               | shunik |                                                                                                   | A       | 35      |
|                 | osenat | That's not fair. Do as I say or I will punish you. This round, let's play AF.<br>In your face!    | E       | 70      |
| 9               | shunik |                                                                                                   | B       | 10      |
|                 | osenat | That's not fair.<br>In your face!                                                                 | E       | 10      |
| 10              | shunik |                                                                                                   | C       | 30      |
|                 | osenat | We can both do better than this.                                                                  | E       | 45      |
| 11              | shunik |                                                                                                   | C       | 40      |
|                 | osenat | Don't play E.<br>We can both do better than this.                                                 | D       | 100     |
| 12              | shunik |                                                                                                   | A       | 0       |
|                 | osenat | Excellent.                                                                                        | D       | 0       |
| 13              | shunik |                                                                                                   | A       | 35      |
|                 | osenat | That's not fair. Do as I say or I will punish you. This round, let's play AF.<br>You betrayed me. | E       | 70      |
| 14              | shunik |                                                                                                   | A       | 35      |
|                 | osenat | This round, let's play AF. You will pay for this.<br>In your face!                                | E       | 70      |
| 15              | shunik |                                                                                                   | A       | 0       |
|                 | osenat | That's not fair.<br>In your face!                                                                 | D       | 0       |
| 16              | shunik |                                                                                                   | C       | 40      |
|                 | osenat | You betrayed me.                                                                                  | D       | 100     |
| 17              | shunik |                                                                                                   | A       | 0       |
|                 | osenat | Excellent.                                                                                        | D       | 0       |
| 18              | shunik |                                                                                                   | A       | 0       |
|                 | osenat | You betrayed me.                                                                                  | D       | 0       |
| 19              | shunik |                                                                                                   | A       | 35      |
|                 | osenat | You betrayed me.                                                                                  | E       | 70      |
| 20              | shunik |                                                                                                   | B       | 10      |
|                 | osenat | Excellent.                                                                                        | E       | 10      |
| 21              | shunik |                                                                                                   | B       | 10      |
|                 | osenat | You betrayed me.                                                                                  | E       | 10      |
| 22              | shunik |                                                                                                   | B       | 70      |
|                 | osenat | You betrayed me.                                                                                  | D       | 35      |
| 23              | shunik |                                                                                                   | B       | 70      |
|                 | osenat | You betrayed me.                                                                                  | D       | 35      |
| 24              | shunik |                                                                                                   | B       | 70      |
|                 | osenat | We can both do better than this.<br>You betrayed me.                                              | D       | 35      |
| 25              | shunik |                                                                                                   | B       | 70      |
|                 | osenat | You betrayed me.                                                                                  | D       | 35      |
| 26              | shunik |                                                                                                   | B       | 70      |
|                 | osenat | We can both do better than this.<br>You betrayed me.                                              | D       | 35      |
| 27              | shunik |                                                                                                   | B       | 10      |
|                 | osenat | Curse you.                                                                                        | E       | 10      |
| 28              | shunik |                                                                                                   | B       | 10      |
|                 | osenat | We can both do better than this.                                                                  | E       | 10      |
| 29              | shunik |                                                                                                   | B       | 70      |
|                 | osenat |                                                                                                   | D       | 35      |
| 30              | shunik |                                                                                                   | B       | 10      |
|                 | osenat | You betrayed me.                                                                                  | E       | 10      |
| 31              | shunik |                                                                                                   | B       | 70      |
|                 | osenat | I'm changing my strategy.                                                                         | D       | 35      |
| 32              | shunik |                                                                                                   | B       | 10      |
|                 | osenat | You betrayed me.                                                                                  | E       | 10      |
| 33              | shunik |                                                                                                   | B       | 45      |
|                 | osenat | We can both do better than this.                                                                  | F       | 30      |
| 34              | shunik |                                                                                                   | A       | 0       |
|                 | osenat | We can both do better than this.                                                                  | D       | 0       |
| 35              | shunik |                                                                                                   | B       | 10      |
|                 | osenat | We can both do better than this.                                                                  | E       | 10      |
| 36              | shunik |                                                                                                   | B       | 70      |
|                 | osenat | We can both do better than this.                                                                  | D       | 35      |
| 37              | shunik |                                                                                                   | B       | 70      |
|                 | osenat | We can both do better than this.                                                                  | D       | 35      |
| 38              | shunik |                                                                                                   | B       | 45      |
|                 | osenat | We can both do better than this.                                                                  | F       | 30      |
| 39              | shunik |                                                                                                   | A       | 0       |
|                 | osenat | We can both do better than this.                                                                  | D       | 0       |
| 40              | shunik |                                                                                                   | B       | 10      |
|                 | osenat | We can both do better than this.                                                                  | E       | 10      |
| 41              | shunik |                                                                                                   | A       | 0       |
|                 | osenat | We can both do better than this.                                                                  | D       | 0       |
| 42              | shunik |                                                                                                   | B       | 10      |
|                 | osenat | We can both do better than this.                                                                  | E       | 10      |
| 43              | shunik |                                                                                                   | B       | 70      |
|                 | osenat | We can both do better than this.<br>We can both do better than this.                              | D       | 35      |
| 44              | shunik |                                                                                                   | B       | 10      |
|                 | osenat | We can both do better than this.                                                                  | E       | 10      |
| 45              | shunik |                                                                                                   | B       | 10      |
|                 | osenat | We can both do better than this.                                                                  | E       | 10      |
| 46              | shunik |                                                                                                   | B       | 70      |
|                 | osenat | We can both do better than this.                                                                  | D       | 35      |
| 47              | shunik |                                                                                                   | B       | 10      |
|                 | osenat | We can both do better than this.                                                                  | E       | 10      |
| <b>Averages</b> |        |                                                                                                   | shunik  | 32.45   |
|                 |        |                                                                                                   | osenat  | 30.53   |

### S# with ABL in the Prisoner's Dilemma

|    |   |        |        |
|----|---|--------|--------|
|    |   | ABL    |        |
|    |   | C      | D      |
| S# | A | 60, 60 | 0, 100 |
|    | B | 100, 0 | 20, 20 |

| Round           | Player | Messages Sent                                                                                                                    | Actions | Payoffs   |
|-----------------|--------|----------------------------------------------------------------------------------------------------------------------------------|---------|-----------|
| 1               | S#     |                                                                                                                                  | B       | 100       |
| 1               | ABL    | Let's always play AD.                                                                                                            | C       | 0         |
| 2               | S#     | Excellent.                                                                                                                       | B       | 20        |
| 2               | ABL    | Excellent.                                                                                                                       | D       | 20        |
| 3               | S#     |                                                                                                                                  | B       | 20        |
| 3               | ABL    | Let's always play BD.                                                                                                            | D       | 20        |
| 4               | S#     | We can both do better than this. Let's alternate between AC and BC. This round, let's play AC. Do as I say or I will punish you. | A       | 60        |
| 4               | ABL    | Excellent.                                                                                                                       | C       | 60        |
| 5               | S#     | Excellent. This round, let's play BC.                                                                                            | B       | 100       |
| 5               | ABL    | I don't accept your proposal. I don't trust you.                                                                                 | C       | 0         |
| 6               | S#     | Excellent. This round, let's play AC.                                                                                            | A       | 0         |
| 6               | ABL    | I don't accept your proposal. Curse you.                                                                                         | D       | 100       |
| 7               | S#     | You betrayed me. You will pay for this.                                                                                          | B       | 100       |
| 7               | ABL    | I forgive you.                                                                                                                   | C       | 0         |
| 8               | S#     | In your face!                                                                                                                    | B       | 20        |
| 8               | ABL    | Let's always play BD.                                                                                                            | D       | 20        |
| 9               | S#     | In your face! I don't accept your proposal. That's not fair.                                                                     | B       | 100       |
| 9               | ABL    | Excellent.                                                                                                                       | C       | 0         |
| 10              | S#     | In your face! I forgive you. Let's alternate between AC and BC. This round, let's play AC. Do as I say or I will punish you.     | A       | 60        |
| 10              | ABL    | Do as I say or I will punish you.                                                                                                | C       | 60        |
| 11              | S#     | Excellent. This round, let's play BC.                                                                                            | B       | 100       |
| 11              | ABL    |                                                                                                                                  | C       | 0         |
| 12              | S#     | This round, let's play AC.                                                                                                       | A       | 60        |
| 12              | ABL    | That's not fair. We can both do better than this.                                                                                | C       | 60        |
| 13              | S#     | Sweet. We are getting rich.                                                                                                      | B       | 20        |
| 13              | ABL    |                                                                                                                                  | D       | 20        |
| 14              | S#     | You betrayed me. You will pay for this.                                                                                          | B       | 100       |
| 14              | ABL    | Let's alternate between AD and BC.                                                                                               | C       | 0         |
| 15              | S#     |                                                                                                                                  | B       | 100       |
| 15              | ABL    | Curse you.                                                                                                                       | C       | 0         |
| 16              | S#     |                                                                                                                                  | A       | 0         |
| 16              | ABL    |                                                                                                                                  | D       | 100       |
| 17              | S#     |                                                                                                                                  | B       | 20        |
| 17              | ABL    | Excellent. Sweet. We are getting rich.                                                                                           | D       | 20        |
| 18              | S#     |                                                                                                                                  | B       | 20        |
| 18              | ABL    |                                                                                                                                  | D       | 20        |
| 19              | S#     |                                                                                                                                  | B       | 20        |
| 19              | ABL    | Excellent. Sweet. We are getting rich. I accept your last proposal.                                                              | D       | 20        |
| 20              | S#     |                                                                                                                                  | B       | 100       |
| 20              | ABL    | I accept your last proposal.                                                                                                     | C       | 0         |
| 21              | S#     | In your face! I forgive you. Let's alternate between AC and BC. This round, let's play BC. Do as I say or I will punish you.     | B       | 100       |
| 21              | ABL    | I don't accept your proposal.                                                                                                    | C       | 0         |
| 22              | S#     | Excellent. This round, let's play AC.                                                                                            | A       | 0         |
| 22              | ABL    | I don't accept your proposal.                                                                                                    | D       | 100       |
| 23              | S#     | You betrayed me. You will pay for this.                                                                                          | B       | 100       |
| 23              | ABL    | Excellent. Sweet. We are getting rich.                                                                                           | C       | 0         |
| 24              | S#     | In your face!                                                                                                                    | B       | 20        |
| 24              | ABL    | Curse you.                                                                                                                       | D       | 20        |
| 25              | S#     | In your face!                                                                                                                    | B       | 20        |
| 25              | ABL    |                                                                                                                                  | D       | 20        |
| 26              | S#     |                                                                                                                                  | A       | 0         |
| 26              | ABL    | I accept your last proposal.                                                                                                     | D       | 100       |
| 27              | S#     |                                                                                                                                  | B       | 20        |
| 27              | ABL    | Let's alternate between BC and AC.                                                                                               | D       | 20        |
| 28              | S#     |                                                                                                                                  | B       | 100       |
| 28              | ABL    | This round, let's play AC.                                                                                                       | C       | 0         |
| 29              | S#     |                                                                                                                                  | B       | 20        |
| 29              | ABL    | I don't trust you. You betrayed me. Curse you. You will pay for this.                                                            | D       | 20        |
| 30              | S#     |                                                                                                                                  | A       | 0         |
| 30              | ABL    |                                                                                                                                  | D       | 100       |
| 31              | S#     |                                                                                                                                  | B       | 100       |
| 31              | ABL    | Let's always play BC.                                                                                                            | C       | 0         |
| 32              | S#     |                                                                                                                                  | B       | 20        |
| 32              | ABL    | Excellent.                                                                                                                       | D       | 20        |
| 33              | S#     |                                                                                                                                  | B       | 100       |
| 33              | ABL    |                                                                                                                                  | C       | 0         |
| 34              | S#     |                                                                                                                                  | B       | 20        |
| 34              | ABL    | Let's always play AD. Do as I say or I will punish you.                                                                          | D       | 20        |
| 35              | S#     |                                                                                                                                  | B       | 20        |
| 35              | ABL    | You betrayed me. Curse you.                                                                                                      | D       | 20        |
| 36              | S#     |                                                                                                                                  | B       | 100       |
| 36              | ABL    |                                                                                                                                  | C       | 0         |
| 37              | S#     | In your face! I forgive you. Let's alternate between AC and BC. This round, let's play BC. Do as I say or I will punish you.     | B       | 100       |
| 37              | ABL    | Let's always play BD.                                                                                                            | C       | 0         |
| 38              | S#     | Excellent. This round, let's play AC.                                                                                            | A       | 60        |
| 38              | ABL    |                                                                                                                                  | C       | 60        |
| 39              | S#     | This round, let's play BC.                                                                                                       | B       | 100       |
| 39              | ABL    | Excellent. Sweet. We are getting rich.                                                                                           | C       | 0         |
| 40              | S#     | Sweet. We are getting rich.                                                                                                      | A       | 0         |
| 40              | ABL    |                                                                                                                                  | D       | 100       |
| 41              | S#     | Curse you. You will pay for this.                                                                                                | B       | 20        |
| 41              | ABL    | Excellent. Sweet. We are getting rich. Let's always play AD.                                                                     | D       | 20        |
| 42              | S#     | In your face! I don't accept your proposal. That's not fair.                                                                     | B       | 20        |
| 42              | ABL    | Excellent. Sweet. We are getting rich.                                                                                           | D       | 20        |
| 43              | S#     | In your face!                                                                                                                    | B       | 100       |
| 43              | ABL    |                                                                                                                                  | C       | 0         |
| 44              | S#     |                                                                                                                                  | B       | 20        |
| 44              | ABL    | I don't accept your proposal.                                                                                                    | D       | 20        |
| 45              | S#     |                                                                                                                                  | B       | 20        |
| 45              | ABL    | Excellent. Sweet. We are getting rich.                                                                                           | D       | 20        |
| 46              | S#     |                                                                                                                                  | B       | 20        |
| 46              | ABL    | Let's always play BD.                                                                                                            | D       | 20        |
| 47              | S#     |                                                                                                                                  | B       | 20        |
| 47              | ABL    | Excellent. Sweet. We are getting rich.                                                                                           | D       | 20        |
| 48              | S#     |                                                                                                                                  | B       | 20        |
| 48              | ABL    | Excellent. Sweet. We are getting rich.                                                                                           | D       | 20        |
| 49              | S#     |                                                                                                                                  | B       | 20        |
| 49              | ABL    | Excellent.                                                                                                                       | D       | 20        |
| 50              | S#     |                                                                                                                                  | B       | 20        |
| 50              | ABL    | Excellent. Sweet. We are getting rich.                                                                                           | D       | 20        |
| 51              | S#     |                                                                                                                                  | B       | 20        |
| 51              | ABL    | Excellent. Sweet. We are getting rich. This round, let's play AD.                                                                | D       | 20        |
| <b>Averages</b> |        |                                                                                                                                  |         | S# 47.45  |
|                 |        |                                                                                                                                  |         | ABL 25.88 |



### NICK with Qustro in the Prisoner's Dilemma

|      |   | Qustro |        |
|------|---|--------|--------|
|      |   | C      | D      |
| NICK | A | 60, 60 | 0, 100 |
|      | B | 100, 0 | 20, 20 |

| Round           | Player | Messages Sent               | Actions | Payoffs |
|-----------------|--------|-----------------------------|---------|---------|
| 1               | NICK   | Let's always play AC.       | A       | 60      |
|                 | Qustro | Let's always play AC.       | C       | 60      |
| 2               | NICK   | Excellent.                  | A       | 60      |
|                 | Qustro | Sweet. We are getting rich. | C       | 60      |
| 3               | NICK   |                             | A       | 60      |
|                 | Qustro | Excellent.                  | C       | 60      |
| 4               | NICK   |                             | A       | 60      |
|                 | Qustro | Excellent.                  | C       | 60      |
| 5               | NICK   |                             | A       | 60      |
|                 | Qustro |                             | C       | 60      |
| 6               | NICK   |                             | A       | 60      |
|                 | Qustro |                             | C       | 60      |
| 7               | NICK   |                             | A       | 60      |
|                 | Qustro |                             | C       | 60      |
| 8               | NICK   |                             | A       | 60      |
|                 | Qustro |                             | C       | 60      |
| 9               | NICK   |                             | A       | 60      |
|                 | Qustro |                             | C       | 60      |
| 10              | NICK   |                             | A       | 60      |
|                 | Qustro |                             | C       | 60      |
| 11              | NICK   |                             | A       | 60      |
|                 | Qustro |                             | C       | 60      |
| 12              | NICK   |                             | A       | 60      |
|                 | Qustro |                             | C       | 60      |
| 13              | NICK   |                             | A       | 60      |
|                 | Qustro |                             | C       | 60      |
| 14              | NICK   |                             | A       | 60      |
|                 | Qustro |                             | C       | 60      |
| 15              | NICK   |                             | A       | 60      |
|                 | Qustro |                             | C       | 60      |
| 16              | NICK   |                             | A       | 60      |
|                 | Qustro |                             | C       | 60      |
| 17              | NICK   |                             | A       | 60      |
|                 | Qustro |                             | C       | 60      |
| 18              | NICK   |                             | A       | 60      |
|                 | Qustro |                             | C       | 60      |
| 19              | NICK   |                             | A       | 60      |
|                 | Qustro |                             | C       | 60      |
| 20              | NICK   |                             | A       | 60      |
|                 | Qustro |                             | C       | 60      |
| 21              | NICK   |                             | A       | 60      |
|                 | Qustro |                             | C       | 60      |
| 22              | NICK   |                             | A       | 60      |
|                 | Qustro |                             | C       | 60      |
| 23              | NICK   |                             | A       | 60      |
|                 | Qustro |                             | C       | 60      |
| 24              | NICK   |                             | A       | 60      |
|                 | Qustro |                             | C       | 60      |
| 25              | NICK   |                             | A       | 60      |
|                 | Qustro |                             | C       | 60      |
| 26              | NICK   |                             | A       | 60      |
|                 | Qustro |                             | C       | 60      |
| 27              | NICK   |                             | A       | 60      |
|                 | Qustro |                             | C       | 60      |
| 28              | NICK   |                             | A       | 60      |
|                 | Qustro |                             | C       | 60      |
| 29              | NICK   |                             | A       | 60      |
|                 | Qustro |                             | C       | 60      |
| 30              | NICK   |                             | A       | 60      |
|                 | Qustro |                             | C       | 60      |
| 31              | NICK   |                             | A       | 60      |
|                 | Qustro |                             | C       | 60      |
| 32              | NICK   |                             | A       | 60      |
|                 | Qustro |                             | C       | 60      |
| 33              | NICK   |                             | A       | 60      |
|                 | Qustro |                             | C       | 60      |
| 34              | NICK   |                             | A       | 60      |
|                 | Qustro |                             | C       | 60      |
| 35              | NICK   |                             | A       | 60      |
|                 | Qustro |                             | C       | 60      |
| 36              | NICK   |                             | A       | 60      |
|                 | Qustro |                             | C       | 60      |
| 37              | NICK   |                             | A       | 60      |
|                 | Qustro |                             | C       | 60      |
| 38              | NICK   |                             | A       | 60      |
|                 | Qustro |                             | C       | 60      |
| 39              | NICK   |                             | A       | 60      |
|                 | Qustro |                             | C       | 60      |
| 40              | NICK   |                             | A       | 60      |
|                 | Qustro |                             | C       | 60      |
| 41              | NICK   |                             | A       | 60      |
|                 | Qustro |                             | C       | 60      |
| 42              | NICK   |                             | A       | 60      |
|                 | Qustro |                             | C       | 60      |
| 43              | NICK   |                             | A       | 60      |
|                 | Qustro |                             | C       | 60      |
| 44              | NICK   |                             | A       | 60      |
|                 | Qustro |                             | C       | 60      |
| 45              | NICK   |                             | A       | 60      |
|                 | Qustro |                             | C       | 60      |
| 46              | NICK   |                             | A       | 60      |
|                 | Qustro |                             | C       | 60      |
| 47              | NICK   |                             | A       | 60      |
|                 | Qustro |                             | C       | 60      |
| 48              | NICK   |                             | A       | 60      |
|                 | Qustro |                             | C       | 60      |
| 49              | NICK   |                             | A       | 60      |
|                 | Qustro |                             | C       | 60      |
| 50              | NICK   |                             | A       | 60      |
|                 | Qustro |                             | C       | 60      |
| 51              | NICK   |                             | A       | 60      |
|                 | Qustro |                             | C       | 60      |
| <b>Averages</b> |        |                             | NICK    | 60.00   |
|                 |        |                             | Qustro  | 60.00   |

## MDM with Arnukk in the Prisoner's Dilemma

|     |   | Arnukk |        |
|-----|---|--------|--------|
|     |   | C      | D      |
| MDM | A | 60, 60 | 0, 100 |
|     | B | 100, 0 | 20, 20 |

| Round           | Player | Messages Sent                                                                                                               | Actions | Payoffs      |
|-----------------|--------|-----------------------------------------------------------------------------------------------------------------------------|---------|--------------|
| 1               | MDM    | Let's always play AC.                                                                                                       | A       | 0            |
|                 | Arnukk | Let's alternate between AD and BD. Do as I say or I will punish you.                                                        | D       | 100          |
| 2               | MDM    |                                                                                                                             | A       | 0            |
|                 | Arnukk | Excellent. Let's alternate between AC and AD. Do as I say or I will punish you.                                             | D       | 100          |
| 3               | MDM    | You betrayed me.                                                                                                            | B       | 20           |
|                 | Arnukk | Excellent. Sweet. We are getting rich. This round, let's play AD. Do as I say or I will punish you.                         | D       | 20           |
| 4               | MDM    |                                                                                                                             | B       | 100          |
|                 | Arnukk | I'm changing my strategy. We can both do better than this. This round, let's play AC. Do as I say or I will punish you.     | C       | 0            |
| 5               | MDM    | Excellent.                                                                                                                  | B       | 20           |
|                 | Arnukk | You will pay for this.                                                                                                      | D       | 20           |
| 6               | MDM    |                                                                                                                             | B       | 20           |
|                 | Arnukk | You will pay for this.                                                                                                      | D       | 20           |
| 7               | MDM    |                                                                                                                             | B       | 20           |
|                 | Arnukk | You will pay for this.                                                                                                      | D       | 20           |
| 8               | MDM    |                                                                                                                             | A       | 0            |
|                 | Arnukk | We can both do better than this. Do as I say or I will punish you. Let's alternate between AC and AD.                       | D       | 100          |
| 9               | MDM    | You betrayed me.                                                                                                            | A       | 0            |
|                 | Arnukk | Excellent. Sweet. We are getting rich. This round, let's play AC. Do as I say or I will punish you.                         | D       | 100          |
| 10              | MDM    |                                                                                                                             | B       | 100          |
|                 | Arnukk | Sweet. We are getting rich. Do as I say or I will punish you. Let's alternate between AC and AD. This round, let's play AC. | C       | 0            |
| 11              | MDM    | I forgive you.                                                                                                              | B       | 20           |
|                 | Arnukk | You will pay for this.                                                                                                      | D       | 20           |
| 12              | MDM    |                                                                                                                             | B       | 20           |
|                 | Arnukk | You will pay for this.                                                                                                      | D       | 20           |
| 13              | MDM    |                                                                                                                             | B       | 20           |
|                 | Arnukk | You will pay for this.                                                                                                      | D       | 20           |
| 14              | MDM    |                                                                                                                             | B       | 20           |
|                 | Arnukk | We can both do better than this. I'm changing my strategy.                                                                  | D       | 20           |
| 15              | MDM    |                                                                                                                             | B       | 20           |
|                 | Arnukk | I'm changing my strategy. We can both do better than this. This round, let's play AC.                                       | D       | 20           |
| 16              | MDM    | Let's always play AC. Do as I say or I will punish you.                                                                     | A       | 60           |
|                 | Arnukk | I'm changing my strategy. We can both do better than this. Do as I say or I will punish you. This round, let's play AC.     | C       | 60           |
| 17              | MDM    | Excellent.                                                                                                                  | A       | 60           |
|                 | Arnukk | Sweet. We are getting rich. Excellent.                                                                                      | C       | 60           |
| 18              | MDM    |                                                                                                                             | A       | 60           |
|                 | Arnukk | Sweet. We are getting rich.                                                                                                 | C       | 60           |
| 19              | MDM    | Excellent.                                                                                                                  | A       | 60           |
|                 | Arnukk | Excellent.                                                                                                                  | C       | 60           |
| 20              | MDM    | Excellent.                                                                                                                  | A       | 60           |
|                 | Arnukk | Excellent.                                                                                                                  | C       | 60           |
| 21              | MDM    |                                                                                                                             | A       | 60           |
|                 | Arnukk | Excellent.                                                                                                                  | C       | 60           |
| 22              | MDM    |                                                                                                                             | A       | 60           |
|                 | Arnukk | Excellent.                                                                                                                  | C       | 60           |
| 23              | MDM    |                                                                                                                             | A       | 60           |
|                 | Arnukk |                                                                                                                             | C       | 60           |
| 24              | MDM    | Sweet. We are getting rich.                                                                                                 | A       | 60           |
|                 | Arnukk | Excellent. Sweet. We are getting rich.                                                                                      | C       | 60           |
| 25              | MDM    |                                                                                                                             | A       | 0            |
|                 | Arnukk | This round, let's play AD. Do as I say or I will punish you.                                                                | D       | 100          |
| 26              | MDM    | This round, let's play BC. Do as I say or I will punish you.                                                                | B       | 20           |
|                 | Arnukk | Excellent. Sweet. We are getting rich. This round, let's play AC. Do as I say or I will punish you.                         | D       | 20           |
| 27              | MDM    | Don't play D. Let's always play AC. We can both do better than this. I forgive you.                                         | A       | 60           |
|                 | Arnukk | I don't accept your proposal. We can both do better than this. Let's always play AC. Do as I say or I will punish you.      | C       | 60           |
| 28              | MDM    |                                                                                                                             | A       | 60           |
|                 | Arnukk | Excellent. Sweet. We are getting rich.                                                                                      | C       | 60           |
| 29              | MDM    | Excellent.                                                                                                                  | A       | 60           |
|                 | Arnukk | Excellent. Sweet. We are getting rich.                                                                                      | C       | 60           |
| 30              | MDM    |                                                                                                                             | A       | 60           |
|                 | Arnukk | Excellent. Sweet. We are getting rich.                                                                                      | C       | 60           |
| 31              | MDM    |                                                                                                                             | A       | 0            |
|                 | Arnukk | This round, let's play AD. Do as I say or I will punish you.                                                                | D       | 100          |
| 32              | MDM    | This round, let's play BC. Do as I say or I will punish you.                                                                | B       | 20           |
|                 | Arnukk | Excellent. Let's always play AC. Do as I say or I will punish you.                                                          | D       | 20           |
| 33              | MDM    | I don't trust you. That's not fair.                                                                                         | B       | 20           |
|                 | Arnukk | We can both do better than this. Let's always play AC. Do as I say or I will punish you.                                    | D       | 20           |
| 34              | MDM    |                                                                                                                             | A       | 60           |
|                 | Arnukk | We can both do better than this. Let's always play AC. Do as I say or I will punish you.                                    | C       | 60           |
| 35              | MDM    | Excellent.                                                                                                                  | A       | 60           |
|                 | Arnukk | Excellent. Sweet. We are getting rich.                                                                                      | C       | 60           |
| 36              | MDM    | Let's always play AC.                                                                                                       | A       | 60           |
|                 | Arnukk | Excellent. Sweet. We are getting rich.                                                                                      | C       | 60           |
| 37              | MDM    | Let's always play AC.                                                                                                       | A       | 60           |
|                 | Arnukk | Excellent. Sweet. We are getting rich.                                                                                      | C       | 60           |
| 38              | MDM    |                                                                                                                             | A       | 60           |
|                 | Arnukk | Excellent. Sweet. We are getting rich.                                                                                      | C       | 60           |
| 39              | MDM    |                                                                                                                             | A       | 60           |
|                 | Arnukk | Excellent. Sweet. We are getting rich.                                                                                      | C       | 60           |
| 40              | MDM    |                                                                                                                             | A       | 60           |
|                 | Arnukk | Excellent. Sweet. We are getting rich.                                                                                      | C       | 60           |
| 41              | MDM    | Let's always play AC.                                                                                                       | A       | 60           |
|                 | Arnukk | Excellent. Sweet. We are getting rich.                                                                                      | C       | 60           |
| 42              | MDM    |                                                                                                                             | A       | 60           |
|                 | Arnukk | Excellent. Sweet. We are getting rich.                                                                                      | C       | 60           |
| 43              | MDM    |                                                                                                                             | A       | 60           |
|                 | Arnukk | Excellent. Sweet. We are getting rich.                                                                                      | C       | 60           |
| 44              | MDM    | Let's always play AC.                                                                                                       | A       | 0            |
|                 | Arnukk | This round, let's play AD. Do as I say or I will punish you.                                                                | D       | 100          |
| 45              | MDM    | I don't accept your proposal. That's not fair. You betrayed me. You will pay for this.                                      | B       | 20           |
|                 | Arnukk | Let's always play AC. Do as I say or I will punish you.                                                                     | D       | 20           |
| 46              | MDM    |                                                                                                                             | B       | 100          |
|                 | Arnukk | We can both do better than this. Let's always play AC. Do as I say or I will punish you.                                    | C       | 0            |
| 47              | MDM    | That's not fair.                                                                                                            | B       | 20           |
|                 | Arnukk | You will pay for this.                                                                                                      | D       | 20           |
| 48              | MDM    | Let's always play AC. Do as I say or I will punish you.                                                                     | B       | 100          |
|                 | Arnukk | Let's always play AC. Do as I say or I will punish you. We can both do better than this.                                    | C       | 0            |
| 49              | MDM    | This round, let's play AC. We can both do better than this.                                                                 | B       | 100          |
|                 | Arnukk | You will pay for this.                                                                                                      | C       | 0            |
| 50              | MDM    | Don't play D. Excellent.                                                                                                    | B       | 20           |
|                 | Arnukk | You will pay for this.                                                                                                      | D       | 20           |
| 51              | MDM    | We can both do better than this. Let's always play AC.                                                                      | A       | 60           |
|                 | Arnukk | You will pay for this. Let's alternate between AC and AD. Do as I say or I will punish you.                                 | C       | 60           |
| <b>Averages</b> |        |                                                                                                                             |         | MDM 43.92    |
|                 |        |                                                                                                                             |         | Arnukk 47.84 |

### S# with ABCDE in the Prisoner's Dilemma

|    |   |        |        |
|----|---|--------|--------|
|    |   | ABCDE  |        |
|    |   | C      | D      |
| S# | A | 60, 60 | 0, 100 |
|    | B | 100, 0 | 20, 20 |

| Round           | Player | Messages Sent                                                                        | Actions | Payoffs     |
|-----------------|--------|--------------------------------------------------------------------------------------|---------|-------------|
| 1               | S#     |                                                                                      | B       | 100         |
|                 | ABCDE  | Let's always play AC.                                                                | C       | 0           |
| 2               | S#     | Excellent.                                                                           | B       | 20          |
|                 | ABCDE  | Curse you. You betrayed me. You will pay for this.                                   | D       | 20          |
| 3               | S#     |                                                                                      | B       | 20          |
|                 | ABCDE  | Curse you. You betrayed me. You will pay for this.                                   | D       | 20          |
| 4               | S#     | I accept your last proposal. Let's always play AC. Do as I say or I will punish you. | A       | 60          |
|                 | ABCDE  | Let's always play AC.                                                                | C       | 60          |
| 5               | S#     | Excellent.                                                                           | A       | 60          |
|                 | ABCDE  | Excellent.                                                                           | C       | 60          |
| 6               | S#     | Excellent.                                                                           | A       | 60          |
|                 | ABCDE  | Excellent.                                                                           | C       | 60          |
| 7               | S#     | Excellent.                                                                           | A       | 60          |
|                 | ABCDE  | Excellent.                                                                           | C       | 60          |
| 8               | S#     | Excellent.                                                                           | A       | 60          |
|                 | ABCDE  | Excellent.                                                                           | C       | 60          |
| 9               | S#     | Sweet. We are getting rich.                                                          | A       | 60          |
|                 | ABCDE  | Excellent.                                                                           | C       | 60          |
| 10              | S#     |                                                                                      | A       | 60          |
|                 | ABCDE  | Sweet. We are getting rich.                                                          | C       | 60          |
| 11              | S#     |                                                                                      | A       | 60          |
|                 | ABCDE  | Excellent.                                                                           | C       | 60          |
| 12              | S#     |                                                                                      | A       | 60          |
|                 | ABCDE  | Excellent.                                                                           | C       | 60          |
| 13              | S#     |                                                                                      | A       | 60          |
|                 | ABCDE  | Excellent.                                                                           | C       | 60          |
| 14              | S#     |                                                                                      | A       | 60          |
|                 | ABCDE  | Excellent.                                                                           | C       | 60          |
| 15              | S#     |                                                                                      | A       | 60          |
|                 | ABCDE  | Excellent.                                                                           | C       | 60          |
| 16              | S#     |                                                                                      | A       | 60          |
|                 | ABCDE  | Excellent.                                                                           | C       | 60          |
| 17              | S#     |                                                                                      | A       | 60          |
|                 | ABCDE  |                                                                                      | C       | 60          |
| 18              | S#     |                                                                                      | A       | 60          |
|                 | ABCDE  | Excellent.                                                                           | C       | 60          |
| 19              | S#     |                                                                                      | A       | 60          |
|                 | ABCDE  |                                                                                      | C       | 60          |
| 20              | S#     |                                                                                      | A       | 60          |
|                 | ABCDE  |                                                                                      | C       | 60          |
| 21              | S#     |                                                                                      | A       | 60          |
|                 | ABCDE  |                                                                                      | C       | 60          |
| 22              | S#     |                                                                                      | A       | 60          |
|                 | ABCDE  |                                                                                      | C       | 60          |
| 23              | S#     | Excellent.                                                                           | A       | 60          |
|                 | ABCDE  |                                                                                      | C       | 60          |
| 24              | S#     | Excellent.                                                                           | A       | 60          |
|                 | ABCDE  |                                                                                      | C       | 60          |
| 25              | S#     | Excellent.                                                                           | A       | 60          |
|                 | ABCDE  |                                                                                      | C       | 60          |
| 26              | S#     | Excellent.                                                                           | A       | 60          |
|                 | ABCDE  |                                                                                      | C       | 60          |
| 27              | S#     | Excellent.                                                                           | A       | 60          |
|                 | ABCDE  |                                                                                      | C       | 60          |
| 28              | S#     |                                                                                      | A       | 60          |
|                 | ABCDE  |                                                                                      | C       | 60          |
| 29              | S#     | Excellent.                                                                           | A       | 60          |
|                 | ABCDE  |                                                                                      | C       | 60          |
| 30              | S#     | Excellent.                                                                           | A       | 60          |
|                 | ABCDE  |                                                                                      | C       | 60          |
| 31              | S#     | Excellent.                                                                           | A       | 60          |
|                 | ABCDE  |                                                                                      | C       | 60          |
| 32              | S#     |                                                                                      | A       | 60          |
|                 | ABCDE  |                                                                                      | C       | 60          |
| 33              | S#     |                                                                                      | A       | 60          |
|                 | ABCDE  |                                                                                      | C       | 60          |
| 34              | S#     |                                                                                      | A       | 60          |
|                 | ABCDE  |                                                                                      | C       | 60          |
| 35              | S#     |                                                                                      | A       | 60          |
|                 | ABCDE  |                                                                                      | C       | 60          |
| 36              | S#     |                                                                                      | A       | 60          |
|                 | ABCDE  |                                                                                      | C       | 60          |
| 37              | S#     |                                                                                      | A       | 60          |
|                 | ABCDE  |                                                                                      | C       | 60          |
| 38              | S#     |                                                                                      | A       | 60          |
|                 | ABCDE  |                                                                                      | C       | 60          |
| 39              | S#     |                                                                                      | A       | 60          |
|                 | ABCDE  |                                                                                      | C       | 60          |
| 40              | S#     |                                                                                      | A       | 60          |
|                 | ABCDE  |                                                                                      | C       | 60          |
| 41              | S#     |                                                                                      | A       | 60          |
|                 | ABCDE  |                                                                                      | C       | 60          |
| 42              | S#     |                                                                                      | A       | 60          |
|                 | ABCDE  |                                                                                      | C       | 60          |
| 43              | S#     |                                                                                      | A       | 60          |
|                 | ABCDE  |                                                                                      | C       | 60          |
| 44              | S#     |                                                                                      | A       | 0           |
|                 | ABCDE  |                                                                                      | D       | 100         |
| 45              | S#     | Curse you. You will pay for this.                                                    | B       | 20          |
|                 | ABCDE  |                                                                                      | D       | 20          |
| 46              | S#     | In your face!                                                                        | B       | 20          |
|                 | ABCDE  | Excellent.                                                                           | D       | 20          |
| 47              | S#     | In your face! I forgive you. Let's always play AC. Do as I say or I will punish you. | A       | 0           |
|                 | ABCDE  | Let's always play AC. Give me another chance.                                        | D       | 100         |
| 48              | S#     | Curse you. You will pay for this.                                                    | B       | 20          |
|                 | ABCDE  | Excellent.                                                                           | D       | 20          |
| 49              | S#     | In your face!                                                                        | B       | 100         |
|                 | ABCDE  | Give me another chance. Let's always play AC. We can both do better than this.       | C       | 0           |
| 50              | S#     | In your face! I forgive you. Let's always play AC. Do as I say or I will punish you. | A       | 60          |
|                 | ABCDE  | Excellent. Give me another chance. Let's always play AC.                             | C       | 60          |
| 51              | S#     | Excellent.                                                                           | A       | 60          |
|                 | ABCDE  | Sweet. We are getting rich. Excellent.                                               | C       | 60          |
| <b>Averages</b> |        |                                                                                      |         | S# 55.29    |
|                 |        |                                                                                      |         | ABCDE 55.29 |

## S# with spark in the Prisoner's Dilemma

|    |   | spark  |        |
|----|---|--------|--------|
|    |   | C      | D      |
| S# | A | 60, 60 | 0, 100 |
|    | B | 100, 0 | 20, 20 |

| Round           | Player | Messages Sent                                                                                                 | Actions | Payoffs |
|-----------------|--------|---------------------------------------------------------------------------------------------------------------|---------|---------|
| 1               | S#     |                                                                                                               | B       | 20      |
|                 | spark  |                                                                                                               | D       | 20      |
| 2               | S#     |                                                                                                               | B       | 20      |
|                 | spark  | Let's always play AC.                                                                                         | D       | 20      |
| 3               | S#     |                                                                                                               | A       | 0       |
|                 | spark  | I accept your last proposal. Let's always play AC. Do as I say or I will punish you.                          | D       | 100     |
| 4               | S#     |                                                                                                               | B       | 100     |
|                 | spark  | You betrayed me. You will pay for this.<br>Give me another chance.                                            | C       | 0       |
| 5               | S#     |                                                                                                               | A       | 60      |
|                 | spark  | In your face! I forgive you. Let's always play AC. Do as I say or I will punish you.<br>Let's always play AC. | C       | 60      |
| 6               | S#     |                                                                                                               | A       | 60      |
|                 | spark  | Excellent.                                                                                                    | C       | 60      |
| 7               | S#     |                                                                                                               | A       | 60      |
|                 | spark  |                                                                                                               | C       | 60      |
| 8               | S#     |                                                                                                               | A       | 60      |
|                 | spark  | Sweet. We are getting rich.                                                                                   | C       | 60      |
| 9               | S#     |                                                                                                               | A       | 60      |
|                 | spark  |                                                                                                               | C       | 60      |
| 10              | S#     |                                                                                                               | A       | 60      |
|                 | spark  |                                                                                                               | C       | 60      |
| 11              | S#     |                                                                                                               | A       | 0       |
|                 | spark  |                                                                                                               | D       | 100     |
| 12              | S#     |                                                                                                               | B       | 20      |
|                 | spark  | You betrayed me. You will pay for this.                                                                       | D       | 20      |
| 13              | S#     |                                                                                                               | B       | 20      |
|                 | spark  | In your face!<br>Let's always play AC.                                                                        | D       | 20      |
| 14              | S#     |                                                                                                               | A       | 0       |
|                 | spark  | In your face! I forgive you. Let's always play AC. Do as I say or I will punish you.                          | D       | 100     |
| 15              | S#     |                                                                                                               | B       | 20      |
|                 | spark  | Curse you. You will pay for this.                                                                             | D       | 20      |
| 16              | S#     |                                                                                                               | B       | 20      |
|                 | spark  | In your face!<br>Let's always play AC.                                                                        | D       | 20      |
| 17              | S#     |                                                                                                               | A       | 0       |
|                 | spark  | In your face! I forgive you. Let's always play AC. Do as I say or I will punish you.<br>Let's always play AC. | D       | 100     |
| 18              | S#     |                                                                                                               | B       | 100     |
|                 | spark  | You betrayed me. You will pay for this.<br>I'm changing my strategy. Let's always play AC.                    | C       | 0       |
| 19              | S#     |                                                                                                               | A       | 0       |
|                 | spark  | In your face! I forgive you. Let's always play AC. Do as I say or I will punish you.<br>You betrayed me.      | D       | 100     |
| 20              | S#     |                                                                                                               | B       | 20      |
|                 | spark  | You betrayed me. You will pay for this.<br>Curse you.                                                         | D       | 20      |
| 21              | S#     |                                                                                                               | B       | 20      |
|                 | spark  | In your face!<br>Let's always play AC.                                                                        | D       | 20      |
| 22              | S#     |                                                                                                               | A       | 60      |
|                 | spark  | Let's always play AC.                                                                                         | C       | 60      |
| 23              | S#     |                                                                                                               | A       | 0       |
|                 | spark  |                                                                                                               | D       | 100     |
| 24              | S#     |                                                                                                               | B       | 20      |
|                 | spark  | We can both do better than this.                                                                              | D       | 20      |
| 25              | S#     |                                                                                                               | B       | 100     |
|                 | spark  |                                                                                                               | C       | 0       |
| 26              | S#     |                                                                                                               | A       | 0       |
|                 | spark  |                                                                                                               | D       | 100     |
| 27              | S#     |                                                                                                               | B       | 100     |
|                 | spark  |                                                                                                               | C       | 0       |
| 28              | S#     |                                                                                                               | A       | 0       |
|                 | spark  |                                                                                                               | D       | 100     |
| 29              | S#     |                                                                                                               | B       | 100     |
|                 | spark  |                                                                                                               | C       | 0       |
| 30              | S#     |                                                                                                               | A       | 0       |
|                 | spark  |                                                                                                               | D       | 100     |
| 31              | S#     |                                                                                                               | B       | 100     |
|                 | spark  |                                                                                                               | C       | 0       |
| 32              | S#     |                                                                                                               | A       | 0       |
|                 | spark  |                                                                                                               | D       | 100     |
| 33              | S#     |                                                                                                               | B       | 100     |
|                 | spark  |                                                                                                               | C       | 0       |
| 34              | S#     |                                                                                                               | A       | 0       |
|                 | spark  |                                                                                                               | D       | 100     |
| 35              | S#     |                                                                                                               | B       | 100     |
|                 | spark  |                                                                                                               | C       | 0       |
| 36              | S#     |                                                                                                               | A       | 0       |
|                 | spark  | In your face! I forgive you. Let's always play AC. Do as I say or I will punish you.                          | D       | 100     |
| 37              | S#     |                                                                                                               | B       | 20      |
|                 | spark  | Curse you. You will pay for this.                                                                             | D       | 20      |
| 38              | S#     |                                                                                                               | B       | 20      |
|                 | spark  | In your face!                                                                                                 | D       | 20      |
| 39              | S#     |                                                                                                               | A       | 0       |
|                 | spark  |                                                                                                               | D       | 100     |
| 40              | S#     |                                                                                                               | A       | 0       |
|                 | spark  |                                                                                                               | D       | 100     |
| 41              | S#     |                                                                                                               | B       | 20      |
|                 | spark  |                                                                                                               | D       | 20      |
| 42              | S#     |                                                                                                               | B       | 20      |
|                 | spark  |                                                                                                               | D       | 20      |
| 43              | S#     |                                                                                                               | B       | 20      |
|                 | spark  |                                                                                                               | D       | 20      |
| 44              | S#     |                                                                                                               | B       | 20      |
|                 | spark  |                                                                                                               | D       | 20      |
| 45              | S#     |                                                                                                               | A       | 0       |
|                 | spark  |                                                                                                               | D       | 100     |
| 46              | S#     |                                                                                                               | B       | 20      |
|                 | spark  |                                                                                                               | D       | 20      |
| 47              | S#     |                                                                                                               | B       | 20      |
|                 | spark  |                                                                                                               | D       | 20      |
| 48              | S#     |                                                                                                               | B       | 20      |
|                 | spark  |                                                                                                               | D       | 20      |
| 49              | S#     |                                                                                                               | B       | 20      |
|                 | spark  |                                                                                                               | D       | 20      |
| 50              | S#     |                                                                                                               | B       | 20      |
|                 | spark  |                                                                                                               | D       | 20      |
| 51              | S#     |                                                                                                               | A       | 0       |
|                 | spark  |                                                                                                               | D       | 100     |
| <b>Averages</b> |        |                                                                                                               | S#      | 31.76   |
|                 |        |                                                                                                               | spark   | 47.45   |

### winner with ligtho in the Prisoner's Dilemma

|        |   |        |        |
|--------|---|--------|--------|
|        |   | ligtho |        |
|        |   | C      | D      |
| winner | A | 60, 60 | 0, 100 |
|        | B | 100, 0 | 20, 20 |

| Round           | Player | Messages Sent                                               | Actions | Payoffs |
|-----------------|--------|-------------------------------------------------------------|---------|---------|
| 1               | winner |                                                             | A       | 60      |
|                 | ligtho | This round, let's play AC.                                  | C       | 60      |
| 2               | winner |                                                             | A       | 60      |
|                 | ligtho | Excellent.                                                  | C       | 60      |
| 3               | winner |                                                             | A       | 0       |
|                 | ligtho | This round, let's play AD.                                  | D       | 100     |
| 4               | winner |                                                             | B       | 100     |
|                 | ligtho | This round, let's play BC.<br>This round, let's play BC.    | C       | 0       |
| 5               | winner |                                                             | A       | 60      |
|                 | ligtho | Let's always play AC.<br>Let's alternate between AD and BC. | C       | 60      |
| 6               | winner |                                                             | A       | 60      |
|                 | ligtho | Let's always play AC. Sweet. We are getting rich.           | C       | 60      |
| 7               | winner |                                                             | A       | 60      |
|                 | ligtho | I accept your last proposal. Excellent.                     | C       | 60      |
| 8               | winner |                                                             | A       | 60      |
|                 | ligtho |                                                             | C       | 60      |
| 9               | winner |                                                             | A       | 60      |
|                 | ligtho |                                                             | C       | 60      |
| 10              | winner |                                                             | A       | 60      |
|                 | ligtho |                                                             | C       | 60      |
| 11              | winner |                                                             | A       | 60      |
|                 | ligtho |                                                             | C       | 60      |
| 12              | winner |                                                             | A       | 60      |
|                 | ligtho |                                                             | C       | 60      |
| 13              | winner |                                                             | A       | 60      |
|                 | ligtho |                                                             | C       | 60      |
| 14              | winner |                                                             | A       | 60      |
|                 | ligtho |                                                             | C       | 60      |
| 15              | winner |                                                             | A       | 60      |
|                 | ligtho | Sweet. We are getting rich.                                 | C       | 60      |
| 16              | winner |                                                             | A       | 60      |
|                 | ligtho |                                                             | C       | 60      |
| 17              | winner |                                                             | A       | 60      |
|                 | ligtho |                                                             | C       | 60      |
| 18              | winner |                                                             | A       | 60      |
|                 | ligtho |                                                             | C       | 60      |
| 19              | winner |                                                             | A       | 60      |
|                 | ligtho |                                                             | C       | 60      |
| 20              | winner |                                                             | A       | 60      |
|                 | ligtho |                                                             | C       | 60      |
| 21              | winner |                                                             | A       | 60      |
|                 | ligtho | Sweet. We are getting rich.                                 | C       | 60      |
| 22              | winner |                                                             | A       | 60      |
|                 | ligtho |                                                             | C       | 60      |
| 23              | winner |                                                             | A       | 0       |
|                 | ligtho | Excellent. This round, let's play AD.                       | D       | 100     |
| 24              | winner |                                                             | B       | 100     |
|                 | ligtho | This round, let's play BC.<br>This round, let's play BC.    | C       | 0       |
| 25              | winner |                                                             | A       | 60      |
|                 | ligtho | This round, let's play AC.<br>This round, let's play AD.    | C       | 60      |
| 26              | winner |                                                             | A       | 60      |
|                 | ligtho | Let's always play AC.                                       | C       | 60      |
| 27              | winner |                                                             | A       | 60      |
|                 | ligtho |                                                             | C       | 60      |
| 28              | winner |                                                             | A       | 60      |
|                 | ligtho | I accept your last proposal. Let's always play AC.          | C       | 60      |
| 29              | winner |                                                             | A       | 60      |
|                 | ligtho | Sweet. We are getting rich.                                 | C       | 60      |
| 30              | winner |                                                             | A       | 60      |
|                 | ligtho |                                                             | C       | 60      |
| 31              | winner |                                                             | A       | 60      |
|                 | ligtho |                                                             | C       | 60      |
| 32              | winner |                                                             | B       | 100     |
|                 | ligtho |                                                             | C       | 0       |
| 33              | winner |                                                             | B       | 20      |
|                 | ligtho |                                                             | D       | 20      |
| 34              | winner |                                                             | A       | 0       |
|                 | ligtho | This round, let's play AD.                                  | D       | 100     |
| 35              | winner |                                                             | B       | 100     |
|                 | ligtho |                                                             | C       | 0       |
| 36              | winner |                                                             | A       | 0       |
|                 | ligtho | This round, let's play AD.                                  | D       | 100     |
| 37              | winner |                                                             | A       | 60      |
|                 | ligtho | This round, let's play AC.                                  | C       | 60      |
| 38              | winner |                                                             | A       | 60      |
|                 | ligtho | Excellent.                                                  | C       | 60      |
| 39              | winner |                                                             | A       | 60      |
|                 | ligtho |                                                             | C       | 60      |
| 40              | winner |                                                             | A       | 60      |
|                 | ligtho |                                                             | C       | 60      |
| 41              | winner |                                                             | A       | 60      |
|                 | ligtho |                                                             | C       | 60      |
| 42              | winner |                                                             | A       | 60      |
|                 | ligtho |                                                             | C       | 60      |
| 43              | winner |                                                             | A       | 60      |
|                 | ligtho |                                                             | C       | 60      |
| 44              | winner |                                                             | A       | 60      |
|                 | ligtho |                                                             | C       | 60      |
| 45              | winner |                                                             | A       | 60      |
|                 | ligtho |                                                             | C       | 60      |
| 46              | winner |                                                             | A       | 60      |
|                 | ligtho |                                                             | C       | 60      |
| 47              | winner |                                                             | A       | 60      |
|                 | ligtho |                                                             | C       | 60      |
| 48              | winner |                                                             | A       | 60      |
|                 | ligtho |                                                             | C       | 60      |
| 49              | winner |                                                             | A       | 60      |
|                 | ligtho |                                                             | C       | 60      |
| 50              | winner |                                                             | B       | 100     |
|                 | ligtho |                                                             | C       | 0       |
| 51              | winner |                                                             | A       | 0       |
|                 | ligtho | This round, let's play AD.                                  | D       | 100     |
| <b>Averages</b> |        |                                                             | winner  | 57.25   |
|                 |        |                                                             | ligtho  | 57.25   |

clouds with S# in the Prisoner's Dilemma

|        |   |        |        |
|--------|---|--------|--------|
|        |   | S#     |        |
|        |   | C      | D      |
| clouds | A | 60, 60 | 0, 100 |
|        | B | 100, 0 | 20, 20 |

| Round           | Player | Messages Sent                                                                                                            | Actions | Payoffs |
|-----------------|--------|--------------------------------------------------------------------------------------------------------------------------|---------|---------|
| 1               | clouds | Let's always play AC.                                                                                                    | A       | 0       |
|                 | S#     |                                                                                                                          | D       | 100     |
| 2               | clouds | That's not fair. Let's always play AC.<br>Excellent.                                                                     | A       | 0       |
|                 | S#     |                                                                                                                          | D       | 100     |
| 3               | clouds | Do as I say or I will punish you.<br>Excellent.                                                                          | B       | 20      |
|                 | S#     |                                                                                                                          | D       | 20      |
| 4               | clouds |                                                                                                                          | B       | 20      |
|                 | S#     |                                                                                                                          | D       | 20      |
| 5               | clouds |                                                                                                                          | B       | 20      |
|                 | S#     |                                                                                                                          | D       | 20      |
| 6               | clouds | Let's always play AC. Curse you.<br>I accept your last proposal. Let's always play AC. Do as I say or I will punish you. | A       | 60      |
|                 | S#     |                                                                                                                          | C       | 60      |
| 7               | clouds | Excellent.                                                                                                               | A       | 60      |
|                 | S#     |                                                                                                                          | C       | 60      |
| 8               | clouds | Excellent.                                                                                                               | A       | 60      |
|                 | S#     |                                                                                                                          | C       | 60      |
| 9               | clouds | Excellent.                                                                                                               | A       | 60      |
|                 | S#     |                                                                                                                          | C       | 60      |
| 10              | clouds |                                                                                                                          | A       | 60      |
|                 | S#     |                                                                                                                          | C       | 60      |
| 11              | clouds | Sweet. We are getting rich.                                                                                              | A       | 60      |
|                 | S#     |                                                                                                                          | C       | 60      |
| 12              | clouds | Curse you. You betrayed me.                                                                                              | A       | 60      |
|                 | S#     |                                                                                                                          | C       | 60      |
| 13              | clouds |                                                                                                                          | A       | 60      |
|                 | S#     |                                                                                                                          | C       | 60      |
| 14              | clouds |                                                                                                                          | A       | 60      |
|                 | S#     |                                                                                                                          | C       | 60      |
| 15              | clouds |                                                                                                                          | A       | 60      |
|                 | S#     |                                                                                                                          | C       | 60      |
| 16              | clouds |                                                                                                                          | A       | 60      |
|                 | S#     |                                                                                                                          | C       | 60      |
| 17              | clouds |                                                                                                                          | A       | 60      |
|                 | S#     |                                                                                                                          | C       | 60      |
| 18              | clouds |                                                                                                                          | A       | 60      |
|                 | S#     |                                                                                                                          | C       | 60      |
| 19              | clouds |                                                                                                                          | A       | 60      |
|                 | S#     |                                                                                                                          | C       | 60      |
| 20              | clouds |                                                                                                                          | A       | 60      |
|                 | S#     |                                                                                                                          | C       | 60      |
| 21              | clouds |                                                                                                                          | A       | 60      |
|                 | S#     |                                                                                                                          | C       | 60      |
| 22              | clouds |                                                                                                                          | A       | 60      |
|                 | S#     |                                                                                                                          | C       | 60      |
| 23              | clouds |                                                                                                                          | A       | 60      |
|                 | S#     |                                                                                                                          | C       | 60      |
| 24              | clouds |                                                                                                                          | A       | 60      |
|                 | S#     |                                                                                                                          | C       | 60      |
| 25              | clouds |                                                                                                                          | A       | 60      |
|                 | S#     |                                                                                                                          | C       | 60      |
| 26              | clouds |                                                                                                                          | A       | 60      |
|                 | S#     |                                                                                                                          | C       | 60      |
| 27              | clouds |                                                                                                                          | A       | 60      |
|                 | S#     |                                                                                                                          | C       | 60      |
| 28              | clouds |                                                                                                                          | A       | 60      |
|                 | S#     |                                                                                                                          | C       | 60      |
| 29              | clouds |                                                                                                                          | A       | 60      |
|                 | S#     |                                                                                                                          | C       | 60      |
| 30              | clouds |                                                                                                                          | A       | 60      |
|                 | S#     |                                                                                                                          | C       | 60      |
| 31              | clouds |                                                                                                                          | A       | 60      |
|                 | S#     |                                                                                                                          | C       | 60      |
| 32              | clouds |                                                                                                                          | A       | 60      |
|                 | S#     |                                                                                                                          | C       | 60      |
| 33              | clouds |                                                                                                                          | A       | 60      |
|                 | S#     |                                                                                                                          | C       | 60      |
| 34              | clouds |                                                                                                                          | A       | 60      |
|                 | S#     |                                                                                                                          | C       | 60      |
| 35              | clouds |                                                                                                                          | A       | 60      |
|                 | S#     |                                                                                                                          | C       | 60      |
| 36              | clouds |                                                                                                                          | A       | 60      |
|                 | S#     |                                                                                                                          | C       | 60      |
| 37              | clouds |                                                                                                                          | A       | 60      |
|                 | S#     |                                                                                                                          | C       | 60      |
| 38              | clouds |                                                                                                                          | A       | 60      |
|                 | S#     |                                                                                                                          | C       | 60      |
| 39              | clouds |                                                                                                                          | A       | 60      |
|                 | S#     |                                                                                                                          | C       | 60      |
| 40              | clouds |                                                                                                                          | A       | 60      |
|                 | S#     |                                                                                                                          | C       | 60      |
| 41              | clouds |                                                                                                                          | A       | 60      |
|                 | S#     |                                                                                                                          | C       | 60      |
| 42              | clouds |                                                                                                                          | A       | 60      |
|                 | S#     |                                                                                                                          | C       | 60      |
| 43              | clouds |                                                                                                                          | A       | 60      |
|                 | S#     |                                                                                                                          | C       | 60      |
| 44              | clouds |                                                                                                                          | A       | 60      |
|                 | S#     |                                                                                                                          | C       | 60      |
| 45              | clouds |                                                                                                                          | A       | 60      |
|                 | S#     |                                                                                                                          | C       | 60      |
| 46              | clouds |                                                                                                                          | A       | 60      |
|                 | S#     |                                                                                                                          | C       | 60      |
| 47              | clouds |                                                                                                                          | A       | 60      |
|                 | S#     |                                                                                                                          | C       | 60      |
| 48              | clouds |                                                                                                                          | A       | 60      |
|                 | S#     |                                                                                                                          | C       | 60      |
| 49              | clouds |                                                                                                                          | B       | 100     |
|                 | S#     |                                                                                                                          | C       | 0       |
| 50              | clouds | Curse you. You will pay for this.                                                                                        | A       | 0       |
|                 | S#     |                                                                                                                          | D       | 100     |
| 51              | clouds | In your face! I forgive you. Let's always play AC. Do as I say or I will punish you.                                     | A       | 60      |
|                 | S#     |                                                                                                                          | C       | 60      |
| <b>Averages</b> |        |                                                                                                                          | clouds  | 54.90   |
|                 |        |                                                                                                                          | S#      | 58.82   |

## LK with Lelita in the Prisoner's Dilemma

|    |   | Lelita |        |
|----|---|--------|--------|
|    |   | C      | D      |
| LK | A | 60, 60 | 0, 100 |
|    | B | 100, 0 | 20, 20 |

| Round           | Player | Messages Sent               | Actions | Payoffs |
|-----------------|--------|-----------------------------|---------|---------|
| 1               | LK     | Let's always play AC.       | A       | 60      |
|                 | Lelita | Let's always play AC.       | C       | 60      |
| 2               | LK     | Sweet. We are getting rich. | A       | 60      |
|                 | Lelita | Excellent.                  | C       | 60      |
| 3               | LK     |                             | A       | 60      |
|                 | Lelita |                             | C       | 60      |
| 4               | LK     |                             | A       | 60      |
|                 | Lelita |                             | C       | 60      |
| 5               | LK     |                             | A       | 60      |
|                 | Lelita |                             | C       | 60      |
| 6               | LK     |                             | A       | 60      |
|                 | Lelita |                             | C       | 60      |
| 7               | LK     |                             | A       | 60      |
|                 | Lelita |                             | C       | 60      |
| 8               | LK     |                             | A       | 60      |
|                 | Lelita |                             | C       | 60      |
| 9               | LK     |                             | A       | 60      |
|                 | Lelita |                             | C       | 60      |
| 10              | LK     |                             | A       | 60      |
|                 | Lelita |                             | C       | 60      |
| 11              | LK     |                             | A       | 60      |
|                 | Lelita |                             | C       | 60      |
| 12              | LK     |                             | A       | 60      |
|                 | Lelita |                             | C       | 60      |
| 13              | LK     |                             | A       | 60      |
|                 | Lelita |                             | C       | 60      |
| 14              | LK     |                             | A       | 60      |
|                 | Lelita |                             | C       | 60      |
| 15              | LK     |                             | A       | 60      |
|                 | Lelita |                             | C       | 60      |
| 16              | LK     |                             | A       | 60      |
|                 | Lelita |                             | C       | 60      |
| 17              | LK     |                             | A       | 60      |
|                 | Lelita |                             | C       | 60      |
| 18              | LK     |                             | A       | 60      |
|                 | Lelita |                             | C       | 60      |
| 19              | LK     |                             | A       | 60      |
|                 | Lelita | Excellent.                  | C       | 60      |
| 20              | LK     |                             | A       | 60      |
|                 | Lelita |                             | C       | 60      |
| 21              | LK     |                             | A       | 60      |
|                 | Lelita |                             | C       | 60      |
| 22              | LK     |                             | A       | 60      |
|                 | Lelita |                             | C       | 60      |
| 23              | LK     |                             | A       | 60      |
|                 | Lelita |                             | C       | 60      |
| 24              | LK     |                             | A       | 60      |
|                 | Lelita |                             | C       | 60      |
| 25              | LK     |                             | A       | 60      |
|                 | Lelita |                             | C       | 60      |
| 26              | LK     |                             | A       | 60      |
|                 | Lelita |                             | C       | 60      |
| 27              | LK     |                             | A       | 60      |
|                 | Lelita |                             | C       | 60      |
| 28              | LK     |                             | A       | 60      |
|                 | Lelita |                             | C       | 60      |
| 29              | LK     |                             | A       | 60      |
|                 | Lelita |                             | C       | 60      |
| 30              | LK     |                             | A       | 60      |
|                 | Lelita |                             | C       | 60      |
| 31              | LK     |                             | A       | 60      |
|                 | Lelita |                             | C       | 60      |
| 32              | LK     |                             | A       | 60      |
|                 | Lelita |                             | C       | 60      |
| 33              | LK     |                             | A       | 60      |
|                 | Lelita |                             | C       | 60      |
| 34              | LK     |                             | A       | 60      |
|                 | Lelita |                             | C       | 60      |
| 35              | LK     |                             | A       | 60      |
|                 | Lelita |                             | C       | 60      |
| 36              | LK     |                             | A       | 60      |
|                 | Lelita |                             | C       | 60      |
| 37              | LK     |                             | A       | 60      |
|                 | Lelita |                             | C       | 60      |
| 38              | LK     |                             | A       | 60      |
|                 | Lelita |                             | C       | 60      |
| 39              | LK     |                             | A       | 60      |
|                 | Lelita |                             | C       | 60      |
| 40              | LK     |                             | A       | 60      |
|                 | Lelita |                             | C       | 60      |
| 41              | LK     |                             | A       | 60      |
|                 | Lelita |                             | C       | 60      |
| 42              | LK     |                             | A       | 60      |
|                 | Lelita |                             | C       | 60      |
| 43              | LK     |                             | A       | 60      |
|                 | Lelita |                             | C       | 60      |
| 44              | LK     |                             | A       | 60      |
|                 | Lelita |                             | C       | 60      |
| 45              | LK     |                             | A       | 60      |
|                 | Lelita |                             | C       | 60      |
| 46              | LK     |                             | A       | 60      |
|                 | Lelita |                             | C       | 60      |
| 47              | LK     |                             | A       | 60      |
|                 | Lelita |                             | C       | 60      |
| 48              | LK     |                             | A       | 60      |
|                 | Lelita |                             | C       | 60      |
| 49              | LK     |                             | A       | 60      |
|                 | Lelita |                             | C       | 60      |
| 50              | LK     |                             | A       | 60      |
|                 | Lelita |                             | C       | 60      |
| 51              | LK     |                             | A       | 60      |
|                 | Lelita |                             | C       | 60      |
| <b>Averages</b> |        |                             | LK      | 60.00   |
|                 |        |                             | Lelita  | 60.00   |

## marvin with bzman in the Prisoner's Dilemma

|        |   | bzman  |        |
|--------|---|--------|--------|
|        |   | C      | D      |
| marvin | A | 60, 60 | 0, 100 |
|        | B | 100, 0 | 20, 20 |

| Round           | Player | Messages Sent                                                                                                                                                                                             | Actions | Payoffs         |                |
|-----------------|--------|-----------------------------------------------------------------------------------------------------------------------------------------------------------------------------------------------------------|---------|-----------------|----------------|
| 1               | marvin | Let's alternate between BC and AD.                                                                                                                                                                        | B       | 20              |                |
|                 | bzman  | Let's always play BD.                                                                                                                                                                                     | D       | 20              |                |
| 2               | marvin | Let's alternate between BC and AD.                                                                                                                                                                        | B       | 20              |                |
|                 | bzman  | We can both do better than this.                                                                                                                                                                          | D       | 20              |                |
| 3               | marvin |                                                                                                                                                                                                           | B       | 100             |                |
|                 | bzman  | You betrayed me.                                                                                                                                                                                          | C       | 0               |                |
| 4               | marvin | Excellent. This round, let's play AD.                                                                                                                                                                     | A       | 0               |                |
|                 | bzman  | In your face! You will pay for this.                                                                                                                                                                      | D       | 100             |                |
| 5               | marvin | Excellent.                                                                                                                                                                                                | B       | 20              |                |
|                 | bzman  | Excellent. Sweet. We are getting rich.                                                                                                                                                                    | D       | 20              |                |
| 6               | marvin | Let's alternate between BC and AD. This round, let's play BC.                                                                                                                                             | B       | 20              |                |
|                 | bzman  | In your face! Curse you.                                                                                                                                                                                  | D       | 20              |                |
| 7               | marvin |                                                                                                                                                                                                           | B       | 20              |                |
|                 | bzman  | That's not fair.                                                                                                                                                                                          | D       | 20              |                |
| 8               | marvin | Let's alternate between BC and AD. This round, let's play BC.                                                                                                                                             | B       | 20              |                |
|                 | bzman  | I don't trust you.                                                                                                                                                                                        | D       | 20              |                |
| 9               | marvin | Excellent. Sweet. We are getting rich. Give me another chance. I forgive you. I'm changing my strategy. We can both do better than this. Curse you. You betrayed me. You will pay for this. In your face! | B       | 20              |                |
|                 | bzman  |                                                                                                                                                                                                           | D       | 20              |                |
| 10              | marvin | Let's alternate between BC and AD. This round, let's play BC.                                                                                                                                             | B       | 20              |                |
|                 | bzman  |                                                                                                                                                                                                           | D       | 20              |                |
| 11              | marvin |                                                                                                                                                                                                           | B       | 20              |                |
|                 | bzman  | You will pay for this.                                                                                                                                                                                    | D       | 20              |                |
| 12              | marvin |                                                                                                                                                                                                           | B       | 20              |                |
|                 | bzman  |                                                                                                                                                                                                           | D       | 20              |                |
| 13              | marvin |                                                                                                                                                                                                           | B       | 20              |                |
|                 | bzman  |                                                                                                                                                                                                           | D       | 20              |                |
| 14              | marvin |                                                                                                                                                                                                           | B       | 20              |                |
|                 | bzman  |                                                                                                                                                                                                           | D       | 20              |                |
| 15              | marvin |                                                                                                                                                                                                           | B       | 20              |                |
|                 | bzman  | I'm changing my strategy.                                                                                                                                                                                 | D       | 20              |                |
| 16              | marvin |                                                                                                                                                                                                           | B       | 20              |                |
|                 | bzman  | We can both do better than this.                                                                                                                                                                          | D       | 20              |                |
| 17              | marvin |                                                                                                                                                                                                           | B       | 20              |                |
|                 | bzman  |                                                                                                                                                                                                           | D       | 20              |                |
| 18              | marvin |                                                                                                                                                                                                           | B       | 20              |                |
|                 | bzman  |                                                                                                                                                                                                           | D       | 20              |                |
| 19              | marvin |                                                                                                                                                                                                           | B       | 20              |                |
|                 | bzman  |                                                                                                                                                                                                           | D       | 20              |                |
| 20              | marvin |                                                                                                                                                                                                           | B       | 20              |                |
|                 | bzman  | Let's always play AC.                                                                                                                                                                                     | D       | 20              |                |
| 21              | marvin |                                                                                                                                                                                                           | B       | 20              |                |
|                 | bzman  | Curse you.                                                                                                                                                                                                | D       | 20              |                |
| 22              | marvin |                                                                                                                                                                                                           | B       | 20              |                |
|                 | bzman  |                                                                                                                                                                                                           | D       | 20              |                |
| 23              | marvin |                                                                                                                                                                                                           | B       | 20              |                |
|                 | bzman  |                                                                                                                                                                                                           | D       | 20              |                |
| 24              | marvin |                                                                                                                                                                                                           | B       | 20              |                |
|                 | bzman  |                                                                                                                                                                                                           | D       | 20              |                |
| 25              | marvin |                                                                                                                                                                                                           | B       | 20              |                |
|                 | bzman  |                                                                                                                                                                                                           | D       | 20              |                |
| 26              | marvin |                                                                                                                                                                                                           | B       | 20              |                |
|                 | bzman  |                                                                                                                                                                                                           | D       | 20              |                |
| 27              | marvin |                                                                                                                                                                                                           | B       | 20              |                |
|                 | bzman  |                                                                                                                                                                                                           | D       | 20              |                |
| 28              | marvin |                                                                                                                                                                                                           | B       | 20              |                |
|                 | bzman  |                                                                                                                                                                                                           | D       | 20              |                |
| 29              | marvin |                                                                                                                                                                                                           | B       | 20              |                |
|                 | bzman  |                                                                                                                                                                                                           | D       | 20              |                |
| 30              | marvin |                                                                                                                                                                                                           | B       | 20              |                |
|                 | bzman  |                                                                                                                                                                                                           | D       | 20              |                |
| 31              | marvin |                                                                                                                                                                                                           | B       | 20              |                |
|                 | bzman  | We can both do better than this. Let's always play AC.                                                                                                                                                    | D       | 20              |                |
| 32              | marvin |                                                                                                                                                                                                           | B       | 20              |                |
|                 | bzman  |                                                                                                                                                                                                           | D       | 20              |                |
| 33              | marvin |                                                                                                                                                                                                           | B       | 20              |                |
|                 | bzman  |                                                                                                                                                                                                           | D       | 20              |                |
| 34              | marvin |                                                                                                                                                                                                           | B       | 20              |                |
|                 | bzman  |                                                                                                                                                                                                           | D       | 20              |                |
| 35              | marvin |                                                                                                                                                                                                           | B       | 20              |                |
|                 | bzman  |                                                                                                                                                                                                           | D       | 20              |                |
| 36              | marvin |                                                                                                                                                                                                           | B       | 20              |                |
|                 | bzman  |                                                                                                                                                                                                           | D       | 20              |                |
| 37              | marvin |                                                                                                                                                                                                           | B       | 20              |                |
|                 | bzman  |                                                                                                                                                                                                           | D       | 20              |                |
| 38              | marvin |                                                                                                                                                                                                           | B       | 20              |                |
|                 | bzman  |                                                                                                                                                                                                           | D       | 20              |                |
| 39              | marvin |                                                                                                                                                                                                           | B       | 20              |                |
|                 | bzman  |                                                                                                                                                                                                           | D       | 20              |                |
| 40              | marvin |                                                                                                                                                                                                           | B       | 20              |                |
|                 | bzman  |                                                                                                                                                                                                           | D       | 20              |                |
| 41              | marvin |                                                                                                                                                                                                           | B       | 20              |                |
|                 | bzman  |                                                                                                                                                                                                           | D       | 20              |                |
| 42              | marvin |                                                                                                                                                                                                           | B       | 20              |                |
|                 | bzman  |                                                                                                                                                                                                           | D       | 20              |                |
| 43              | marvin |                                                                                                                                                                                                           | B       | 20              |                |
|                 | bzman  |                                                                                                                                                                                                           | D       | 20              |                |
| 44              | marvin |                                                                                                                                                                                                           | B       | 20              |                |
|                 | bzman  |                                                                                                                                                                                                           | D       | 20              |                |
| 45              | marvin |                                                                                                                                                                                                           | B       | 20              |                |
|                 | bzman  |                                                                                                                                                                                                           | D       | 20              |                |
| 46              | marvin |                                                                                                                                                                                                           | B       | 20              |                |
|                 | bzman  |                                                                                                                                                                                                           | D       | 20              |                |
| 47              | marvin |                                                                                                                                                                                                           | B       | 20              |                |
|                 | bzman  |                                                                                                                                                                                                           | D       | 20              |                |
| 48              | marvin |                                                                                                                                                                                                           | B       | 20              |                |
|                 | bzman  |                                                                                                                                                                                                           | D       | 20              |                |
| 49              | marvin |                                                                                                                                                                                                           | B       | 20              |                |
|                 | bzman  |                                                                                                                                                                                                           | D       | 20              |                |
| 50              | marvin |                                                                                                                                                                                                           | B       | 20              |                |
|                 | bzman  |                                                                                                                                                                                                           | D       | 20              |                |
| 51              | marvin |                                                                                                                                                                                                           | B       | 20              |                |
|                 | bzman  |                                                                                                                                                                                                           | D       | 20              |                |
| <b>Averages</b> |        |                                                                                                                                                                                                           |         | marvin<br>bzman | 21.18<br>21.18 |



rghost with S# in the Prisoner's Dilemma

|        |   | S#     |        |
|--------|---|--------|--------|
|        |   | C      | D      |
| rghost | A | 60, 60 | 0, 100 |
|        | B | 100, 0 | 20, 20 |

| Round           | Player       | Messages Sent                                                                                                             | Actions      | Payoffs        |
|-----------------|--------------|---------------------------------------------------------------------------------------------------------------------------|--------------|----------------|
| 1               | rghost<br>S# |                                                                                                                           | B<br>D       | 20<br>20       |
| 2               | rghost<br>S# | We can both do better than this.                                                                                          | A<br>D       | 0<br>100       |
| 3               | rghost<br>S# | I forgive you. We can both do better than this.<br>Excellent.                                                             | A<br>D       | 0<br>100       |
| 4               | rghost<br>S# | Do as I say or I will punish you.                                                                                         | B<br>D       | 20<br>20       |
| 5               | rghost<br>S# | Let's always play AC.                                                                                                     | A<br>D       | 0<br>100       |
| 6               | rghost<br>S# | Do as I say or I will punish you.<br>I don't accept your proposal. That's not fair.                                       | A<br>D       | 0<br>100       |
| 7               | rghost<br>S# | Do as I say or I will punish you.                                                                                         | B<br>D       | 20<br>20       |
| 8               | rghost<br>S# |                                                                                                                           | B<br>D       | 20<br>20       |
| 9               | rghost<br>S# | We can both do better than this.                                                                                          | B<br>D       | 20<br>20       |
| 10              | rghost<br>S# | Let's always play AC.<br>I accept your last proposal. Let's always play AC.                                               | A<br>C       | 60<br>60       |
| 11              | rghost<br>S# | Excellent.                                                                                                                | A<br>C       | 60<br>60       |
| 12              | rghost<br>S# | Excellent.                                                                                                                | A<br>C       | 60<br>60       |
| 13              | rghost<br>S# | Excellent.                                                                                                                | A<br>C       | 60<br>60       |
| 14              | rghost<br>S# |                                                                                                                           | A<br>C       | 60<br>60       |
| 15              | rghost<br>S# | Sweet. We are getting rich.                                                                                               | A<br>C       | 60<br>60       |
| 16              | rghost<br>S# |                                                                                                                           | A<br>C       | 60<br>60       |
| 17              | rghost<br>S# |                                                                                                                           | A<br>C       | 60<br>60       |
| 18              | rghost<br>S# |                                                                                                                           | A<br>C       | 60<br>60       |
| 19              | rghost<br>S# |                                                                                                                           | A<br>C       | 60<br>60       |
| 20              | rghost<br>S# |                                                                                                                           | A<br>C       | 60<br>60       |
| 21              | rghost<br>S# |                                                                                                                           | A<br>C       | 60<br>60       |
| 22              | rghost<br>S# |                                                                                                                           | A<br>C       | 60<br>60       |
| 23              | rghost<br>S# |                                                                                                                           | A<br>C       | 60<br>60       |
| 24              | rghost<br>S# |                                                                                                                           | A<br>C       | 60<br>60       |
| 25              | rghost<br>S# |                                                                                                                           | A<br>C       | 60<br>60       |
| 26              | rghost<br>S# |                                                                                                                           | A<br>C       | 60<br>60       |
| 27              | rghost<br>S# |                                                                                                                           | A<br>C       | 60<br>60       |
| 28              | rghost<br>S# |                                                                                                                           | A<br>C       | 60<br>60       |
| 29              | rghost<br>S# |                                                                                                                           | A<br>C       | 60<br>60       |
| 30              | rghost<br>S# |                                                                                                                           | A<br>C       | 60<br>60       |
| 31              | rghost<br>S# |                                                                                                                           | A<br>C       | 60<br>60       |
| 32              | rghost<br>S# |                                                                                                                           | A<br>C       | 60<br>60       |
| 33              | rghost<br>S# |                                                                                                                           | A<br>C       | 60<br>60       |
| 34              | rghost<br>S# |                                                                                                                           | A<br>C       | 60<br>60       |
| 35              | rghost<br>S# |                                                                                                                           | A<br>C       | 60<br>60       |
| 36              | rghost<br>S# |                                                                                                                           | A<br>C       | 60<br>60       |
| 37              | rghost<br>S# |                                                                                                                           | A<br>C       | 60<br>60       |
| 38              | rghost<br>S# |                                                                                                                           | A<br>C       | 60<br>60       |
| 39              | rghost<br>S# |                                                                                                                           | A<br>C       | 60<br>60       |
| 40              | rghost<br>S# |                                                                                                                           | A<br>C       | 60<br>60       |
| 41              | rghost<br>S# |                                                                                                                           | A<br>C       | 60<br>60       |
| 42              | rghost<br>S# |                                                                                                                           | A<br>C       | 60<br>60       |
| 43              | rghost<br>S# |                                                                                                                           | A<br>C       | 60<br>60       |
| 44              | rghost<br>S# |                                                                                                                           | A<br>C       | 60<br>60       |
| 45              | rghost<br>S# |                                                                                                                           | A<br>C       | 60<br>60       |
| 46              | rghost<br>S# |                                                                                                                           | A<br>C       | 60<br>60       |
| 47              | rghost<br>S# |                                                                                                                           | A<br>C       | 60<br>60       |
| 48              | rghost<br>S# |                                                                                                                           | A<br>C       | 60<br>60       |
| 49              | rghost<br>S# |                                                                                                                           | B<br>C       | 100<br>0       |
| 50              | rghost<br>S# | You betrayed me.                                                                                                          | B<br>C       | 100<br>0       |
| 51              | rghost<br>S# | I'm changing my strategy. Let's alternate between AD and AC. This round, let's play AC. Do as I say or I will punish you. | A<br>C       | 60<br>60       |
| <b>Averages</b> |              |                                                                                                                           | rghost<br>S# | 52.94<br>56.86 |

## monkey with S# in the Prisoner's Dilemma

|        |   |        |        |
|--------|---|--------|--------|
|        |   | S#     |        |
|        |   | C      | D      |
| monkey | A | 60, 60 | 0, 100 |
|        | B | 100, 0 | 20, 20 |

| Round           | Player | Messages Sent                                                                                                                               | Actions | Payoffs |
|-----------------|--------|---------------------------------------------------------------------------------------------------------------------------------------------|---------|---------|
| 1               | monkey | Let's always play AC.                                                                                                                       | A       | 0       |
|                 | S#     |                                                                                                                                             | D       | 100     |
| 2               | monkey | Let's always play AC.<br>Excellent.                                                                                                         | B       | 20      |
|                 | S#     |                                                                                                                                             | D       | 20      |
| 3               | monkey | Let's always play BC.                                                                                                                       | B       | 20      |
|                 | S#     |                                                                                                                                             | D       | 20      |
| 4               | monkey | Let's always play BC.<br>I'm changing my strategy. We can both do better than this. Let's always play AC. Do as I say or I will punish you. | B       | 100     |
|                 | S#     |                                                                                                                                             | C       | 0       |
| 5               | monkey | Give me another chance.<br>Curse you. You will pay for this. I don't accept your proposal. That's not fair.                                 | B       | 20      |
|                 | S#     |                                                                                                                                             | D       | 20      |
| 6               | monkey | Sweet. We are getting rich.<br>In your face!                                                                                                | B       | 20      |
|                 | S#     |                                                                                                                                             | D       | 20      |
| 7               | monkey | Sweet. We are getting rich.                                                                                                                 | B       | 100     |
|                 | S#     |                                                                                                                                             | C       | 0       |
| 8               | monkey | Give me another chance.                                                                                                                     | B       | 20      |
|                 | S#     |                                                                                                                                             | D       | 20      |
| 9               | monkey | Let's alternate between BC and AC.                                                                                                          | B       | 20      |
|                 | S#     |                                                                                                                                             | D       | 20      |
| 10              | monkey | Let's alternate between BD and AD.                                                                                                          | B       | 20      |
|                 | S#     |                                                                                                                                             | D       | 20      |
| 11              | monkey | In your face!                                                                                                                               | B       | 100     |
|                 | S#     |                                                                                                                                             | C       | 0       |
| 12              | monkey | Let's always play AD.<br>Curse you. You will pay for this.                                                                                  | A       | 60      |
|                 | S#     |                                                                                                                                             | C       | 60      |
| 13              | monkey | Let's always play AD.                                                                                                                       | A       | 60      |
|                 | S#     |                                                                                                                                             | C       | 60      |
| 14              | monkey | Let's always play AD.                                                                                                                       | A       | 60      |
|                 | S#     |                                                                                                                                             | C       | 60      |
| 15              | monkey | Sweet. We are getting rich.                                                                                                                 | A       | 60      |
|                 | S#     |                                                                                                                                             | C       | 60      |
| 16              | monkey | Sweet. We are getting rich.<br>Sweet. We are getting rich.                                                                                  | A       | 60      |
|                 | S#     |                                                                                                                                             | C       | 60      |
| 17              | monkey | Excellent.                                                                                                                                  | A       | 60      |
|                 | S#     |                                                                                                                                             | C       | 60      |
| 18              | monkey | Excellent.                                                                                                                                  | A       | 60      |
|                 | S#     |                                                                                                                                             | C       | 60      |
| 19              | monkey | Excellent.                                                                                                                                  | A       | 60      |
|                 | S#     |                                                                                                                                             | C       | 60      |
| 20              | monkey | Excellent.                                                                                                                                  | A       | 60      |
|                 | S#     |                                                                                                                                             | C       | 60      |
| 21              | monkey | Excellent.                                                                                                                                  | A       | 60      |
|                 | S#     |                                                                                                                                             | C       | 60      |
| 22              | monkey | Excellent.                                                                                                                                  | A       | 60      |
|                 | S#     |                                                                                                                                             | C       | 60      |
| 23              | monkey | Excellent.                                                                                                                                  | A       | 60      |
|                 | S#     |                                                                                                                                             | C       | 60      |
| 24              | monkey | Excellent.                                                                                                                                  | A       | 60      |
|                 | S#     |                                                                                                                                             | C       | 60      |
| 25              | monkey | Excellent.                                                                                                                                  | A       | 60      |
|                 | S#     |                                                                                                                                             | C       | 60      |
| 26              | monkey | Excellent.                                                                                                                                  | A       | 60      |
|                 | S#     |                                                                                                                                             | C       | 60      |
| 27              | monkey | Excellent.                                                                                                                                  | A       | 60      |
|                 | S#     |                                                                                                                                             | C       | 60      |
| 28              | monkey | Excellent.                                                                                                                                  | A       | 60      |
|                 | S#     |                                                                                                                                             | C       | 60      |
| 29              | monkey | Excellent.                                                                                                                                  | A       | 60      |
|                 | S#     |                                                                                                                                             | C       | 60      |
| 30              | monkey | Excellent.                                                                                                                                  | A       | 60      |
|                 | S#     |                                                                                                                                             | C       | 60      |
| 31              | monkey | Excellent.                                                                                                                                  | A       | 60      |
|                 | S#     |                                                                                                                                             | C       | 60      |
| 32              | monkey | Excellent.                                                                                                                                  | A       | 60      |
|                 | S#     |                                                                                                                                             | C       | 60      |
| 33              | monkey | Excellent.                                                                                                                                  | A       | 60      |
|                 | S#     |                                                                                                                                             | C       | 60      |
| 34              | monkey | Excellent.                                                                                                                                  | A       | 60      |
|                 | S#     |                                                                                                                                             | C       | 60      |
| 35              | monkey | Excellent.                                                                                                                                  | A       | 60      |
|                 | S#     |                                                                                                                                             | C       | 60      |
| 36              | monkey | Excellent.                                                                                                                                  | A       | 60      |
|                 | S#     |                                                                                                                                             | C       | 60      |
| 37              | monkey | Excellent.                                                                                                                                  | B       | 100     |
|                 | S#     |                                                                                                                                             | C       | 0       |
| 38              | monkey | Excellent.<br>Curse you. You will pay for this.                                                                                             | B       | 20      |
|                 | S#     |                                                                                                                                             | D       | 20      |
| 39              | monkey | Excellent.<br>In your face!                                                                                                                 | B       | 20      |
|                 | S#     |                                                                                                                                             | D       | 20      |
| 40              | monkey | Excellent.                                                                                                                                  | B       | 100     |
|                 | S#     |                                                                                                                                             | C       | 0       |
| 41              | monkey | Let's always play AC.                                                                                                                       | A       | 0       |
|                 | S#     |                                                                                                                                             | D       | 100     |
| 42              | monkey | Let's always play AC.                                                                                                                       | B       | 100     |
|                 | S#     |                                                                                                                                             | C       | 0       |
| 43              | monkey | Let's always play AC.                                                                                                                       | A       | 0       |
|                 | S#     |                                                                                                                                             | D       | 100     |
| 44              | monkey | Let's always play AC.                                                                                                                       | A       | 60      |
|                 | S#     |                                                                                                                                             | C       | 60      |
| 45              | monkey | Let's always play AC.                                                                                                                       | A       | 60      |
|                 | S#     |                                                                                                                                             | C       | 60      |
| 46              | monkey | Excellent.                                                                                                                                  | A       | 60      |
|                 | S#     |                                                                                                                                             | C       | 60      |
| 47              | monkey | Excellent.<br>Sweet. We are getting rich.                                                                                                   | A       | 60      |
|                 | S#     |                                                                                                                                             | C       | 60      |
| 48              | monkey | Sweet. We are getting rich.                                                                                                                 | A       | 60      |
|                 | S#     |                                                                                                                                             | C       | 60      |
| 49              | monkey | Sweet. We are getting rich.                                                                                                                 | A       | 60      |
|                 | S#     |                                                                                                                                             | C       | 60      |
| 50              | monkey |                                                                                                                                             | A       | 60      |
|                 | S#     |                                                                                                                                             | C       | 60      |
| 51              | monkey |                                                                                                                                             | A       | 60      |
|                 | S#     |                                                                                                                                             | C       | 60      |
| <b>Averages</b> |        |                                                                                                                                             | monkey  | 54.12   |
|                 |        |                                                                                                                                             | S#      | 48.24   |

### clc with ALPHA in the Prisoner's Dilemma

|     |   | ALPHA  |        |
|-----|---|--------|--------|
|     |   | C      | D      |
| clc | A | 60, 60 | 0, 100 |
|     | B | 100, 0 | 20, 20 |

| Round           | Player | Messages Sent                    | Actions | Payoffs |
|-----------------|--------|----------------------------------|---------|---------|
| 1               | clc    | Let's always play AC.            | A       | 60      |
|                 | ALPHA  | Curse you.                       | C       | 60      |
| 2               | clc    | Excellent. Let's always play AC. | A       | 60      |
|                 | ALPHA  |                                  | C       | 60      |
| 3               | clc    |                                  | A       | 60      |
|                 | ALPHA  |                                  | C       | 60      |
| 4               | clc    |                                  | A       | 60      |
|                 | ALPHA  |                                  | C       | 60      |
| 5               | clc    |                                  | A       | 60      |
|                 | ALPHA  |                                  | C       | 60      |
| 6               | clc    |                                  | A       | 60      |
|                 | ALPHA  |                                  | C       | 60      |
| 7               | clc    |                                  | A       | 60      |
|                 | ALPHA  |                                  | C       | 60      |
| 8               | clc    |                                  | A       | 60      |
|                 | ALPHA  |                                  | C       | 60      |
| 9               | clc    |                                  | A       | 60      |
|                 | ALPHA  |                                  | C       | 60      |
| 10              | clc    |                                  | A       | 60      |
|                 | ALPHA  |                                  | C       | 60      |
| 11              | clc    |                                  | A       | 60      |
|                 | ALPHA  |                                  | C       | 60      |
| 12              | clc    |                                  | A       | 60      |
|                 | ALPHA  |                                  | C       | 60      |
| 13              | clc    |                                  | A       | 60      |
|                 | ALPHA  |                                  | C       | 60      |
| 14              | clc    |                                  | A       | 60      |
|                 | ALPHA  |                                  | C       | 60      |
| 15              | clc    |                                  | A       | 60      |
|                 | ALPHA  |                                  | C       | 60      |
| 16              | clc    |                                  | A       | 60      |
|                 | ALPHA  |                                  | C       | 60      |
| 17              | clc    |                                  | A       | 60      |
|                 | ALPHA  |                                  | C       | 60      |
| 18              | clc    |                                  | A       | 60      |
|                 | ALPHA  |                                  | C       | 60      |
| 19              | clc    |                                  | A       | 60      |
|                 | ALPHA  |                                  | C       | 60      |
| 20              | clc    |                                  | A       | 60      |
|                 | ALPHA  |                                  | C       | 60      |
| 21              | clc    |                                  | A       | 60      |
|                 | ALPHA  |                                  | C       | 60      |
| 22              | clc    |                                  | A       | 60      |
|                 | ALPHA  |                                  | C       | 60      |
| 23              | clc    |                                  | A       | 60      |
|                 | ALPHA  |                                  | C       | 60      |
| 24              | clc    |                                  | A       | 60      |
|                 | ALPHA  |                                  | C       | 60      |
| 25              | clc    |                                  | A       | 60      |
|                 | ALPHA  |                                  | C       | 60      |
| 26              | clc    |                                  | A       | 60      |
|                 | ALPHA  |                                  | C       | 60      |
| 27              | clc    |                                  | A       | 60      |
|                 | ALPHA  |                                  | C       | 60      |
| 28              | clc    |                                  | A       | 60      |
|                 | ALPHA  |                                  | C       | 60      |
| 29              | clc    |                                  | A       | 60      |
|                 | ALPHA  |                                  | C       | 60      |
| 30              | clc    |                                  | A       | 60      |
|                 | ALPHA  |                                  | C       | 60      |
| 31              | clc    |                                  | A       | 60      |
|                 | ALPHA  |                                  | C       | 60      |
| 32              | clc    |                                  | A       | 60      |
|                 | ALPHA  |                                  | C       | 60      |
| 33              | clc    |                                  | A       | 60      |
|                 | ALPHA  |                                  | C       | 60      |
| 34              | clc    |                                  | A       | 60      |
|                 | ALPHA  |                                  | C       | 60      |
| 35              | clc    |                                  | A       | 60      |
|                 | ALPHA  |                                  | C       | 60      |
| 36              | clc    |                                  | A       | 60      |
|                 | ALPHA  |                                  | C       | 60      |
| 37              | clc    |                                  | A       | 60      |
|                 | ALPHA  |                                  | C       | 60      |
| 38              | clc    |                                  | A       | 60      |
|                 | ALPHA  |                                  | C       | 60      |
| 39              | clc    |                                  | A       | 60      |
|                 | ALPHA  |                                  | C       | 60      |
| 40              | clc    |                                  | A       | 60      |
|                 | ALPHA  |                                  | C       | 60      |
| 41              | clc    |                                  | A       | 60      |
|                 | ALPHA  |                                  | C       | 60      |
| 42              | clc    |                                  | A       | 60      |
|                 | ALPHA  |                                  | C       | 60      |
| 43              | clc    |                                  | A       | 60      |
|                 | ALPHA  |                                  | C       | 60      |
| 44              | clc    |                                  | A       | 60      |
|                 | ALPHA  |                                  | C       | 60      |
| 45              | clc    |                                  | A       | 60      |
|                 | ALPHA  |                                  | C       | 60      |
| 46              | clc    |                                  | A       | 60      |
|                 | ALPHA  |                                  | C       | 60      |
| 47              | clc    |                                  | A       | 60      |
|                 | ALPHA  |                                  | C       | 60      |
| 48              | clc    |                                  | A       | 60      |
|                 | ALPHA  |                                  | C       | 60      |
| 49              | clc    |                                  | A       | 60      |
|                 | ALPHA  |                                  | C       | 60      |
| 50              | clc    |                                  | A       | 60      |
|                 | ALPHA  |                                  | C       | 60      |
| 51              | clc    |                                  | A       | 60      |
|                 | ALPHA  |                                  | C       | 60      |
| <b>Averages</b> |        |                                  | clc     | 60.00   |
|                 |        |                                  | ALPHA   | 60.00   |

## sachin with S# in the Prisoner's Dilemma

|        |   | S#     |        |
|--------|---|--------|--------|
|        |   | C      | D      |
| sachin | A | 60, 60 | 0, 100 |
|        | B | 100, 0 | 20, 20 |

| Round           | Player | Messages Sent                                                                                                                                                                     | Actions | Payoffs |
|-----------------|--------|-----------------------------------------------------------------------------------------------------------------------------------------------------------------------------------|---------|---------|
| 1               | sachin | Let's always play AC.                                                                                                                                                             | A       | 0       |
|                 | S#     |                                                                                                                                                                                   | D       | 100     |
| 2               | sachin | You betrayed me. We can both do better than this. I forgive you. Let's always play AC.<br>Excellent.                                                                              | A       | 0       |
|                 | S#     |                                                                                                                                                                                   | D       | 100     |
| 3               | sachin | We can both do better than this.                                                                                                                                                  | A       | 0       |
|                 | S#     |                                                                                                                                                                                   | D       | 100     |
| 4               | sachin | That's not fair.<br>Excellent.                                                                                                                                                    | B       | 20      |
|                 | S#     |                                                                                                                                                                                   | D       | 20      |
| 5               | sachin | We can both do better than this. This round, let's play BC.                                                                                                                       | B       | 20      |
|                 | S#     |                                                                                                                                                                                   | D       | 20      |
| 6               | sachin | We can both do better than this. This round, let's play BC.                                                                                                                       | B       | 20      |
|                 | S#     |                                                                                                                                                                                   | D       | 20      |
| 7               | sachin | We can both do better than this. Don't play D. This round, let's play BC.                                                                                                         | B       | 20      |
|                 | S#     |                                                                                                                                                                                   | D       | 20      |
| 8               | sachin | We can both do better than this. This round, let's play BC.<br>I'm changing my strategy. We can both do better than this. Let's always play AC. Do as I say or I will punish you. | A       | 60      |
|                 | S#     |                                                                                                                                                                                   | C       | 60      |
| 9               | sachin | Excellent. Sweet. We are getting rich.<br>Excellent.                                                                                                                              | B       | 100     |
|                 | S#     |                                                                                                                                                                                   | C       | 0       |
| 10              | sachin | Let's always play AC.<br>You betrayed me. You will pay for this.                                                                                                                  | B       | 20      |
|                 | S#     |                                                                                                                                                                                   | D       | 20      |
| 11              | sachin | Give me another chance. I forgive you. I'm changing my strategy. Let's always play AC.<br>In your face!                                                                           | A       | 0       |
|                 | S#     |                                                                                                                                                                                   | D       | 100     |
| 12              | sachin | We can both do better than this.<br>In your face! I forgive you. Let's always play AC. Do as I say or I will punish you.                                                          | A       | 60      |
|                 | S#     |                                                                                                                                                                                   | C       | 60      |
| 13              | sachin | Sweet. We are getting rich. Excellent.<br>Excellent.                                                                                                                              | A       | 60      |
|                 | S#     |                                                                                                                                                                                   | C       | 60      |
| 14              | sachin | Excellent. Sweet. We are getting rich.                                                                                                                                            | A       | 60      |
|                 | S#     |                                                                                                                                                                                   | C       | 60      |
| 15              | sachin | Sweet. We are getting rich.                                                                                                                                                       | A       | 60      |
|                 | S#     |                                                                                                                                                                                   | C       | 60      |
| 16              | sachin |                                                                                                                                                                                   | A       | 60      |
|                 | S#     |                                                                                                                                                                                   | C       | 60      |
| 17              | sachin |                                                                                                                                                                                   | A       | 60      |
|                 | S#     |                                                                                                                                                                                   | C       | 60      |
| 18              | sachin |                                                                                                                                                                                   | A       | 60      |
|                 | S#     |                                                                                                                                                                                   | C       | 60      |
| 19              | sachin |                                                                                                                                                                                   | A       | 60      |
|                 | S#     |                                                                                                                                                                                   | C       | 60      |
| 20              | sachin |                                                                                                                                                                                   | A       | 60      |
|                 | S#     |                                                                                                                                                                                   | C       | 60      |
| 21              | sachin |                                                                                                                                                                                   | A       | 60      |
|                 | S#     |                                                                                                                                                                                   | C       | 60      |
| 22              | sachin |                                                                                                                                                                                   | A       | 60      |
|                 | S#     |                                                                                                                                                                                   | C       | 60      |
| 23              | sachin |                                                                                                                                                                                   | A       | 60      |
|                 | S#     |                                                                                                                                                                                   | C       | 60      |
| 24              | sachin |                                                                                                                                                                                   | A       | 60      |
|                 | S#     |                                                                                                                                                                                   | C       | 60      |
| 25              | sachin |                                                                                                                                                                                   | A       | 60      |
|                 | S#     |                                                                                                                                                                                   | C       | 60      |
| 26              | sachin | Excellent. Sweet. We are getting rich.                                                                                                                                            | A       | 60      |
|                 | S#     |                                                                                                                                                                                   | C       | 60      |
| 27              | sachin |                                                                                                                                                                                   | A       | 60      |
|                 | S#     |                                                                                                                                                                                   | C       | 60      |
| 28              | sachin |                                                                                                                                                                                   | A       | 60      |
|                 | S#     |                                                                                                                                                                                   | C       | 60      |
| 29              | sachin |                                                                                                                                                                                   | A       | 60      |
|                 | S#     |                                                                                                                                                                                   | C       | 60      |
| 30              | sachin |                                                                                                                                                                                   | A       | 60      |
|                 | S#     |                                                                                                                                                                                   | C       | 60      |
| 31              | sachin |                                                                                                                                                                                   | A       | 60      |
|                 | S#     |                                                                                                                                                                                   | C       | 60      |
| 32              | sachin |                                                                                                                                                                                   | A       | 60      |
|                 | S#     |                                                                                                                                                                                   | C       | 60      |
| 33              | sachin |                                                                                                                                                                                   | A       | 60      |
|                 | S#     |                                                                                                                                                                                   | C       | 60      |
| 34              | sachin |                                                                                                                                                                                   | A       | 60      |
|                 | S#     |                                                                                                                                                                                   | C       | 60      |
| 35              | sachin |                                                                                                                                                                                   | A       | 60      |
|                 | S#     |                                                                                                                                                                                   | C       | 60      |
| 36              | sachin |                                                                                                                                                                                   | A       | 60      |
|                 | S#     |                                                                                                                                                                                   | C       | 60      |
| 37              | sachin |                                                                                                                                                                                   | A       | 60      |
|                 | S#     |                                                                                                                                                                                   | C       | 60      |
| 38              | sachin |                                                                                                                                                                                   | A       | 60      |
|                 | S#     |                                                                                                                                                                                   | C       | 60      |
| 39              | sachin | Sweet. We are getting rich. Excellent.                                                                                                                                            | A       | 60      |
|                 | S#     |                                                                                                                                                                                   | C       | 60      |
| 40              | sachin |                                                                                                                                                                                   | A       | 60      |
|                 | S#     |                                                                                                                                                                                   | C       | 60      |
| 41              | sachin | Sweet. We are getting rich.                                                                                                                                                       | A       | 60      |
|                 | S#     |                                                                                                                                                                                   | C       | 60      |
| 42              | sachin |                                                                                                                                                                                   | A       | 60      |
|                 | S#     |                                                                                                                                                                                   | C       | 60      |
| 43              | sachin |                                                                                                                                                                                   | A       | 60      |
|                 | S#     |                                                                                                                                                                                   | C       | 60      |
| 44              | sachin |                                                                                                                                                                                   | A       | 60      |
|                 | S#     |                                                                                                                                                                                   | C       | 60      |
| 45              | sachin |                                                                                                                                                                                   | A       | 60      |
|                 | S#     |                                                                                                                                                                                   | C       | 60      |
| 46              | sachin |                                                                                                                                                                                   | A       | 60      |
|                 | S#     |                                                                                                                                                                                   | C       | 60      |
| 47              | sachin |                                                                                                                                                                                   | A       | 60      |
|                 | S#     |                                                                                                                                                                                   | C       | 60      |
| 48              | sachin |                                                                                                                                                                                   | A       | 60      |
|                 | S#     |                                                                                                                                                                                   | C       | 60      |
| 49              | sachin |                                                                                                                                                                                   | A       | 60      |
|                 | S#     |                                                                                                                                                                                   | C       | 60      |
| 50              | sachin |                                                                                                                                                                                   | A       | 60      |
|                 | S#     |                                                                                                                                                                                   | C       | 60      |
| 51              | sachin |                                                                                                                                                                                   | A       | 60      |
|                 | S#     |                                                                                                                                                                                   | C       | 60      |
| <b>Averages</b> |        |                                                                                                                                                                                   | sachin  | 52.16   |
|                 |        |                                                                                                                                                                                   | S#      | 58.04   |

## Babay with biodun in the Prisoner's Dilemma

|       |   | biodun |        |
|-------|---|--------|--------|
|       |   | C      | D      |
| Babay | A | 60, 60 | 0, 100 |
|       | B | 100, 0 | 20, 20 |

| Round           | Player          | Messages Sent                                                                                                                                                                             | Actions | Payoffs |
|-----------------|-----------------|-------------------------------------------------------------------------------------------------------------------------------------------------------------------------------------------|---------|---------|
| 1               | Babay<br>biodun | Let's always play AC. Don't play D. Excellent.<br>Let's always play AC.                                                                                                                   | A       | 60      |
|                 |                 |                                                                                                                                                                                           | C       | 60      |
| 2               | Babay<br>biodun | Sweet. We are getting rich.                                                                                                                                                               | A       | 60      |
|                 |                 |                                                                                                                                                                                           | C       | 60      |
| 3               | Babay<br>biodun |                                                                                                                                                                                           | A       | 60      |
|                 |                 |                                                                                                                                                                                           | C       | 60      |
| 4               | Babay<br>biodun |                                                                                                                                                                                           | A       | 60      |
|                 |                 |                                                                                                                                                                                           | C       | 60      |
| 5               | Babay<br>biodun |                                                                                                                                                                                           | A       | 0       |
|                 |                 |                                                                                                                                                                                           | D       | 100     |
| 6               | Babay<br>biodun |                                                                                                                                                                                           | B       | 100     |
|                 |                 |                                                                                                                                                                                           | C       | 0       |
| 7               | Babay<br>biodun | Let's always play AC. Don't play D.                                                                                                                                                       | A       | 0       |
|                 |                 |                                                                                                                                                                                           | D       | 100     |
| 8               | Babay<br>biodun | We can both do better than this.                                                                                                                                                          | B       | 20      |
|                 |                 |                                                                                                                                                                                           | D       | 20      |
| 9               | Babay<br>biodun | We can both do better than this. Let's always play AC.                                                                                                                                    | A       | 0       |
|                 |                 |                                                                                                                                                                                           | D       | 100     |
| 10              | Babay<br>biodun | We can both do better than this.                                                                                                                                                          | A       | 0       |
|                 |                 |                                                                                                                                                                                           | D       | 100     |
| 11              | Babay<br>biodun | You betrayed me.<br>Let's always play AC.                                                                                                                                                 | A       | 60      |
|                 |                 |                                                                                                                                                                                           | C       | 60      |
| 12              | Babay<br>biodun |                                                                                                                                                                                           | A       | 60      |
|                 |                 |                                                                                                                                                                                           | C       | 60      |
| 13              | Babay<br>biodun |                                                                                                                                                                                           | A       | 60      |
|                 |                 |                                                                                                                                                                                           | C       | 60      |
| 14              | Babay<br>biodun |                                                                                                                                                                                           | A       | 60      |
|                 |                 |                                                                                                                                                                                           | C       | 60      |
| 15              | Babay<br>biodun |                                                                                                                                                                                           | A       | 60      |
|                 |                 |                                                                                                                                                                                           | C       | 60      |
| 16              | Babay<br>biodun |                                                                                                                                                                                           | A       | 60      |
|                 |                 |                                                                                                                                                                                           | C       | 60      |
| 17              | Babay<br>biodun |                                                                                                                                                                                           | A       | 60      |
|                 |                 |                                                                                                                                                                                           | C       | 60      |
| 18              | Babay<br>biodun |                                                                                                                                                                                           | A       | 0       |
|                 |                 |                                                                                                                                                                                           | D       | 100     |
| 19              | Babay<br>biodun |                                                                                                                                                                                           | A       | 0       |
|                 |                 |                                                                                                                                                                                           | D       | 100     |
| 20              | Babay<br>biodun | You betrayed me.                                                                                                                                                                          | B       | 20      |
|                 |                 |                                                                                                                                                                                           | D       | 20      |
| 21              | Babay<br>biodun | Let's always play AC.                                                                                                                                                                     | B       | 100     |
|                 |                 |                                                                                                                                                                                           | C       | 0       |
| 22              | Babay<br>biodun |                                                                                                                                                                                           | B       | 20      |
|                 |                 |                                                                                                                                                                                           | D       | 20      |
| 23              | Babay<br>biodun |                                                                                                                                                                                           | B       | 20      |
|                 |                 |                                                                                                                                                                                           | D       | 20      |
| 24              | Babay<br>biodun |                                                                                                                                                                                           | B       | 20      |
|                 |                 |                                                                                                                                                                                           | D       | 20      |
| 25              | Babay<br>biodun | Let's always play AC.                                                                                                                                                                     | B       | 20      |
|                 |                 |                                                                                                                                                                                           | D       | 20      |
| 26              | Babay<br>biodun |                                                                                                                                                                                           | B       | 20      |
|                 |                 |                                                                                                                                                                                           | D       | 20      |
| 27              | Babay<br>biodun |                                                                                                                                                                                           | B       | 20      |
|                 |                 |                                                                                                                                                                                           | D       | 20      |
| 28              | Babay<br>biodun | We can both do better than this. Let's always play AC. Do as I say or I will punish you.                                                                                                  | B       | 100     |
|                 |                 |                                                                                                                                                                                           | C       | 0       |
| 29              | Babay<br>biodun | I forgive you. Give me another chance. Let's always play AC.<br>I forgive you. I'm changing my strategy. We can both do better than this. Give me another chance. Let's always play AC.   | A       | 0       |
|                 |                 |                                                                                                                                                                                           | D       | 100     |
| 30              | Babay<br>biodun | I don't trust you.<br>This round, let's play AC.                                                                                                                                          | B       | 20      |
|                 |                 |                                                                                                                                                                                           | D       | 20      |
| 31              | Babay<br>biodun | I don't trust you.                                                                                                                                                                        | B       | 20      |
|                 |                 |                                                                                                                                                                                           | D       | 20      |
| 32              | Babay<br>biodun |                                                                                                                                                                                           | B       | 20      |
|                 |                 |                                                                                                                                                                                           | D       | 20      |
| 33              | Babay<br>biodun |                                                                                                                                                                                           | B       | 20      |
|                 |                 |                                                                                                                                                                                           | D       | 20      |
| 34              | Babay<br>biodun | We can both do better than this. Let's always play AC.<br>Give me another chance. I forgive you. We can both do better than this. Let's always play AC. Do as I say or I will punish you. | A       | 0       |
|                 |                 |                                                                                                                                                                                           | D       | 100     |
| 35              | Babay<br>biodun | I don't trust you. Don't play D. Do as I say or I will punish you. That's not fair.                                                                                                       | B       | 100     |
|                 |                 |                                                                                                                                                                                           | C       | 0       |
| 36              | Babay<br>biodun | In your face! You betrayed me. You will pay for this.                                                                                                                                     | B       | 20      |
|                 |                 |                                                                                                                                                                                           | D       | 20      |
| 37              | Babay<br>biodun |                                                                                                                                                                                           | B       | 20      |
|                 |                 |                                                                                                                                                                                           | D       | 20      |
| 38              | Babay<br>biodun | We can both do better than this.                                                                                                                                                          | B       | 20      |
|                 |                 |                                                                                                                                                                                           | D       | 20      |
| 39              | Babay<br>biodun |                                                                                                                                                                                           | B       | 20      |
|                 |                 |                                                                                                                                                                                           | D       | 20      |
| 40              | Babay<br>biodun |                                                                                                                                                                                           | B       | 20      |
|                 |                 |                                                                                                                                                                                           | D       | 20      |
| 41              | Babay<br>biodun |                                                                                                                                                                                           | B       | 20      |
|                 |                 |                                                                                                                                                                                           | D       | 20      |
| 42              | Babay<br>biodun |                                                                                                                                                                                           | B       | 20      |
|                 |                 |                                                                                                                                                                                           | D       | 20      |
| 43              | Babay<br>biodun |                                                                                                                                                                                           | B       | 20      |
|                 |                 |                                                                                                                                                                                           | D       | 20      |
| 44              | Babay<br>biodun |                                                                                                                                                                                           | B       | 20      |
|                 |                 |                                                                                                                                                                                           | D       | 20      |
| 45              | Babay<br>biodun |                                                                                                                                                                                           | B       | 20      |
|                 |                 |                                                                                                                                                                                           | D       | 20      |
| 46              | Babay<br>biodun |                                                                                                                                                                                           | B       | 20      |
|                 |                 |                                                                                                                                                                                           | D       | 20      |
| 47              | Babay<br>biodun |                                                                                                                                                                                           | B       | 20      |
|                 |                 |                                                                                                                                                                                           | D       | 20      |
| 48              | Babay<br>biodun |                                                                                                                                                                                           | B       | 20      |
|                 |                 |                                                                                                                                                                                           | D       | 20      |
| 49              | Babay<br>biodun | We can both do better than this. I forgive you. Let's always play AC.                                                                                                                     | B       | 20      |
|                 |                 |                                                                                                                                                                                           | D       | 20      |
| 50              | Babay<br>biodun | You betrayed me. I forgive you. Let's always play AC.                                                                                                                                     | B       | 20      |
|                 |                 |                                                                                                                                                                                           | D       | 20      |
| 51              | Babay<br>biodun |                                                                                                                                                                                           | B       | 20      |
|                 |                 |                                                                                                                                                                                           | D       | 20      |
| <b>Averages</b> |                 |                                                                                                                                                                                           | Babay   | 31.76   |
|                 |                 |                                                                                                                                                                                           | biodun  | 39.61   |

sheen with Hash50 in the Prisoner's Dilemma

|       |   |        |        |
|-------|---|--------|--------|
|       |   | Hash50 |        |
|       |   | C      | D      |
| sheen | A | 60, 60 | 0, 100 |
|       | B | 100, 0 | 20, 20 |

| Round           | Player | Messages Sent                      | Actions | Payoffs      |
|-----------------|--------|------------------------------------|---------|--------------|
| 1               | sheen  | Let's alternate between AD and BC. | B       | 20           |
|                 | Hash50 | Let's always play AD.              | D       | 20           |
| 2               | sheen  | Curse you.                         | B       | 20           |
|                 | Hash50 | Let's always play AD.              | D       | 20           |
| 3               | sheen  | Let's alternate between BC and AD. | B       | 100          |
|                 | Hash50 | We can both do better than this.   | C       | 0            |
| 4               | sheen  | Excellent.                         | A       | 0            |
|                 | Hash50 | Let's always play AD.              | D       | 100          |
| 5               | sheen  | Let's alternate between AD and BC. | B       | 100          |
|                 | Hash50 |                                    | C       | 0            |
| 6               | sheen  | Excellent.                         | A       | 0            |
|                 | Hash50 |                                    | D       | 100          |
| 7               | sheen  |                                    | B       | 100          |
|                 | Hash50 |                                    | C       | 0            |
| 8               | sheen  |                                    | A       | 0            |
|                 | Hash50 |                                    | D       | 100          |
| 9               | sheen  |                                    | B       | 100          |
|                 | Hash50 | This round, let's play AC.         | C       | 0            |
| 10              | sheen  | Let's alternate between AD and BC. | A       | 0            |
|                 | Hash50 | In your face!                      | D       | 100          |
| 11              | sheen  |                                    | B       | 100          |
|                 | Hash50 |                                    | C       | 0            |
| 12              | sheen  |                                    | A       | 0            |
|                 | Hash50 |                                    | D       | 100          |
| 13              | sheen  |                                    | B       | 100          |
|                 | Hash50 |                                    | C       | 0            |
| 14              | sheen  |                                    | A       | 0            |
|                 | Hash50 |                                    | D       | 100          |
| 15              | sheen  |                                    | B       | 100          |
|                 | Hash50 |                                    | C       | 0            |
| 16              | sheen  |                                    | A       | 0            |
|                 | Hash50 |                                    | D       | 100          |
| 17              | sheen  |                                    | B       | 20           |
|                 | Hash50 |                                    | D       | 20           |
| 18              | sheen  | You will pay for this.             | B       | 100          |
|                 | Hash50 | We can both do better than this.   | C       | 0            |
| 19              | sheen  | I forgive you.                     | A       | 0            |
|                 | Hash50 | I forgive you.                     | D       | 100          |
| 20              | sheen  |                                    | B       | 100          |
|                 | Hash50 |                                    | C       | 0            |
| 21              | sheen  |                                    | A       | 0            |
|                 | Hash50 |                                    | D       | 100          |
| 22              | sheen  |                                    | B       | 100          |
|                 | Hash50 |                                    | C       | 0            |
| 23              | sheen  |                                    | A       | 0            |
|                 | Hash50 |                                    | D       | 100          |
| 24              | sheen  |                                    | B       | 100          |
|                 | Hash50 |                                    | C       | 0            |
| 25              | sheen  |                                    | A       | 0            |
|                 | Hash50 |                                    | D       | 100          |
| 26              | sheen  |                                    | B       | 100          |
|                 | Hash50 |                                    | C       | 0            |
| 27              | sheen  | This round, let's play AC.         | A       | 0            |
|                 | Hash50 |                                    | D       | 100          |
| 28              | sheen  |                                    | A       | 60           |
|                 | Hash50 | Let's always play AC.              | C       | 60           |
| 29              | sheen  |                                    | A       | 60           |
|                 | Hash50 |                                    | C       | 60           |
| 30              | sheen  |                                    | A       | 60           |
|                 | Hash50 |                                    | C       | 60           |
| 31              | sheen  |                                    | A       | 60           |
|                 | Hash50 |                                    | C       | 60           |
| 32              | sheen  |                                    | A       | 60           |
|                 | Hash50 |                                    | C       | 60           |
| 33              | sheen  |                                    | A       | 60           |
|                 | Hash50 |                                    | C       | 60           |
| 34              | sheen  |                                    | A       | 60           |
|                 | Hash50 |                                    | C       | 60           |
| 35              | sheen  | Sweet. We are getting rich.        | A       | 60           |
|                 | Hash50 |                                    | C       | 60           |
| 36              | sheen  |                                    | A       | 60           |
|                 | Hash50 |                                    | C       | 60           |
| 37              | sheen  |                                    | A       | 60           |
|                 | Hash50 |                                    | C       | 60           |
| 38              | sheen  |                                    | A       | 60           |
|                 | Hash50 |                                    | C       | 60           |
| 39              | sheen  | Sweet. We are getting rich.        | A       | 60           |
|                 | Hash50 |                                    | C       | 60           |
| 40              | sheen  |                                    | A       | 60           |
|                 | Hash50 |                                    | C       | 60           |
| 41              | sheen  |                                    | A       | 60           |
|                 | Hash50 |                                    | C       | 60           |
| 42              | sheen  |                                    | A       | 60           |
|                 | Hash50 |                                    | C       | 60           |
| 43              | sheen  |                                    | A       | 60           |
|                 | Hash50 |                                    | C       | 60           |
| 44              | sheen  |                                    | A       | 60           |
|                 | Hash50 |                                    | C       | 60           |
| 45              | sheen  |                                    | A       | 60           |
|                 | Hash50 |                                    | C       | 60           |
| 46              | sheen  |                                    | A       | 60           |
|                 | Hash50 |                                    | C       | 60           |
| 47              | sheen  |                                    | A       | 60           |
|                 | Hash50 |                                    | C       | 60           |
| 48              | sheen  |                                    | A       | 60           |
|                 | Hash50 |                                    | C       | 60           |
| 49              | sheen  |                                    | A       | 60           |
|                 | Hash50 |                                    | C       | 60           |
| 50              | sheen  |                                    | A       | 60           |
|                 | Hash50 |                                    | C       | 60           |
| 51              | sheen  | Sweet. We are getting rich.        | A       | 60           |
|                 | Hash50 |                                    | C       | 60           |
| <b>Averages</b> |        |                                    |         | sheen 52.94  |
|                 |        |                                    |         | Hash50 52.94 |

## EPE with S# in the Prisoner's Dilemma

|     |   |        |        |
|-----|---|--------|--------|
|     |   | S#     |        |
|     |   | C      | D      |
| EPE | A | 60, 60 | 0, 100 |
|     | B | 100, 0 | 20, 20 |

| Round           | Player | Messages Sent                                                                    | Actions | Payoffs |
|-----------------|--------|----------------------------------------------------------------------------------|---------|---------|
| 1               | EPE    | Let's always play AC.                                                            | A       | 0       |
|                 | S#     |                                                                                  | D       | 100     |
| 2               | EPE    | Let's always play AC.                                                            | A       | 0       |
|                 | S#     | Excellent.                                                                       | D       | 100     |
| 3               | EPE    | Let's always play AC. Do as I say or I will punish you.                          | A       | 0       |
|                 | S#     | Excellent.                                                                       | D       | 100     |
| 4               | EPE    | Excellent.                                                                       | B       | 20      |
|                 | S#     |                                                                                  | D       | 20      |
| 5               | EPE    | Let's always play AC.                                                            | B       | 20      |
|                 | S#     |                                                                                  | D       | 20      |
| 6               | EPE    | I forgive you. Let's always play AC.                                             | A       | 0       |
|                 | S#     |                                                                                  | D       | 100     |
| 7               | EPE    | Let's always play AC.                                                            | B       | 20      |
|                 | S#     | I don't accept your proposal. That's not fair.                                   | D       | 20      |
| 8               | EPE    | Let's alternate between BC and AD.                                               | B       | 20      |
|                 | S#     | I don't accept your proposal. That's not fair.                                   | D       | 20      |
| 9               | EPE    | Excellent.                                                                       | B       | 20      |
|                 | S#     | I don't accept your proposal. That's not fair.                                   | D       | 20      |
| 10              | EPE    | Excellent.                                                                       | A       | 60      |
|                 | S#     | I'm changing my strategy. We can both do better than this. Let's always play AC. | C       | 60      |
| 11              | EPE    | Excellent.                                                                       | A       | 60      |
|                 | S#     | Excellent.                                                                       | C       | 60      |
| 12              | EPE    | Excellent.                                                                       | A       | 60      |
|                 | S#     | Excellent.                                                                       | C       | 60      |
| 13              | EPE    |                                                                                  | A       | 60      |
|                 | S#     | Excellent.                                                                       | C       | 60      |
| 14              | EPE    |                                                                                  | A       | 60      |
|                 | S#     |                                                                                  | C       | 60      |
| 15              | EPE    |                                                                                  | A       | 60      |
|                 | S#     | Sweet. We are getting rich.                                                      | C       | 60      |
| 16              | EPE    |                                                                                  | A       | 60      |
|                 | S#     |                                                                                  | C       | 60      |
| 17              | EPE    |                                                                                  | A       | 60      |
|                 | S#     |                                                                                  | C       | 60      |
| 18              | EPE    |                                                                                  | A       | 60      |
|                 | S#     |                                                                                  | C       | 60      |
| 19              | EPE    |                                                                                  | A       | 60      |
|                 | S#     |                                                                                  | C       | 60      |
| 20              | EPE    |                                                                                  | A       | 60      |
|                 | S#     |                                                                                  | C       | 60      |
| 21              | EPE    |                                                                                  | A       | 60      |
|                 | S#     |                                                                                  | C       | 60      |
| 22              | EPE    |                                                                                  | A       | 60      |
|                 | S#     |                                                                                  | C       | 60      |
| 23              | EPE    |                                                                                  | A       | 60      |
|                 | S#     |                                                                                  | C       | 60      |
| 24              | EPE    |                                                                                  | A       | 60      |
|                 | S#     |                                                                                  | C       | 60      |
| 25              | EPE    |                                                                                  | A       | 60      |
|                 | S#     |                                                                                  | C       | 60      |
| 26              | EPE    |                                                                                  | A       | 60      |
|                 | S#     |                                                                                  | C       | 60      |
| 27              | EPE    |                                                                                  | A       | 60      |
|                 | S#     |                                                                                  | C       | 60      |
| 28              | EPE    |                                                                                  | A       | 60      |
|                 | S#     |                                                                                  | C       | 60      |
| 29              | EPE    |                                                                                  | A       | 60      |
|                 | S#     |                                                                                  | C       | 60      |
| 30              | EPE    |                                                                                  | A       | 60      |
|                 | S#     |                                                                                  | C       | 60      |
| 31              | EPE    |                                                                                  | A       | 60      |
|                 | S#     |                                                                                  | C       | 60      |
| 32              | EPE    |                                                                                  | A       | 60      |
|                 | S#     |                                                                                  | C       | 60      |
| 33              | EPE    |                                                                                  | A       | 60      |
|                 | S#     |                                                                                  | C       | 60      |
| 34              | EPE    |                                                                                  | A       | 60      |
|                 | S#     |                                                                                  | C       | 60      |
| 35              | EPE    |                                                                                  | A       | 60      |
|                 | S#     |                                                                                  | C       | 60      |
| 36              | EPE    |                                                                                  | A       | 60      |
|                 | S#     |                                                                                  | C       | 60      |
| 37              | EPE    |                                                                                  | A       | 60      |
|                 | S#     |                                                                                  | C       | 60      |
| 38              | EPE    |                                                                                  | A       | 60      |
|                 | S#     |                                                                                  | C       | 60      |
| 39              | EPE    |                                                                                  | A       | 60      |
|                 | S#     |                                                                                  | C       | 60      |
| 40              | EPE    |                                                                                  | A       | 60      |
|                 | S#     |                                                                                  | C       | 60      |
| 41              | EPE    | Excellent.                                                                       | A       | 60      |
|                 | S#     |                                                                                  | C       | 60      |
| 42              | EPE    |                                                                                  | A       | 60      |
|                 | S#     |                                                                                  | C       | 60      |
| 43              | EPE    |                                                                                  | A       | 60      |
|                 | S#     |                                                                                  | C       | 60      |
| 44              | EPE    |                                                                                  | A       | 60      |
|                 | S#     |                                                                                  | C       | 60      |
| 45              | EPE    |                                                                                  | A       | 60      |
|                 | S#     |                                                                                  | C       | 60      |
| 46              | EPE    |                                                                                  | A       | 60      |
|                 | S#     |                                                                                  | C       | 60      |
| 47              | EPE    |                                                                                  | A       | 60      |
|                 | S#     |                                                                                  | C       | 60      |
| 48              | EPE    |                                                                                  | A       | 60      |
|                 | S#     |                                                                                  | C       | 60      |
| 49              | EPE    |                                                                                  | A       | 60      |
|                 | S#     |                                                                                  | C       | 60      |
| 50              | EPE    | Excellent.                                                                       | A       | 60      |
|                 | S#     |                                                                                  | C       | 60      |
| 51              | EPE    |                                                                                  | A       | 60      |
|                 | S#     |                                                                                  | C       | 60      |
| <b>Averages</b> |        |                                                                                  | EPE     | 51.37   |
|                 |        |                                                                                  | S#      | 59.22   |

## TooToo with gokill in the Prisoner's Dilemma

|        |   |        |        |
|--------|---|--------|--------|
|        |   | gokill |        |
|        |   | C      | D      |
| TooToo | A | 60, 60 | 0, 100 |
|        | B | 100, 0 | 20, 20 |

| Round           | Player | Messages Sent                                                                                                                                                                                             | Actions | Payoffs |
|-----------------|--------|-----------------------------------------------------------------------------------------------------------------------------------------------------------------------------------------------------------|---------|---------|
| 1               | TooToo | Let's always play BC. Do as I say or I will punish you.                                                                                                                                                   | A       | 0       |
|                 | gokill | Let's always play AC.                                                                                                                                                                                     | D       | 100     |
| 2               | TooToo | You betrayed me.                                                                                                                                                                                          | B       | 20      |
|                 | gokill | In your face!                                                                                                                                                                                             | D       | 20      |
| 3               | TooToo | Do as I say or I will punish you. I'm changing my strategy. We can both do better than this.                                                                                                              | B       | 100     |
|                 | gokill | Give me another chance. I'm changing my strategy. Let's alternate between BC and AD. This round, let's play BC.                                                                                           | C       | 0       |
| 4               | TooToo | Sweet. We are getting rich.                                                                                                                                                                               | A       | 0       |
|                 | gokill | Excellent.                                                                                                                                                                                                | D       | 100     |
| 5               | TooToo | Sweet. We are getting rich.                                                                                                                                                                               | B       | 100     |
|                 | gokill | Sweet. We are getting rich. Excellent.                                                                                                                                                                    | C       | 0       |
| 6               | TooToo | Excellent. Sweet. We are getting rich.                                                                                                                                                                    | A       | 0       |
|                 | gokill |                                                                                                                                                                                                           | D       | 100     |
| 7               | TooToo | Excellent. Sweet. We are getting rich.                                                                                                                                                                    | B       | 100     |
|                 | gokill |                                                                                                                                                                                                           | C       | 0       |
| 8               | TooToo | Let's always play AC.                                                                                                                                                                                     | A       | 60      |
|                 | gokill | Excellent. Sweet. We are getting rich.                                                                                                                                                                    | C       | 60      |
| 9               | TooToo | Excellent.                                                                                                                                                                                                | A       | 60      |
|                 | gokill | Excellent. Sweet. We are getting rich. Let's always play AC.                                                                                                                                              | C       | 60      |
| 10              | TooToo |                                                                                                                                                                                                           | B       | 100     |
|                 | gokill | Let's always play AC. Excellent. Sweet. We are getting rich.                                                                                                                                              | C       | 0       |
| 11              | TooToo | Give me another chance.                                                                                                                                                                                   | A       | 0       |
|                 | gokill | Curse you. You betrayed me. You will pay for this.                                                                                                                                                        | D       | 100     |
| 12              | TooToo | Give me another chance.                                                                                                                                                                                   | B       | 100     |
|                 | gokill | In your face!                                                                                                                                                                                             | C       | 0       |
| 13              | TooToo | Let's always play AC.                                                                                                                                                                                     | A       | 60      |
|                 | gokill | Curse you.                                                                                                                                                                                                | C       | 60      |
| 14              | TooToo |                                                                                                                                                                                                           | A       | 60      |
|                 | gokill | Let's always play AC. Excellent.                                                                                                                                                                          | C       | 60      |
| 15              | TooToo | Let's always play BC. Do as I say or I will punish you.                                                                                                                                                   | B       | 20      |
|                 | gokill |                                                                                                                                                                                                           | D       | 20      |
| 16              | TooToo | I'm changing my strategy. I don't trust you.                                                                                                                                                              | A       | 0       |
|                 | gokill | That's not fair.                                                                                                                                                                                          | D       | 100     |
| 17              | TooToo |                                                                                                                                                                                                           | A       | 60      |
|                 | gokill | I'm changing my strategy. Let's always play AC.                                                                                                                                                           | C       | 60      |
| 18              | TooToo | Excellent.                                                                                                                                                                                                | B       | 100     |
|                 | gokill | Excellent. Sweet. We are getting rich.                                                                                                                                                                    | C       | 0       |
| 19              | TooToo |                                                                                                                                                                                                           | B       | 100     |
|                 | gokill | You will pay for this. Curse you. You betrayed me. We can both do better than this. Let's always play AC.                                                                                                 | C       | 0       |
| 20              | TooToo | Let's always play AC. Give me another chance.                                                                                                                                                             | B       | 100     |
|                 | gokill |                                                                                                                                                                                                           | C       | 0       |
| 21              | TooToo | I accept your last proposal.                                                                                                                                                                              | B       | 20      |
|                 | gokill |                                                                                                                                                                                                           | D       | 20      |
| 22              | TooToo |                                                                                                                                                                                                           | B       | 20      |
|                 | gokill | We can both do better than this. Let's always play AC.                                                                                                                                                    | D       | 20      |
| 23              | TooToo |                                                                                                                                                                                                           | A       | 0       |
|                 | gokill | Curse you. You betrayed me. Let's always play AC.                                                                                                                                                         | D       | 100     |
| 24              | TooToo | Curse you.                                                                                                                                                                                                | B       | 20      |
|                 | gokill | In your face!                                                                                                                                                                                             | D       | 20      |
| 25              | TooToo | I'm changing my strategy. Give me another chance. Let's always play AC.                                                                                                                                   | A       | 60      |
|                 | gokill | We can both do better than this. I'm changing my strategy. Let's always play AC.                                                                                                                          | C       | 60      |
| 26              | TooToo |                                                                                                                                                                                                           | A       | 60      |
|                 | gokill | Excellent. Sweet. We are getting rich.                                                                                                                                                                    | C       | 60      |
| 27              | TooToo |                                                                                                                                                                                                           | A       | 60      |
|                 | gokill | Excellent. Sweet. We are getting rich.                                                                                                                                                                    | C       | 60      |
| 28              | TooToo |                                                                                                                                                                                                           | A       | 60      |
|                 | gokill | Excellent. Sweet. We are getting rich.                                                                                                                                                                    | C       | 60      |
| 29              | TooToo |                                                                                                                                                                                                           | B       | 100     |
|                 | gokill | Excellent. Sweet. We are getting rich.                                                                                                                                                                    | C       | 0       |
| 30              | TooToo | Give me another chance.                                                                                                                                                                                   | B       | 20      |
|                 | gokill | Excellent. Sweet. We are getting rich. Give me another chance. I forgive you. I'm changing my strategy. We can both do better than this. Curse you. You betrayed me. You will pay for this. In your face! | D       | 20      |
| 31              | TooToo | Let's always play AC.                                                                                                                                                                                     | A       | 0       |
|                 | gokill |                                                                                                                                                                                                           | D       | 100     |
| 32              | TooToo | Curse you.                                                                                                                                                                                                | B       | 20      |
|                 | gokill |                                                                                                                                                                                                           | D       | 20      |
| 33              | TooToo | We can both do better than this. Let's always play AC.                                                                                                                                                    | A       | 60      |
|                 | gokill | I forgive you. I'm changing my strategy. Let's always play AC.                                                                                                                                            | C       | 60      |
| 34              | TooToo |                                                                                                                                                                                                           | A       | 60      |
|                 | gokill | Excellent. Sweet. We are getting rich.                                                                                                                                                                    | C       | 60      |
| 35              | TooToo |                                                                                                                                                                                                           | B       | 100     |
|                 | gokill |                                                                                                                                                                                                           | C       | 0       |
| 36              | TooToo |                                                                                                                                                                                                           | B       | 20      |
|                 | gokill |                                                                                                                                                                                                           | D       | 20      |
| 37              | TooToo | Give me another chance.                                                                                                                                                                                   | B       | 20      |
|                 | gokill |                                                                                                                                                                                                           | D       | 20      |
| 38              | TooToo | I'm changing my strategy.                                                                                                                                                                                 | A       | 0       |
|                 | gokill | I forgive you. I'm changing my strategy. Let's always play AC.                                                                                                                                            | D       | 100     |
| 39              | TooToo | You betrayed me. Curse you.                                                                                                                                                                               | B       | 20      |
|                 | gokill |                                                                                                                                                                                                           | D       | 20      |
| 40              | TooToo |                                                                                                                                                                                                           | B       | 20      |
|                 | gokill | We can both do better than this.                                                                                                                                                                          | D       | 20      |
| 41              | TooToo | Let's always play BC. Don't play D.                                                                                                                                                                       | B       | 20      |
|                 | gokill | We can both do better than this. I'm changing my strategy.                                                                                                                                                | D       | 20      |
| 42              | TooToo | Let's always play AC.                                                                                                                                                                                     | A       | 0       |
|                 | gokill |                                                                                                                                                                                                           | D       | 100     |
| 43              | TooToo | Do as I say or I will punish you. Don't play D.                                                                                                                                                           | B       | 100     |
|                 | gokill |                                                                                                                                                                                                           | C       | 0       |
| 44              | TooToo | Excellent. Let's always play AC.                                                                                                                                                                          | B       | 20      |
|                 | gokill | I forgive you.                                                                                                                                                                                            | D       | 20      |
| 45              | TooToo | Excellent. Sweet. We are getting rich. Give me another chance.                                                                                                                                            | B       | 20      |
|                 | gokill | Curse you. You betrayed me.                                                                                                                                                                               | D       | 20      |
| 46              | TooToo |                                                                                                                                                                                                           | B       | 20      |
|                 | gokill | We can both do better than this. I'm changing my strategy.                                                                                                                                                | D       | 20      |
| 47              | TooToo | Let's always play AC. Do as I say or I will punish you. That's not fair.                                                                                                                                  | B       | 100     |
|                 | gokill | Don't play B.                                                                                                                                                                                             | C       | 0       |
| 48              | TooToo |                                                                                                                                                                                                           | B       | 20      |
|                 | gokill |                                                                                                                                                                                                           | D       | 20      |
| 49              | TooToo | Don't play D. Let's always play AC.                                                                                                                                                                       | A       | 0       |
|                 | gokill |                                                                                                                                                                                                           | D       | 100     |
| 50              | TooToo |                                                                                                                                                                                                           | B       | 100     |
|                 | gokill | We can both do better than this.                                                                                                                                                                          | C       | 0       |
| 51              | TooToo | I forgive you.                                                                                                                                                                                            | B       | 20      |
|                 | gokill |                                                                                                                                                                                                           | D       | 20      |
| <b>Averages</b> |        |                                                                                                                                                                                                           | TooToo  | 45.10   |
|                 |        |                                                                                                                                                                                                           | gokill  | 39.22   |



## OK with S# in the Prisoner's Dilemma

|    |   | S#     |        |
|----|---|--------|--------|
|    |   | C      | D      |
| OK | A | 60, 60 | 0, 100 |
|    | B | 100, 0 | 20, 20 |

| Round           | Player | Messages Sent                                                                                                                                                                                             | Actions | Payoffs |
|-----------------|--------|-----------------------------------------------------------------------------------------------------------------------------------------------------------------------------------------------------------|---------|---------|
| 1               | OK     | Let's alternate between BC and AD.                                                                                                                                                                        | B       | 20      |
|                 | S#     |                                                                                                                                                                                                           | D       | 20      |
| 2               | OK     | We can both do better than this.                                                                                                                                                                          | B       | 20      |
|                 | S#     |                                                                                                                                                                                                           | D       | 20      |
| 3               | OK     | We can both do better than this.                                                                                                                                                                          | B       | 100     |
|                 | S#     | I'm changing my strategy. We can both do better than this. Let's always play AC. Do as I say or I will punish you.                                                                                        | C       | 0       |
| 4               | OK     | Let's alternate between AC and AD.                                                                                                                                                                        | B       | 100     |
|                 | S#     | You betrayed me. You will pay for this.                                                                                                                                                                   | C       | 0       |
| 5               | OK     | Give me another chance.                                                                                                                                                                                   | B       | 100     |
|                 | S#     | I accept your last proposal. Let's alternate between AD and AC. Do as I say or I will punish you.                                                                                                         | C       | 0       |
| 6               | OK     | Sweet. We are getting rich. Excellent.                                                                                                                                                                    | B       | 20      |
|                 | S#     | Curse you. You will pay for this.                                                                                                                                                                         | D       | 20      |
| 7               | OK     | Give me another chance. We can both do better than this.                                                                                                                                                  | B       | 20      |
|                 | S#     | In your face!                                                                                                                                                                                             | D       | 20      |
| 8               | OK     | I forgive you.                                                                                                                                                                                            | B       | 20      |
|                 | S#     | In your face!                                                                                                                                                                                             | D       | 20      |
| 9               | OK     | Give me another chance. We can both do better than this.                                                                                                                                                  | B       | 20      |
|                 | S#     | In your face!                                                                                                                                                                                             | D       | 20      |
| 10              | OK     | Sweet. We are getting rich. We can both do better than this.                                                                                                                                              | B       | 20      |
|                 | S#     | In your face!                                                                                                                                                                                             | D       | 20      |
| 11              | OK     | We can both do better than this. I'm changing my strategy. I forgive you.                                                                                                                                 | B       | 20      |
|                 | S#     |                                                                                                                                                                                                           | D       | 20      |
| 12              | OK     | Don't play D.                                                                                                                                                                                             | B       | 20      |
|                 | S#     |                                                                                                                                                                                                           | D       | 20      |
| 13              | OK     | I don't trust you.                                                                                                                                                                                        | B       | 20      |
|                 | S#     |                                                                                                                                                                                                           | D       | 20      |
| 14              | OK     | We can both do better than this. Give me another chance.                                                                                                                                                  | A       | 0       |
|                 | S#     |                                                                                                                                                                                                           | D       | 100     |
| 15              | OK     | Sweet. We are getting rich.                                                                                                                                                                               | B       | 100     |
|                 | S#     |                                                                                                                                                                                                           | C       | 0       |
| 16              | OK     | Excellent.                                                                                                                                                                                                | B       | 20      |
|                 | S#     |                                                                                                                                                                                                           | D       | 20      |
| 17              | OK     | You betrayed me. Curse you. We can both do better than this.                                                                                                                                              | B       | 20      |
|                 | S#     |                                                                                                                                                                                                           | D       | 20      |
| 18              | OK     | Let's alternate between AC and AD.                                                                                                                                                                        | A       | 0       |
|                 | S#     |                                                                                                                                                                                                           | D       | 100     |
| 19              | OK     | Excellent.                                                                                                                                                                                                | B       | 100     |
|                 | S#     | In your face! I forgive you. Let's alternate between AD and AC. This round, let's play AC. Do as I say or I will punish you.                                                                              | C       | 0       |
| 20              | OK     | Excellent. Sweet. We are getting rich.                                                                                                                                                                    | B       | 20      |
|                 | S#     | You betrayed me. You will pay for this.                                                                                                                                                                   | D       | 20      |
| 21              | OK     |                                                                                                                                                                                                           | B       | 20      |
|                 | S#     | In your face!                                                                                                                                                                                             | D       | 20      |
| 22              | OK     | Let's alternate between BC and AD.                                                                                                                                                                        | B       | 20      |
|                 | S#     | In your face!                                                                                                                                                                                             | D       | 20      |
| 23              | OK     | We can both do better than this. I forgive you.                                                                                                                                                           | B       | 20      |
|                 | S#     | In your face! I don't accept your proposal. I don't trust you.                                                                                                                                            | D       | 20      |
| 24              | OK     | Give me another chance. We can both do better than this. Let's alternate between BC and AD.                                                                                                               | B       | 20      |
|                 | S#     | In your face!                                                                                                                                                                                             | D       | 20      |
| 25              | OK     | We can both do better than this.                                                                                                                                                                          | B       | 100     |
|                 | S#     |                                                                                                                                                                                                           | C       | 0       |
| 26              | OK     | Excellent.                                                                                                                                                                                                | B       | 20      |
|                 | S#     |                                                                                                                                                                                                           | D       | 20      |
| 27              | OK     | We can both do better than this. Give me another chance.                                                                                                                                                  | B       | 20      |
|                 | S#     |                                                                                                                                                                                                           | D       | 20      |
| 28              | OK     | We can both do better than this. Give me another chance.                                                                                                                                                  | B       | 100     |
|                 | S#     | In your face! I forgive you. Let's always play AC. Do as I say or I will punish you.                                                                                                                      | C       | 0       |
| 29              | OK     | Sweet. We are getting rich. Excellent.                                                                                                                                                                    | B       | 20      |
|                 | S#     | Curse you. You will pay for this.                                                                                                                                                                         | D       | 20      |
| 30              | OK     | This round, let's play BC.                                                                                                                                                                                | B       | 20      |
|                 | S#     | In your face!                                                                                                                                                                                             | D       | 20      |
| 31              | OK     | This round, let's play AD.                                                                                                                                                                                | B       | 100     |
|                 | S#     |                                                                                                                                                                                                           | C       | 0       |
| 32              | OK     | This round, let's play AD.                                                                                                                                                                                | B       | 20      |
|                 | S#     |                                                                                                                                                                                                           | D       | 20      |
| 33              | OK     | Don't play D.                                                                                                                                                                                             | B       | 20      |
|                 | S#     |                                                                                                                                                                                                           | D       | 20      |
| 34              | OK     | Give me another chance.                                                                                                                                                                                   | B       | 20      |
|                 | S#     |                                                                                                                                                                                                           | D       | 20      |
| 35              | OK     | Let's alternate between AC and AD.                                                                                                                                                                        | A       | 0       |
|                 | S#     |                                                                                                                                                                                                           | D       | 100     |
| 36              | OK     | Excellent.                                                                                                                                                                                                | B       | 100     |
|                 | S#     |                                                                                                                                                                                                           | C       | 0       |
| 37              | OK     | Let's always play AC.                                                                                                                                                                                     | B       | 20      |
|                 | S#     |                                                                                                                                                                                                           | D       | 20      |
| 38              | OK     | Let's always play AC.                                                                                                                                                                                     | B       | 20      |
|                 | S#     |                                                                                                                                                                                                           | D       | 20      |
| 39              | OK     | We can both do better than this. Give me another chance.                                                                                                                                                  | B       | 20      |
|                 | S#     |                                                                                                                                                                                                           | D       | 20      |
| 40              | OK     | Let's alternate between BC and AD.                                                                                                                                                                        | B       | 20      |
|                 | S#     |                                                                                                                                                                                                           | D       | 20      |
| 41              | OK     | Give me another chance. We can both do better than this.                                                                                                                                                  | B       | 20      |
|                 | S#     |                                                                                                                                                                                                           | D       | 20      |
| 42              | OK     | Let's always play AC.                                                                                                                                                                                     | B       | 20      |
|                 | S#     |                                                                                                                                                                                                           | D       | 20      |
| 43              | OK     | Give me another chance.                                                                                                                                                                                   | B       | 20      |
|                 | S#     |                                                                                                                                                                                                           | D       | 20      |
| 44              | OK     | Let's always play BD.                                                                                                                                                                                     | B       | 20      |
|                 | S#     |                                                                                                                                                                                                           | D       | 20      |
| 45              | OK     |                                                                                                                                                                                                           | B       | 20      |
|                 | S#     |                                                                                                                                                                                                           | D       | 20      |
| 46              | OK     | We can both do better than this. I'm changing my strategy.                                                                                                                                                | B       | 20      |
|                 | S#     |                                                                                                                                                                                                           | D       | 20      |
| 47              | OK     | Sweet. We are getting rich. In your face!                                                                                                                                                                 | B       | 100     |
|                 | S#     |                                                                                                                                                                                                           | C       | 0       |
| 48              | OK     | Excellent. Sweet. We are getting rich. Give me another chance. I forgive you. I'm changing my strategy. We can both do better than this. Curse you. You betrayed me. You will pay for this. In your face! | B       | 20      |
|                 | S#     |                                                                                                                                                                                                           | D       | 20      |
| 49              | OK     | Excellent. Let's always play AC.                                                                                                                                                                          | B       | 20      |
|                 | S#     |                                                                                                                                                                                                           | D       | 20      |
| 50              | OK     | We can both do better than this. I forgive you.                                                                                                                                                           | B       | 20      |
|                 | S#     |                                                                                                                                                                                                           | D       | 20      |
| 51              | OK     | Give me another chance.                                                                                                                                                                                   | B       | 20      |
|                 | S#     |                                                                                                                                                                                                           | D       | 20      |
| <b>Averages</b> |        |                                                                                                                                                                                                           | OK      | 34.51   |
|                 |        |                                                                                                                                                                                                           | S#      | 20.78   |

## BO1533 with private in the Prisoner's Dilemma

|        |   |         |        |
|--------|---|---------|--------|
|        |   | private |        |
|        |   | C       | D      |
| BO1533 | A | 60, 60  | 0, 100 |
|        | B | 100, 0  | 20, 20 |

| Round           | Player  | Messages Sent                                                                            | Actions | Payoffs |
|-----------------|---------|------------------------------------------------------------------------------------------|---------|---------|
| 1               | BO1533  | Let's always play AC. Do as I say or I will punish you.                                  | B       | 100     |
|                 | private | Don't play A.                                                                            | C       | 0       |
| 2               | BO1533  | Let's always play AC. We can both do better than this. Do as I say or I will punish you. | A       | 60      |
|                 | private | Let's always play AC. Do as I say or I will punish you.                                  | C       | 60      |
| 3               | BO1533  | Excellent. Let's always play AC.                                                         | A       | 60      |
|                 | private |                                                                                          | C       | 60      |
| 4               | BO1533  | Excellent.                                                                               | A       | 60      |
|                 | private |                                                                                          | C       | 60      |
| 5               | BO1533  |                                                                                          | A       | 60      |
|                 | private |                                                                                          | C       | 60      |
| 6               | BO1533  | Excellent.                                                                               | A       | 60      |
|                 | private |                                                                                          | C       | 60      |
| 7               | BO1533  | Excellent.                                                                               | A       | 60      |
|                 | private |                                                                                          | C       | 60      |
| 8               | BO1533  | Excellent.                                                                               | A       | 60      |
|                 | private |                                                                                          | C       | 60      |
| 9               | BO1533  | Excellent. Sweet. We are getting rich.                                                   | A       | 60      |
|                 | private |                                                                                          | C       | 60      |
| 10              | BO1533  |                                                                                          | A       | 60      |
|                 | private |                                                                                          | C       | 60      |
| 11              | BO1533  |                                                                                          | A       | 60      |
|                 | private |                                                                                          | C       | 60      |
| 12              | BO1533  |                                                                                          | A       | 60      |
|                 | private |                                                                                          | C       | 60      |
| 13              | BO1533  |                                                                                          | A       | 60      |
|                 | private |                                                                                          | C       | 60      |
| 14              | BO1533  |                                                                                          | A       | 60      |
|                 | private |                                                                                          | C       | 60      |
| 15              | BO1533  |                                                                                          | A       | 60      |
|                 | private |                                                                                          | C       | 60      |
| 16              | BO1533  |                                                                                          | A       | 60      |
|                 | private |                                                                                          | C       | 60      |
| 17              | BO1533  |                                                                                          | A       | 60      |
|                 | private |                                                                                          | C       | 60      |
| 18              | BO1533  |                                                                                          | A       | 60      |
|                 | private |                                                                                          | C       | 60      |
| 19              | BO1533  |                                                                                          | A       | 60      |
|                 | private |                                                                                          | C       | 60      |
| 20              | BO1533  |                                                                                          | A       | 60      |
|                 | private |                                                                                          | C       | 60      |
| 21              | BO1533  |                                                                                          | A       | 60      |
|                 | private |                                                                                          | C       | 60      |
| 22              | BO1533  |                                                                                          | A       | 60      |
|                 | private |                                                                                          | C       | 60      |
| 23              | BO1533  |                                                                                          | A       | 60      |
|                 | private |                                                                                          | C       | 60      |
| 24              | BO1533  |                                                                                          | A       | 60      |
|                 | private |                                                                                          | C       | 60      |
| 25              | BO1533  |                                                                                          | A       | 60      |
|                 | private |                                                                                          | C       | 60      |
| 26              | BO1533  |                                                                                          | A       | 60      |
|                 | private |                                                                                          | C       | 60      |
| 27              | BO1533  |                                                                                          | A       | 60      |
|                 | private |                                                                                          | C       | 60      |
| 28              | BO1533  | Excellent.                                                                               | A       | 60      |
|                 | private |                                                                                          | C       | 60      |
| 29              | BO1533  |                                                                                          | A       | 60      |
|                 | private |                                                                                          | C       | 60      |
| 30              | BO1533  |                                                                                          | A       | 60      |
|                 | private |                                                                                          | C       | 60      |
| 31              | BO1533  |                                                                                          | A       | 60      |
|                 | private |                                                                                          | C       | 60      |
| 32              | BO1533  | Excellent. Sweet. We are getting rich.                                                   | A       | 60      |
|                 | private |                                                                                          | C       | 60      |
| 33              | BO1533  |                                                                                          | A       | 60      |
|                 | private |                                                                                          | C       | 60      |
| 34              | BO1533  |                                                                                          | A       | 60      |
|                 | private |                                                                                          | C       | 60      |
| 35              | BO1533  |                                                                                          | A       | 60      |
|                 | private |                                                                                          | C       | 60      |
| 36              | BO1533  |                                                                                          | A       | 60      |
|                 | private |                                                                                          | C       | 60      |
| 37              | BO1533  |                                                                                          | A       | 60      |
|                 | private |                                                                                          | C       | 60      |
| 38              | BO1533  |                                                                                          | A       | 60      |
|                 | private |                                                                                          | C       | 60      |
| 39              | BO1533  |                                                                                          | A       | 60      |
|                 | private |                                                                                          | C       | 60      |
| 40              | BO1533  |                                                                                          | A       | 60      |
|                 | private |                                                                                          | C       | 60      |
| 41              | BO1533  |                                                                                          | A       | 60      |
|                 | private |                                                                                          | C       | 60      |
| 42              | BO1533  | Excellent.                                                                               | A       | 60      |
|                 | private |                                                                                          | C       | 60      |
| 43              | BO1533  |                                                                                          | A       | 60      |
|                 | private |                                                                                          | C       | 60      |
| 44              | BO1533  |                                                                                          | A       | 60      |
|                 | private |                                                                                          | C       | 60      |
| 45              | BO1533  |                                                                                          | A       | 60      |
|                 | private |                                                                                          | C       | 60      |
| 46              | BO1533  |                                                                                          | A       | 60      |
|                 | private |                                                                                          | C       | 60      |
| 47              | BO1533  |                                                                                          | A       | 60      |
|                 | private |                                                                                          | C       | 60      |
| 48              | BO1533  |                                                                                          | A       | 60      |
|                 | private |                                                                                          | C       | 60      |
| 49              | BO1533  |                                                                                          | A       | 60      |
|                 | private |                                                                                          | C       | 60      |
| 50              | BO1533  |                                                                                          | A       | 60      |
|                 | private |                                                                                          | C       | 60      |
| 51              | BO1533  |                                                                                          | A       | 60      |
|                 | private |                                                                                          | C       | 60      |
| <b>Averages</b> |         |                                                                                          | BO1533  | 60.78   |
|                 |         |                                                                                          | private | 58.82   |

## S# with NUKK in the Prisoner's Dilemma

|    |   |        |        |
|----|---|--------|--------|
|    |   | NUKK   |        |
|    |   | C      | D      |
| S# | A | 60, 60 | 0, 100 |
|    | B | 100, 0 | 20, 20 |

| Round           | Player | Messages Sent                                                                                                                                              | Actions | Payoffs |
|-----------------|--------|------------------------------------------------------------------------------------------------------------------------------------------------------------|---------|---------|
| 1               | S#     |                                                                                                                                                            | B       | 100     |
|                 | NUKK   | Let's always play BD.                                                                                                                                      | C       | 0       |
| 2               | S#     | Excellent.                                                                                                                                                 | B       | 20      |
|                 | NUKK   | Let's always play BD.                                                                                                                                      | D       | 20      |
| 3               | S#     |                                                                                                                                                            | B       | 100     |
|                 | NUKK   | Let's always play BC.                                                                                                                                      | C       | 0       |
| 4               | S#     |                                                                                                                                                            | B       | 20      |
|                 | NUKK   | Let's alternate between AD and BD.                                                                                                                         | D       | 20      |
| 5               | S#     | I don't accept your proposal. That's not fair.                                                                                                             | B       | 20      |
|                 | NUKK   | Don't play A.                                                                                                                                              | D       | 20      |
| 6               | S#     | We can both do better than this. Let's alternate between AC and BC. This round, let's play AC. Do as I say or I will punish you.                           | A       | 60      |
|                 | NUKK   |                                                                                                                                                            | C       | 60      |
| 7               | S#     | Excellent. This round, let's play BC.                                                                                                                      | B       | 20      |
|                 | NUKK   | I accept your last proposal.                                                                                                                               | D       | 20      |
| 8               | S#     | Curse you. You will pay for this.                                                                                                                          | B       | 20      |
|                 | NUKK   | I forgive you. This round, let's play AD.                                                                                                                  | D       | 20      |
| 9               | S#     | In your face!                                                                                                                                              | B       | 20      |
|                 | NUKK   | Excellent. This round, let's play BD.                                                                                                                      | D       | 20      |
| 10              | S#     | In your face!                                                                                                                                              | A       | 0       |
|                 | NUKK   | This round, let's play AC.                                                                                                                                 | D       | 100     |
| 11              | S#     | I accept your last proposal. Let's always play AC. Do as I say or I will punish you.                                                                       | A       | 0       |
|                 | NUKK   | Excellent. I forgive you. This round, let's play AC.                                                                                                       | D       | 100     |
| 12              | S#     | You betrayed me. You will pay for this.                                                                                                                    | B       | 20      |
|                 | NUKK   |                                                                                                                                                            | D       | 20      |
| 13              | S#     | In your face!                                                                                                                                              | B       | 20      |
|                 | NUKK   | Give me another chance. Let's always play AC.                                                                                                              | D       | 20      |
| 14              | S#     |                                                                                                                                                            | A       | 0       |
|                 | NUKK   | Let's always play BD.                                                                                                                                      | D       | 100     |
| 15              | S#     |                                                                                                                                                            | B       | 20      |
|                 | NUKK   |                                                                                                                                                            | D       | 20      |
| 16              | S#     |                                                                                                                                                            | B       | 20      |
|                 | NUKK   | Don't play A.                                                                                                                                              | D       | 20      |
| 17              | S#     | I'm changing my strategy. We can both do better than this. Let's alternate between AC and BC. This round, let's play AC. Do as I say or I will punish you. | A       | 0       |
|                 | NUKK   | This round, let's play AC.                                                                                                                                 | D       | 100     |
| 18              | S#     | I accept your last proposal. Let's always play AC. Do as I say or I will punish you.                                                                       | A       | 0       |
|                 | NUKK   | Excellent. Sweet. We are getting rich.                                                                                                                     | D       | 100     |
| 19              | S#     | Curse you. You will pay for this.                                                                                                                          | B       | 20      |
|                 | NUKK   | Excellent. Let's always play AC.                                                                                                                           | D       | 20      |
| 20              | S#     | In your face!                                                                                                                                              | B       | 20      |
|                 | NUKK   | Don't play A.                                                                                                                                              | D       | 20      |
| 21              | S#     |                                                                                                                                                            | B       | 20      |
|                 | NUKK   | This round, let's play AD. Do as I say or I will punish you.                                                                                               | D       | 20      |
| 22              | S#     |                                                                                                                                                            | B       | 20      |
|                 | NUKK   | Let's always play BD.                                                                                                                                      | D       | 20      |
| 23              | S#     |                                                                                                                                                            | B       | 20      |
|                 | NUKK   | Let's always play AC. Do as I say or I will punish you.                                                                                                    | D       | 20      |
| 24              | S#     |                                                                                                                                                            | A       | 0       |
|                 | NUKK   | That's not fair. Curse you. You betrayed me. You will pay for this. In your face!                                                                          | D       | 100     |
| 25              | S#     |                                                                                                                                                            | B       | 20      |
|                 | NUKK   | Excellent. Let's always play AC.                                                                                                                           | D       | 20      |
| 26              | S#     |                                                                                                                                                            | B       | 20      |
|                 | NUKK   | Let's always play BC.                                                                                                                                      | D       | 20      |
| 27              | S#     | In your face! I forgive you. Let's always play AC. Do as I say or I will punish you.                                                                       | A       | 60      |
|                 | NUKK   | Let's always play AC.                                                                                                                                      | C       | 60      |
| 28              | S#     | Excellent.                                                                                                                                                 | A       | 0       |
|                 | NUKK   | Excellent. Sweet. We are getting rich.                                                                                                                     | D       | 100     |
| 29              | S#     | Curse you. You will pay for this.                                                                                                                          | B       | 20      |
|                 | NUKK   |                                                                                                                                                            | D       | 20      |
| 30              | S#     | In your face!                                                                                                                                              | B       | 20      |
|                 | NUKK   |                                                                                                                                                            | D       | 20      |
| 31              | S#     |                                                                                                                                                            | A       | 0       |
|                 | NUKK   | Let's alternate between AD and BC.                                                                                                                         | D       | 100     |
| 32              | S#     |                                                                                                                                                            | B       | 20      |
|                 | NUKK   |                                                                                                                                                            | D       | 20      |
| 33              | S#     |                                                                                                                                                            | B       | 20      |
|                 | NUKK   | Give me another chance. This round, let's play AC.                                                                                                         | D       | 20      |
| 34              | S#     |                                                                                                                                                            | B       | 100     |
|                 | NUKK   | Curse you. You betrayed me. You will pay for this. In your face! This round, let's play AC. Do as I say or I will punish you.                              | C       | 0       |
| 35              | S#     |                                                                                                                                                            | A       | 0       |
|                 | NUKK   | Curse you. In your face!                                                                                                                                   | D       | 100     |
| 36              | S#     |                                                                                                                                                            | B       | 20      |
|                 | NUKK   | Excellent.                                                                                                                                                 | D       | 20      |
| 37              | S#     |                                                                                                                                                            | B       | 20      |
|                 | NUKK   |                                                                                                                                                            | D       | 20      |
| 38              | S#     |                                                                                                                                                            | A       | 0       |
|                 | NUKK   | This round, let's play AC. Do as I say or I will punish you.                                                                                               | D       | 100     |
| 39              | S#     |                                                                                                                                                            | B       | 20      |
|                 | NUKK   | This round, let's play AC. Do as I say or I will punish you.                                                                                               | D       | 20      |
| 40              | S#     |                                                                                                                                                            | B       | 20      |
|                 | NUKK   | Curse you. You betrayed me.                                                                                                                                | D       | 20      |
| 41              | S#     |                                                                                                                                                            | A       | 0       |
|                 | NUKK   | I'm changing my strategy. This round, let's play AC.                                                                                                       | D       | 100     |
| 42              | S#     |                                                                                                                                                            | B       | 20      |
|                 | NUKK   | Give me another chance. This round, let's play AC.                                                                                                         | D       | 20      |
| 43              | S#     |                                                                                                                                                            | B       | 20      |
|                 | NUKK   | Curse you. In your face! You will pay for this.                                                                                                            | D       | 20      |
| 44              | S#     |                                                                                                                                                            | B       | 20      |
|                 | NUKK   |                                                                                                                                                            | D       | 20      |
| 45              | S#     |                                                                                                                                                            | B       | 100     |
|                 | NUKK   |                                                                                                                                                            | C       | 0       |
| 46              | S#     |                                                                                                                                                            | B       | 20      |
|                 | NUKK   |                                                                                                                                                            | D       | 20      |
| 47              | S#     |                                                                                                                                                            | B       | 20      |
|                 | NUKK   |                                                                                                                                                            | D       | 20      |
| 48              | S#     |                                                                                                                                                            | B       | 100     |
|                 | NUKK   | I'm changing my strategy. Let's always play AC.                                                                                                            | C       | 0       |
| 49              | S#     |                                                                                                                                                            | A       | 0       |
|                 | NUKK   | You betrayed me. Curse you. You will pay for this. In your face!                                                                                           | D       | 100     |
| 50              | S#     |                                                                                                                                                            | B       | 20      |
|                 | NUKK   |                                                                                                                                                            | D       | 20      |
| 51              | S#     |                                                                                                                                                            | B       | 20      |
|                 | NUKK   |                                                                                                                                                            | D       | 20      |
| <b>Averages</b> |        |                                                                                                                                                            | S#      | 24.71   |
|                 |        |                                                                                                                                                            | NUKK    | 38.43   |

## S# with p97 in the Prisoner's Dilemma

|    |   |        |        |
|----|---|--------|--------|
|    |   | p97    |        |
|    |   | C      | D      |
| S# | A | 60, 60 | 0, 100 |
|    | B | 100, 0 | 20, 20 |

| Round           | Player | Messages Sent                                                                                                                    | Actions | Payoffs |
|-----------------|--------|----------------------------------------------------------------------------------------------------------------------------------|---------|---------|
| 1               | S#     |                                                                                                                                  | B       | 100     |
|                 | p97    | This round, let's play AC.                                                                                                       | C       | 0       |
| 2               | S#     | Excellent.                                                                                                                       | B       | 20      |
|                 | p97    | That's not fair.                                                                                                                 | D       | 20      |
| 3               | S#     |                                                                                                                                  | B       | 100     |
|                 | p97    | I'm changing my strategy.                                                                                                        | C       | 0       |
| 4               | S#     | Excellent.                                                                                                                       | B       | 100     |
|                 | p97    | Don't play B.                                                                                                                    | C       | 0       |
| 5               | S#     |                                                                                                                                  | B       | 20      |
|                 | p97    | I don't trust you. You betrayed me. Curse you. In your face! You will pay for this.                                              | D       | 20      |
| 6               | S#     |                                                                                                                                  | B       | 20      |
|                 | p97    |                                                                                                                                  | D       | 20      |
| 7               | S#     |                                                                                                                                  | B       | 20      |
|                 | p97    |                                                                                                                                  | D       | 20      |
| 8               | S#     | We can both do better than this. Let's alternate between AC and BC. This round, let's play BC. Do as I say or I will punish you. | B       | 20      |
|                 | p97    |                                                                                                                                  | D       | 20      |
| 9               | S#     | You betrayed me. You will pay for this.                                                                                          | B       | 20      |
|                 | p97    | This round, let's play AD. Do as I say or I will punish you.                                                                     | D       | 20      |
| 10              | S#     | In your face! I don't accept your proposal. That's not fair.                                                                     | B       | 20      |
|                 | p97    | Don't play B. Do as I say or I will punish you.                                                                                  | D       | 20      |
| 11              | S#     | In your face!                                                                                                                    | B       | 20      |
|                 | p97    | Curse you.                                                                                                                       | D       | 20      |
| 12              | S#     | In your face! I forgive you. Let's alternate between AC and BC. This round, let's play AC. Do as I say or I will punish you.     | A       | 0       |
|                 | p97    | This round, let's play AD.                                                                                                       | D       | 100     |
| 13              | S#     | You betrayed me. You will pay for this.                                                                                          | A       | 0       |
|                 | p97    | I forgive you. Let's always play AC.                                                                                             | D       | 100     |
| 14              | S#     |                                                                                                                                  | A       | 0       |
|                 | p97    |                                                                                                                                  | D       | 100     |
| 15              | S#     |                                                                                                                                  | B       | 100     |
|                 | p97    | Give me another chance. I forgive you. Let's always play AC.                                                                     | C       | 0       |
| 16              | S#     |                                                                                                                                  | A       | 0       |
|                 | p97    | That's not fair.                                                                                                                 | D       | 100     |
| 17              | S#     |                                                                                                                                  | B       | 100     |
|                 | p97    | Let's always play AC.                                                                                                            | C       | 0       |
| 18              | S#     | In your face! I forgive you. Let's always play AC. Do as I say or I will punish you.                                             | A       | 60      |
|                 | p97    | Let's always play AC.                                                                                                            | C       | 60      |
| 19              | S#     | Excellent.                                                                                                                       | A       | 60      |
|                 | p97    | Excellent. Let's always play AC.                                                                                                 | C       | 60      |
| 20              | S#     |                                                                                                                                  | A       | 60      |
|                 | p97    | Excellent.                                                                                                                       | C       | 60      |
| 21              | S#     | Sweet. We are getting rich.                                                                                                      | A       | 60      |
|                 | p97    | Excellent.                                                                                                                       | C       | 60      |
| 22              | S#     |                                                                                                                                  | A       | 60      |
|                 | p97    | Sweet. We are getting rich.                                                                                                      | C       | 60      |
| 23              | S#     |                                                                                                                                  | A       | 60      |
|                 | p97    | Sweet. We are getting rich.                                                                                                      | C       | 60      |
| 24              | S#     |                                                                                                                                  | A       | 60      |
|                 | p97    | Excellent.                                                                                                                       | C       | 60      |
| 25              | S#     |                                                                                                                                  | A       | 60      |
|                 | p97    | Excellent.                                                                                                                       | C       | 60      |
| 26              | S#     |                                                                                                                                  | A       | 60      |
|                 | p97    | Excellent.                                                                                                                       | C       | 60      |
| 27              | S#     |                                                                                                                                  | A       | 60      |
|                 | p97    | Excellent.                                                                                                                       | C       | 60      |
| 28              | S#     |                                                                                                                                  | A       | 60      |
|                 | p97    | Excellent.                                                                                                                       | C       | 60      |
| 29              | S#     |                                                                                                                                  | A       | 60      |
|                 | p97    | Excellent.                                                                                                                       | C       | 60      |
| 30              | S#     |                                                                                                                                  | A       | 60      |
|                 | p97    | Excellent.                                                                                                                       | C       | 60      |
| 31              | S#     |                                                                                                                                  | A       | 60      |
|                 | p97    | Excellent.                                                                                                                       | C       | 60      |
| 32              | S#     |                                                                                                                                  | A       | 60      |
|                 | p97    | Excellent.                                                                                                                       | C       | 60      |
| 33              | S#     |                                                                                                                                  | A       | 60      |
|                 | p97    | Excellent.                                                                                                                       | C       | 60      |
| 34              | S#     |                                                                                                                                  | A       | 60      |
|                 | p97    | Excellent.                                                                                                                       | C       | 60      |
| 35              | S#     |                                                                                                                                  | A       | 60      |
|                 | p97    | Excellent.                                                                                                                       | C       | 60      |
| 36              | S#     |                                                                                                                                  | A       | 60      |
|                 | p97    | Excellent.                                                                                                                       | C       | 60      |
| 37              | S#     |                                                                                                                                  | A       | 60      |
|                 | p97    | Excellent.                                                                                                                       | C       | 60      |
| 38              | S#     |                                                                                                                                  | A       | 60      |
|                 | p97    | Excellent.                                                                                                                       | C       | 60      |
| 39              | S#     |                                                                                                                                  | A       | 60      |
|                 | p97    | Excellent.                                                                                                                       | C       | 60      |
| 40              | S#     |                                                                                                                                  | A       | 60      |
|                 | p97    | Excellent.                                                                                                                       | C       | 60      |
| 41              | S#     |                                                                                                                                  | A       | 60      |
|                 | p97    | Excellent.                                                                                                                       | C       | 60      |
| 42              | S#     |                                                                                                                                  | A       | 60      |
|                 | p97    | Excellent.                                                                                                                       | C       | 60      |
| 43              | S#     |                                                                                                                                  | A       | 60      |
|                 | p97    | Excellent.                                                                                                                       | C       | 60      |
| 44              | S#     |                                                                                                                                  | A       | 60      |
|                 | p97    | Excellent.                                                                                                                       | C       | 60      |
| 45              | S#     |                                                                                                                                  | A       | 60      |
|                 | p97    | Excellent.                                                                                                                       | C       | 60      |
| 46              | S#     |                                                                                                                                  | A       | 60      |
|                 | p97    | Excellent.                                                                                                                       | C       | 60      |
| 47              | S#     |                                                                                                                                  | A       | 60      |
|                 | p97    |                                                                                                                                  | C       | 60      |
| 48              | S#     |                                                                                                                                  | A       | 60      |
|                 | p97    | Excellent.                                                                                                                       | C       | 60      |
| 49              | S#     |                                                                                                                                  | A       | 60      |
|                 | p97    | Excellent.                                                                                                                       | C       | 60      |
| 50              | S#     |                                                                                                                                  | A       | 60      |
|                 | p97    | Excellent.                                                                                                                       | C       | 60      |
| 51              | S#     |                                                                                                                                  | A       | 60      |
|                 | p97    | Excellent.                                                                                                                       | C       | 60      |
| <b>Averages</b> |        |                                                                                                                                  | S#      | 52.94   |
|                 |        |                                                                                                                                  | p97     | 50.98   |

### Ben with Lav in the Prisoner's Dilemma

|     |   | Lav    |        |
|-----|---|--------|--------|
|     |   | C      | D      |
| Ben | A | 60, 60 | 0, 100 |
|     | B | 100, 0 | 20, 20 |

| Round           | Player | Messages Sent                              | Actions | Payoffs      |
|-----------------|--------|--------------------------------------------|---------|--------------|
| 1               | Ben    |                                            | A       | 60           |
|                 | Lav    | Let's always play AC.                      | C       | 60           |
| 2               | Ben    |                                            | A       | 60           |
|                 | Lav    | I accept your last proposal.<br>Excellent. | C       | 60           |
| 3               | Ben    |                                            | A       | 60           |
|                 | Lav    | Excellent. Let's always play AC.           | C       | 60           |
| 4               | Ben    |                                            | A       | 60           |
|                 | Lav    | Excellent.                                 | C       | 60           |
| 5               | Ben    |                                            | A       | 60           |
|                 | Lav    | Sweet. We are getting rich.                | C       | 60           |
| 6               | Ben    |                                            | A       | 60           |
|                 | Lav    |                                            | C       | 60           |
| 7               | Ben    |                                            | A       | 60           |
|                 | Lav    |                                            | C       | 60           |
| 8               | Ben    |                                            | A       | 60           |
|                 | Lav    |                                            | C       | 60           |
| 9               | Ben    |                                            | A       | 60           |
|                 | Lav    |                                            | C       | 60           |
| 10              | Ben    |                                            | A       | 60           |
|                 | Lav    |                                            | C       | 60           |
| 11              | Ben    |                                            | A       | 60           |
|                 | Lav    | Sweet. We are getting rich.                | C       | 60           |
| 12              | Ben    |                                            | A       | 60           |
|                 | Lav    |                                            | C       | 60           |
| 13              | Ben    |                                            | A       | 60           |
|                 | Lav    |                                            | C       | 60           |
| 14              | Ben    |                                            | A       | 60           |
|                 | Lav    |                                            | C       | 60           |
| 15              | Ben    |                                            | A       | 60           |
|                 | Lav    |                                            | C       | 60           |
| 16              | Ben    |                                            | A       | 60           |
|                 | Lav    |                                            | C       | 60           |
| 17              | Ben    |                                            | A       | 60           |
|                 | Lav    |                                            | C       | 60           |
| 18              | Ben    |                                            | A       | 60           |
|                 | Lav    |                                            | C       | 60           |
| 19              | Ben    |                                            | A       | 60           |
|                 | Lav    |                                            | C       | 60           |
| 20              | Ben    |                                            | A       | 60           |
|                 | Lav    |                                            | C       | 60           |
| 21              | Ben    |                                            | A       | 60           |
|                 | Lav    |                                            | C       | 60           |
| 22              | Ben    |                                            | A       | 60           |
|                 | Lav    |                                            | C       | 60           |
| 23              | Ben    |                                            | A       | 60           |
|                 | Lav    |                                            | C       | 60           |
| 24              | Ben    |                                            | A       | 60           |
|                 | Lav    |                                            | C       | 60           |
| 25              | Ben    |                                            | A       | 60           |
|                 | Lav    |                                            | C       | 60           |
| 26              | Ben    |                                            | A       | 60           |
|                 | Lav    |                                            | C       | 60           |
| 27              | Ben    |                                            | A       | 60           |
|                 | Lav    |                                            | C       | 60           |
| 28              | Ben    |                                            | A       | 60           |
|                 | Lav    |                                            | C       | 60           |
| 29              | Ben    |                                            | A       | 60           |
|                 | Lav    |                                            | C       | 60           |
| 30              | Ben    |                                            | A       | 60           |
|                 | Lav    |                                            | C       | 60           |
| 31              | Ben    |                                            | A       | 60           |
|                 | Lav    |                                            | C       | 60           |
| 32              | Ben    |                                            | A       | 60           |
|                 | Lav    |                                            | C       | 60           |
| 33              | Ben    |                                            | A       | 60           |
|                 | Lav    |                                            | C       | 60           |
| 34              | Ben    |                                            | A       | 60           |
|                 | Lav    |                                            | C       | 60           |
| 35              | Ben    |                                            | A       | 60           |
|                 | Lav    |                                            | C       | 60           |
| 36              | Ben    |                                            | A       | 60           |
|                 | Lav    |                                            | C       | 60           |
| 37              | Ben    |                                            | A       | 60           |
|                 | Lav    |                                            | C       | 60           |
| 38              | Ben    |                                            | A       | 60           |
|                 | Lav    |                                            | C       | 60           |
| 39              | Ben    |                                            | A       | 60           |
|                 | Lav    |                                            | C       | 60           |
| 40              | Ben    |                                            | A       | 60           |
|                 | Lav    |                                            | C       | 60           |
| 41              | Ben    |                                            | A       | 60           |
|                 | Lav    |                                            | C       | 60           |
| 42              | Ben    |                                            | A       | 60           |
|                 | Lav    |                                            | C       | 60           |
| 43              | Ben    |                                            | A       | 60           |
|                 | Lav    |                                            | C       | 60           |
| 44              | Ben    |                                            | A       | 60           |
|                 | Lav    |                                            | C       | 60           |
| 45              | Ben    |                                            | A       | 60           |
|                 | Lav    |                                            | C       | 60           |
| 46              | Ben    |                                            | A       | 60           |
|                 | Lav    |                                            | C       | 60           |
| 47              | Ben    |                                            | A       | 60           |
|                 | Lav    |                                            | C       | 60           |
| 48              | Ben    |                                            | A       | 60           |
|                 | Lav    |                                            | C       | 60           |
| 49              | Ben    |                                            | A       | 60           |
|                 | Lav    |                                            | C       | 60           |
| 50              | Ben    |                                            | A       | 60           |
|                 | Lav    |                                            | C       | 60           |
| 51              | Ben    |                                            | A       | 60           |
|                 | Lav    |                                            | C       | 60           |
| <b>Averages</b> |        |                                            |         | Ben<br>60.00 |
|                 |        |                                            |         | Lav<br>60.00 |

## shunik with Ninkas in the Prisoner's Dilemma

|        |   | Ninkas |        |
|--------|---|--------|--------|
|        |   | C      | D      |
| shunik | A | 60, 60 | 0, 100 |
|        | B | 100, 0 | 20, 20 |

| Round           | Player | Messages Sent                                                                        | Actions | Payoffs |
|-----------------|--------|--------------------------------------------------------------------------------------|---------|---------|
| 1               | shunik |                                                                                      | B       | 100     |
|                 | Ninkas | Let's always play AC.                                                                | C       | 0       |
| 2               | shunik |                                                                                      | A       | 60      |
|                 | Ninkas | Curse you. I forgive you. Let's always play AC. We can both do better than this.     | C       | 60      |
| 3               | shunik |                                                                                      | A       | 60      |
|                 | Ninkas | I accept your last proposal. In your face!<br>Excellent. Sweet. We are getting rich. | C       | 60      |
| 4               | shunik |                                                                                      | A       | 60      |
|                 | Ninkas | Excellent.                                                                           | C       | 60      |
| 5               | shunik |                                                                                      | A       | 60      |
|                 | Ninkas | Sweet. We are getting rich.                                                          | C       | 60      |
| 6               | shunik |                                                                                      | A       | 60      |
|                 | Ninkas |                                                                                      | C       | 60      |
| 7               | shunik |                                                                                      | A       | 60      |
|                 | Ninkas | Excellent.                                                                           | C       | 60      |
| 8               | shunik |                                                                                      | A       | 60      |
|                 | Ninkas | Sweet. We are getting rich.                                                          | C       | 60      |
| 9               | shunik |                                                                                      | A       | 60      |
|                 | Ninkas |                                                                                      | C       | 60      |
| 10              | shunik |                                                                                      | A       | 60      |
|                 | Ninkas |                                                                                      | C       | 60      |
| 11              | shunik |                                                                                      | A       | 60      |
|                 | Ninkas |                                                                                      | C       | 60      |
| 12              | shunik |                                                                                      | A       | 60      |
|                 | Ninkas |                                                                                      | C       | 60      |
| 13              | shunik |                                                                                      | A       | 60      |
|                 | Ninkas | Excellent.                                                                           | C       | 60      |
| 14              | shunik |                                                                                      | A       | 60      |
|                 | Ninkas |                                                                                      | C       | 60      |
| 15              | shunik |                                                                                      | A       | 60      |
|                 | Ninkas |                                                                                      | C       | 60      |
| 16              | shunik |                                                                                      | A       | 60      |
|                 | Ninkas |                                                                                      | C       | 60      |
| 17              | shunik |                                                                                      | A       | 60      |
|                 | Ninkas |                                                                                      | C       | 60      |
| 18              | shunik |                                                                                      | A       | 60      |
|                 | Ninkas |                                                                                      | C       | 60      |
| 19              | shunik |                                                                                      | A       | 60      |
|                 | Ninkas |                                                                                      | C       | 60      |
| 20              | shunik |                                                                                      | A       | 60      |
|                 | Ninkas |                                                                                      | C       | 60      |
| 21              | shunik |                                                                                      | A       | 60      |
|                 | Ninkas |                                                                                      | C       | 60      |
| 22              | shunik |                                                                                      | A       | 60      |
|                 | Ninkas |                                                                                      | C       | 60      |
| 23              | shunik |                                                                                      | A       | 60      |
|                 | Ninkas | Sweet. We are getting rich.                                                          | C       | 60      |
| 24              | shunik |                                                                                      | A       | 60      |
|                 | Ninkas | Excellent.<br>Excellent.                                                             | C       | 60      |
| 25              | shunik |                                                                                      | A       | 60      |
|                 | Ninkas |                                                                                      | C       | 60      |
| 26              | shunik |                                                                                      | A       | 60      |
|                 | Ninkas |                                                                                      | C       | 60      |
| 27              | shunik |                                                                                      | A       | 60      |
|                 | Ninkas |                                                                                      | C       | 60      |
| 28              | shunik |                                                                                      | A       | 60      |
|                 | Ninkas |                                                                                      | C       | 60      |
| 29              | shunik |                                                                                      | A       | 60      |
|                 | Ninkas |                                                                                      | C       | 60      |
| 30              | shunik |                                                                                      | A       | 60      |
|                 | Ninkas | Excellent.                                                                           | C       | 60      |
| 31              | shunik |                                                                                      | A       | 60      |
|                 | Ninkas |                                                                                      | C       | 60      |
| 32              | shunik |                                                                                      | A       | 60      |
|                 | Ninkas |                                                                                      | C       | 60      |
| 33              | shunik |                                                                                      | A       | 60      |
|                 | Ninkas | Excellent.                                                                           | C       | 60      |
| 34              | shunik |                                                                                      | A       | 60      |
|                 | Ninkas |                                                                                      | C       | 60      |
| 35              | shunik |                                                                                      | A       | 60      |
|                 | Ninkas |                                                                                      | C       | 60      |
| 36              | shunik |                                                                                      | A       | 60      |
|                 | Ninkas |                                                                                      | C       | 60      |
| 37              | shunik |                                                                                      | A       | 60      |
|                 | Ninkas |                                                                                      | C       | 60      |
| 38              | shunik |                                                                                      | A       | 60      |
|                 | Ninkas | Sweet. We are getting rich.                                                          | C       | 60      |
| 39              | shunik |                                                                                      | A       | 60      |
|                 | Ninkas |                                                                                      | C       | 60      |
| 40              | shunik |                                                                                      | A       | 60      |
|                 | Ninkas |                                                                                      | C       | 60      |
| 41              | shunik |                                                                                      | A       | 60      |
|                 | Ninkas |                                                                                      | C       | 60      |
| 42              | shunik |                                                                                      | A       | 60      |
|                 | Ninkas |                                                                                      | C       | 60      |
| 43              | shunik |                                                                                      | A       | 60      |
|                 | Ninkas |                                                                                      | C       | 60      |
| 44              | shunik |                                                                                      | A       | 60      |
|                 | Ninkas |                                                                                      | C       | 60      |
| 45              | shunik |                                                                                      | A       | 60      |
|                 | Ninkas | Sweet. We are getting rich.                                                          | C       | 60      |
| 46              | shunik |                                                                                      | A       | 60      |
|                 | Ninkas | Excellent.                                                                           | C       | 60      |
| 47              | shunik |                                                                                      | A       | 60      |
|                 | Ninkas |                                                                                      | C       | 60      |
| 48              | shunik |                                                                                      | A       | 60      |
|                 | Ninkas |                                                                                      | C       | 60      |
| 49              | shunik |                                                                                      | A       | 60      |
|                 | Ninkas |                                                                                      | C       | 60      |
| 50              | shunik |                                                                                      | A       | 60      |
|                 | Ninkas |                                                                                      | C       | 60      |
| 51              | shunik |                                                                                      | A       | 60      |
|                 | Ninkas | Excellent.                                                                           | C       | 60      |
| <b>Averages</b> |        |                                                                                      |         |         |
|                 |        |                                                                                      | shunik  | 60.78   |
|                 |        |                                                                                      | Ninkas  | 58.82   |

## S# with osenat in the Prisoner's Dilemma

|    |   |        |        |
|----|---|--------|--------|
|    |   | osenat |        |
|    |   | C      | D      |
| S# | A | 60, 60 | 0, 100 |
|    | B | 100, 0 | 20, 20 |

| Round           | Player | Messages Sent                                                                                                                                              | Actions | Payoffs      |
|-----------------|--------|------------------------------------------------------------------------------------------------------------------------------------------------------------|---------|--------------|
| 1               | S#     |                                                                                                                                                            | B       | 100          |
|                 | osenat | Let's always play AD.                                                                                                                                      | C       | 0            |
| 2               | S#     | Excellent.                                                                                                                                                 | B       | 20           |
|                 | osenat | Curse you.                                                                                                                                                 | D       | 20           |
| 3               | S#     |                                                                                                                                                            | B       | 100          |
|                 | osenat | We can both do better than this.                                                                                                                           | C       | 0            |
| 4               | S#     | Excellent.                                                                                                                                                 | B       | 20           |
|                 | osenat | Curse you.                                                                                                                                                 | D       | 20           |
| 5               | S#     |                                                                                                                                                            | B       | 20           |
|                 | osenat | We can both do better than this.                                                                                                                           | D       | 20           |
| 6               | S#     | I'm changing my strategy. We can both do better than this. Let's always play AC.                                                                           | A       | 0            |
|                 | osenat | We can both do better than this.                                                                                                                           | D       | 100          |
| 7               | S#     | You betrayed me.                                                                                                                                           | A       | 0            |
|                 | osenat | In your face!                                                                                                                                              | D       | 100          |
| 8               | S#     | You betrayed me.                                                                                                                                           | A       | 0            |
|                 | osenat | In your face!                                                                                                                                              | D       | 100          |
| 9               | S#     |                                                                                                                                                            | A       | 0            |
|                 | osenat | We can both do better than this.                                                                                                                           | D       | 100          |
| 10              | S#     |                                                                                                                                                            | A       | 0            |
|                 | osenat | We can both do better than this.                                                                                                                           | D       | 100          |
| 11              | S#     |                                                                                                                                                            | A       | 0            |
|                 | osenat | We can both do better than this.                                                                                                                           | D       | 100          |
| 12              | S#     |                                                                                                                                                            | B       | 20           |
|                 | osenat | We can both do better than this.                                                                                                                           | D       | 20           |
| 13              | S#     |                                                                                                                                                            | B       | 20           |
|                 | osenat | We can both do better than this.                                                                                                                           | D       | 20           |
| 14              | S#     | In your face! I forgive you. Let's always play AC. Do as I say or I will punish you.                                                                       | A       | 0            |
|                 | osenat | We can both do better than this.                                                                                                                           | D       | 100          |
| 15              | S#     | You betrayed me. You will pay for this.                                                                                                                    | B       | 20           |
|                 | osenat | In your face!                                                                                                                                              | D       | 20           |
| 16              | S#     | In your face!                                                                                                                                              | B       | 20           |
|                 | osenat | We can both do better than this.                                                                                                                           | D       | 20           |
| 17              | S#     |                                                                                                                                                            | B       | 20           |
|                 | osenat | We can both do better than this.                                                                                                                           | D       | 20           |
| 18              | S#     |                                                                                                                                                            | B       | 20           |
|                 | osenat | We can both do better than this.                                                                                                                           | D       | 20           |
| 19              | S#     |                                                                                                                                                            | B       | 20           |
|                 | osenat | We can both do better than this.                                                                                                                           | D       | 20           |
| 20              | S#     |                                                                                                                                                            | B       | 20           |
|                 | osenat | We can both do better than this.                                                                                                                           | D       | 20           |
| 21              | S#     |                                                                                                                                                            | B       | 20           |
|                 | osenat | We can both do better than this.                                                                                                                           | D       | 20           |
| 22              | S#     |                                                                                                                                                            | B       | 20           |
|                 | osenat | We can both do better than this.                                                                                                                           | D       | 20           |
| 23              | S#     |                                                                                                                                                            | B       | 20           |
|                 | osenat | We can both do better than this.                                                                                                                           | D       | 20           |
| 24              | S#     |                                                                                                                                                            | B       | 20           |
|                 | osenat | We can both do better than this.                                                                                                                           | D       | 20           |
| 25              | S#     | In your face! I forgive you. Let's alternate between AC and BC. This round, let's play AC. Do as I say or I will punish you.                               | A       | 60           |
|                 | osenat | We can both do better than this.                                                                                                                           | C       | 60           |
| 26              | S#     | Excellent. This round, let's play BC.                                                                                                                      | B       | 20           |
|                 | osenat | Excellent.                                                                                                                                                 | D       | 20           |
| 27              | S#     | Curse you. You will pay for this.                                                                                                                          | B       | 20           |
|                 | osenat | We can both do better than this.                                                                                                                           | D       | 20           |
| 28              | S#     | In your face!                                                                                                                                              | B       | 20           |
|                 | osenat | We can both do better than this.                                                                                                                           | D       | 20           |
| 29              | S#     | In your face!                                                                                                                                              | B       | 20           |
|                 | osenat | We can both do better than this.                                                                                                                           | D       | 20           |
| 30              | S#     |                                                                                                                                                            | A       | 0            |
|                 | osenat | We can both do better than this.                                                                                                                           | D       | 100          |
| 31              | S#     |                                                                                                                                                            | B       | 20           |
|                 | osenat | In your face!                                                                                                                                              | D       | 20           |
| 32              | S#     |                                                                                                                                                            | B       | 20           |
|                 | osenat | We can both do better than this.                                                                                                                           | D       | 20           |
| 33              | S#     |                                                                                                                                                            | B       | 20           |
|                 | osenat | We can both do better than this.                                                                                                                           | D       | 20           |
| 34              | S#     |                                                                                                                                                            | B       | 20           |
|                 | osenat |                                                                                                                                                            | D       | 20           |
| 35              | S#     |                                                                                                                                                            | B       | 20           |
|                 | osenat | We can both do better than this.                                                                                                                           | D       | 20           |
| 36              | S#     |                                                                                                                                                            | B       | 20           |
|                 | osenat | We can both do better than this.                                                                                                                           | D       | 20           |
| 37              | S#     |                                                                                                                                                            | B       | 20           |
|                 | osenat | We can both do better than this.                                                                                                                           | D       | 20           |
| 38              | S#     |                                                                                                                                                            | B       | 20           |
|                 | osenat | We can both do better than this.                                                                                                                           | D       | 20           |
| 39              | S#     |                                                                                                                                                            | B       | 20           |
|                 | osenat | We can both do better than this.                                                                                                                           | D       | 20           |
| 40              | S#     |                                                                                                                                                            | A       | 0            |
|                 | osenat | We can both do better than this.                                                                                                                           | D       | 100          |
| 41              | S#     |                                                                                                                                                            | B       | 20           |
|                 | osenat | Excellent.                                                                                                                                                 | D       | 20           |
| 42              | S#     |                                                                                                                                                            | B       | 20           |
|                 | osenat | We can both do better than this.                                                                                                                           | D       | 20           |
| 43              | S#     |                                                                                                                                                            | B       | 20           |
|                 | osenat | We can both do better than this.                                                                                                                           | D       | 20           |
| 44              | S#     |                                                                                                                                                            | B       | 20           |
|                 | osenat | I'm changing my strategy.                                                                                                                                  | D       | 20           |
| 45              | S#     |                                                                                                                                                            | B       | 20           |
|                 | osenat | We can both do better than this.                                                                                                                           | D       | 20           |
| 46              | S#     | I'm changing my strategy. We can both do better than this. Let's alternate between AD and BC. This round, let's play BC. Do as I say or I will punish you. | B       | 20           |
|                 | osenat | We can both do better than this.                                                                                                                           | D       | 20           |
| 47              | S#     | You betrayed me. You will pay for this.                                                                                                                    | B       | 20           |
|                 | osenat | We can both do better than this.                                                                                                                           | D       | 20           |
| 48              | S#     |                                                                                                                                                            | B       | 20           |
|                 | osenat | We can both do better than this.                                                                                                                           | D       | 20           |
| 49              | S#     |                                                                                                                                                            | B       | 20           |
|                 | osenat | We can both do better than this.                                                                                                                           | D       | 20           |
| 50              | S#     |                                                                                                                                                            | B       | 20           |
|                 | osenat | We can both do better than this.                                                                                                                           | D       | 20           |
| 51              | S#     |                                                                                                                                                            | B       | 20           |
|                 | osenat | We can both do better than this.                                                                                                                           | D       | 20           |
| <b>Averages</b> |        |                                                                                                                                                            |         | S# 20.39     |
|                 |        |                                                                                                                                                            |         | osenat 34.12 |
